# Supplementary material
Source: PubMed Central journal article supplement (PMC8011853)
Supplement: NIHMS1677376-supplement-Supp_Info.pdf [file NIHMS1677376-supplement-Supp_Info.pdf]

## SUPPORTING INFORMATION

### Aggregation and Solvation of Sodium Hexamethyldisilazide Across the Solvent Spectrum

Ryan A. Woltornist and David B. Collum\*  
Department of Chemistry and Chemical Biology  
Baker Laboratory, Cornell University  
Ithaca, New York 14853–1301, United States  
[dbc6@cornell.edu](mailto:dbc6@cornell.edu)

#### I. NMR Spectroscopic Data and Computed Free Energies

|                |                                                                                                                          |      |
|----------------|--------------------------------------------------------------------------------------------------------------------------|------|
| Table S1       | Expanded version of Table S1 that includes $^{13}\text{C}$ and $^{15}\text{N}$ chemical shifts.                          | S-17 |
| <b>Toluene</b> |                                                                                                                          |      |
| Figure S1.     | $^{13}\text{C}$ , $^{15}\text{N}$ , and $^{29}\text{Si}$ NMR spectra of NaHMDS in 2:1 pentane/toluene at 25 °C.          | S-20 |
| Figure S2.     | $^{13}\text{C}$ NMR spectra and affiliated Job plot derived from NaHMDS and NaTMDS mixtures in neat toluene at –80 °C.   | S-21 |
| Figure S3.     | $^{29}\text{Si}$ NMR spectra and affiliated Job plot derived from NaHMDS and NaTMDS in neat toluene at –80 °C.           | S-22 |
| Figure S4      | $^{13}\text{C}$ NMR spectra and affiliated Job plot derived from NaHMDS and NaDPTMDS mixtures in neat toluene at –80 °C. | S-23 |
| <b>Benzene</b> |                                                                                                                          |      |
| Figure S5      | $^{13}\text{C}$ , $^{15}\text{N}$ , and $^{29}\text{Si}$ NMR spectra of NaHMDS in benzene at 25 °C.                      | S-24 |
| <b>Styrene</b> |                                                                                                                          |      |
| Figure S6      | $^{13}\text{C}$ , $^{15}\text{N}$ , and $^{29}\text{Si}$ NMR spectra of NaHMDS in styrene at 25 °C.                      | S-25 |
| <b>DMEA</b>    |                                                                                                                          |      |
| Figure S7      | $^{13}\text{C}$ , $^{15}\text{N}$ , and $^{29}\text{Si}$ NMR spectra of NaHMDS in DMEA at –120 °C.                       | S-26 |
| Figure S8      | $^{13}\text{C}$ NMR spectra varying mole fractions of NaHMDS and NaCPTMDS with DMEA in toluene cosolvent at –80 °C.      | S-27 |
| Figure S9      | $^1\text{H}$ NMR spectra for the titration of NaHMDS in toluene with DMEA at 25 °C.                                      | S-28 |

|                                |                                                                                                                                                               |      |
|--------------------------------|---------------------------------------------------------------------------------------------------------------------------------------------------------------|------|
| Figure S10                     | $^{13}\text{C}$ NMR spectra varying mole fractions of NaHMDS and NaTMDS in DMEA with toluene cosolvent at $-80\text{ }^\circ\text{C}$ .                       | S-29 |
| <b>Et<sub>3</sub>N</b>         |                                                                                                                                                               |      |
| Figure S11                     | $^{13}\text{C}$ , $^{15}\text{N}$ , and $^{29}\text{Si}$ NMR spectra of NaHMDS in Et <sub>3</sub> N at $25\text{ }^\circ\text{C}$ .                           | S-30 |
| Figure S12                     | $^1\text{H}$ and $^{29}\text{Si}$ NMR spectra for the titration of NaHMDS in toluene with Et <sub>3</sub> N at $-80\text{ }^\circ\text{C}$ .                  | S-31 |
| Figure S13                     | $^{13}\text{C}$ NMR spectra varying mole fractions of NaHMDS and NaTMDS in Et <sub>3</sub> N with toluene cosolvent at $-80\text{ }^\circ\text{C}$ .          | S-32 |
| Figure S14                     | $^{13}\text{C}$ NMR spectra of NaTMDS in Et <sub>3</sub> N with toluene cosolvent at $-100\text{ }^\circ\text{C}$ showing solvent in the slow exchange limit. | S-33 |
| Figure S15                     | $^{13}\text{C}$ NMR spectra of NaHMDS in Et <sub>3</sub> N with toluene cosolvent at $-120\text{ }^\circ\text{C}$ showing solvent in the slow exchange limit. | S-34 |
| <b><i>N</i>-Me-pyrrolidine</b> |                                                                                                                                                               |      |
| Figure S16                     | $^1\text{H}$ NMR spectra for the titration of NaHMDS in toluene with <i>N</i> -Me-pyrrolidine at $25\text{ }^\circ\text{C}$ .                                 | S-35 |
| Figure S17                     | $^{29}\text{Si}$ NMR spectra for the titration of NaHMDS in pentane/toluene with <i>N</i> -Me-pyrrolidine at $-120\text{ }^\circ\text{C}$ .                   | S-36 |
| <b>Pyridine</b>                |                                                                                                                                                               |      |
| Figure S18                     | $^{13}\text{C}$ , $^{15}\text{N}$ , and $^{29}\text{Si}$ NMR spectra of NaHMDS with pyridine in various solvents and temperatures.                            | S-37 |
| Figure S19                     | $^{13}\text{C}$ NMR spectra varying mole fractions of NaHMDS and NaTMDS in pyridine with toluene cosolvent at $-80\text{ }^\circ\text{C}$ .                   | S-38 |
| Figure S20                     | $^{29}\text{Si}$ NMR spectra of NaHMDS in pentane/toluene varying the concentration of pyridine at $+50\text{ }^\circ\text{C}$ .                              | S-39 |
| <b>Pyrrolidine</b>             |                                                                                                                                                               |      |
| Figure S21                     | DFT computed energies of various NaHMDS pyrrolidine solvation states.                                                                                         | S-40 |
| Figure S22                     | $^{29}\text{Si}$ NMR spectra for the titration of NaHMDS in MTBE with pyrrolidine at $-120\text{ }^\circ\text{C}$ .                                           | S-41 |

## Et<sub>2</sub>O

|            |                                                                                                                                           |      |
|------------|-------------------------------------------------------------------------------------------------------------------------------------------|------|
| Figure S23 | <sup>13</sup> C, <sup>15</sup> N, and <sup>29</sup> Si NMR spectra of NaHMDS with Et <sub>2</sub> O in various solvents and temperatures. | S-42 |
| Figure S24 | <sup>13</sup> C NMR spectra varying mole fractions of NaHMDS and NaTMDS in Et <sub>2</sub> O with toluene cosolvent at –80 °C.            | S-43 |
| Figure S25 | <sup>29</sup> Si NMR spectra of [ <sup>15</sup> N]NaHMDS DMEA cosolvent with varying amounts of Et <sub>2</sub> O added at –120 °C.       | S-44 |

## MTBE

|            |                                                                                                                                       |      |
|------------|---------------------------------------------------------------------------------------------------------------------------------------|------|
| Figure S26 | <sup>13</sup> C, <sup>15</sup> N, and <sup>29</sup> Si NMR spectra of NaHMDS with MTBE in various solvents and temperatures.          | S-45 |
| Figure S27 | <sup>1</sup> H and <sup>13</sup> C NMR spectra for the titration of NaHMDS in toluene with MTBE at 25 °C.                             | S-46 |
| Figure S28 | <sup>13</sup> C NMR spectra and affiliated Job plot derived from NaHMDS and NaTMDS mixtures in MTBE with toluene cosolvent at –80 °C. | S-47 |
| Figure S29 | <sup>1</sup> H spectra for the titration of NaHMDS in toluene with MTBE at –80 °C.                                                    | S-48 |

## 1,4-dioxane

|            |                                                                                                           |      |
|------------|-----------------------------------------------------------------------------------------------------------|------|
| Figure S30 | Computed free energies for the serial solvation of NaHMDS with 1,4-dioxane.                               | S-49 |
| Figure S31 | <sup>29</sup> Si NMR spectra of NaHMDS in pentane/toluene varying the concentration of dioxane at +20 °C. | S-50 |

## 1,3-dioxolane

|            |                                                                                                            |      |
|------------|------------------------------------------------------------------------------------------------------------|------|
| Figure S32 | <sup>29</sup> Si NMR spectra for the titration of NaHMDS in pentane/toluene with 1,3-dioxolane at –120 °C. | S-51 |
|------------|------------------------------------------------------------------------------------------------------------|------|

## THF

|            |                                                                                                                   |      |
|------------|-------------------------------------------------------------------------------------------------------------------|------|
| Figure S33 | <sup>13</sup> C, <sup>15</sup> N, and <sup>29</sup> Si NMR spectra of NaHMDS with THF in DMEA at –120 °C.         | S-52 |
| Figure S34 | <sup>1</sup> H and <sup>29</sup> Si NMR spectra for the titration of NaHMDS in toluene with THF at –80 °C.        | S-53 |
| Figure S35 | <sup>29</sup> Si NMR spectra for the titration of NaHMDS in DMEA with THF at –120 °C.                             | S-54 |
| Figure S36 | <sup>29</sup> Si NMR spectra varying mole fractions of NaHMDS and NaTMDS in THF with toluene cosolvent at –80 °C. | S-55 |

|             |                                                                                                                                                |      |
|-------------|------------------------------------------------------------------------------------------------------------------------------------------------|------|
| Figure S37  | $^{29}\text{Si}$ NMR spectra of NaHMDS in pentane/toluene varying the concentration of THF at +50 °C.                                          | S-56 |
| Figure S38  | $^{29}\text{Si}$ NMR spectra of NaHMDS in pentane/toluene varying the concentration of THF at +20 °C.                                          | S-57 |
| Figure S39  | $^{29}\text{Si}$ NMR spectra of NaHMDS in pentane/toluene varying the concentration of THF at –20 °C.                                          | S-58 |
| Figure S40  | $^{29}\text{Si}$ NMR spectra of NaHMDS in pentane/toluene varying the concentration of THF at +20 °C to show differences in fitting functions. | S-59 |
| Figure S41  | $^{13}\text{C}$ NMR spectra varying mole fractions of NaHMDS and NaTMDS in THF with toluene cosolvent at –80 °C.                               | S-60 |
| <b>HMPA</b> |                                                                                                                                                |      |
| Figure S42  | Computed free energies for the serial solvation of NaHMDS with HMPA.                                                                           | S-61 |
| Figure S43  | $^{29}\text{Si}$ NMR spectra for the titration of NaHMDS in toluene with HMPA at –80 °C.                                                       | S-62 |
| Figure S44  | $^1\text{H}$ and $^{29}\text{Si}$ NMR spectra for the titration of NaHMDS in DMEA with HMPA at –120 °C.                                        | S-63 |
| Figure S45  | $^{29}\text{Si}\{^1\text{H}\}$ NMR spectra of NaHMDS in 2:1 HMPA:MTBE at various temperatures to show ion pair.                                | S-64 |
| Figure S46  | $^{29}\text{Si}$ NMR spectra of NaHMDS in MTBE at –110 °C with incremental additions of 1:1 PMDTA/HMPA.                                        | S-65 |
| Figure S47  | $^{29}\text{Si}$ NMR spectra of NaHMDS in MTBE at –110 °C with incremental additions of 1:1 DME/HMPA.                                          | S-66 |
| Figure S48  | $^{31}\text{P}$ NMR spectra for the titration of NaHMDS in pentane/toluene with HMPA at –80 °C.                                                | S-67 |
| <b>DMPU</b> |                                                                                                                                                |      |
| Figure S49  | Computed free energies for the serial solvation of NaHMDS with DMPU.                                                                           | S-68 |
| Figure S50  | $^{29}\text{Si}$ NMR spectra for the titration of NaHMDS in MTBE with DMPU at –110 °C.                                                         | S-69 |
| <b>DMF</b>  |                                                                                                                                                |      |
| Figure S51  | $^{29}\text{Si}$ NMR spectra for the titration of NaHMDS in MTBE with DMF at –110 °C.                                                          | S-70 |

## **DMSO**

Figure S52  $^{29}\text{Si}$  NMR spectra for the titration of NaHMDS in toluene with DMSO at  $-80\text{ }^{\circ}\text{C}$ . S-71

## **TMEDA**

Figure S53  $^{13}\text{C}$  NMR spectra varying mole fractions of NaHMDS and NaTMDS in TMEDA with toluene cosolvent at  $-100\text{ }^{\circ}\text{C}$ . S-72

Figure S54  $^{13}\text{C}$  NMR spectra of NaHMDS in pentane/toluene cosolvent with varying amounts of TMEDA added at  $-120\text{ }^{\circ}\text{C}$ . S-73

Figure S55  $^{29}\text{Si}$  NMR spectra of NaHMDS in DMEA cosolvent with varying amounts of TMEDA added at  $-120\text{ }^{\circ}\text{C}$ . S-74

Figure S56  $^{29}\text{Si}$  NMR spectra of NaHMDS in pentane/toluene cosolvent with varying amounts of TMEDA added at  $-120\text{ }^{\circ}\text{C}$ . S-75

Figure S57  $^{29}\text{Si}$  NMR spectra of NaHMDS in pentane/toluene at  $-120\text{ }^{\circ}\text{C}$  with incremental additions of 1:1 TMEDA/DMEA. S-76

Figure S58  $^{29}\text{Si}$  NMR spectra of NaHMDS in pentane/toluene varying the concentration of TMEDA at  $-20\text{ }^{\circ}\text{C}$ . S-77

## **TMCDA**

Figure S59 Computed free energies for the serial solvation of NaHMDS with TMCDA. S-78

Figure S60  $^{13}\text{C}$  NMR spectra varying mole fractions of NaHMDS and NaTMDS in TMCDA with toluene cosolvent at  $-80\text{ }^{\circ}\text{C}$ . S-79

Figure S61  $^{29}\text{Si}$  NMR spectra of NaHMDS in DMEA cosolvent with varying amounts of TMCDA added at  $-120\text{ }^{\circ}\text{C}$ . S-80

## **Sparteine**

Figure S62  $^{29}\text{Si}$  NMR spectra of NaHMDS in DMEA cosolvent with varying amounts of sparteine added at  $-120\text{ }^{\circ}\text{C}$ . S-81

## **bipy**

Figure S63 Computed free energies for the serial solvation of NaHMDS with bipy. S-82

Figure S64  $^{29}\text{Si}$  NMR spectra of NaHMDS in DMEA cosolvent with varying amounts of bipy added at  $-120\text{ }^{\circ}\text{C}$ . S-83

## **DME**

Figure S65  $^{13}\text{C}$  NMR spectra varying mole fractions of NaHMDS and NaTMDS in DME with toluene cosolvent at  $-80\text{ }^{\circ}\text{C}$  and  $-100\text{ }^{\circ}\text{C}$ . S-84

|                |                                                                                                                                                 |      |
|----------------|-------------------------------------------------------------------------------------------------------------------------------------------------|------|
| Figure S66     | $^1\text{H}$ and $^{29}\text{Si}$ NMR spectra for the titration of NaHMDS in toluene with DME at $-80\text{ }^\circ\text{C}$ .                  | S-85 |
| Figure S67     | $^{29}\text{Si}$ NMR spectra of NaHMDS in DMEA cosolvent with varying amounts of DME added at $-120\text{ }^\circ\text{C}$ .                    | S-86 |
| Figure S68     | $^{29}\text{Si}$ NMR spectra of NaHMDS in pentane/toluene varying the concentration of DME at $-20\text{ }^\circ\text{C}$ .                     | S-87 |
| Figure S69     | $^{29}\text{Si}$ NMR spectra of NaHMDS in MTBE at $-110\text{ }^\circ\text{C}$ with incremental additions of 1:1 DME/12-crown-4.                | S-88 |
| <b>NIPA</b>    |                                                                                                                                                 |      |
| Figure S70     | $^{29}\text{Si}$ NMR spectra of NaHMDS in MTBE at $-110\text{ }^\circ\text{C}$ with incremental additions NIPA.                                 | S-89 |
| <b>PMDTA</b>   |                                                                                                                                                 |      |
| Figure S71.    | $^{13}\text{C}$ , $^{15}\text{N}$ , and $^{29}\text{Si}$ NMR spectra of NaHMDS with PMDTA in toluene cosolvent at $-80\text{ }^\circ\text{C}$ . | S-90 |
| Figure S72     | $^{29}\text{Si}$ NMR spectra of NaHMDS in toluene- $d_8$ varying PMDTA.                                                                         | S-91 |
| Figure S73.    | $^{13}\text{C}$ NMR spectrum highlighting PMDTA in the slow-exchange limit.                                                                     | S-92 |
| Figure S74.    | $^{13}\text{C}$ NMR spectra varying mole fractions of NaHMDS and NaTMDS in PMDTA with toluene $-80\text{ }^\circ\text{C}$ .                     | S-93 |
| Figure S75.    | $^{13}\text{C}$ NMR spectra of NaHMDS in 2:1 pentane/toluene with 2.0 equiv PMDTA varying [TMEDA] and [THF].                                    | S-94 |
| Figure S76.    | $^{29}\text{Si}$ NMR spectra of NaHMDS in MTBE with incremental additions of 1:1 PMDTA/HMPA and 1:1 PMDTA/12-crown-4.                           | S-95 |
| Figure S77.    | $^{29}\text{Si}$ NMR spectra of NaHMDS in MTBE with incremental additions of 1:1 PMDTA/DME and 1:1 PMDTA/diglyme.                               | S-96 |
| <b>Diglyme</b> |                                                                                                                                                 |      |
| Figure S78     | NMR spectra of 0.15 M $^{15}\text{N}$ NaHMDS in 0.45 M diglyme with DMEA cosolvent at $-120\text{ }^\circ\text{C}$ .                            | S-97 |
| Figure S79     | $^{13}\text{C}$ NMR spectra varying mole fractions of NaHMDS and NaTMDS in diglyme with toluene $-80\text{ }^\circ\text{C}$ .                   | S-98 |
| Figure S80     | $^{29}\text{Si}$ NMR spectra of NaHMDS in DMEA cosolvent with varying amounts of diglyme added at $-120\text{ }^\circ\text{C}$ .                | S-99 |

## 12-crown-4

|            |                                                                                                                                                  |       |
|------------|--------------------------------------------------------------------------------------------------------------------------------------------------|-------|
| Figure S81 | <sup>29</sup> Si NMR spectra of NaHMDS in MTBE cosolvent with varying amounts of 12-crown-4 added at –110 °C.                                    | S-100 |
| Figure S82 | <sup>29</sup> Si NMR spectra of NaHMDS in THF cosolvent with varying amounts of 12-crown-4 added at –105 °C.                                     | S-101 |
| Figure S83 | Titration of 12-crown-4 to a tube containing a 1:1 mix of NaHMDS and NaTMDS in MTBE cosolvent at –110 °C.                                        | S-102 |
| Figure S84 | <sup>29</sup> Si NMR spectra of NaHMDS in MTBE at –110 °C with incremental additions of 1:1 12-crown-4/15-crown-5 and 1:1 12-crown-4/18-crown-6. | S-103 |

## 15-crown-5

|            |                                                                                                                                             |       |
|------------|---------------------------------------------------------------------------------------------------------------------------------------------|-------|
| Figure S85 | <sup>29</sup> Si NMR spectra of NaHMDS in MTBE cosolvent with varying amounts of 15-crown-5 added at –110 °C.                               | S-104 |
| Figure S86 | <sup>13</sup> C NMR spectra varying mole fractions of NaHMDS and NaTMDS with 15-crown-5 in toluene cosolvent at –80 °C.                     | S-105 |
| Figure S87 | Titration of 15-crown-5 to a tube containing a 1:1 mix of NaHMDS and NaTMDS in MTBE cosolvent at –110 °C.                                   | S-106 |
| Figure S88 | <sup>29</sup> Si NMR spectra of 0.20 M [ <sup>15</sup> N]NaHMDS in MTBE at –110 °C with incremental additions of 1:1 15-crown-5/18-crown-6. | S-107 |
| Table S2   | Crystal structure connectivity for NaHMDS•15-crown5.                                                                                        | S-108 |

## 18-crown-6

|            |                                                                                                                         |       |
|------------|-------------------------------------------------------------------------------------------------------------------------|-------|
| Figure S89 | <sup>29</sup> Si NMR spectra of NaHMDS in MTBE cosolvent with varying amounts of 18-crown-6 added at –110 °C.           | S-109 |
| Figure S90 | Titration of 18-crown-6 to a tube containing a 1:1 mix of NaHMDS and NaTMDS in MTBE cosolvent at –110 °C.               | S-110 |
| Figure S91 | <sup>13</sup> C NMR spectra varying mole fractions of NaHMDS and NaTMDS with 18-crown-6 in toluene cosolvent at –80 °C. | S-111 |

## TDA-1

|            |                                                                                                         |       |
|------------|---------------------------------------------------------------------------------------------------------|-------|
| Figure S92 | <sup>29</sup> Si NMR spectra of NaHMDS in THF cosolvent with varying amounts of TDA-1 added at –105 °C. | S-112 |
|------------|---------------------------------------------------------------------------------------------------------|-------|

## [2.2.2]cryptand

|            |                                                                                                                   |       |
|------------|-------------------------------------------------------------------------------------------------------------------|-------|
| Figure S93 | <sup>29</sup> Si NMR spectra of NaHMDS in THF cosolvent with varying amounts of [2.2.2]cryptand added at –105 °C. | S-113 |
|------------|-------------------------------------------------------------------------------------------------------------------|-------|

|                   |                                                    |       |
|-------------------|----------------------------------------------------|-------|
| Table S3          | Crystal structure for NaHMDS•cryptand.             | S-114 |
| <b>Derivation</b> | Derivation for coupling constant fitting function. | S-117 |

---

## II. Computations: Coordinates and Energies

|           |                                                                                  |       |
|-----------|----------------------------------------------------------------------------------|-------|
| Table S4  | Geometric coordinates and single point energies for toluene.                     | S-120 |
| Table S5  | Geometric coordinates and single point energies for benzene.                     | S-121 |
| Table S6  | Geometric coordinates and single point energies for styrene.                     | S-122 |
| Table S7  | Geometric coordinates and single point energies for dimethylethylamine.          | S-123 |
| Table S8  | Geometric coordinates and single point energies for triethylamine.               | S-124 |
| Table S9  | Geometric coordinates and single point energies for pyrrolidine.                 | S-125 |
| Table S10 | Geometric coordinates and single point energies for <i>N</i> -methylpyrrolidine. | S-126 |
| Table S11 | Geometric coordinates and single point energies for pyridine.                    | S-127 |
| Table S12 | Geometric coordinates and single point energies for diethylether.                | S-128 |
| Table S13 | Geometric coordinates and single point energies for methyl <i>t</i> -butylether. | S-129 |
| Table S14 | Geometric coordinates and single point energies for methyl 1,4-dioxane.          | S-130 |
| Table S15 | Geometric coordinates and single point energies for THF.                         | S-131 |
| Table S16 | Geometric coordinates and single point energies for HMPA.                        | S-132 |
| Table S17 | Geometric coordinates and single point energies for DMPU.                        | S-133 |
| Table S18 | Geometric coordinates and single point energies for DMF.                         | S-134 |



|           |                                                                                                                                 |       |
|-----------|---------------------------------------------------------------------------------------------------------------------------------|-------|
| Table S19 | Geometric coordinates and single point energies for DMSO.                                                                       | S-135 |
| Table S20 | Geometric coordinates and single point energies for <i>N,N,N',N'</i> -tetramethylethylenediamine (TMEDA).                       | S-136 |
| Table S21 | Geometric coordinates and single point energies for <i>(1R,2R)-N,N,N',N'</i> -tetramethylcyclohexane-1,2-diamine ((R,R)-TMCDA). | S-137 |
| Table S22 | Geometric coordinates and single point energies for 2,2'-bipyridine (bipy).                                                     | S-138 |
| Table S23 | Geometric coordinates and single point energies for 1,2-dimethoxyethane (DME).                                                  | S-139 |
| Table S24 | Geometric coordinates and single point energies for <i>N,N,N',N'',N''</i> -nonamethylimidodiphosphoramidate (NIPA).             | S-140 |
| Table S25 | Geometric coordinates and single point energies for <i>N,N,N',N'',N''</i> -pentamethyldiethylenetriamine (PMDTA).               | S-142 |
| Table S26 | Geometric coordinates and single point energies for 1-methoxy-2-(2-methoxyethoxy)ethane (diglyme).                              | S-143 |
| Table S27 | Geometric coordinates and single point energies for 12-crown-4.                                                                 | S-144 |
| Table S28 | Geometric coordinates and single point energies for 15-crown-5                                                                  | S-145 |
| Table S29 | Geometric coordinates and single point energies for 18-crown-6.                                                                 | S-146 |
| Table S30 | Geometric coordinates and single point energies for TDA-1.                                                                      | S-147 |
| Table S31 | Geometric coordinates and single point energies for [2.2.2]-cryptand.                                                           | S-149 |
| Table S32 | Geometric coordinates and single point energies for NaHMDS unsolvated monomer.                                                  | S-151 |
| Table S33 | Geometric coordinates and single point energies for NaTMDS unsolvated monomer.                                                  | S-152 |
| Table S34 | Geometric coordinates and single point energies for NaCPTMDS unsolvated monomer.                                                | S-153 |
| Table S35 | Geometric coordinates and single point energies for NaDPTMDS unsolvated monomer.                                                | S-154 |
| Table S36 | Geometric coordinates and single point energies for NaHMDS unsolvated dimer.                                                    | S-156 |

|           |                                                                                                                                   |       |
|-----------|-----------------------------------------------------------------------------------------------------------------------------------|-------|
| Table S37 | Geometric coordinates and single point energies for NaTMDS unsolvated dimer.                                                      | S-158 |
| Table S38 | Geometric coordinates and single point energies for NaCPTMDS unsolvated dimer.                                                    | S-160 |
| Table S39 | Geometric coordinates and single point energies for NaDPTMDS unsolvated dimer.                                                    | S-162 |
| Table S40 | Geometric coordinates and single point energies for NaDPTMDS unsolvated dimer with phenyl rings over sodium.                      | S-164 |
| Table S41 | Geometric coordinates and single point energies for NaHMDS unsolvated trimer.                                                     | S-166 |
| Table S42 | Geometric coordinates and single point energies for $(\text{SiMe}_3)_2\text{-N-Na-N}(\text{SiMe}_3)_2$ anion piece of triple ion. | S-168 |
| Table S43 | Geometric coordinates and single point energies for $(\text{SiMe}_3)_2\text{N}$ anion piece of separated ion pair.                | S-170 |
| Table S44 | Geometric coordinates and single point energies for NaHMDS monosolvated toluene dimer.                                            | S-171 |
| Table S45 | Geometric coordinates and single point energies for NaHMDS disolvated toluene dimer.                                              | S-173 |
| Table S46 | Geometric coordinates and single point energies for NaHMDS disolvated benzene dimer.                                              | S-175 |
| Table S47 | Geometric coordinates and single point energies for NaHMDS disolvated styrene dimer.                                              | S-177 |
| Table S48 | Geometric coordinates and single point energies for NaHMDS disolvated DMEA dimer.                                                 | S-179 |
| Table S49 | Geometric coordinates and single point energies for NaHMDS disolvated triethylamine dimer.                                        | S-181 |
| Table S50 | Geometric coordinates and single point energies for NaHMDS disolvated <i>N</i> -methylpyrrolidine dimer.                          | S-183 |
| Table S51 | Geometric coordinates and single point energies for NaHMDS disolvated pyrrolidine dimer.                                          | S-185 |
| Table S52 | Geometric coordinates and single point energies for NaHMDS tetrasolvated pyrrolidine dimer.                                       | S-187 |
| Table S53 | Geometric coordinates and single point energies for NaHMDS disolvated pyrrolidine monomer.                                        | S-190 |
| Table S54 | Geometric coordinates and single point energies for NaHMDS trisolvated pyrrolidine monomer.                                       | S-192 |

|           |                                                                                                         |       |
|-----------|---------------------------------------------------------------------------------------------------------|-------|
| Table S55 | Geometric coordinates and single point energies for NaHMDS tetrasolvated pyrrolidine monomer.           | S-194 |
| Table S56 | Geometric coordinates and single point energies for NaHMDS disolvated pyridine dimer.                   | S-196 |
| Table S57 | Geometric coordinates and single point energies for NaHMDS tetrasolvated pyridine dimer.                | S-198 |
| Table S58 | Geometric coordinates and single point energies for NaHMDS disolvated pyridine monomer.                 | S-200 |
| Table S59 | Geometric coordinates and single point energies for NaHMDS trisolvated pyridine monomer.                | S-202 |
| Table S60 | Geometric coordinates and single point energies for NaHMDS tetrasolvated pyridine monomer.              | S-204 |
| Table S61 | Geometric coordinates and single point energies for NaHMDS disolvated Et <sub>2</sub> O dimer.          | S-206 |
| Table S62 | Geometric coordinates and single point energies for NaHMDS disolvated MTBE dimer.                       | S-208 |
| Table S63 | Geometric coordinates and single point energies for NaHMDS trisolvated MTBE monomer.                    | S-210 |
| Table S64 | Geometric coordinates and single point energies for NaHMDS disolvated 1,4-dioxane dimer.                | S-212 |
| Table S65 | Geometric coordinates and single point energies for NaHMDS tetrasolvated 1,4-dioxane dimer.             | S-214 |
| Table S66 | Geometric coordinates and single point energies for NaHMDS trisolvated monomer with 3 1,4-dioxane.      | S-217 |
| Table S67 | Geometric coordinates and single point energies for NaHMDS tetrasolvated monomer with four 1,4-dioxane. | S-219 |
| Table S68 | Geometric coordinates and single point energies for NaHMDS dimer with 1 THF and 1 toluene.              | S-221 |
| Table S69 | Geometric coordinates and single point energies for NaHMDS disolvated dimer with 2 THF.                 | S-223 |
| Table S70 | Geometric coordinates and single point energies for NaHMDS trisolvated dimer with 3 THF.                | S-225 |
| Table S71 | Geometric coordinates and single point energies for NaHMDS tetrasolvated dimer with 4 THF               | S-227 |
| Table S72 | Geometric coordinates and single point energies for NaHMDS trisolvated monomer with 3 THF.              | S-230 |

|           |                                                                                                 |       |
|-----------|-------------------------------------------------------------------------------------------------|-------|
| Table S73 | Geometric coordinates and single point energies for NaHMDS tetrasolvated monomer with 4 THF.    | S-232 |
| Table S74 | Geometric coordinates and single point energies for sodium cation with 5 THF's bound.           | S-234 |
| Table S75 | Geometric coordinates and single point energies for sodium cation with 6 THF's bound.           | S-236 |
| Table S76 | Geometric coordinates and single point energies for NaHMDS disolvated HMPA dimer.               | S-238 |
| Table S77 | Geometric coordinates and single point energies for NaHMDS disolvated HMPA monomer.             | S-241 |
| Table S78 | Geometric coordinates and single point energies for NaHMDS trisolvated HMPA monomer.            | S-243 |
| Table S79 | Geometric coordinates and single point energies for sodium cation solvated by 3 HMPA molecules. | S-246 |
| Table S80 | Geometric coordinates and single point energies for sodium cation solvated by 4 HMPA molecules. | S-248 |
| Table S81 | Geometric coordinates and single point energies for NaHMDS disolvated DMPU dimer.               | S-251 |
| Table S82 | Geometric coordinates and single point energies for NaHMDS disolvated DMPU monomer.             | S-254 |
| Table S83 | Geometric coordinates and single point energies for NaHMDS trisolvated DMPU monomer.            | S-256 |
| Table S84 | Geometric coordinates and single point energies for sodium cation solvated by 3 DMPU molecules. | S-258 |
| Table S85 | Geometric coordinates and single point energies for sodium cation solvated by 4 DMPU molecules. | S-260 |
| Table S86 | Geometric coordinates and single point energies for NaHMDS disolvated DMF dimer.                | S-262 |
| Table S87 | Geometric coordinates and single point energies for NaHMDS tetrasolvated DMF dimer.             | S-264 |
| Table S88 | Geometric coordinates and single point energies for NaHMDS disolvated DMF monomer.              | S-267 |
| Table S89 | Geometric coordinates and single point energies for NaHMDS trisolvated DMF monomer.             | S-269 |
| Table S90 | Geometric coordinates and single point energies for NaHMDS tetrasolvated DMF monomer.           | S-271 |

|            |                                                                                                 |       |
|------------|-------------------------------------------------------------------------------------------------|-------|
| Table S91  | Geometric coordinates and single point energies for sodium cation solvated by 4 DMF molecules.  | S-273 |
| Table S92  | Geometric coordinates and single point energies for sodium cation solvated by 5 DMF molecules.  | S-275 |
| Table S93  | Geometric coordinates and single point energies for sodium cation solvated by 6 DMF molecules.  | S-277 |
| Table S94  | Geometric coordinates and single point energies for NaHMDS disolvated DMSO dimer.               | S-279 |
| Table S95  | Geometric coordinates and single point energies for NaHMDS tetrasolvated DMSO dimer.            | S-281 |
| Table S96  | Geometric coordinates and single point energies for NaHMDS disolvated DMSO monomer.             | S-283 |
| Table S97  | Geometric coordinates and single point energies for NaHMDS trisolvated DMSO monomer.            | S-285 |
| Table S98  | Geometric coordinates and single point energies for NaHMDS tetrasolvated DMSO monomer.          | S-287 |
| Table S99  | Geometric coordinates and single point energies for sodium cation solvated by 3 DMSO molecules. | S-289 |
| Table S100 | Geometric coordinates and single point energies for sodium cation solvated by 4 DMSO molecules. | S-290 |
| Table S101 | Geometric coordinates and single point energies for sodium cation solvated by 5 DMSO molecules. | S-292 |
| Table S102 | Geometric coordinates and single point energies for NaHMDS TMEDA disolvated dimer.              | S-294 |
| Table S103 | Geometric coordinates and single point energies for NaHMDS TMEDA monosolvated monomer.          | S-297 |
| Table S104 | Geometric coordinates and single point energies for LiHMDS TMEDA monosolvated monomer.          | S-299 |
| Table S105 | Geometric coordinates and single point energies for NaHMDS TMEDA disolvated monomer.            | S-301 |
| Table S106 | Geometric coordinates and single point energies for NaHMDS (R,R)-TMCDA disolvated dimer.        | S-303 |
| Table S107 | Geometric coordinates and single point energies for NaHMDS (R,R)-TMCDA monosolvated dimer.      | S-306 |
| Table S108 | Geometric coordinates and single point energies for NaHMDS (R,R)-TMCDA monosolvated monomer.    | S-308 |

|            |                                                                                                       |       |
|------------|-------------------------------------------------------------------------------------------------------|-------|
| Table S109 | Geometric coordinates and single point energies for LiHMDS (R,R)-TMEDA monosolvated monomer.          | S-310 |
| Table S110 | Geometric coordinates and single point energies for NaHMDS bipy disolvated dimer.                     | S-312 |
| Table S111 | Geometric coordinates and single point energies for NaHMDS bipy monosolvated open dimer.              | S-314 |
| Table S112 | Geometric coordinates and single point energies for NaHMDS bipy disolvated monomer.                   | S-316 |
| Table S113 | Geometric coordinates and single point energies for NaHMDS DME disolvated dimer.                      | S-318 |
| Table S114 | Geometric coordinates and single point energies for NaHMDS DME monosolvated monomer.                  | S-320 |
| Table S115 | Geometric coordinates and single point energies for NaHMDS DME disolvated monomer.                    | S-322 |
| Table S116 | Geometric coordinates and single point energies for sodium cation with 3 DME molecules.               | S-324 |
| Table S117 | Geometric coordinates and single point energies for NaHMDS NIP disolvated dimer.                      | S-326 |
| Table S118 | Geometric coordinates and single point energies for NaHMDS NIPA monosolvated monomer.                 | S-329 |
| Table S119 | Geometric coordinates and single point energies for NaHMDS NIPA disolvated monomer.                   | S-331 |
| Table S120 | Geometric coordinates and single point energies for sodium cation solvated by 2 NIPA molecules.       | S-334 |
| Table S121 | Geometric coordinates and single point energies for sodium cation solvated by 3 NIPA molecules.       | S-336 |
| Table S122 | Geometric coordinates and single point energies for NaHMDS PMDTA disolvated dimer.                    | S-339 |
| Table S123 | Geometric coordinates and single point energies for NaHMDS PMDTA/toluene mixed disolvated open dimer. | S-342 |
| Table S124 | Geometric coordinates and single point energies for NaHMDS PMDTA monosolvated monomer.                | S-345 |
| Table S125 | Geometric coordinates and single point energies for sodium cation solvated by 2 equivalents of PMDTA. | S-347 |
| Table S126 | Geometric coordinates and single point energies for NaHMDS diglyme disolvated dimer.                  | S-349 |

|            |                                                                                                                             |       |
|------------|-----------------------------------------------------------------------------------------------------------------------------|-------|
| Table S127 | Geometric coordinates and single point energies for NaHMDS diglyme monosolvated monomer.                                    | S-352 |
| Table S128 | Geometric coordinates and single point energies for sodium cation solvated by 2 equivalents of diglyme.                     | S-354 |
| Table S129 | Geometric coordinates and single point energies for sodium cation solvated by 2 equivalents of 12-crown-4.                  | S-356 |
| Table S130 | Geometric coordinates and single point energies for NaHMDS 12-crown-4 monosolvated monomer.                                 | S-358 |
| Table S131 | Geometric coordinates and single point energies for NaHMDS 15-crown-5 monosolvated monomer.                                 | S-360 |
| Table S132 | Geometric coordinates and single point energies for sodium cation solvated by 2 equivalents of 15-crown-5.                  | S-362 |
| Table S133 | Geometric coordinates and single point energies for sodium cation solvated by 1 equivalent of 18-crown-6.                   | S-364 |
| Table S134 | Geometric coordinates and single point energies for NaHMDS 18-crown-6 monosolvated monomer.                                 | S-366 |
| Table S135 | Geometric coordinates and single point energies for NaHMDS TDA-1 monosolvated monomer.                                      | S-368 |
| Table S136 | Geometric coordinates and single point energies for sodium cation solvated by 1 equivalent of TDA-1.                        | S-370 |
| Table S137 | Geometric coordinates and single point energies for sodium cation solvated by 1 equivalent of [2.2.2]cryptand.              | S-372 |
| Table S138 | Geometric coordinates and single point energies for sodium cation solvated by 1 equivalent PMDTA and 1 equivalent of HMPA.  | S-374 |
| Table S139 | Geometric coordinates and single point energies for sodium cation solvated by 1 equivalent PMDTA and 2 equivalents of HMPA. | S-376 |
| Table S140 | Geometric coordinates and single point energies for sodium cation solvated by 1 equivalent PMDTA and 1 equivalents of DMPU. | S-378 |
| Table S141 | Geometric coordinates and single point energies for sodium cation solvated by 1 equivalent PMDTA and 2 equivalents of DMPU. | S-380 |
| Table S142 | Geometric coordinates and single point energies for unsolvated sodium cation.                                               | S-382 |
| Table S143 | Geometric coordinates and single point energies for NaTMDS toluene disolvated dimer.                                        | S-383 |
| Table S144 | Geometric coordinates and single point energies for NaHMDS/NaTMDS heterodimer with 2 equivalents of toluene bound.          | S-385 |

|            |                                                                                                                                |       |
|------------|--------------------------------------------------------------------------------------------------------------------------------|-------|
| Table S145 | Geometric coordinates and single point energy for sodium cation with 4 THF's bound.                                            | S-387 |
| Table S146 | Geometric coordinates and single point energies for NaHMDS TMEDA disolvated monomer with $\kappa^2$ - $\kappa^1$ connectivity. | S-389 |



**Table S1.** Spectroscopic and computational data for NaHMDS dimers and monomers in different solvents.

| Entry    | Solvent                     | Structure<br>( $A_mS_n$ (#)) | $^{13}\text{C}$ -Si<br>shifts<br>(ppm) | $^{15}\text{N}$<br>shifts<br>(ppm) | $^{29}\text{Si}$ shifts<br>(ppm ( $^1J_{\text{N-Si}}$ )) | Solvation<br>Energy per S-<br>Na (kcal/mol) |
|----------|-----------------------------|------------------------------|----------------------------------------|------------------------------------|----------------------------------------------------------|---------------------------------------------|
| <b>a</b> | toluene                     | $A_2S_2$ ( <b>12a</b> )      | 6.8                                    | 47.0                               | -14.4 (7.9)                                              | -1.6                                        |
| <b>b</b> | benzene                     | $A_2S_2$ ( <b>12b</b> )      | 6.9                                    | 47.0                               | -14.2 (7.8)                                              | -2.3                                        |
| <b>c</b> | styrene                     | $A_2S_2$ ( <b>12c</b> )      | 6.8                                    | 47.5                               | -14.3 (7.8)                                              | -1.5                                        |
| <b>d</b> | DMEA                        | $A_2S_2$ ( <b>12d</b> )      | 6.5                                    | 46.2                               | -15.7 (8.7)                                              | -5.9                                        |
| <b>e</b> | Et <sub>3</sub> N           | $A_2S_2$ ( <b>12e</b> )      | 6.5                                    | 46.6                               | -14.5 (7.6)                                              | -4.1                                        |
| <b>f</b> | <i>N</i> -Me-pyrrolidine    | $A_2S_2$ ( <b>12f</b> )      | -                                      | -                                  | -15.5 (8.7)                                              | -6.7                                        |
| <b>g</b> | pyridine                    | $A_2S_2$ ( <b>12g</b> )      | 6.6                                    | 44.4                               | -15.4 (8.8)                                              | -7.3                                        |
|          |                             | $AS_3$ ( <b>13g</b> )        | 6.8                                    | 47.6                               | -20.7 (13.0)                                             | -5.5                                        |
| <b>h</b> | pyrrolidine                 | $A_2S_2$ ( <b>12h</b> )      | -                                      | -                                  | -15.5 (9.2)                                              | -8.6                                        |
|          |                             | $AS_4$ ( <b>13h</b> )        | -                                      | -                                  | -19.7 (11.1)                                             | -7.4                                        |
| <b>i</b> | Et <sub>2</sub> O           | $A_2S_2$ ( <b>12i</b> )      | 6.4                                    | 49.4                               | -15.5 (8.3)                                              | -5.0                                        |
| <b>j</b> | MTBE                        | $A_2S_2$ ( <b>12j</b> )      | 6.8                                    | 47.4                               | -15.6 (8.8)                                              | -7.7                                        |
| <b>k</b> | 1,4-dioxane                 | $A_2S_2$ ( <b>12k</b> )      | -                                      | -                                  | -                                                        | -6.5                                        |
|          |                             | $AS_3$ ( <b>13k</b> )        | -                                      | -                                  | -                                                        | -6.0                                        |
| <b>l</b> | 1,3-dioxolane               | $A_2S_2$ ( <b>12l</b> )      | -                                      | -                                  | -16.0 (8.6)                                              | -                                           |
|          |                             | $AS_4$ ( <b>13l</b> )        | -                                      | -                                  | -21.1 (13.0)                                             | -                                           |
| <b>m</b> | THF                         | $A_2S_2$ ( <b>12m</b> )      | 6.3                                    | 45.3                               | -15.8 (8.7)                                              | -6.7                                        |
|          |                             | $AS_4$ ( <b>13m</b> )        | 6.5                                    | 49.0                               | -21.7 (13.3)                                             | -5.5                                        |
| <b>n</b> | HMPA                        | $A_2S_2$ ( <b>12n</b> )      | -                                      | -                                  | -16.5 (9.8)                                              | -13.6                                       |
|          |                             | $AS_3$ ( <b>13n</b> )        | -                                      | -                                  | -23.7 (13.4)                                             | -11.46                                      |
| <b>o</b> | DMPU                        | $A_2S_2$ ( <b>12o</b> )      | -                                      | -                                  | -16.4                                                    | -10.9                                       |
|          |                             | $AS_2$ ( <b>13o</b> )        | -                                      | -                                  | -22.5 (13.6)                                             | -13.1                                       |
| <b>p</b> | DMF                         | $A_2S_4$ ( <b>12p</b> )      | -                                      | -                                  | -                                                        | -8.2                                        |
|          |                             | $AS_4$ ( <b>13p</b> )        | -                                      | -                                  | -22.4 (13.7)                                             | -9.3                                        |
| <b>q</b> | DMSO                        | $A_2S_4$ ( <b>12q</b> )      | -                                      | -                                  | -                                                        | -6.5                                        |
|          |                             | $AS_3$ ( <b>13q</b> )        | -                                      | -                                  | -20.0 (12.4)                                             | -10.1                                       |
| <b>r</b> | TMEDA                       | $A_2S_2$ ( <b>12r</b> )      | 8.7                                    | -                                  | -14.2 (5.8)                                              | -7.4                                        |
|          |                             | $AS_2$ ( <b>13r</b> )        | 8.1                                    | -                                  | -21.0 (11.3)                                             | -9.5                                        |
| <b>s</b> | ( <i>R,R</i> )-TMCDA        | $A_2SS'$ ( <b>15s</b> )      | -                                      | -                                  | -15.7 (7.7)                                              | -11.0                                       |
|          |                             |                              |                                        |                                    | -14.7 (7.1)                                              |                                             |
| <b>t</b> | (-)-sparteine ( <b>25</b> ) | -                            | -                                      | -                                  | -                                                        | -                                           |

|           |                            |                                              |     |      |              |       |
|-----------|----------------------------|----------------------------------------------|-----|------|--------------|-------|
| <b>u</b>  | bipy                       | A <sub>2</sub> S ( <b>26u</b> )              | –   | –    | –16.2 (8.8)  | –     |
|           |                            |                                              | –   | –    | –20.5 (12.5) | –     |
| <b>v</b>  | DME                        | A <sub>2</sub> S <sub>2</sub> ( <b>12u</b> ) | –   | –    | –15.5 (7.8)  | –13.2 |
|           |                            | A <sub>2</sub> S <sub>2</sub> ( <b>12v</b> ) | –   | –    | –14.8 (7.6)  | –9.6  |
| <b>w</b>  | PMDTA                      | AS <sub>2</sub> ( <b>13v</b> )               |     | 46.5 | –21.4 (13.7) | –11.7 |
|           |                            | AS ( <b>13w</b> )                            | 7.8 | 48.8 | –22.7 (13.7) | –25.7 |
| <b>x</b>  | diglyme                    | AS ( <b>13x</b> )                            | 6.5 | 49.7 | –21.3 (12.7) | –23.4 |
| <b>y</b>  | 12-crown-4                 | AS ( <b>13y</b> )                            | –   | –    | –22.4 (13.7) | –18.7 |
| <b>z</b>  | 15-crown-5                 | AS ( <b>13z</b> )                            | –   | –    | –22.1 (13.0) | –29.4 |
| <b>aa</b> | 18-crown-6                 | A <sub>2</sub> S ( <b>16aa</b> )             | –   | –    | –22.3 (13.6) | –     |
|           |                            | AS ( <b>13aa</b> )                           | –   | –    | –21.6 (12.3) | –28.8 |
| <b>bb</b> | TDA-1 ( <b>31</b> )        | A <sub>2</sub> S ( <b>16bb</b> )             | –   | –    | –20.5 (13.5) | –     |
|           |                            | AS ( <b>13bb</b> )                           | –   | –    | –19.7 (12.8) | –23.8 |
| <b>cc</b> | [2.2.2]crypt ( <b>32</b> ) | A <sub>2</sub> S ( <b>16cc</b> )             | –   | –    | –20.5 (13.5) | –     |
|           |                            | AS ( <b>14cc</b> )                           | –   | –    | –27.2        | –     |

## **I. NMR Spectroscopic Data and Computed Free Energies**

**Toluene (entry a):**

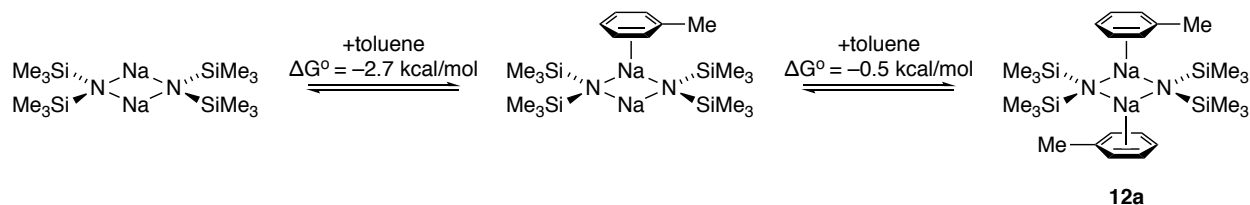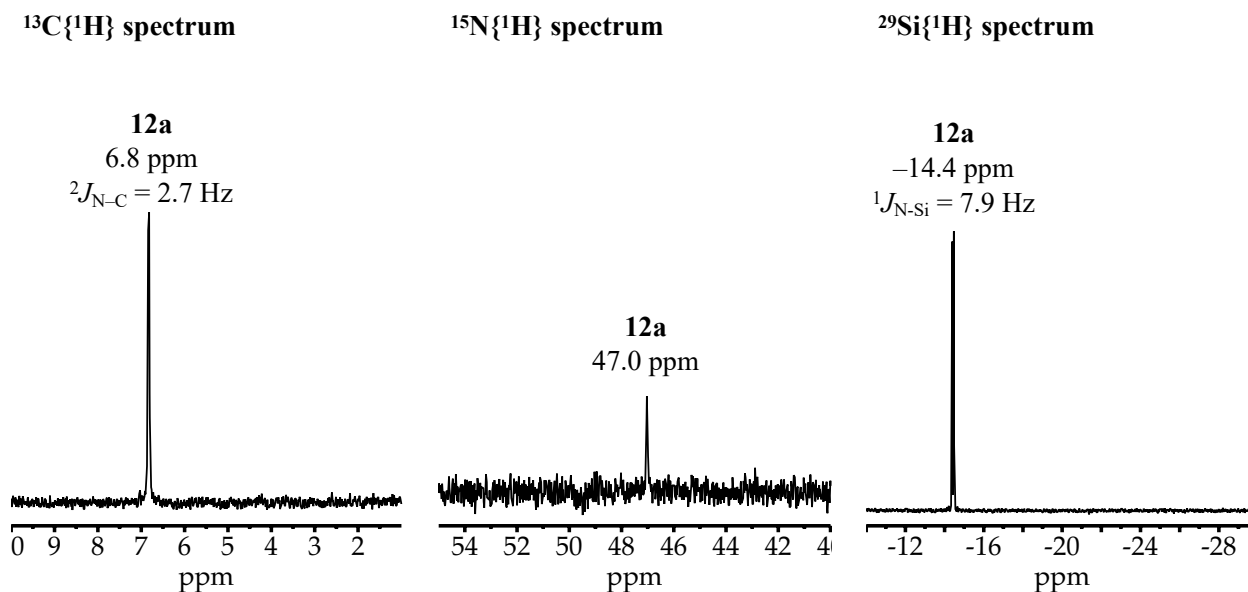

**Figure S1.** NMR spectra of 0.10 [<sup>15</sup>N]NaHMDS in 2:1 pentane/toluene-*d*<sub>8</sub> at 25 °C. <sup>13</sup>C and <sup>29</sup>Si spectra are referenced to a TMS internal standard (TMS chemical shift = 0.0 ppm for each).

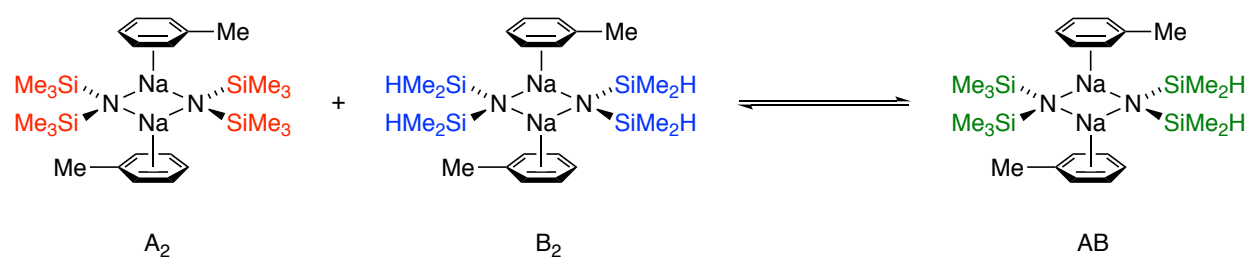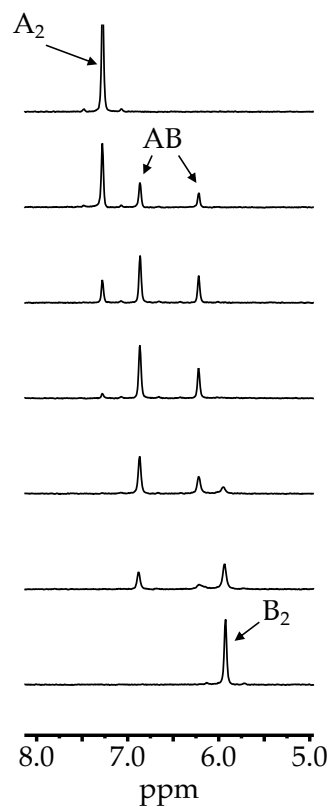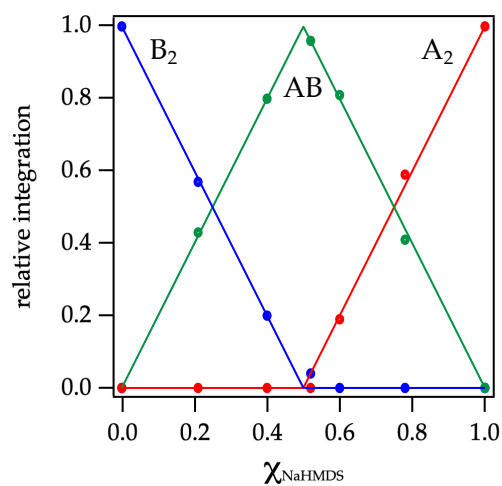

**Figure S2.**  $^{13}\text{C}$  NMR spectra and affiliated Job plot showing relative integrations of NaHMDS-derived homodimer ( $\text{A}_2$ , red), NaTMDS-derived homodimer ( $\text{B}_2$ , blue), and heterodimer ( $\text{AB}$ , green) versus the measured mole fraction of NaHMDS ( $\chi_{\text{NaHMDS}}$ ) at 0.30 total molarity in neat toluene at  $-80^\circ\text{C}$ .

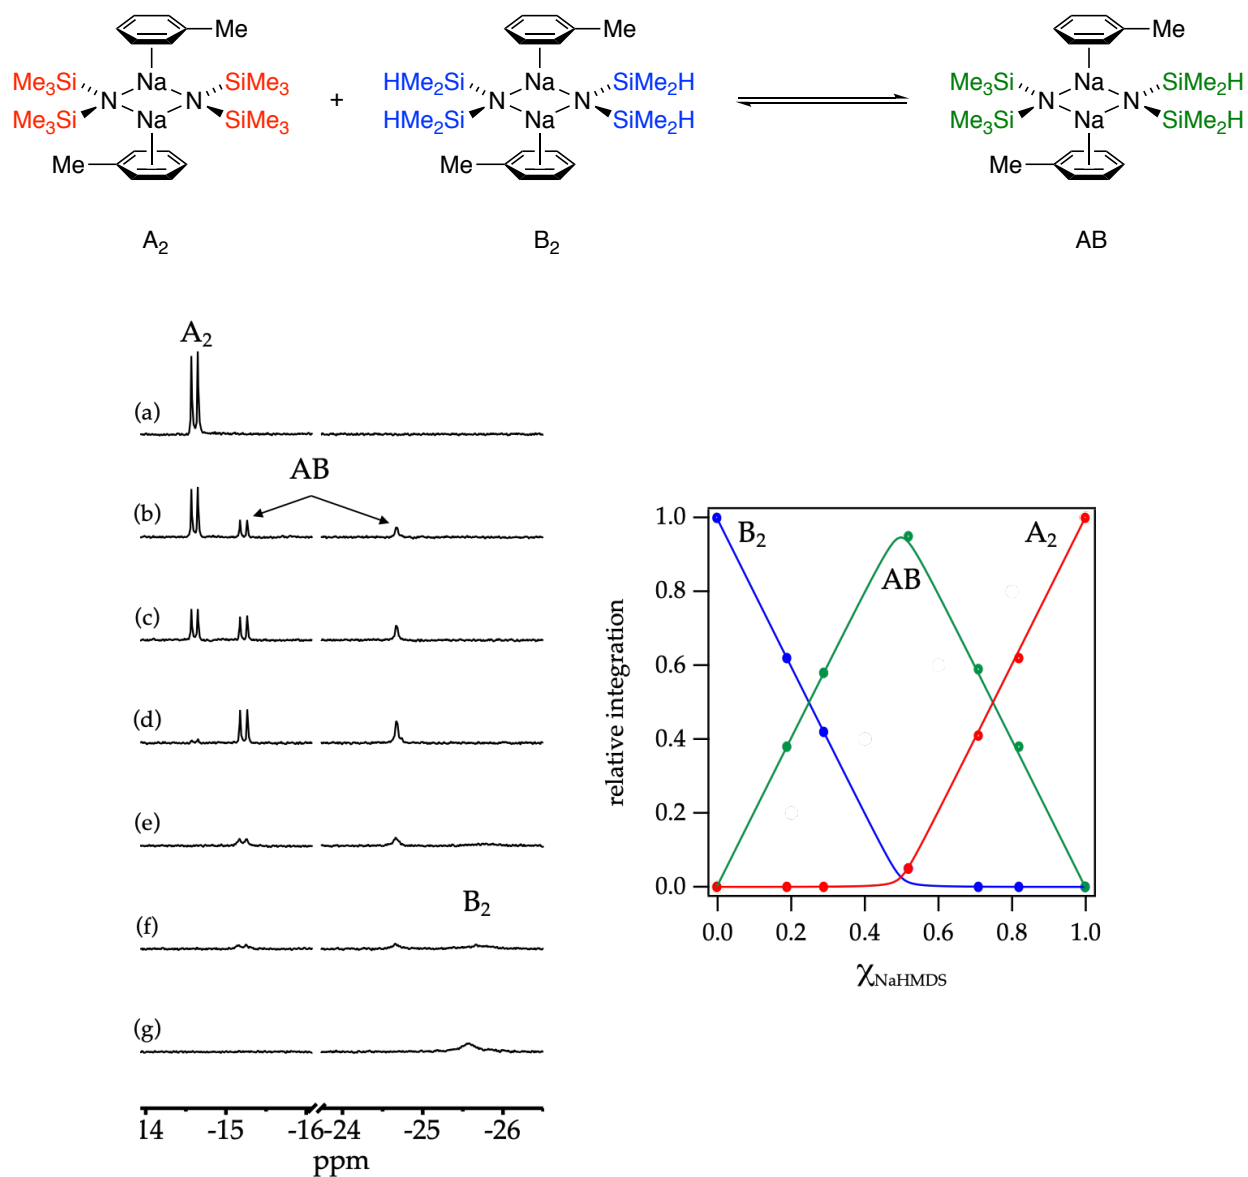

**Figure S3.** <sup>29</sup>Si{<sup>1</sup>H} NMR spectra and affiliated Job plot showing relative integrations of NaHMDS-derived homodimer (A<sub>2</sub>, red), NaTMDS-derived homodimer (B<sub>2</sub>, blue), and heterodimer (AB, green) versus the measured mole fraction of NaHMDS ( $X_{\text{NaHMDS}}$ ) at 0.20 total molarity in neat toluene at  $-80$  °C. The measured mole fractions,  $X_{\text{NaHMDS}}$ , in (a)–(g) are 1.00, 0.81, 0.71, 0.52, 0.29, 0.19, and 0.00, respectively.

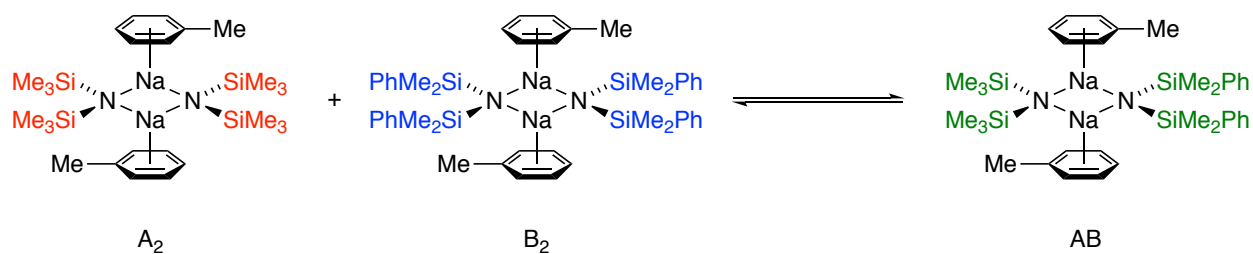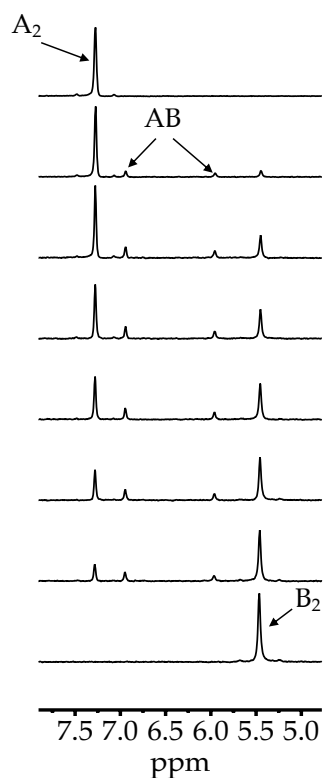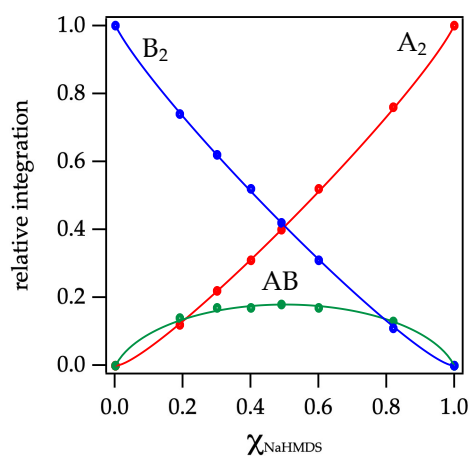

**Figure S4.** Job plot showing relative integrations of the  $^{13}\text{C}$  resonances of NaHMDS homodimer ( $A_2$ , red), NaDPTMDS-derived homodimer ( $B_2$ , blue), and heterodimer ( $AB$ , green) versus the measured mole fraction of NaHMDS ( $X_{\text{NaHMDS}}$ ) at 0.30 total molarity in neat toluene at  $-80^\circ\text{C}$ .

**Benzene (entry b):**

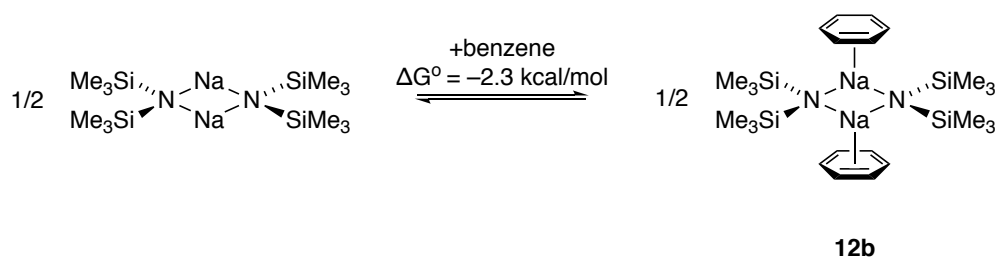

$^{13}\text{C}\{^1\text{H}\}$  spectrum

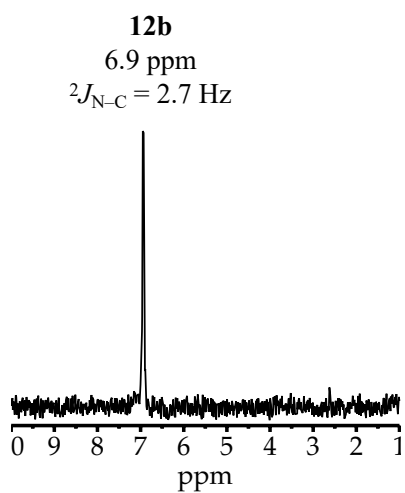

$^{15}\text{N}\{^1\text{H}\}$  spectrum

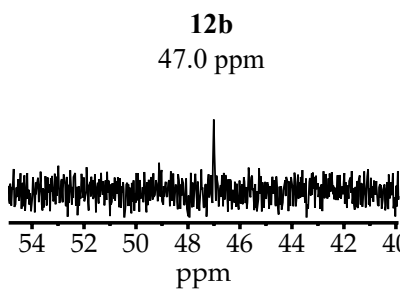

$^{29}\text{Si}\{^1\text{H}\}$  spectrum

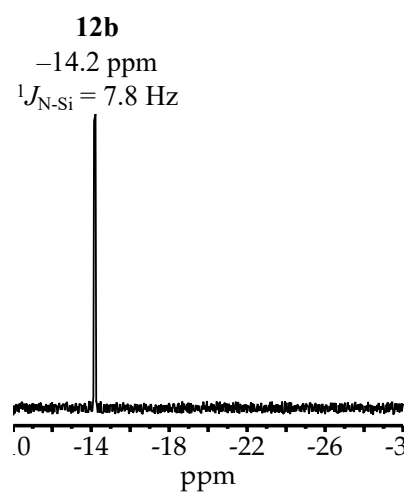

**Figure S5.** NMR spectra of 0.10  $[^{15}\text{N}]\text{NaHMDS}$  in benzene at 25 °C. (TMS chemical shift = 0.0 ppm for each).



**Styrene (entry c):**

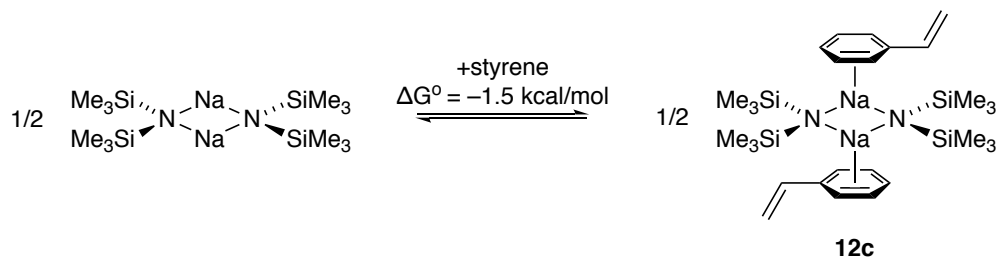

$^{13}\text{C}\{^1\text{H}\}$  spectrum

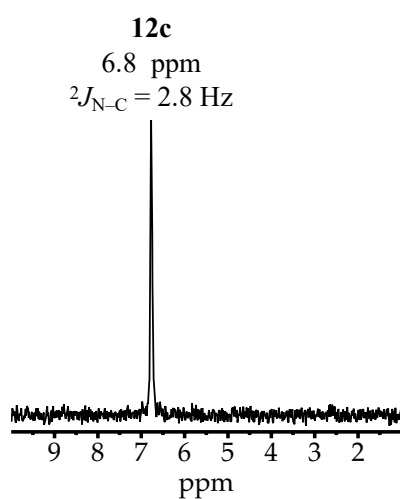

$^{15}\text{N}\{^1\text{H}\}$  spectrum

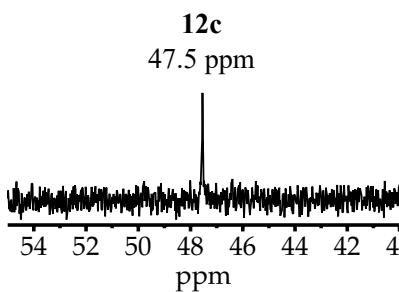

$^{29}\text{Si}\{^1\text{H}\}$  spectrum

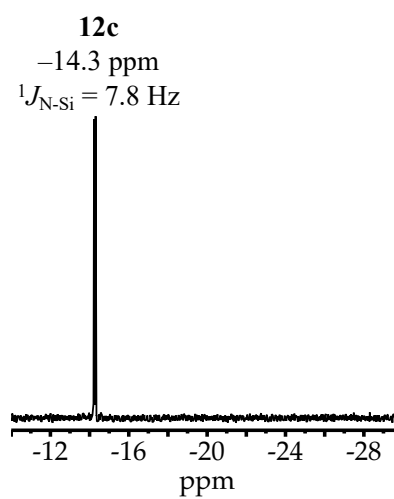

**Figure S6.** NMR spectra of 0.10 M  $^{15}\text{N}$ NaHMDS in styrene at 25 °C. (TMS chemical shift = 0.0 ppm for each).

**DMEA (entry d):**

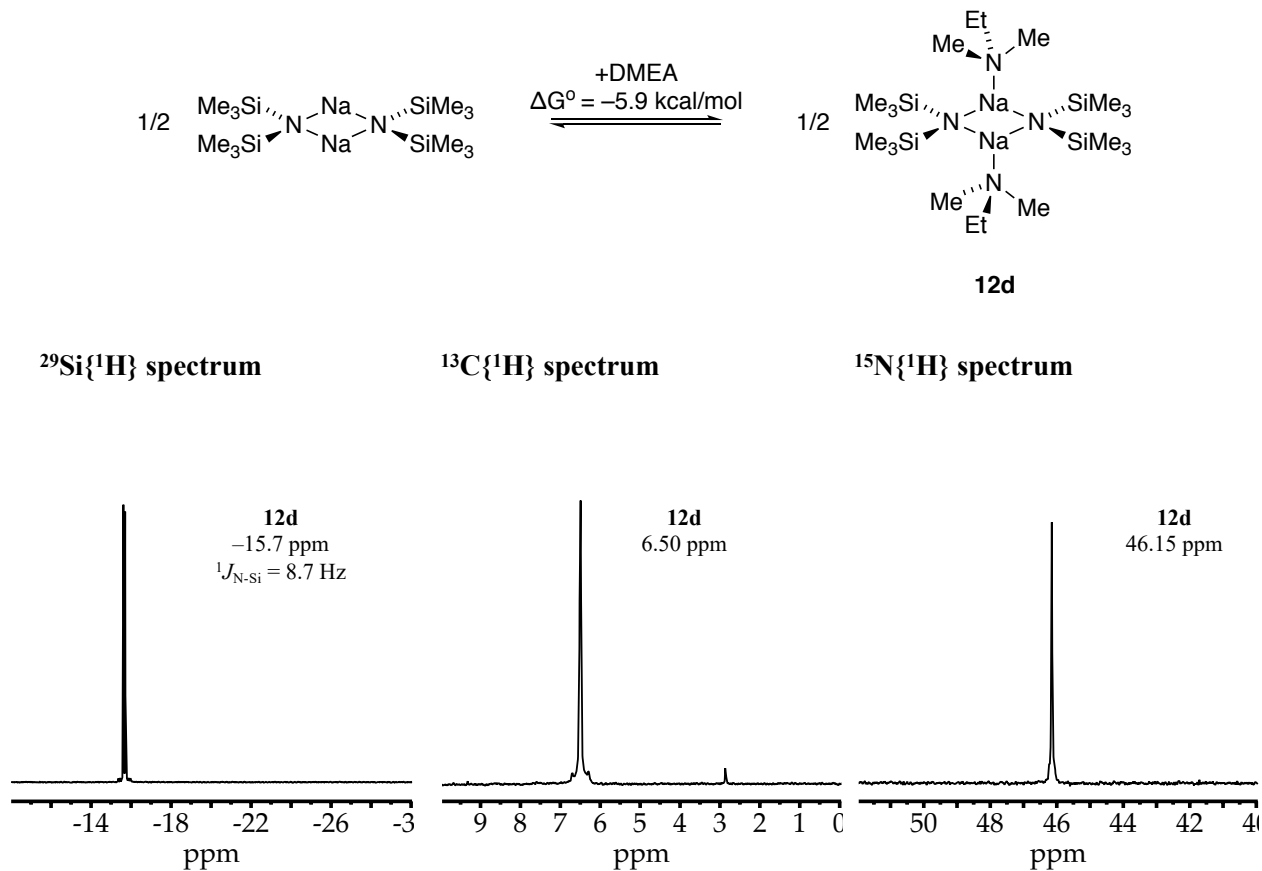

**Figure S7.** NMR spectra of  $^{15}\text{N}$ NaHMDS in neat DMEA at  $-120^\circ\text{C}$ . Concentrations vary from 0.20 M NaHMDS ( $^{15}\text{N}$  and  $^{29}\text{Si}$ ) to 0.30 M NaHMDS ( $^{13}\text{C}$ ).  $^{13}\text{C}$  spectrum is referenced to cyclopentane internal standard (26.05 ppm).  $^{15}\text{N}$  is referenced to DMEA (25.70 ppm).  $^{29}\text{Si}$  is referenced to TMS internal standard (0.00 ppm).

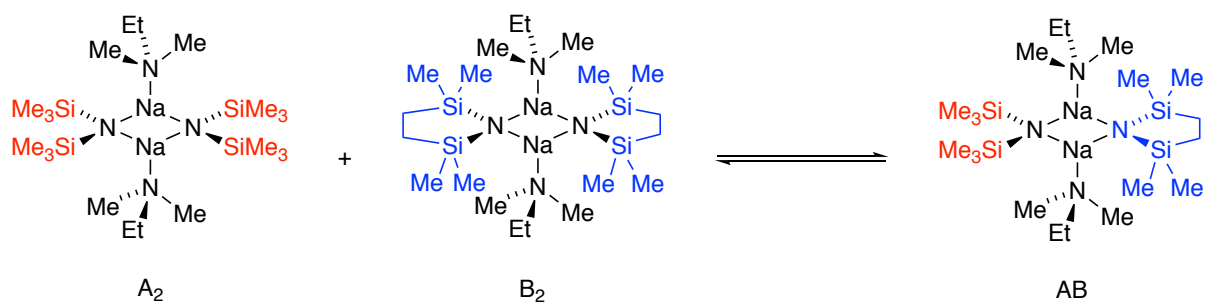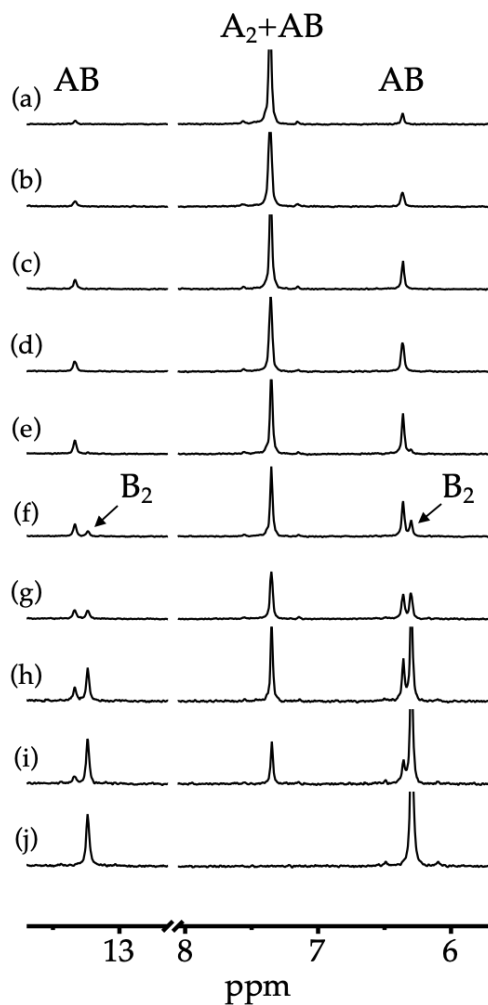

**Figure S8.**  $^{13}\text{C}$  NMR spectra of with mixing NaHMDS and cyclopentyl-derived sodium disilazide **20** at 0.10 total molarity in 0.15 M DMEA in toluene- $d_8$  cosolvent at  $-80^\circ\text{C}$ . Addition of DMEA was necessary to dissolve **20** which is insoluble in neat toluene.  $^{13}\text{C}$  spectra are referenced relative the toluene ipso-carbon chemical shift (137.86 ppm).

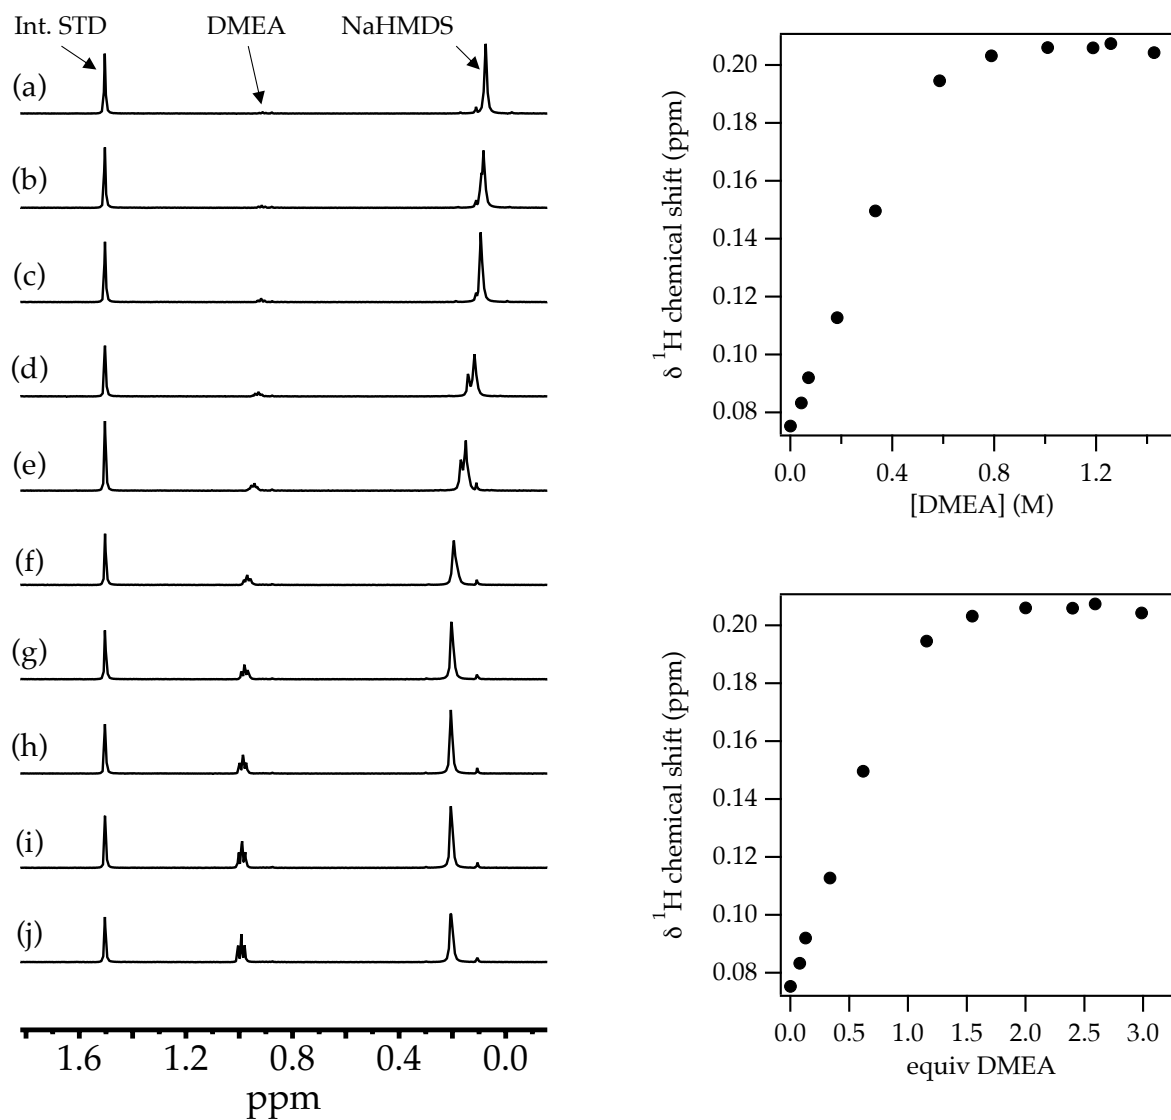

**Figure S9.**  $^1\text{H}$  NMR spectra for 0.56 M solutions of NaHMDS in toluene with cyclopentane internal standard varying DMEA at 25 °C. The equivalents of THF in (a)–(j) are 0.00, 0.08, 0.13, 0.34, 0.61, 1.15, 1.54, 2.00, 2.40, 2.59, and 2.98, respectively. Plots of chemical shift affiliated with 0.56 M solutions of NaHMDS in toluene with cyclopentane internal standard (1.51 ppm) varying DMEA at 25 °C.

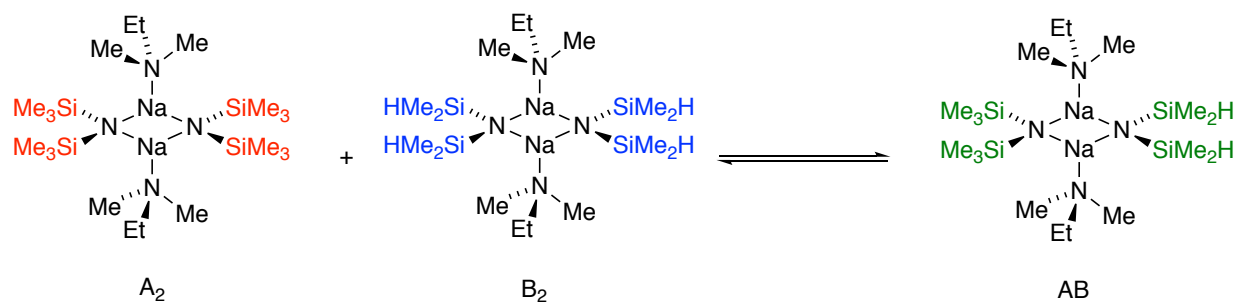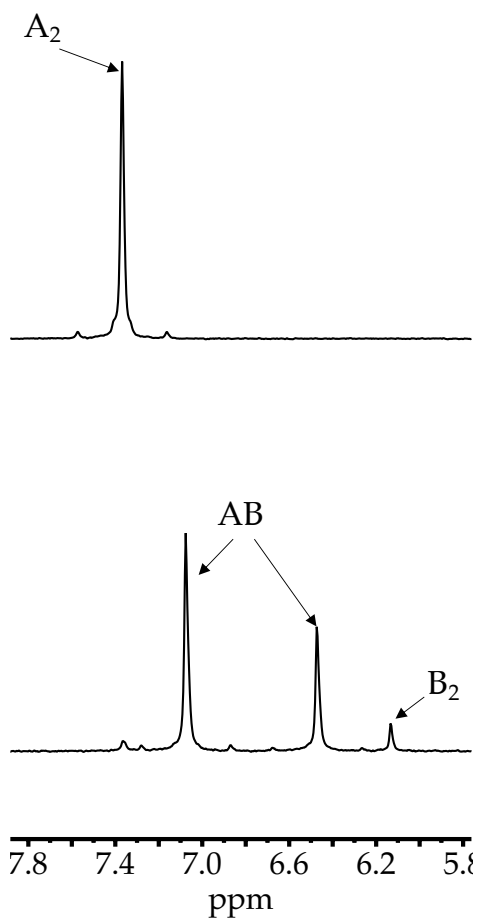

**Figure S10.**  $^{13}\text{C}$  NMR spectra of mixing NaHMDS and NaTMDS at 0.20 total molarity in 0.50 M DMEA in toluene- $d_8$  cosolvent at  $-80^\circ\text{C}$ . The measured mole fractions,  $X_{\text{NaHMDS}}$ , in (a) and (b) are 1.00 and 0.51, respectively.  $^{13}\text{C}$  spectra are referenced relative the toluene ipso-carbon chemical shift (137.86 ppm).

**Triethylamine (entry e):**

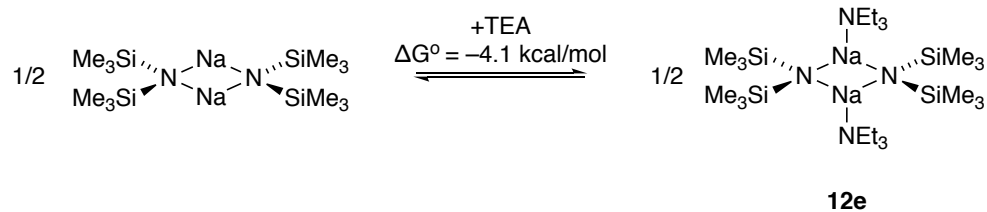

**$^{29}\text{Si}\{^1\text{H}\}$  spectrum**

**$^{13}\text{C}\{^1\text{H}\}$  spectrum**

**$^{15}\text{N}\{^1\text{H}\}$  spectrum**

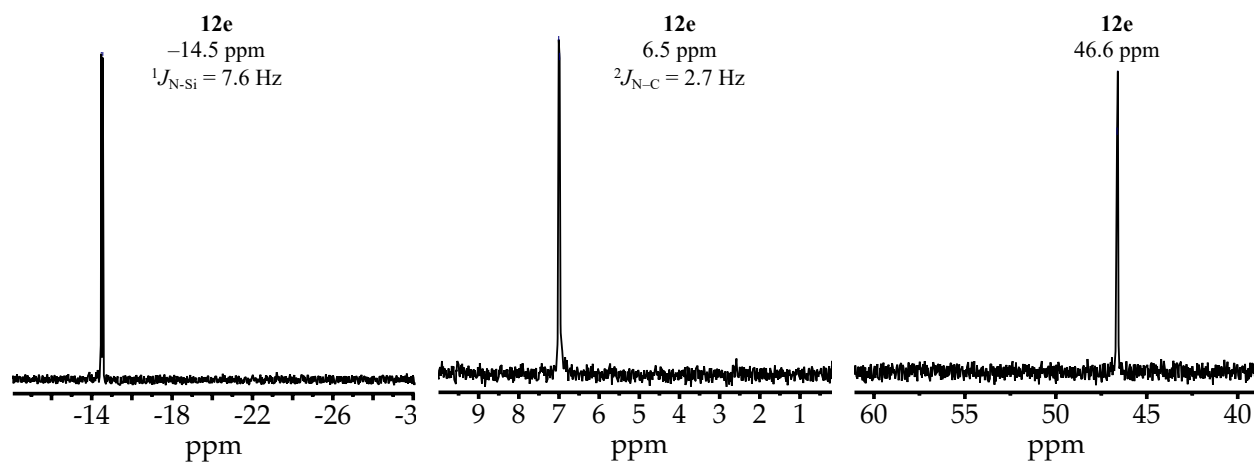

**Figure S11.** NMR spectra of 0.10 M  $^{15}\text{N}$ NaHMDS in neat triethylamine at 25 °C.  $^{13}\text{C}$  and  $^{29}\text{Si}$  spectra are referenced to TMS internal standard (0.00 ppm).

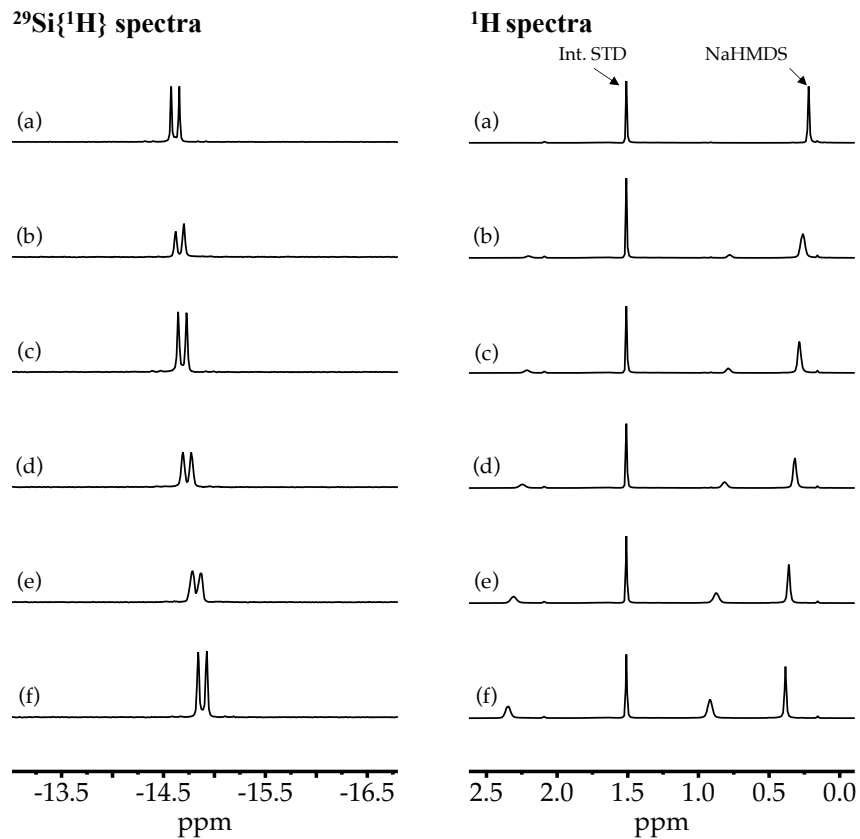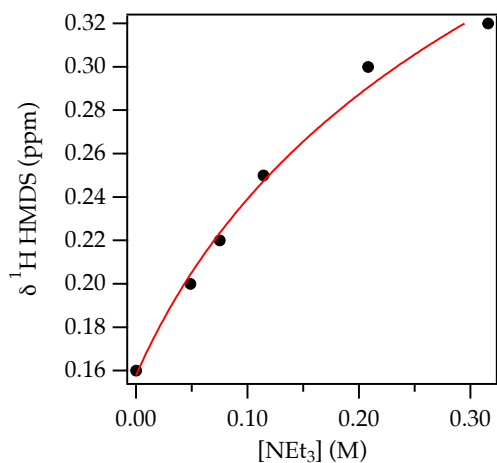

**Figure S12.**  $^1\text{H}$  and  $^{29}\text{Si}$  NMR spectra for 0.19 M solutions of NaHMDS in toluene with cyclopentane internal standard (1.51 ppm) varying triethylamine concentration at  $-80\text{ }^\circ\text{C}$ . The concentration of triethylamine in (a)–(f) are 0.00, 0.05, 0.08, 0.11, 0.21, and 0.31, respectively. The plot shown corresponds to the spectra above.

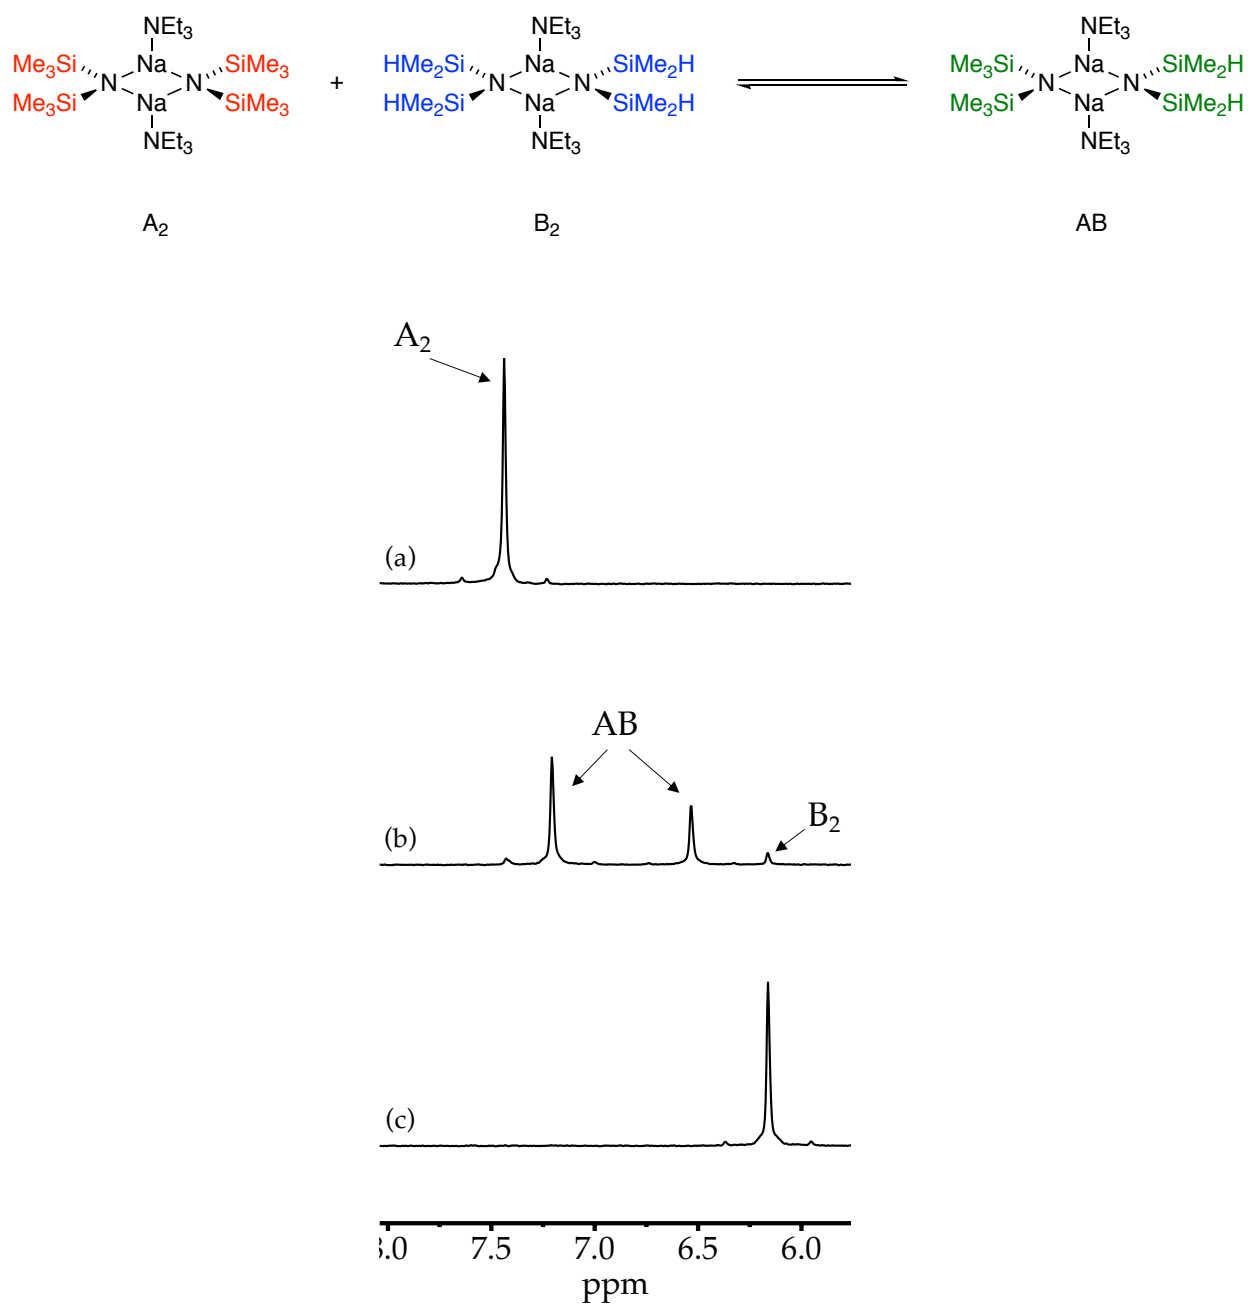

**Figure S13.**  $^{13}\text{C}$  NMR spectra of with mixing NaHMDS and NaTMDS at 0.20 total molarity in 0.50 M triethylamine in toluene- $d_8$  cosolvent at  $-80^\circ\text{C}$ . The measured mole fractions,  $X_{\text{NaHMDS}}$ , in (a)–(c) are 1.00, 0.50, and 0.00, respectively.  $^{13}\text{C}$  spectra are referenced relative the toluene ipso-carbon chemical shift (137.86 ppm).



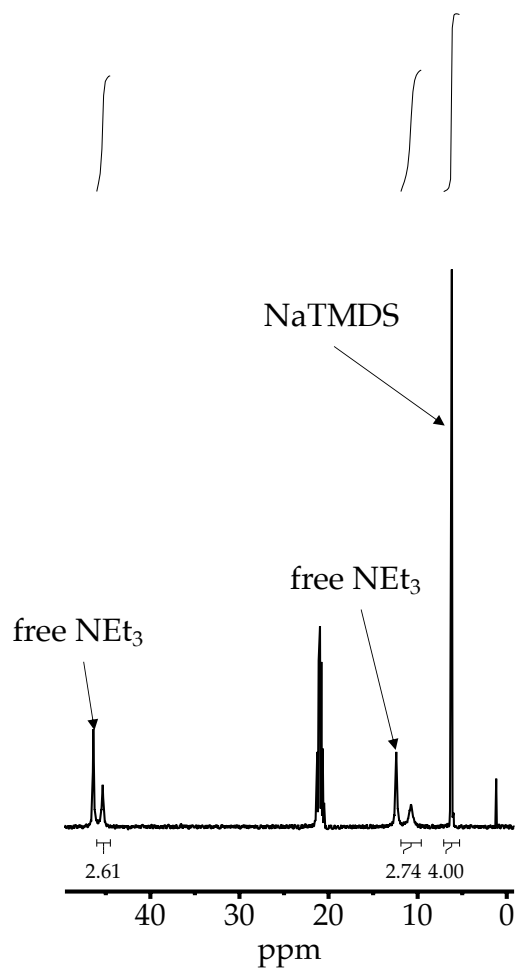

**Figure S14.**  $^{13}\text{C}$  NMR spectra of NaTMDS at 0.20 total molarity in 0.50 M triethylamine in toluene- $d_8$  cosolvent at  $-100\text{ }^\circ\text{C}$ . Free and bound triethylamine are observed at this temperature. Relative integrations so a 1:1 stoichiometry of triethylamine to NaTMDS.  $^{13}\text{C}$  spectra are referenced relative the toluene ipso-carbon chemical shift (137.86 ppm).

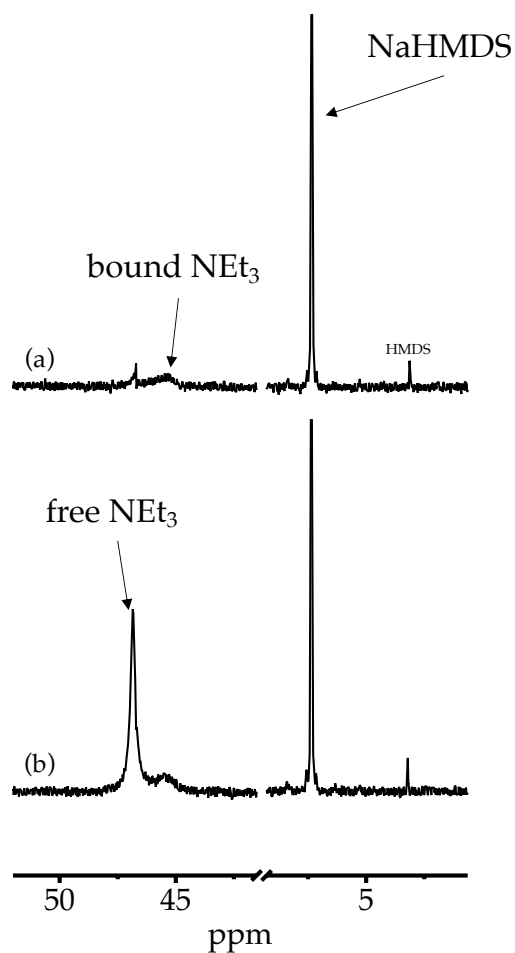

**Figure S15.**  $^{13}\text{C}$  NMR spectra of  $^{15}\text{N}$ NaHMDS at 0.10 M in 2:1 pentane/toluene- $d_8$  cosolvent with varying amounts of triethylamine added at  $-120^\circ\text{C}$ . The concentration of triethylamine in (a) and (b) are 0.15 M and 0.44 M, respectively. Free and bound triethylamine are observed at this temperature. Accurate relative integrations between NaHMDS and bound triethylamine were unable to be obtained, but over 1.0 equiv of triethylamine added the peak corresponding to free triethylamine grows.  $^{13}\text{C}$  spectra are referenced relative the toluene ipso-carbon chemical shift (137.86 ppm).

**N-Me-pyrrolidine (entry f):**

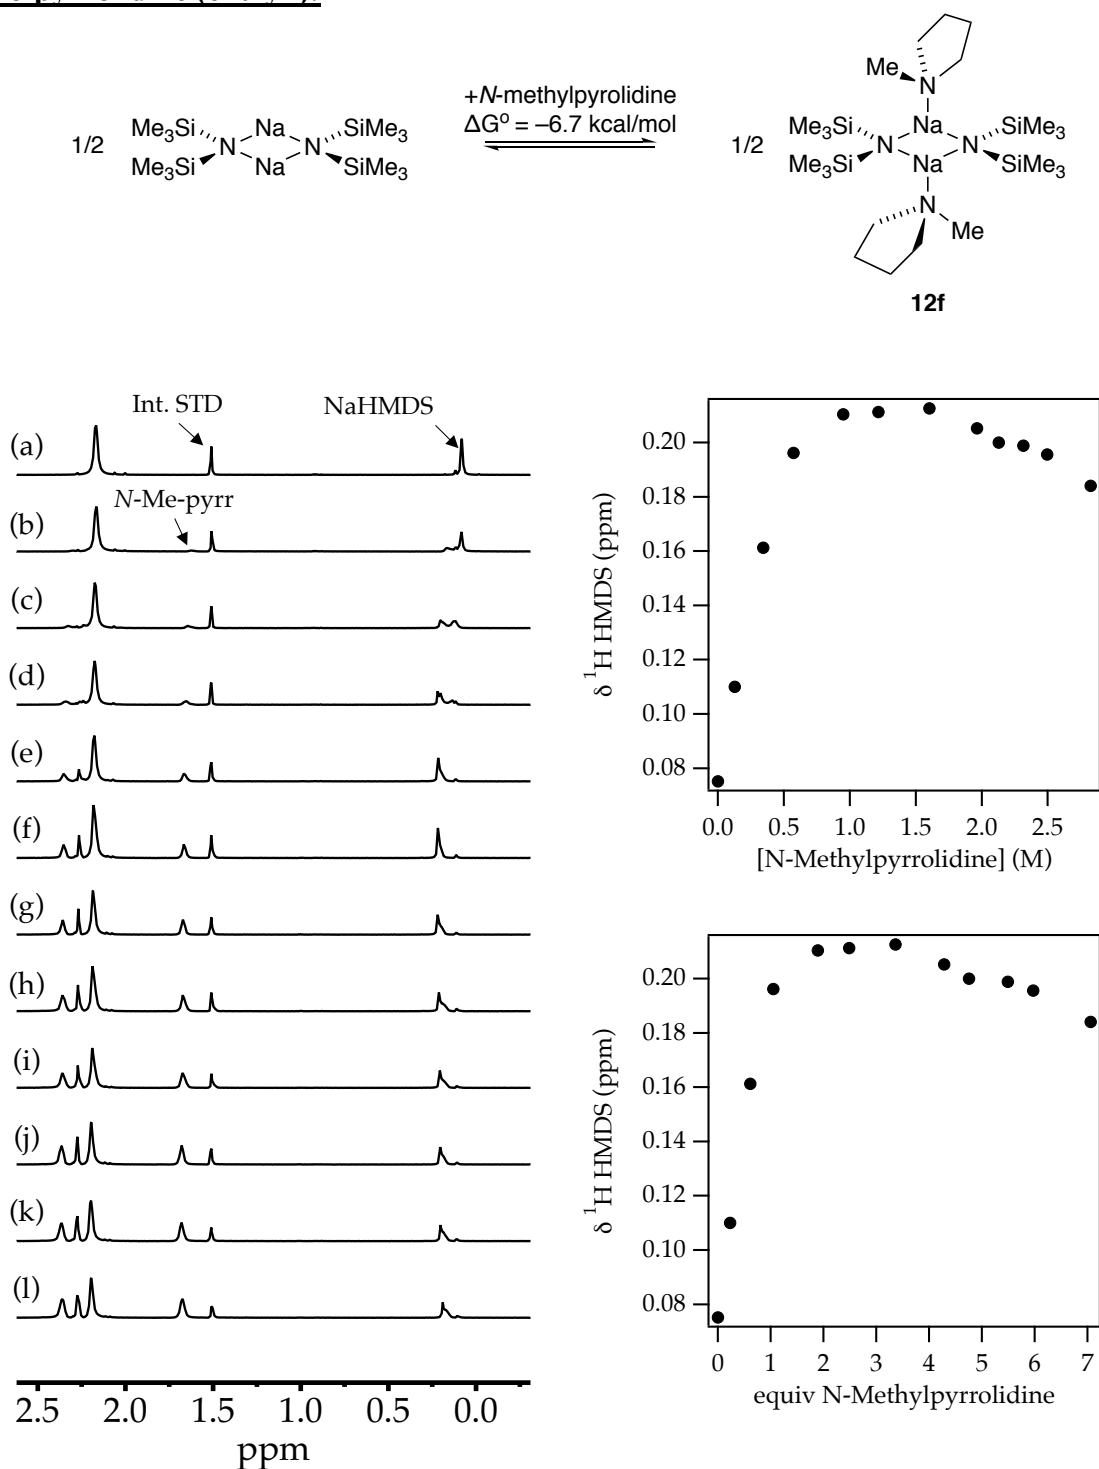

**Figure S16.**  $^1\text{H}$  NMR spectra for 0.55 M solutions of NaHMDS in toluene with cyclopentane internal standard (1.51 ppm) varying *N*-Me-pyrrolidine concentration at 25 °C. The concentrations of *N*-Me-pyrrolidine in (a)–(l) are 0.00, 0.13, 0.34, 0.57, 0.95, 1.21, 1.60, 1.96, 2.12, 2.31, 2.50, and 2.82, respectively. The plot shown corresponds to the spectra above.

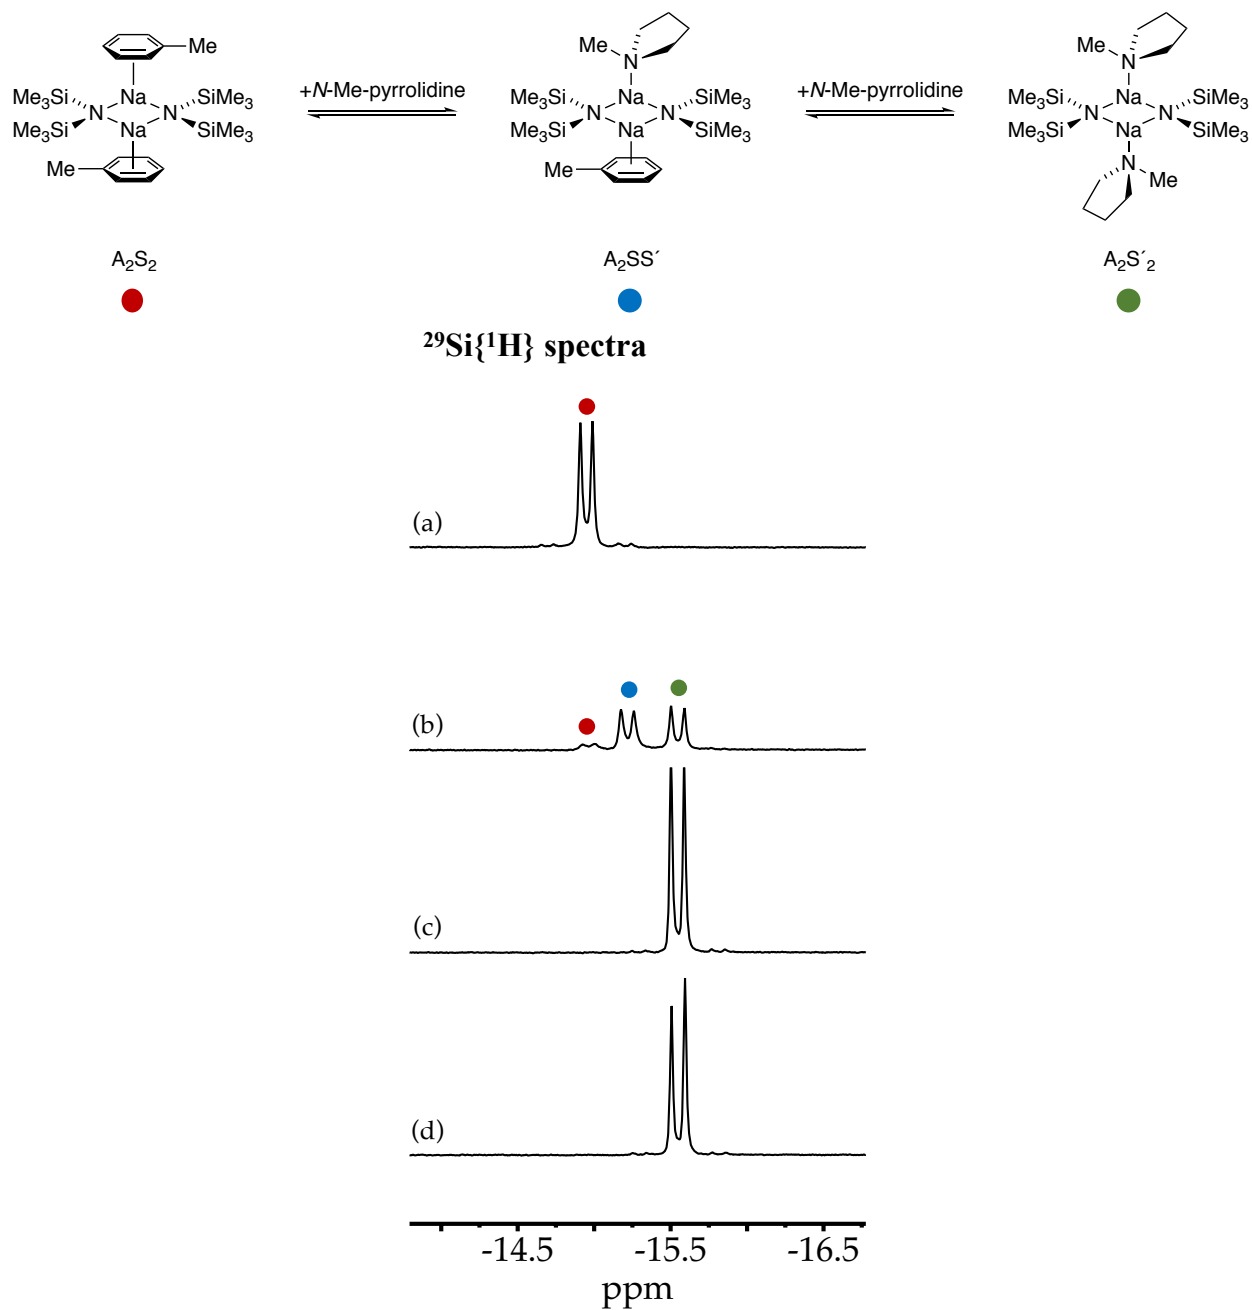

**Figure S17.**  $^{29}\text{Si}$  NMR spectra of 0.20 M  $[\text{}^{15}\text{N}]\text{NaHMDS}$  in 2:1 pentane/toluene- $d_8$  cosolvent with varying amounts of *N*-Me-pyrrolidine added at  $-120\text{ }^\circ\text{C}$ . The equivalents of *N*-Me-pyrrolidine for (a)–(d) are as follows: 0.0, 0.75, 1.5, and 5.0 equiv, respectively.  $^{29}\text{Si}$  spectra are referenced to a TMS internal standard (TMS chemical shift = 0.0 ppm for each).

**Pyridine (entry g):**

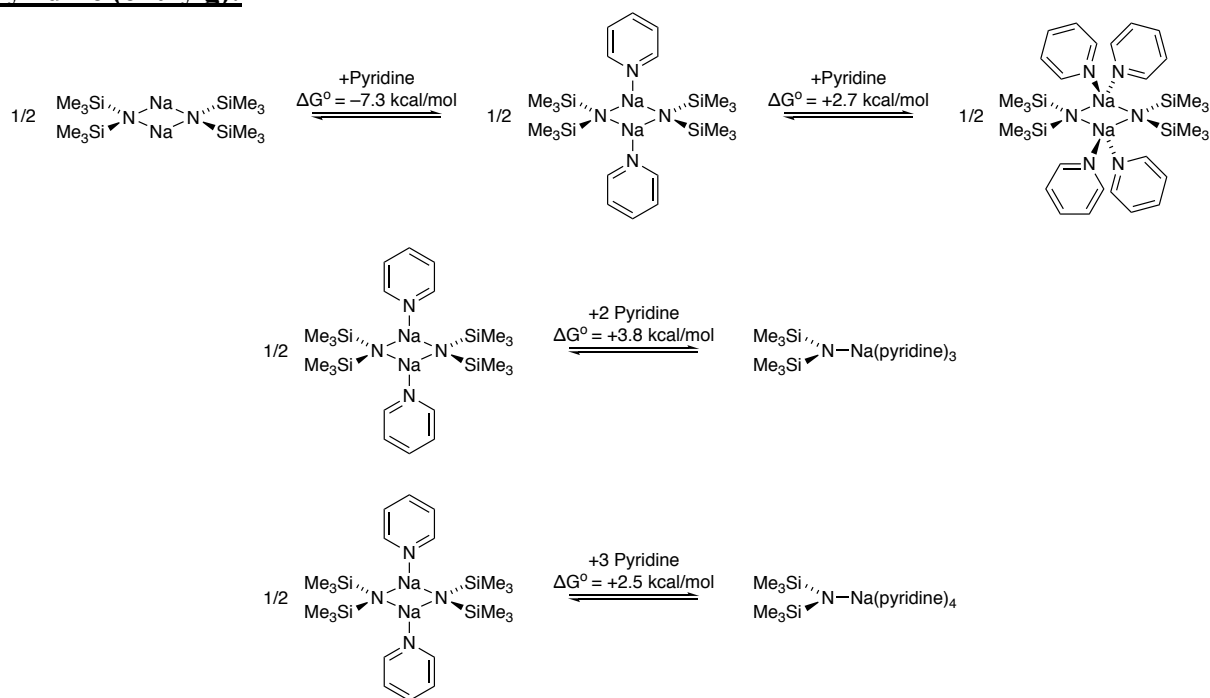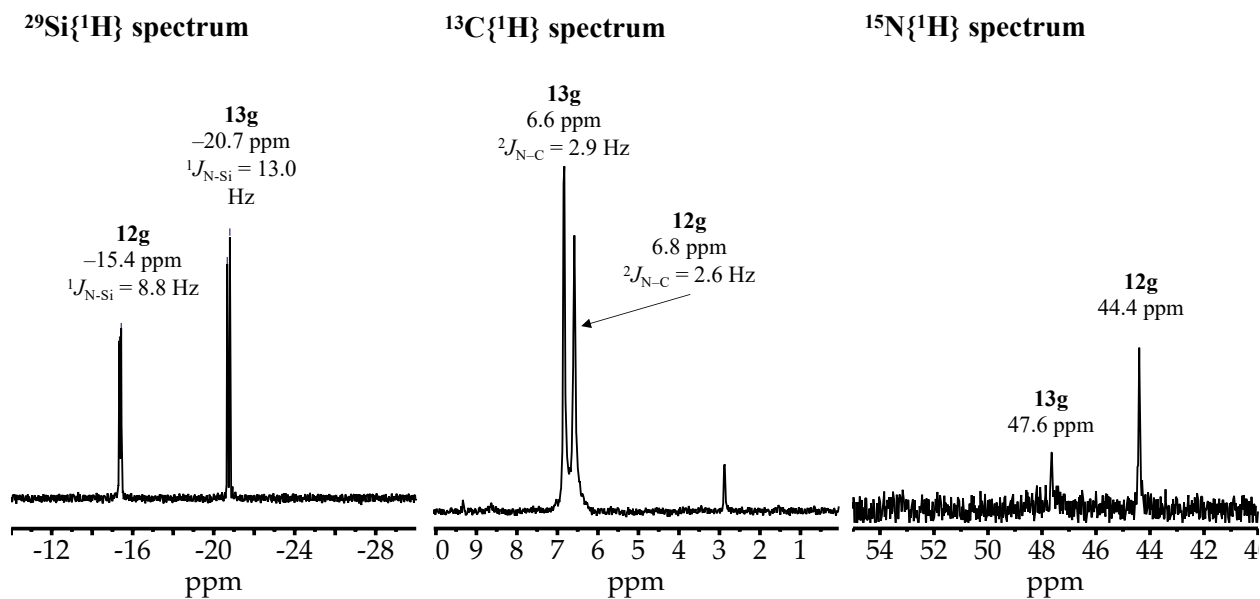

**Figure S18.** NMR spectra of  $[\text{}^{15}\text{N}]\text{NaHMDS}$  at intermediate concentrations of pyridine. Conditions vary on a per spectrum basis. Conditions in which each spectra were taken are delineated below.

$^{29}\text{Si}$  and  $^{13}\text{C}$  spectra: 0.15 M  $[\text{}^{15}\text{N}]\text{NaHMDS}$  with 0.45 M pyridine in DMEA cosolvent at  $-120^\circ\text{C}$ . The  $^{13}\text{C}$  spectrum is referenced to cyclopentane (26.05 ppm).

$^{15}\text{N}$  spectrum: 0.10 M  $[\text{}^{15}\text{N}]\text{NaHMDS}$  with 0.3 M pyridine in MTBE cosolvent at  $-110^\circ\text{C}$ .

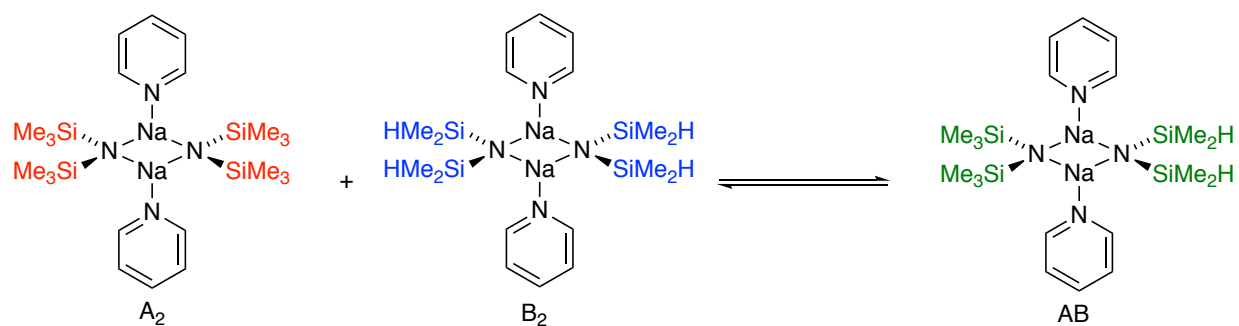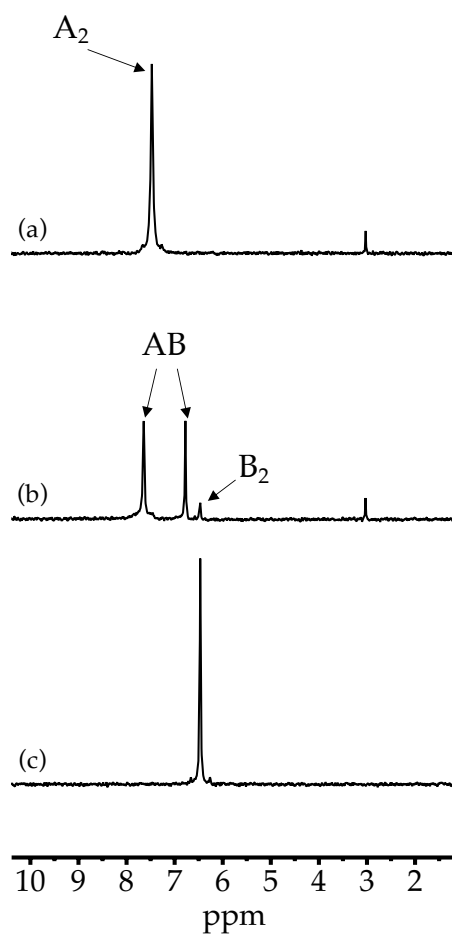

**Figure S19.**  $^{13}\text{C}$  NMR spectra of with mixing NaHMDS and NaTMDS at 0.10 total molarity in 0.30 M pyridine in toluene- $d_8$  cosolvent at  $-80^\circ\text{C}$ . The measured mole fractions,  $X_{\text{NaHMDS}}$ , in (a)–(c) are 1.00, 0.52, and 0.00, respectively.  $^{13}\text{C}$  spectra are referenced relative the toluene ipso-carbon chemical shift (137.86 ppm).

### $^{29}\text{Si}\{^1\text{H}\}$ spectra

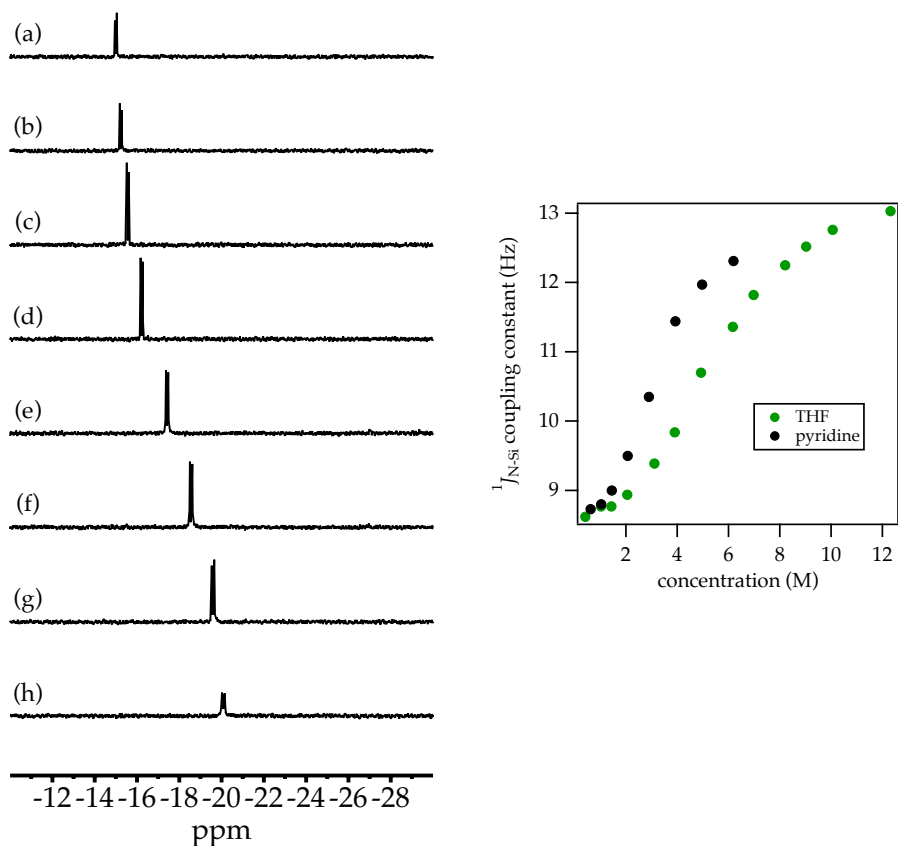

**Figure S20.**  $^{29}\text{Si}\{^1\text{H}\}$  NMR spectra of 0.10 M NaHMDS in 2:1 pentane/toluene varying the concentration of pyridine at +50 °C. Pyridine concentrations for (a)–(h) are as follows: 0.62, 1.03, 1.44, 2.06, 2.89, 3.92, 4.96, and 6.19 M, respectively. Concentrations for THF are listed below. Data acquisition at higher concentrations was cut short due to coalescence severely hindered resolution of coupling constants.

| [THF] (M) | $^1J_{\text{N-Si}}$ coupling constant (Hz) | [pyridine] (M) | $^1J_{\text{N-Si}}$ coupling constant (Hz) |
|-----------|--------------------------------------------|----------------|--------------------------------------------|
| 0.41      | 8.62                                       | 0.62           | 8.73                                       |
| 1.02      | 8.77                                       | 1.03           | 8.80                                       |
| 1.43      | 8.77                                       | 1.44           | 9.00                                       |
| 2.05      | 8.94                                       | 2.06           | 9.50                                       |
| 3.10      | 9.39                                       | 2.89           | 10.35                                      |
| 3.90      | 9.84                                       | 3.92           | 11.44                                      |
| 4.92      | 10.7                                       | 4.96           | 11.97                                      |
| 6.16      | 11.36                                      | 6.19           | 12.31                                      |
| 6.97      | 11.82                                      |                |                                            |
| 8.20      | 12.25                                      |                |                                            |
| 9.02      | 12.52                                      |                |                                            |
| 10.05     | 12.76                                      |                |                                            |
| 12.31     | 13.03                                      |                |                                            |

### Pyrrolidine (entry h):

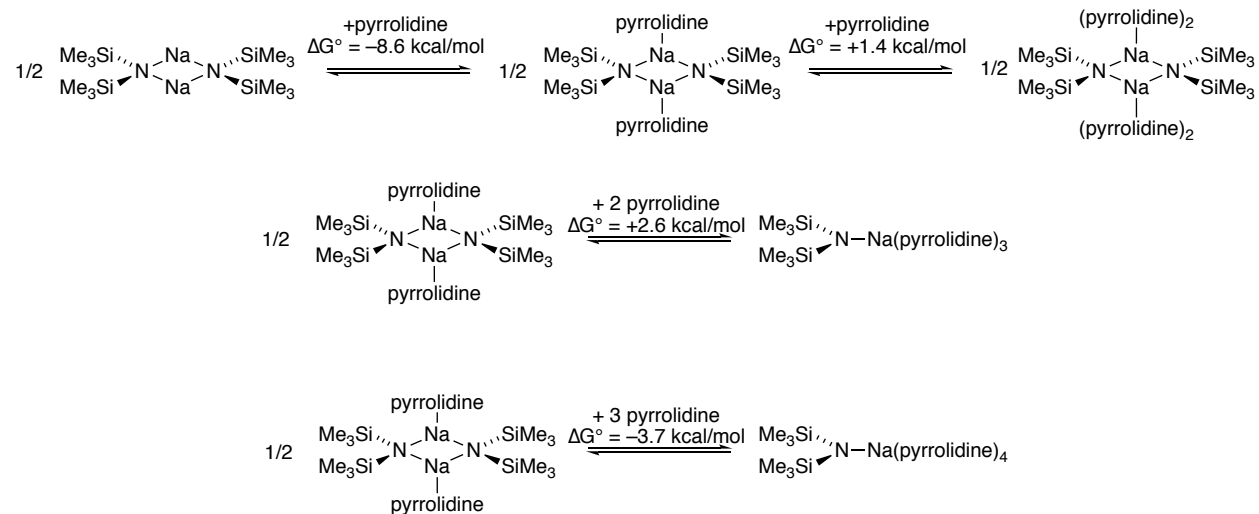

**Figure S21.** DFT computed energies of various NaHMDS pyrrolidine solvation states.



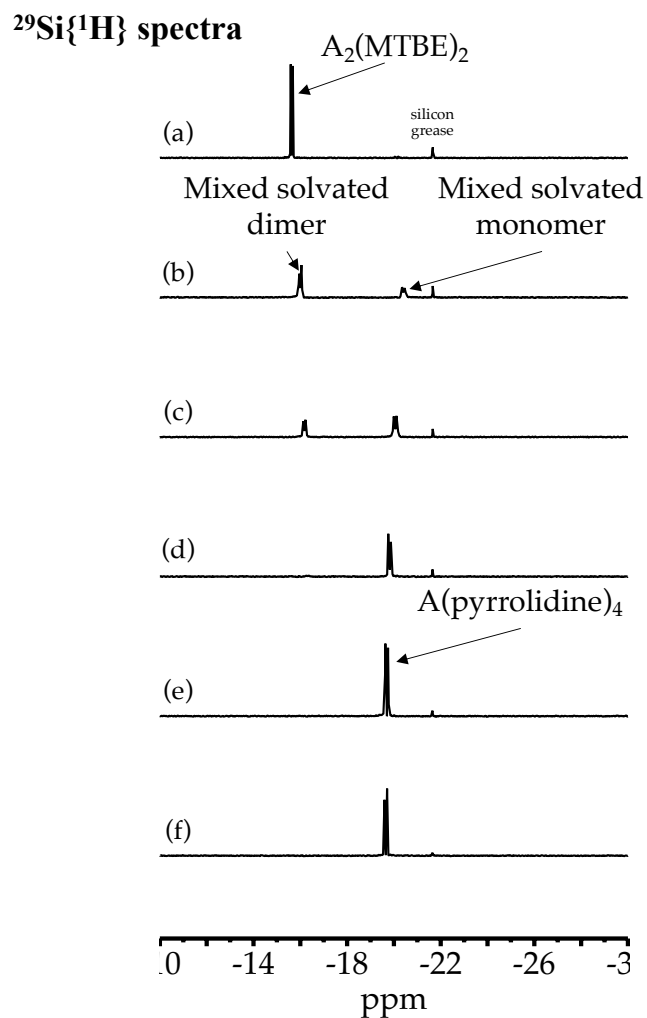

**Figure S22.**  $^{29}\text{Si}$  NMR spectra of 0.20 M  $[\text{}^{15}\text{N}]\text{NaHMDS}$  in MTBE cosolvent with varying amounts of pyrrolidine added at  $-110\text{ }^\circ\text{C}$ . The equivalents of pyrrolidine for (a)–(f) are as follows: 0.0, 1.0, 2.0, 3.0, 4.0, and 6.0 equiv, respectively.  $^{29}\text{Si}$  spectra are referenced to a TMS internal standard (TMS chemical shift = 0.0 ppm for each).

### Diethyl ether (entry i):

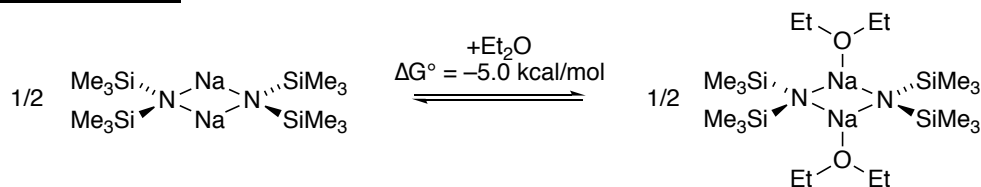

$^{29}\text{Si}\{^1\text{H}\}$  spectrum

$^{13}\text{C}\{^1\text{H}\}$  spectrum

$^{15}\text{N}\{^1\text{H}\}$  spectrum

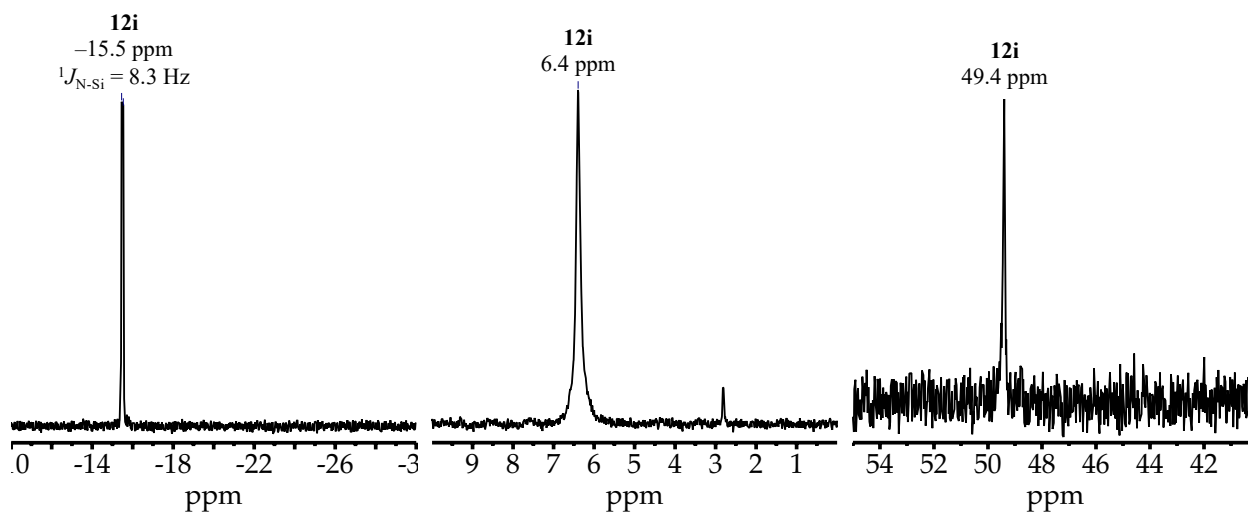

**Figure S23.** NMR spectra of  $^{15}\text{N}$ NaHMDS in various cosolvents with added diethyl ether. Conditions vary on a per spectrum basis. Conditions in which each spectra were taken are delineated below.

$^{29}\text{Si}$  and  $^{13}\text{C}$  spectra: 0.15 M  $^{15}\text{N}$ NaHMDS with 4.5 M diethyl ether in DMEA cosolvent at  $-120^\circ\text{C}$ . Cyclopentane internal standard was used.

$^{15}\text{N}$  spectrum: 0.10 M  $^{15}\text{N}$ NaHMDS in neat diethyl ether (9.60 M) at  $25^\circ\text{C}$ . TMS internal standard was used.

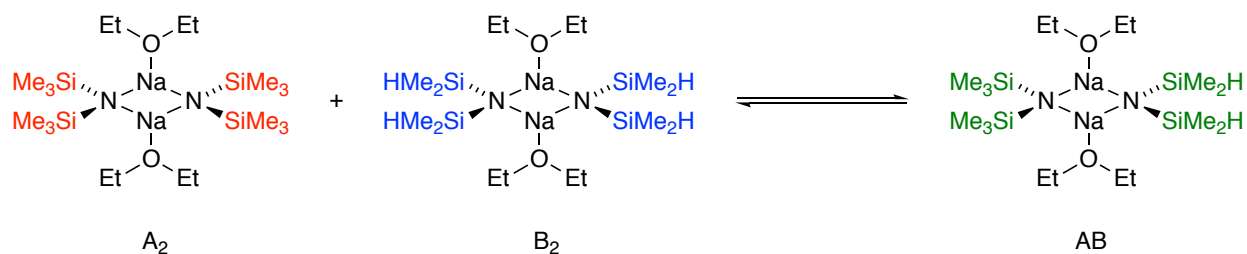

**<sup>13</sup>C{<sup>1</sup>H} spectra**

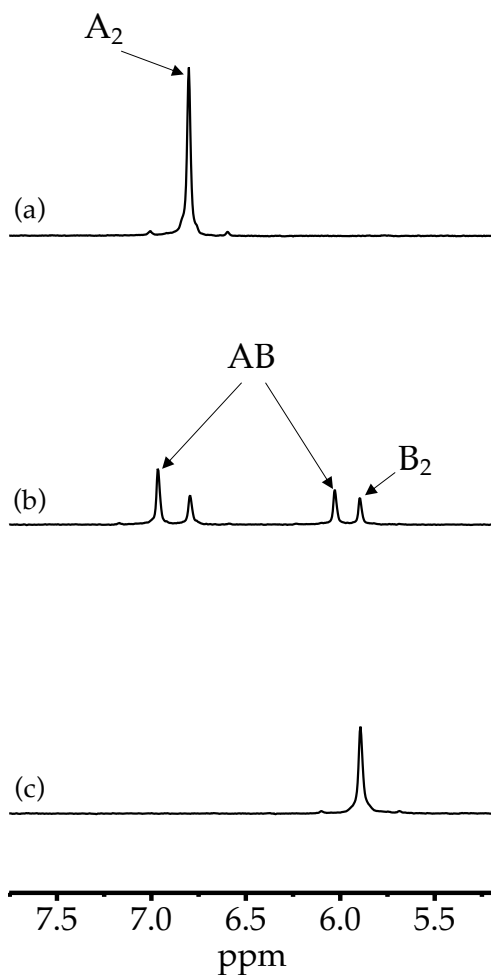

**Figure S24.** <sup>13</sup>C NMR spectra of with mixing NaHMDS and NaTMDS at 0.20 total molarity in 0.80 M diethyl ether in toluene-*d*<sub>8</sub> cosolvent at -80 °C. The measured mole fractions,  $X_{\text{NaHMDS}}$ , in (a)–(c) are 1.00, 0.50, and 0.00, respectively. <sup>13</sup>C spectra are referenced relative the toluene ipso-carbon chemical shift (137.86 ppm).

## $^{29}\text{Si}\{^1\text{H}\}$ spectra

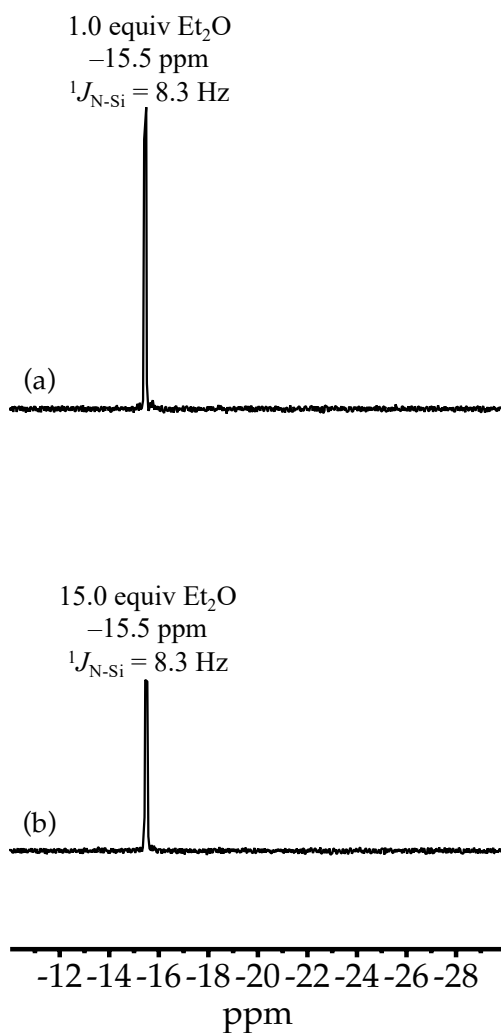

**Figure S25.**  $^{29}\text{Si}$  NMR spectra of 0.15 M  $[^{15}\text{N}]\text{NaHMDS}$  in DMEA cosolvent with varying amounts of diethyl ether added at  $-120$  °C. The equivalents of diethyl ether for (a) and (b) are as follows: 1.0 and 15.0 equiv, respectively.

**Methyl *tert*-butyl ether (entry j):**

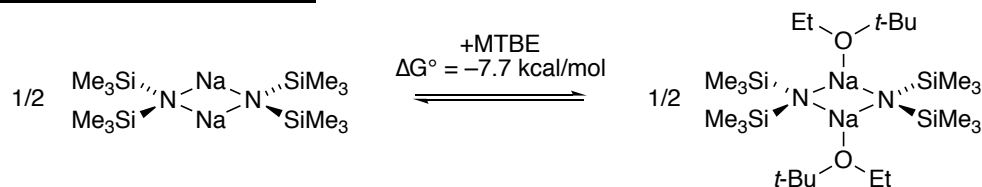

$^{29}\text{Si}\{^1\text{H}\}$  spectrum

$^{13}\text{C}\{^1\text{H}\}$  spectrum

$^{15}\text{N}\{^1\text{H}\}$  spectrum

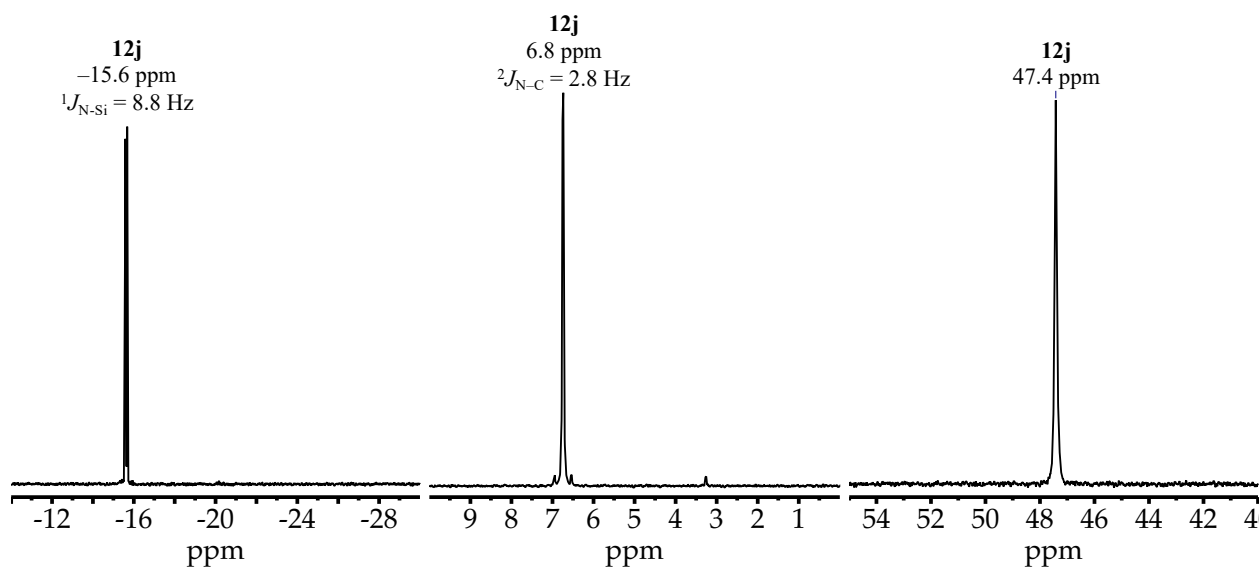

**Figure S26.** NMR spectra of  $^{15}\text{N}$ NaHMDS at intermediate concentrations of methyl *tert*-butyl ether. Conditions vary on a per spectrum basis. Conditions in which each spectra where taken are delineated below.

$^{29}\text{Si}$  spectrum: 0.20 M  $^{15}\text{N}$ NaHMDS in neat MTBE at  $-110^\circ\text{C}$ . TMS internal standard was used.

$^{13}\text{C}$  spectrum: 0.30 M  $^{15}\text{N}$ NaHMDS with 5.55 M MTBE in toluene cosolvent at  $-80^\circ\text{C}$ .  $^{13}\text{C}$  spectra are referenced relative the toluene ipso-carbon chemical shift (137.86 ppm).

$^{15}\text{N}$  spectrum: 0.15 M  $^{15}\text{N}$ NaHMDS with 2.75 M MTBE in DMEA cosolvent at  $-110^\circ\text{C}$ .  $^{15}\text{N}$  spectra are referenced to DMEA (25.7 ppm).

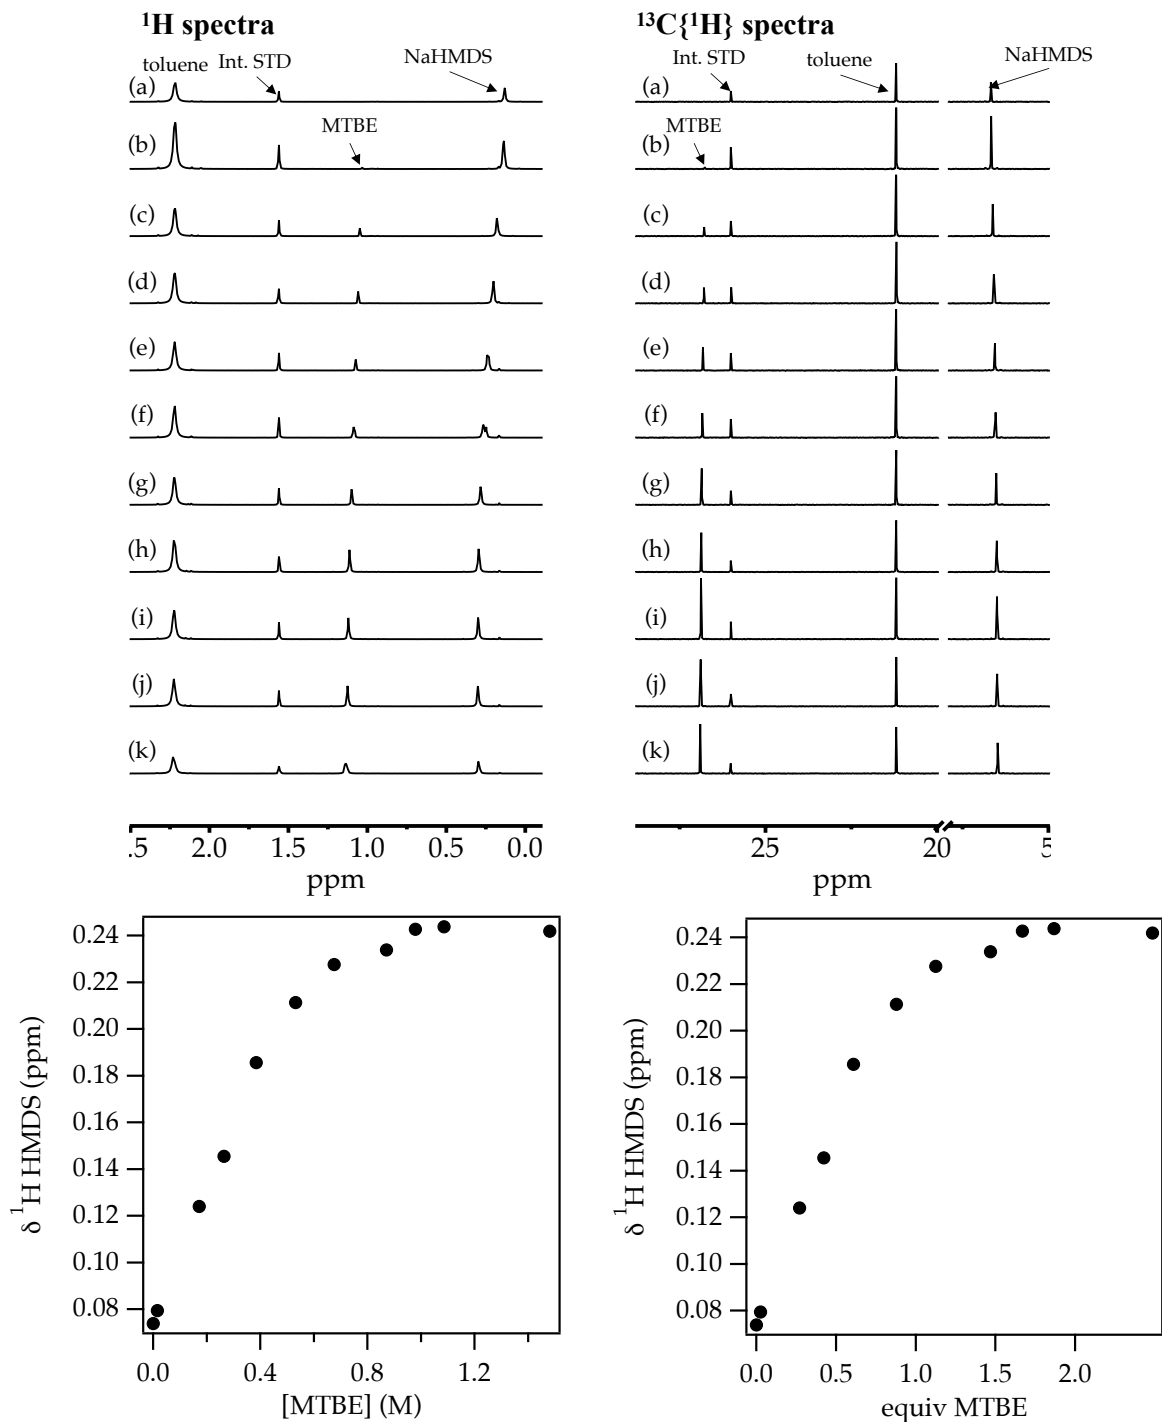

**Figure S27.**  $^1\text{H}$  and  $^{13}\text{C}\{^1\text{H}\}$  NMR spectra for 0.60 M solutions of NaHMDS in toluene with cyclopentane internal standard varying methyl *tert*-butyl ether concentration at 25 °C. The concentrations of methyl *tert*-butyl ether in (a)–(k) are 0.00, 0.02, 0.17, 0.26, 0.38, 0.53, 0.68, 0.87, 0.98, 1.10, and 1.50, respectively. The plot shown corresponds to the spectra above.

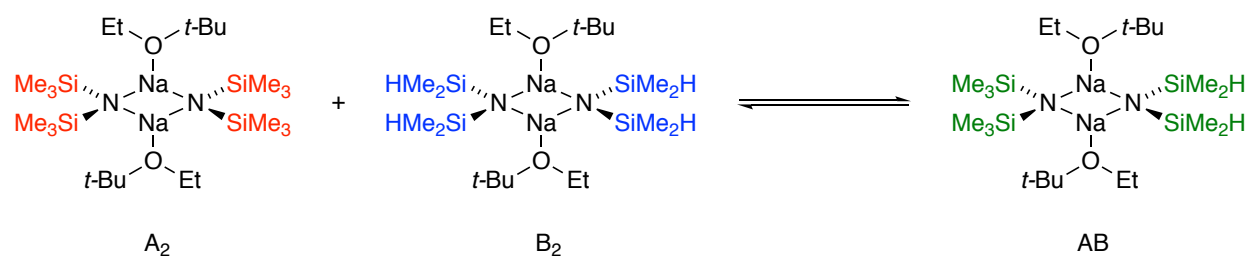

### $^{13}\text{C}\{^1\text{H}\}$ spectra

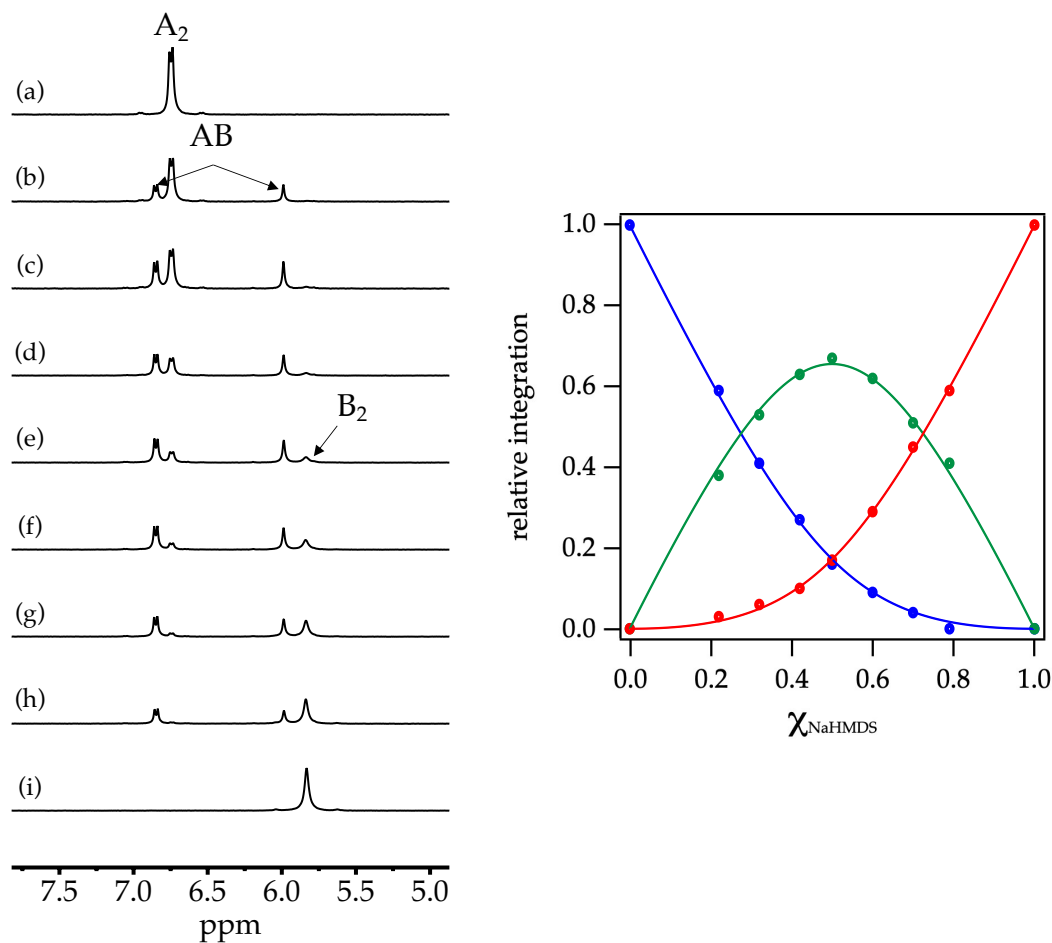

**Figure S28.**  $^{13}\text{C}$  NMR spectra and affiliated Job plot showing relative integrations of NaHMDS-derived homodimer (A<sub>2</sub>, red), NaTMDS-derived homodimer (B<sub>2</sub>, blue), and heterodimer (AB, green) versus the measured mole fraction of NaHMDS ( $\chi_{\text{NaHMDS}}$ ) at 0.30 total molarity in 5.50 M methyl tert-butyl ether in toluene cosolvent at  $-80\text{ }^\circ\text{C}$ . The measured mole fractions,  $\chi_{\text{NaHMDS}}$ , in (a)–(g) are 1.00, 0.79, 0.70, 0.60, 0.50, 0.42, 0.32, 0.22, and 0.00, respectively.

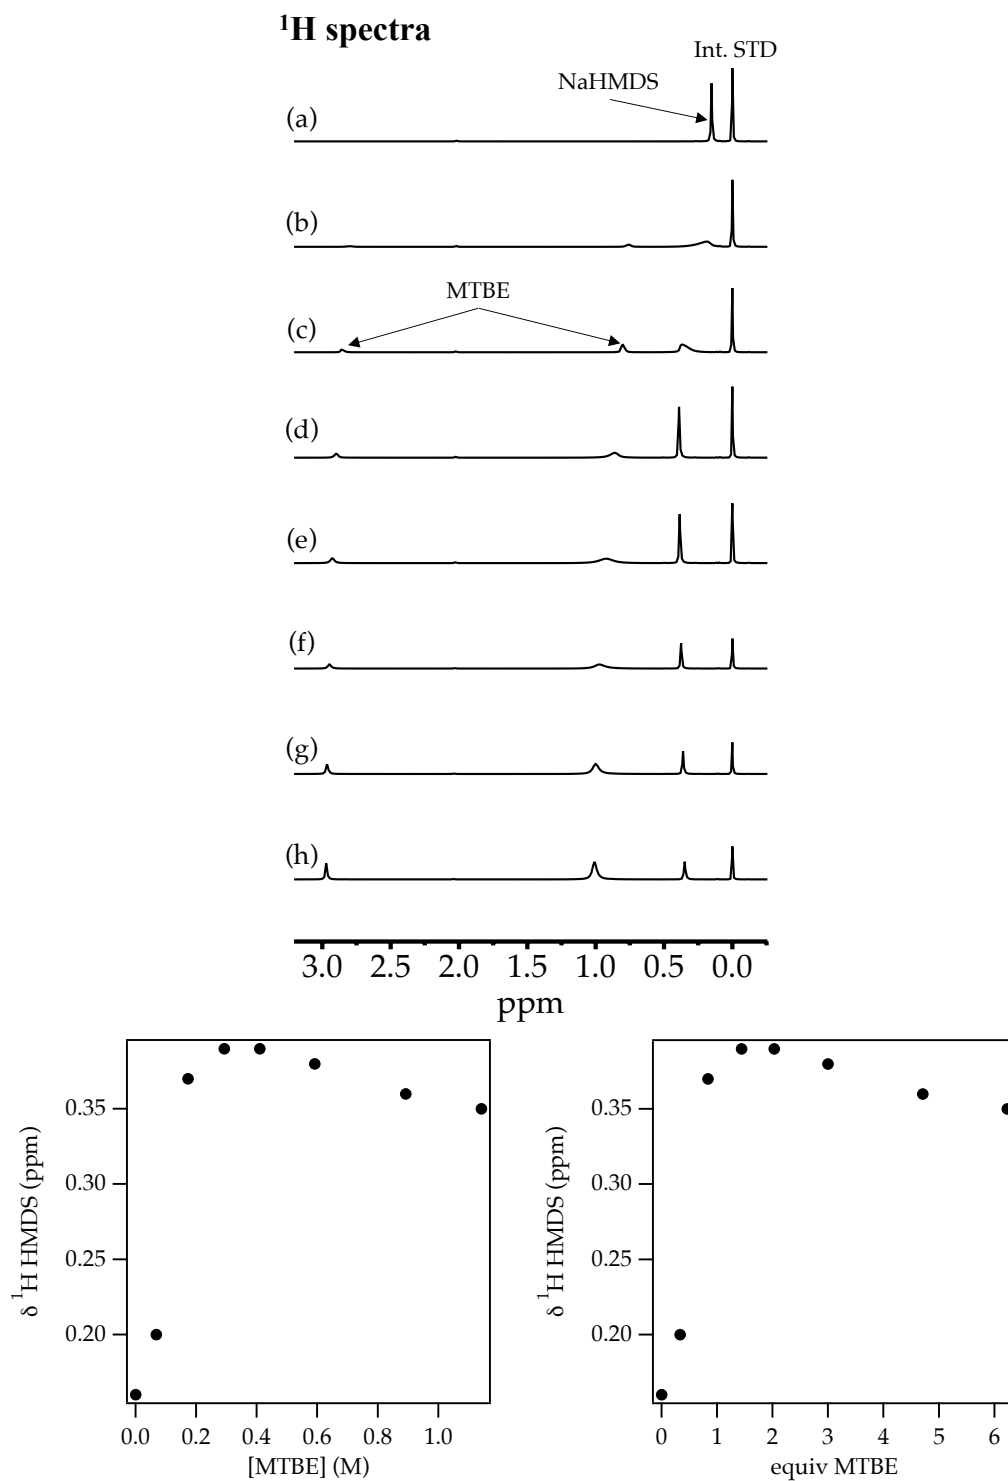

**Figure S29.**  $^1\text{H}$  NMR spectra for 0.20 M solutions of NaHMDS in toluene with TMS internal standard varying methyl *tert*-butyl ether concentration at  $-80\text{ }^\circ\text{C}$ . The concentrations of methyl *tert*-butyl ether in (a)–(h) are 0.00, 0.07, 0.17, 0.29, 0.41, 0.59, 0.89, and 1.14, respectively. The plot shown corresponds to the spectra above.



**1,4-dioxane (entry k):**

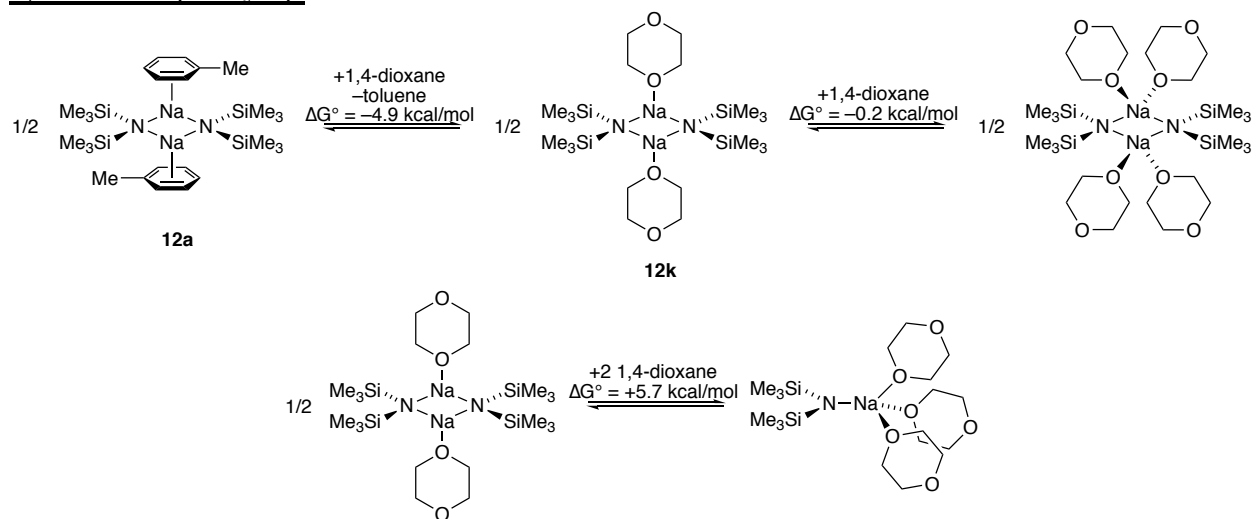

**Figure S30.** Computed free energies for the serial solvation of NaHMDS with 1,4-dioxane.

### $^{29}\text{Si}\{^1\text{H}\}$ spectra

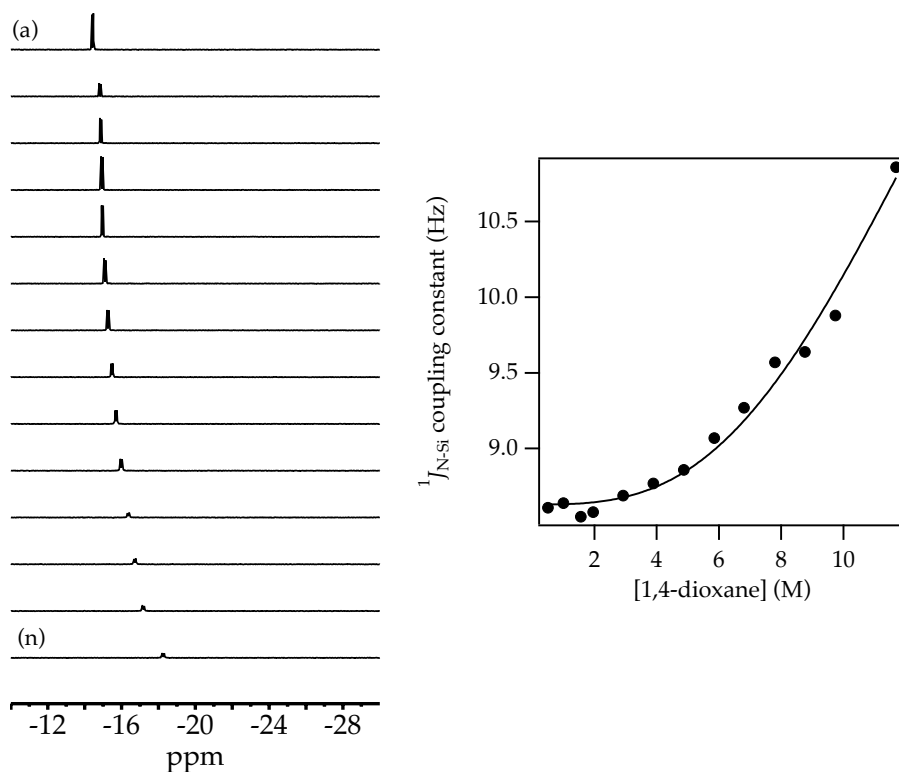

**Figure S31.**  $^{29}\text{Si}$  NMR spectra of 0.10 M NaHMDS in 2:1 pentane/toluene varying the concentration of 1,4-dioxane at +20 °C. 1,4-Dioxane concentration for (a)–(n) are as follows: 0.50, 1.00, 1.56, 1.95, 2.92, 3.89, 4.87, 5.85, 6.80, 7.80, 8.76, 9.74, and 11.69, respectively. The curve is fit to the function described in the “Derivation” section of this Supporting Information on page S-117 with  $n = 3$ .

| [1,4-dioxane] (M) | $^1J_{\text{N-Si}}$ coupling constant (Hz) |
|-------------------|--------------------------------------------|
| 0.50*             | 8.61                                       |
| 1.00*             | 8.64                                       |
| 1.56              | 8.55                                       |
| 1.95              | 8.58                                       |
| 2.92              | 8.69                                       |
| 3.89              | 8.77                                       |
| 4.87              | 8.86                                       |
| 5.85              | 9.07                                       |
| 6.80              | 9.27                                       |
| 7.80              | 9.57                                       |
| 8.76              | 9.64                                       |
| 9.74              | 9.88                                       |
| 11.69             | 10.86                                      |

\* due to polymeric network at the bottom of the tube an accurate concentration was not obtained. 0.50 M and 1.00 M are idealized concentrations.

**1,3-dioxolane (entry I):**

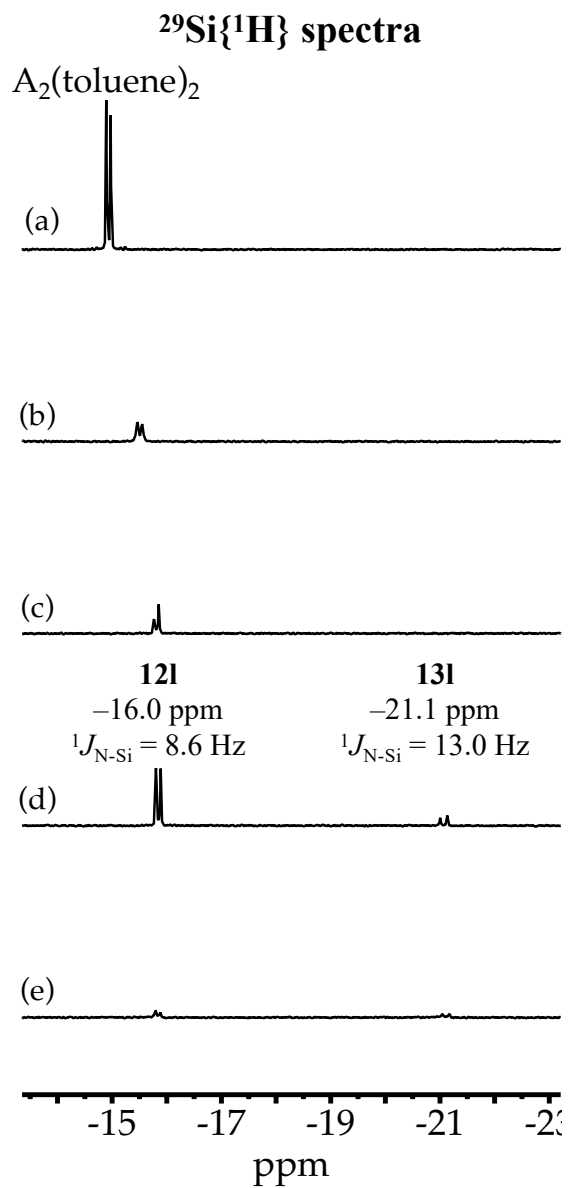

**Figure S32.**  $^{29}\text{Si}$  NMR spectra of 0.10 M  $[^{15}\text{N}]\text{NaHMDS}$  in 2:1 pentane/toluene cosolvent with varying amounts of 1,3-dioxolane added at  $-120^\circ\text{C}$ . The equivalents of dioxolane for (a)–(e) are as follows: 0.0, 0.5, 1.0, 3.0, and 5.0 equiv respectively. At 0.5 equiv a polymeric network was present at the bottom of the NMR tube.

### Tetrahydrofuran (entry m):

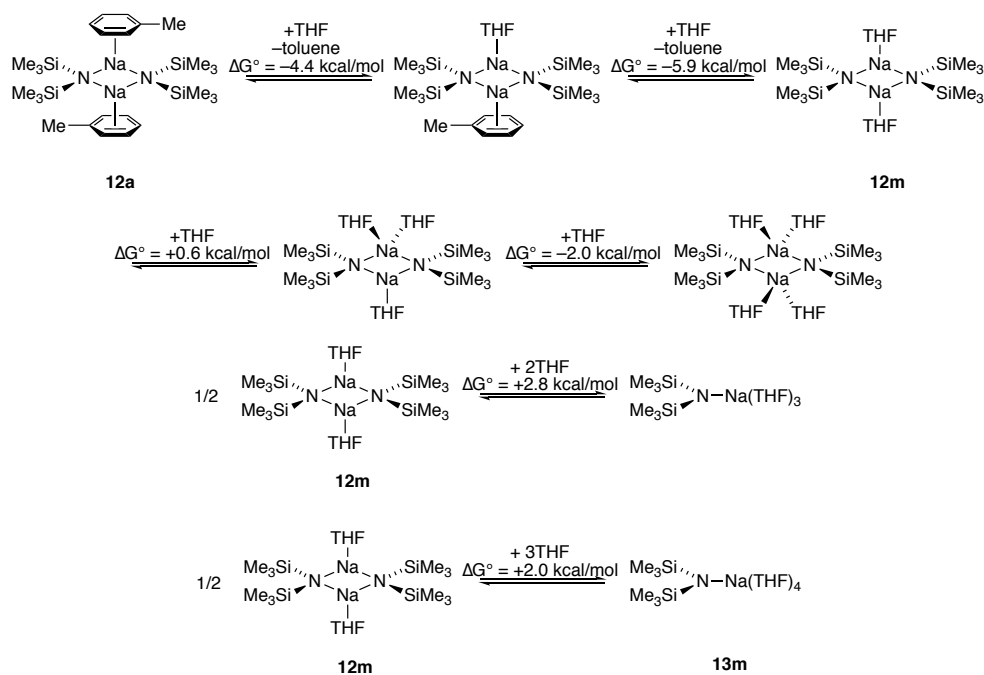

$^{29}\text{Si}\{^1\text{H}\}$  spectrum

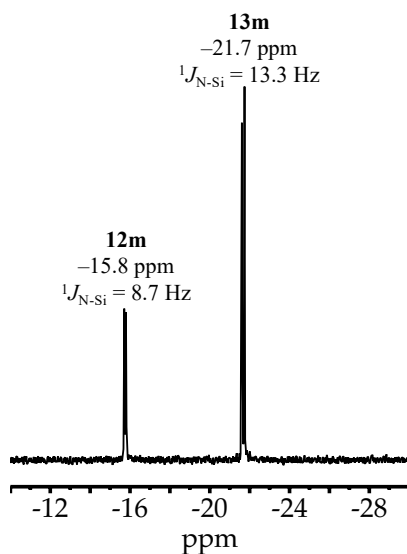

$^{13}\text{C}\{^1\text{H}\}$  spectrum

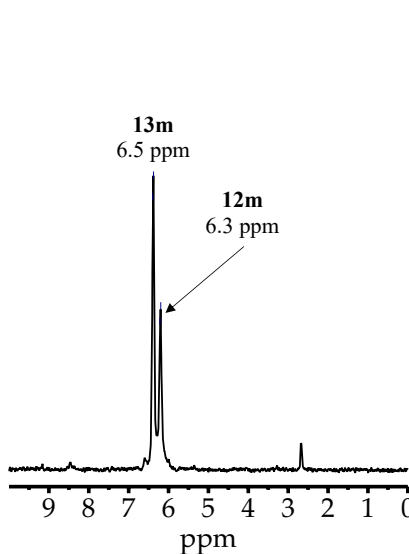

$^{15}\text{N}\{^1\text{H}\}$  spectrum

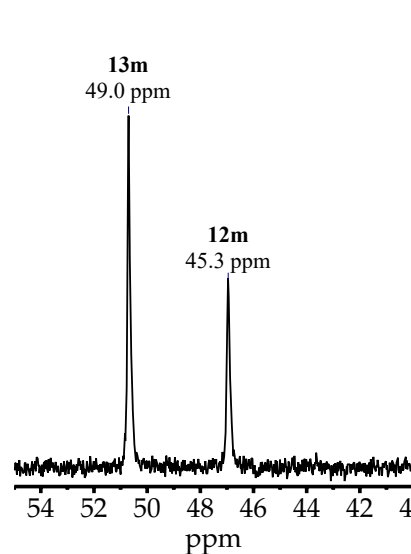

**Figure S33.** NMR spectra of 0.15 M  $^{15}\text{N}$ NaHMDS in 0.75 M THF with DMEA cosolvent at  $-120^\circ\text{C}$ .  $^{13}\text{C}$  spectra are referenced relative cyclopentane (26.05 ppm).  $^{15}\text{N}$  spectra are referenced to DMEA (25.7 ppm).

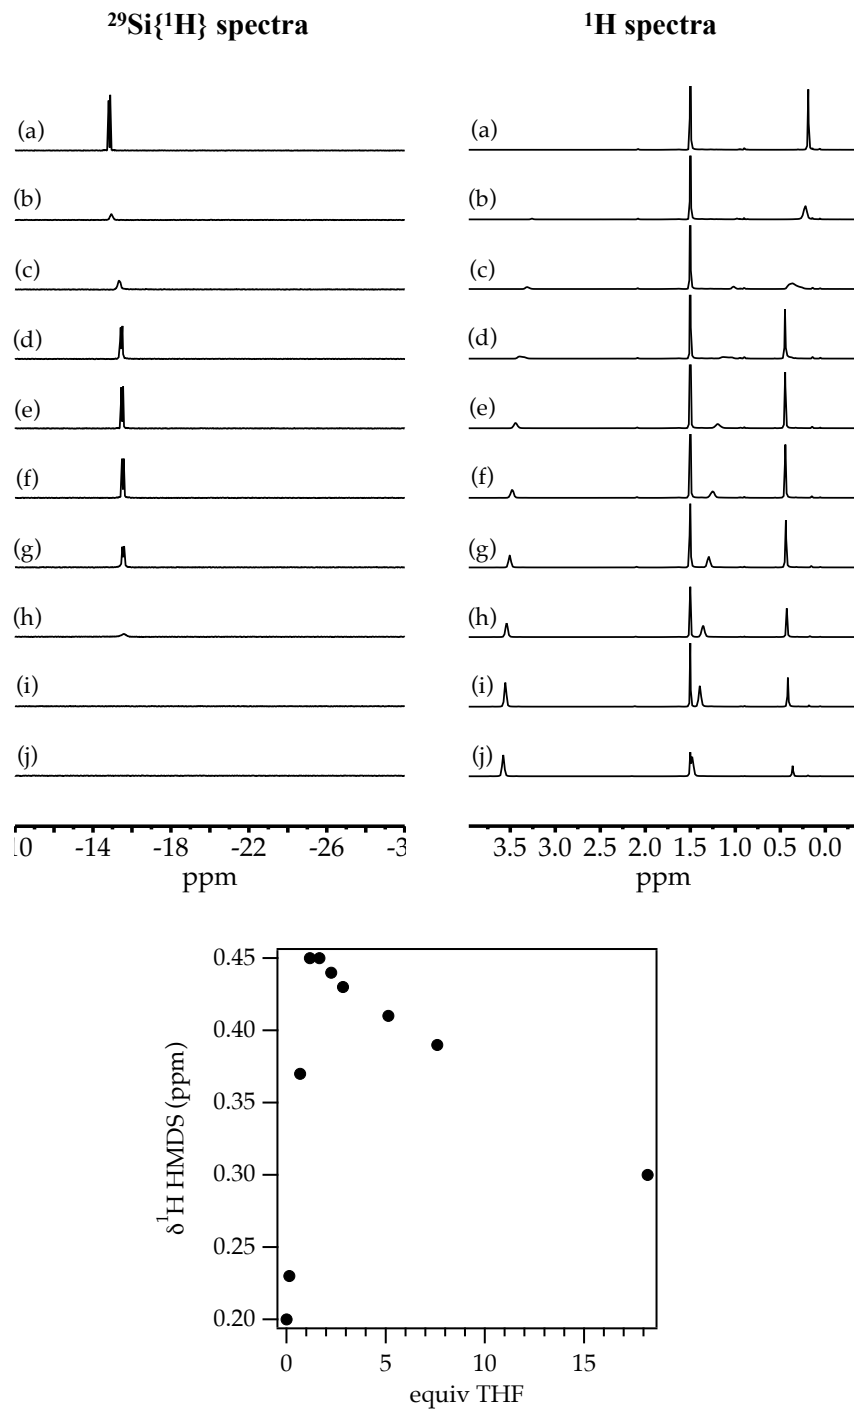

**Figure S34.**  $^1\text{H}$  and  $^{29}\text{Si}\{^1\text{H}\}$  NMR spectra for the titration of 0.23 M NaHMDS in toluene- $d_8$  with THF at  $-80\text{ }^\circ\text{C}$ . Equiv of THF for (a)–(j) are as follows: 0.0, 0.1, 0.7, 1.2, 1.7, 2.3, 2.8, 5.1, 7.6, and 18.2, respectively.  $^1\text{H}$  are referenced to cyclopentane (1.51 ppm).

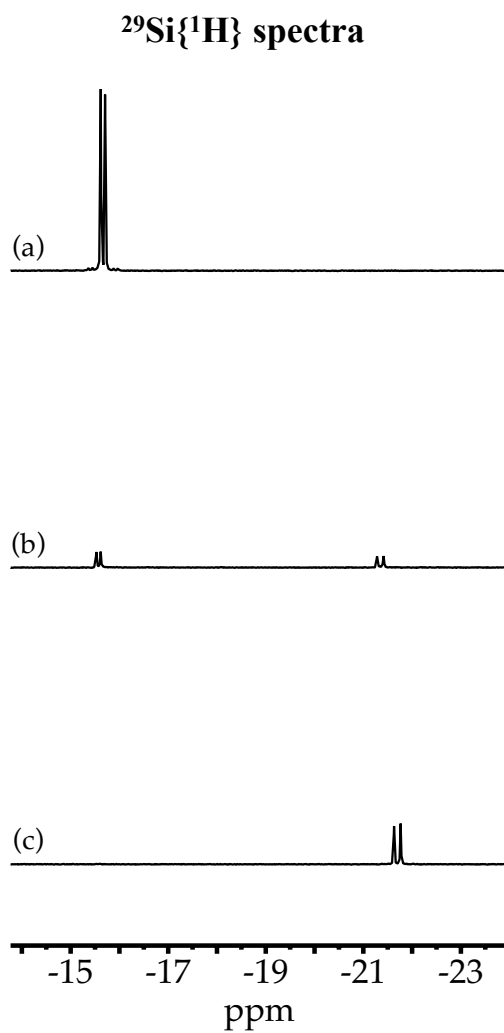

**Figure S35.**  $^{29}\text{Si}\{^1\text{H}\}$  NMR spectra for the titration of 0.15 M NaHMDS in DMEA with THF at  $-120\text{ }^\circ\text{C}$ . Equiv of THF for (a)–(c) are as follows: 0.0, 4.0, and 10.0, respectively.

### $^{29}\text{Si}\{^1\text{H}\}$ spectra

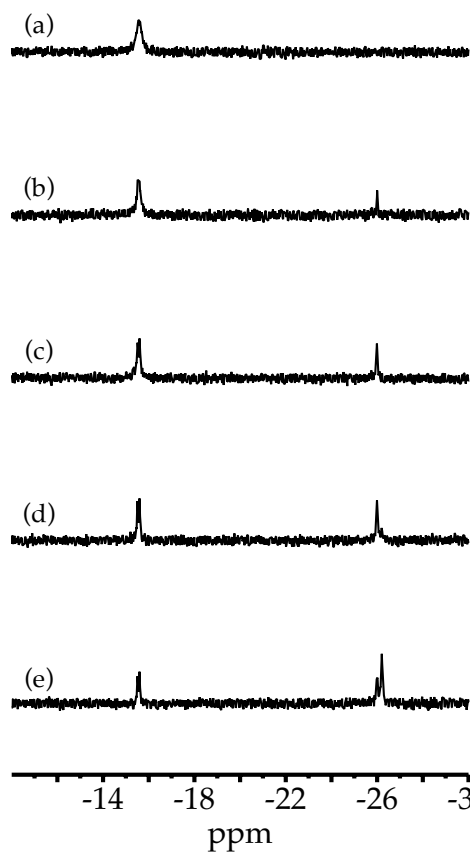

**Figure S36.**  $^{29}\text{Si}\{^1\text{H}\}$  NMR spectra of NaHMDS-derived homodimer ( $A_2$ ), NaTMDS-derived homodimer ( $B_2$ ), and heterodimer ( $AB$ ) at 0.20 total molarity with 5.0 equiv THF in toluene cosolvent at  $-80\text{ }^\circ\text{C}$ . The mole fraction of NaHMDS for (a)–(e) are as follows: 1.0, 0.8, 0.7, 0.5, and 0.3, respectively. Due to the poor resolution, a formal Job plot was not obtained. However, based on the coupling constants of (b)–(e) dimer is present at this THF concentration.

### $^{29}\text{Si}\{^1\text{H}\}$ spectra

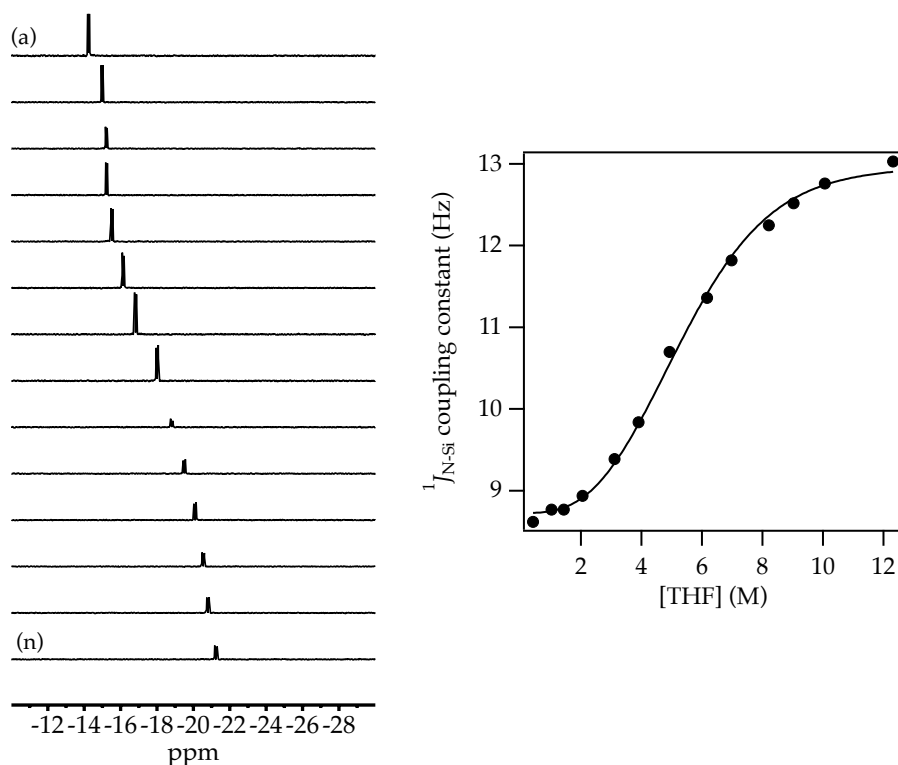

**Figure S37.**  $^{29}\text{Si}\{^1\text{H}\}$  NMR spectra of 0.10 M NaHMDS in 2:1 pentane/toluene varying the concentration of THF at +50 °C. THF concentration for (a)–(n) are as follows: 0.00, 0.41, 1.02, 1.43, 2.05, 3.10, 3.90, 4.92, 6.16, 6.97, 8.2, 9.02, 10.05, and 12.31, respectively. The curve is fit to the function described in the “Derivation” section of this Supporting Information on page S-117 with  $n = 3$ .

| [THF] (M) | $^1J_{\text{N-Si}}$ coupling constant (Hz) |
|-----------|--------------------------------------------|
| 0.41      | 8.62                                       |
| 1.02      | 8.77                                       |
| 1.43      | 8.77                                       |
| 2.05      | 8.94                                       |
| 3.10      | 9.39                                       |
| 3.90      | 9.84                                       |
| 4.92      | 10.7                                       |
| 6.16      | 11.36                                      |
| 6.97      | 11.82                                      |
| 8.20      | 12.25                                      |
| 9.02      | 12.52                                      |
| 10.05     | 12.76                                      |
| 12.31     | 13.03                                      |



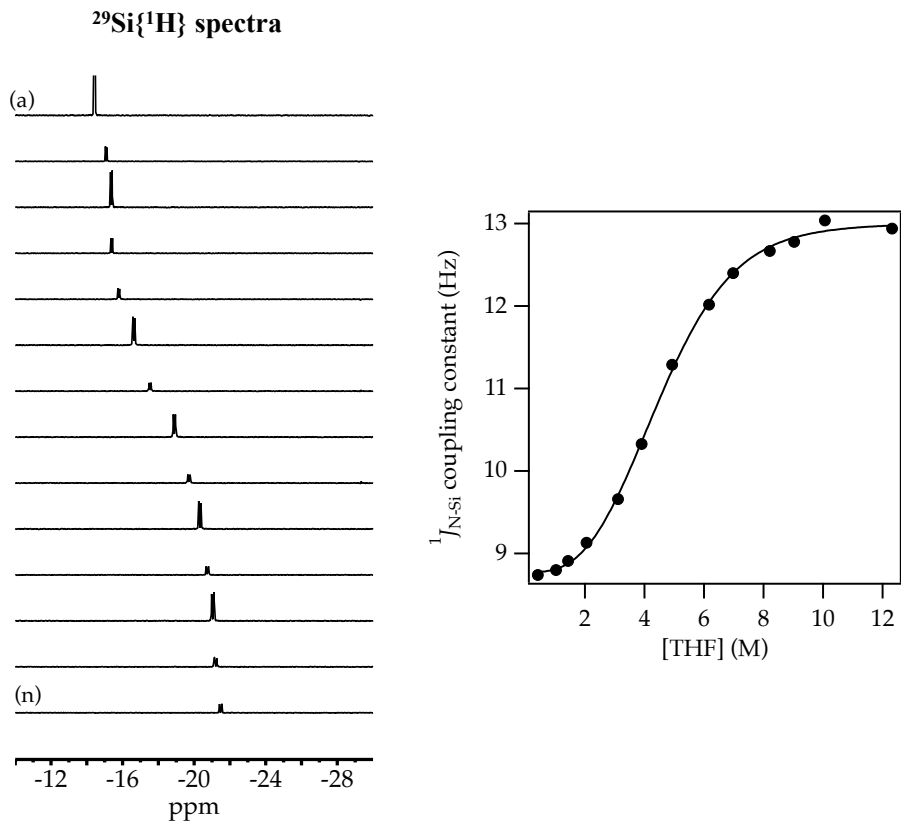

**Figure S38.**  $^{29}\text{Si}\{^1\text{H}\}$  NMR spectra of 0.10 M NaHMDS in 2:1 pentane/toluene varying the concentration of THF at +20 °C. THF concentration for (a)–(n) are as follows: 0.00, 0.41, 1.02, 1.43, 2.05, 3.10, 3.90, 4.92, 6.16, 6.97, 8.2, 9.02, 10.05, and 12.31, respectively. The curve is fit to the function described in the “Derivation” section of this Supporting Information on page S-117 with  $n = 3$ .

| [THF] (M) | $^1J_{\text{N-Si}}$ coupling constant (Hz) |
|-----------|--------------------------------------------|
| 0.41      | 8.74                                       |
| 1.02      | 8.8                                        |
| 1.43      | 8.91                                       |
| 2.05      | 9.13                                       |
| 3.10      | 9.66                                       |
| 3.90      | 10.33                                      |
| 4.92      | 11.29                                      |
| 6.16      | 12.02                                      |
| 6.97      | 12.4                                       |
| 8.20      | 12.67                                      |
| 9.02      | 12.78                                      |
| 10.05     | 13.04                                      |
| 12.31     | 12.94                                      |

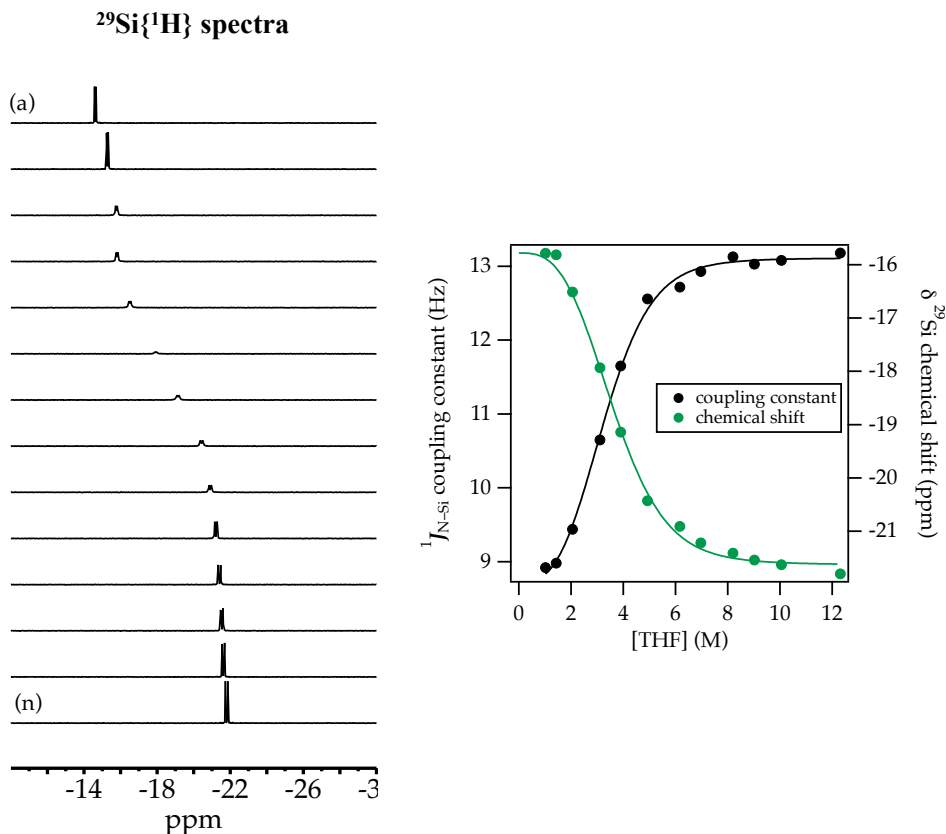

**Figure S39.**  $^{29}\text{Si}\{^1\text{H}\}$  NMR spectra of 0.10 M NaHMDS in 2:1 pentane/toluene varying the concentration of THF at  $-20\text{ }^\circ\text{C}$ . THF concentration for (a)–(n) are as follows: 0.41, 1.02, 1.43, 2.05, 3.10, 3.90, 4.92, 6.16, 6.97, 8.2, 9.02, 10.05, and 12.31, respectively. The curve is fit to the function described in the “Derivation” section of this Supporting Information on page S-117 with  $n = 3$ .

| [THF] (M) | $^1J_{\text{N-Si}}$ coupling constant (Hz) | $^{29}\text{Si}$ chemical shift (ppm) |
|-----------|--------------------------------------------|---------------------------------------|
| 1.02      | 8.77                                       | -15.78                                |
| 1.43      | 8.91                                       | -15.81                                |
| 2.05      | 9.13                                       | -16.51                                |
| 3.10      | 9.66                                       | -17.93                                |
| 3.90      | 10.33                                      | -19.14                                |
| 4.92      | 11.29                                      | -20.43                                |
| 6.16      | 12.02                                      | -20.91                                |
| 6.97      | 12.4                                       | -21.22                                |
| 8.20      | 12.67                                      | -21.41                                |
| 9.02      | 12.78                                      | -21.54                                |
| 10.05     | 13.04                                      | -21.63                                |
| 12.31     | 12.94                                      | -21.8                                 |

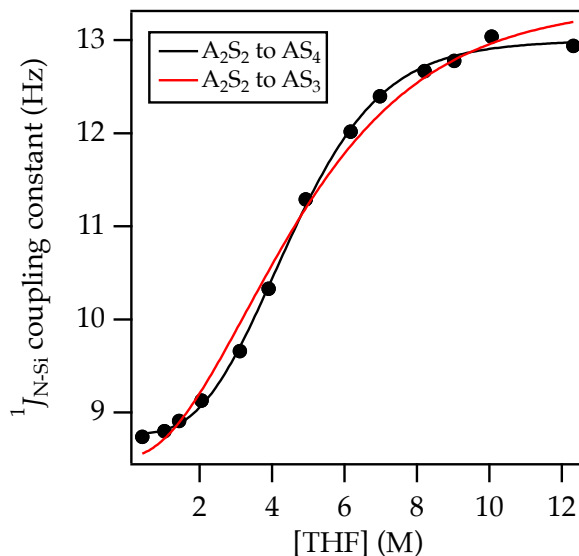

**Figure S40.**  $^{29}\text{Si}$  NMR spectra of 0.10 M NaHMDS in 2:1 pentane/toluene varying the concentration of THF at +20 °C. THF concentration for (a)–(n) are as follows: 0.00, 0.41, 1.02, 1.43, 2.05, 3.10, 3.90, 4.92, 6.16, 6.97, 8.2, 9.02, 10.05, and 12.31, respectively. The difference in curvature for  $n = 2$  (red curve) versus  $n = 3$  (black curve) confirms monomer solvation with a superior fit to the data.

| [THF] (M) | $^1J_{\text{N-Si}}$ coupling constant (Hz) |
|-----------|--------------------------------------------|
| 0.41      | 8.74                                       |
| 1.02      | 8.8                                        |
| 1.43      | 8.91                                       |
| 2.05      | 9.13                                       |
| 3.10      | 9.66                                       |
| 3.90      | 10.33                                      |
| 4.92      | 11.29                                      |
| 6.16      | 12.02                                      |
| 6.97      | 12.4                                       |
| 8.20      | 12.67                                      |
| 9.02      | 12.78                                      |
| 10.05     | 13.04                                      |
| 12.31     | 12.94                                      |

$^{13}\text{C}\{^1\text{H}\}$  spectra

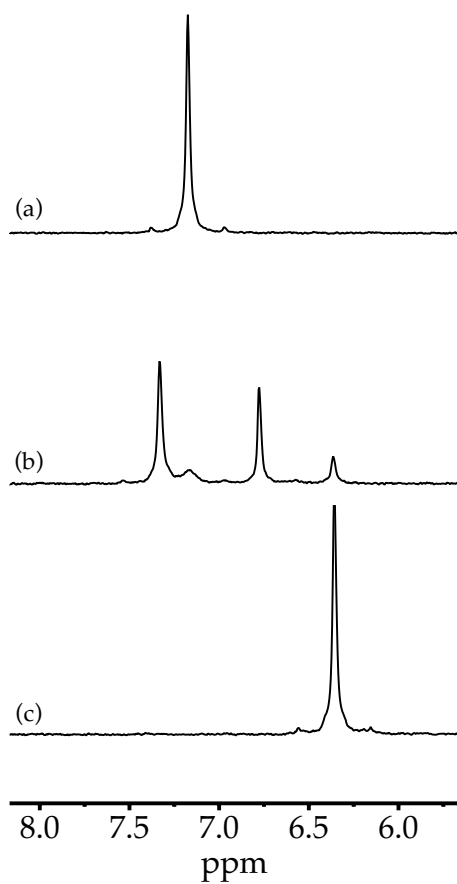

**Figure S41.**  $^{13}\text{C}$  NMR spectra of with mixing NaHMDS and NaTMDS at 0.20 total molarity in 0.85 M THF in toluene- $d_8$  cosolvent at  $-80\text{ }^\circ\text{C}$ . The measured mole fractions,  $X_{\text{NaHMDS}}$ , in (a)–(c) are 1.00, 0.50, and 0.00, respectively.  $^{13}\text{C}$  spectra are referenced relative the toluene ipso-carbon chemical shift (137.86 ppm).

**HMPA (entry n):**

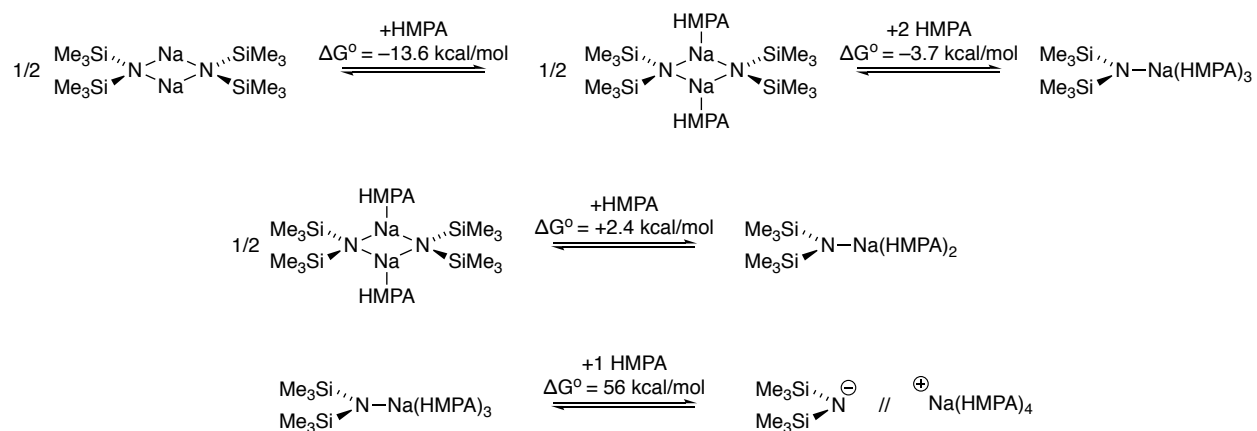

**Figure S42.** Computed free energies for the serial solvation of NaHMDS with HMPA.

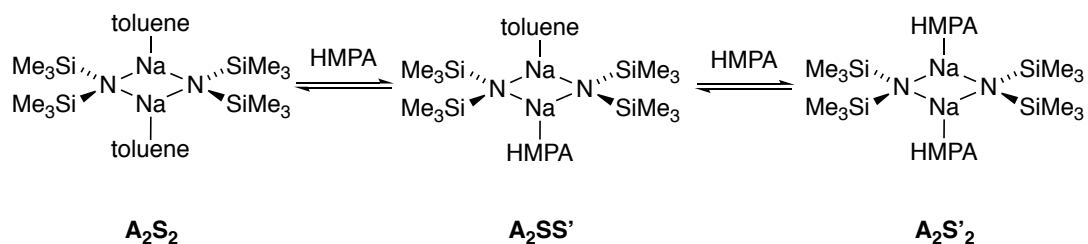

$^{29}\text{Si}\{^1\text{H}\}$  spectra

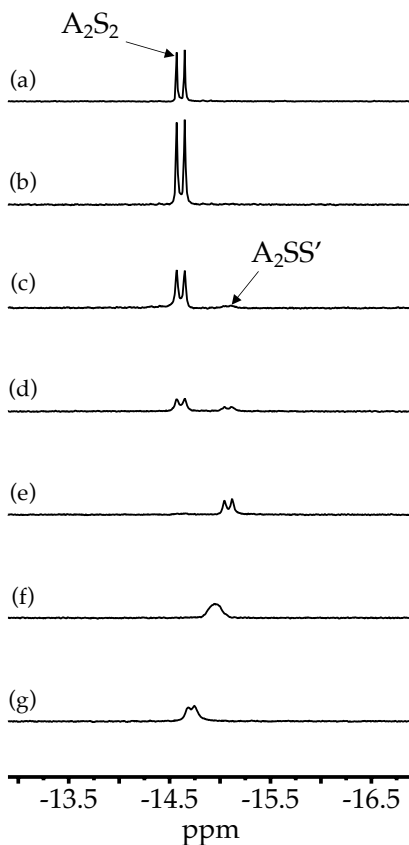

**Figure S43.**  $^{29}\text{Si}\{^1\text{H}\}$  NMR spectra for the titration of 0.10 M NaHMDS in toluene- $d_8$  with HMPA at  $-80^\circ\text{C}$ . Equiv of HMPA for (a)–(g) are as follows: 0.0, 0.03, 0.1, 0.15, 0.31, 0.5, and 1.0, respectively. Time averaged mixed solvate dimer and disolvated HMPA dimer average above 0.5 equiv, which is the reason for the broadening in (f) and (g).  $^{29}\text{Si}$  spectra are referenced to trace HMDS present in tube (2.00 ppm).

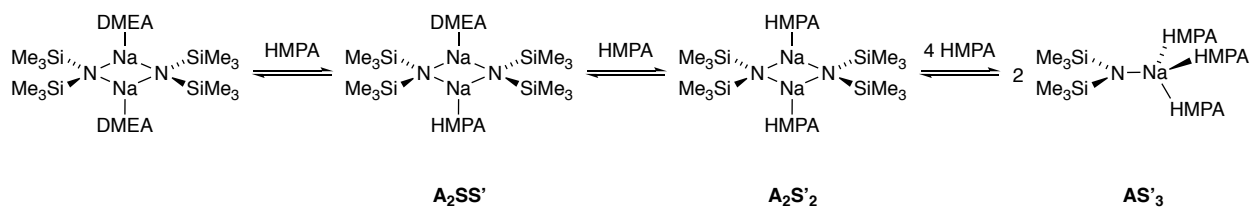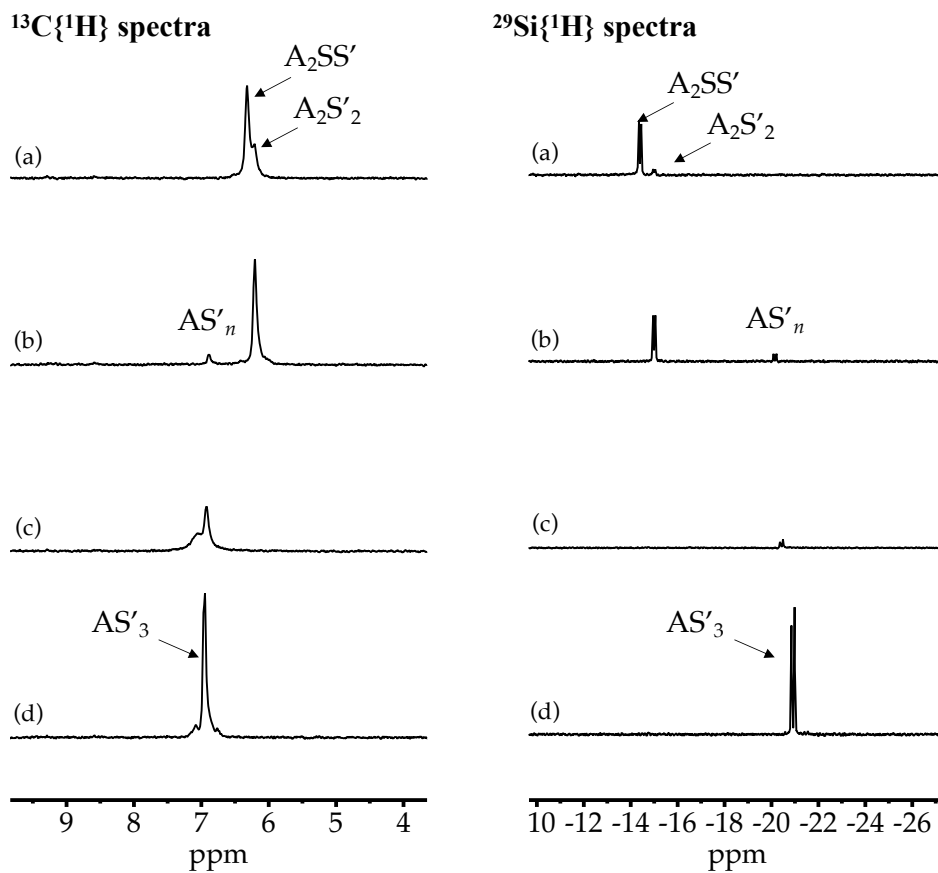

**Figure S44.**  $^{13}\text{C}\{^1\text{H}\}$  and  $^{29}\text{Si}\{^1\text{H}\}$  NMR spectra for the titration of 0.10 M NaHMDS in DMEA with HMPA at  $-120^\circ\text{C}$ . Equiv of HMPA for (a)–(d) are as follows: 0.6, 1.2, 3.0, and 5.0, respectively. The changing signal intensity from (c) to (d) in the  $^{29}\text{Si}$  spectra is due to time averaged solvation states of the monomer.  $^{13}\text{C}$  spectra are referenced relative cyclopentane (26.01 ppm).

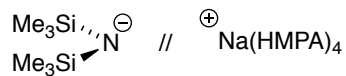

ion pair

### $^{29}\text{Si}\{^1\text{H}\}$ spectra

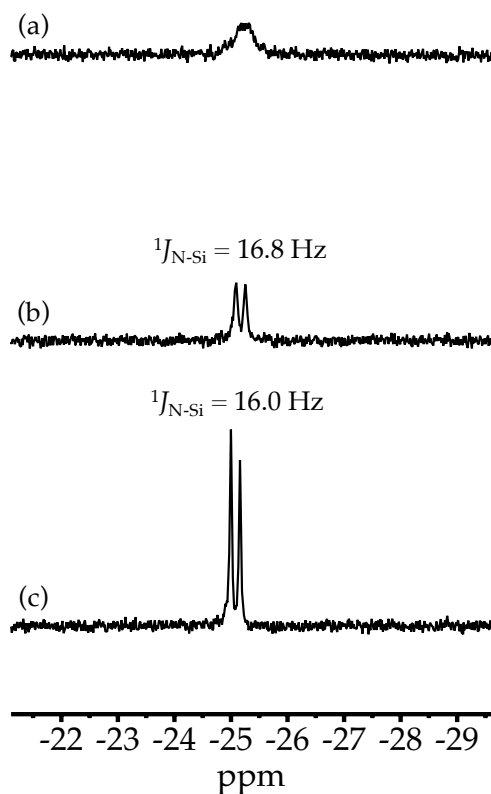

**Figure S45.**  $^{29}\text{Si}\{^1\text{H}\}$  NMR spectra of 0.10 M NaHMDS in 2:1 HMPA:MTBE at various temperatures. Temperatures for (a)–(c) are as follows: 0 °C, 25 °C, and 40 °C, respectively. The large coupling constants in (b) and (c) suggest an ion pair.  $^{29}\text{Si}$  spectra are referenced to TMS (0.00 ppm).



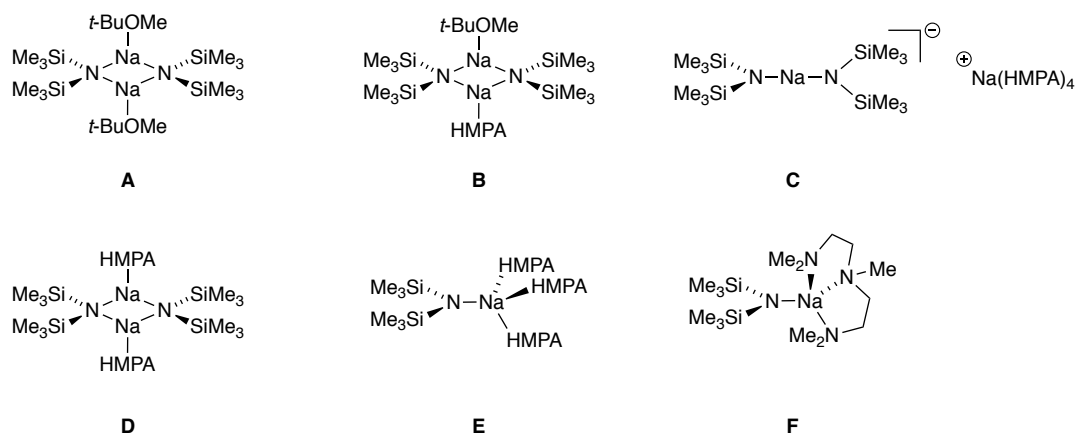

**$^{29}\text{Si}\{^1\text{H}\}$  spectra**

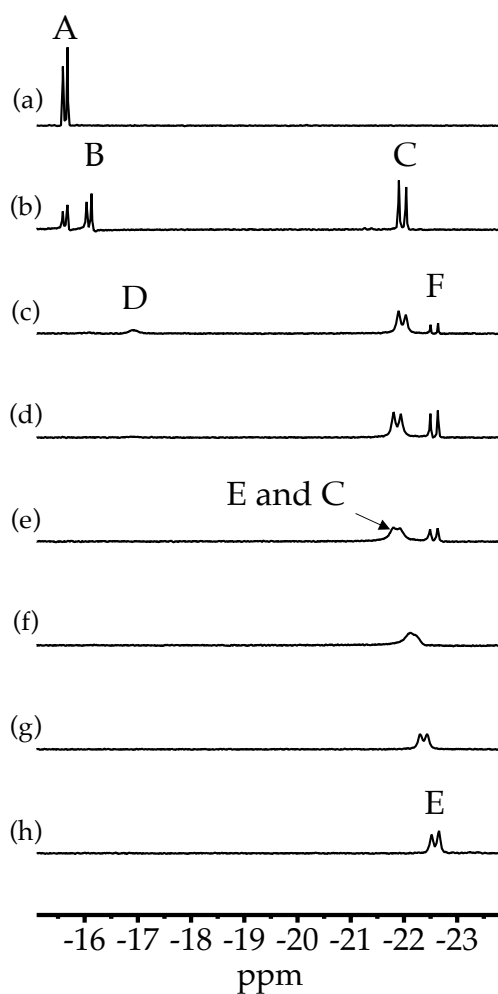

**Figure S46.**  $^{29}\text{Si}$  NMR spectra of 0.20 M  $[\text{}^{15}\text{N}]\text{NaHMDS}$  in MTBE at  $-110\text{ }^\circ\text{C}$  with incremental additions of 1:1 PMDTA/HMPA. The equiv of total added ligand for (a) to (h) are as follows: 0.0, 0.5, 1.0, 1.5, 2.0, 4.0, 6.0, and 10.0, respectively.  $^{29}\text{Si}$  spectra are referenced to TMS internal standard (0.00 ppm).

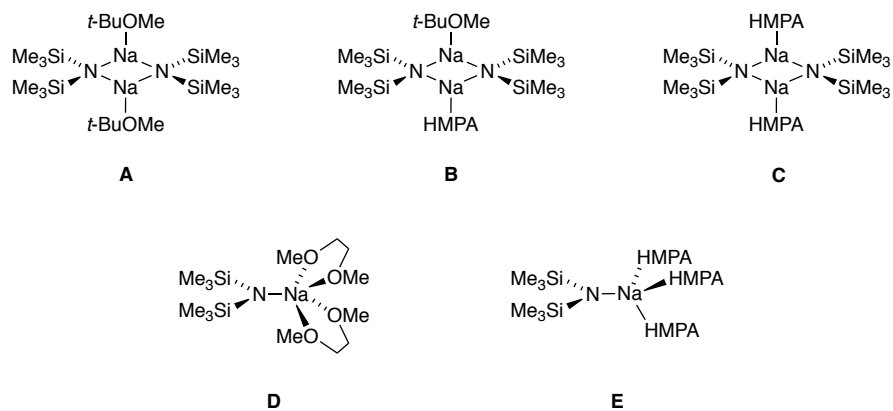

**$^{29}\text{Si}\{^1\text{H}\}$  spectra**

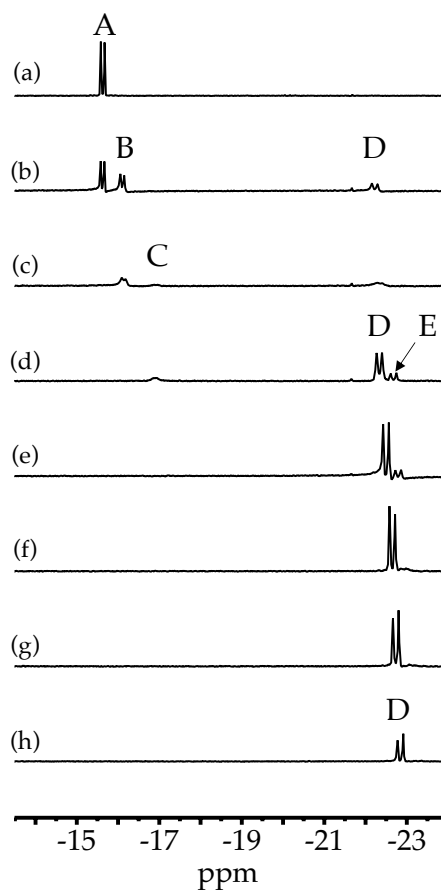

**Figure S47.**  $^{29}\text{Si}$  NMR spectra of 0.20 M  $[^{15}\text{N}]\text{NaHMDS}$  in MTBE at  $-110\text{ }^\circ\text{C}$  with incremental additions of 1:1 DME/HMPA. The equiv of total added ligand for (a) to (h) are as follows: 0.0, 0.5, 1.0, 2.0, 3.0, 4.0, 5.0, and 7.0, respectively.  $^{29}\text{Si}$  spectra are referenced to TMS internal standard (0.00 ppm).

### $^{31}\text{P}\{^1\text{H}\}$ spectra

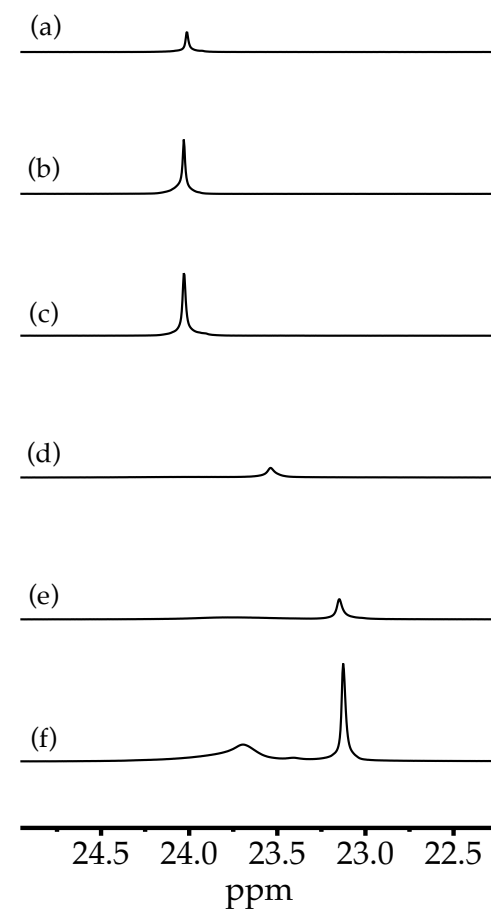

**Figure S48.**  $^{31}\text{P}\{^1\text{H}\}$  NMR spectra of 0.20 M  $[^{15}\text{N}]\text{NaHMDS}$  in 2:1 pentane/toluene with various quantities of HMPA at  $-80\text{ }^\circ\text{C}$ . The equiv of HMPA for (a) to (f) are as follows: 0.3, 0.5, 0.8, 1.0, 2.0, 3.0, and 5.0 respectively.

**DMPU (entry o):**

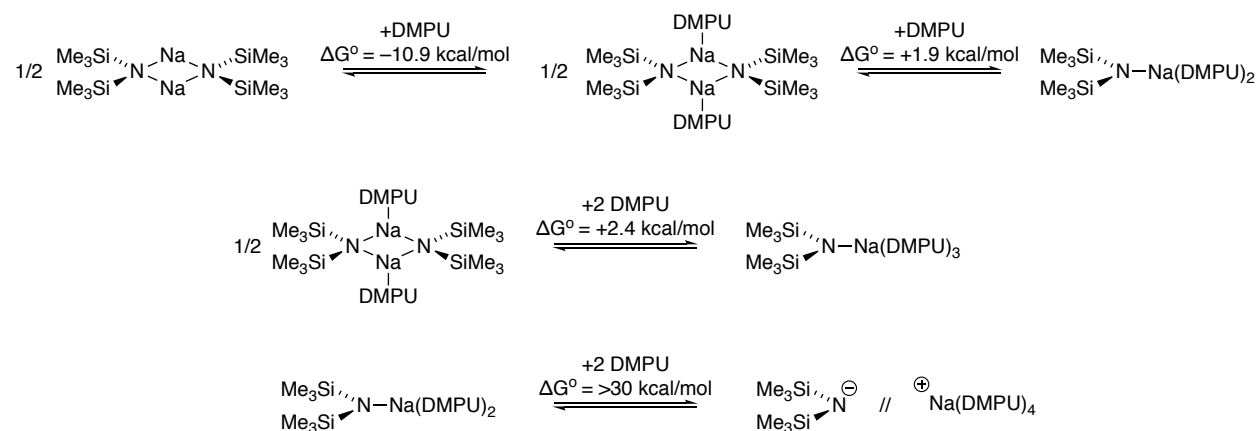

**Figure S49.** Computed free energies for the serial solvation of NaHMDS with DMPU.

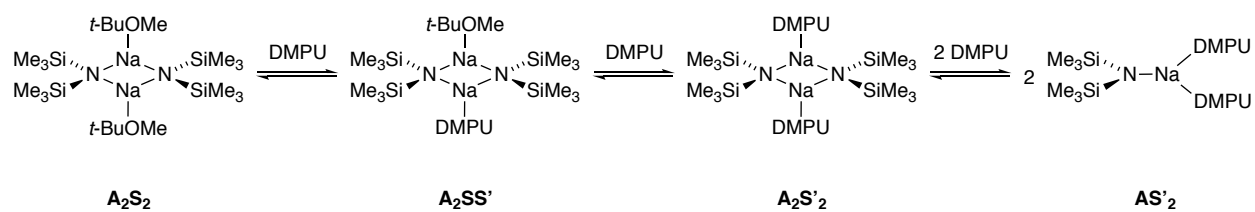

### $^{29}\text{Si}\{^1\text{H}\}$ spectra

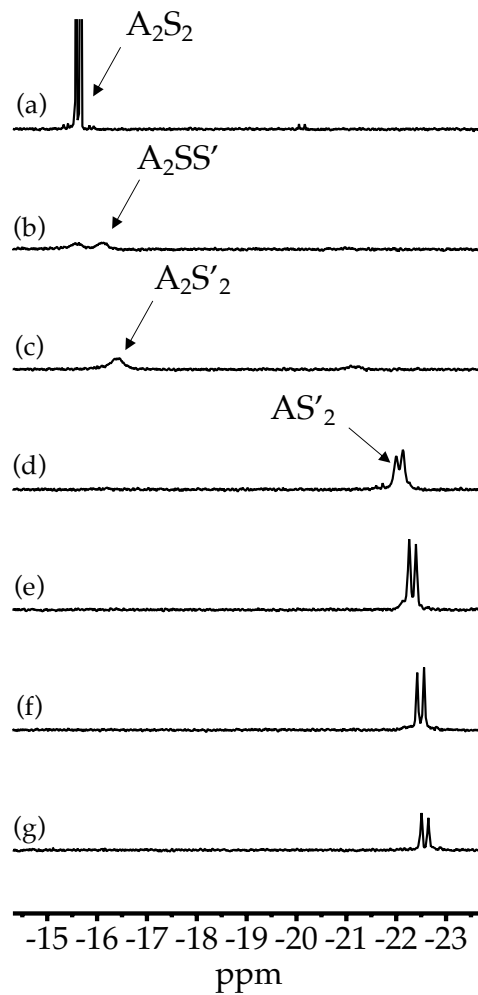

**Figure S50**  $^{29}\text{Si}\{^1\text{H}\}$  NMR spectra for the titration of 0.20 M NaHMDS in MTBE with DMPU at  $-110\text{ }^\circ\text{C}$ . Equiv of DMPU for (a)–(g) are as follows: 0.0, 0.5, 1.0, 2.0, 3.0, 5.0 and 7.0, respectively.  $^{29}\text{Si}$  spectra are referenced to TMS internal standard (0.00 ppm).

**DMF (entry p):**

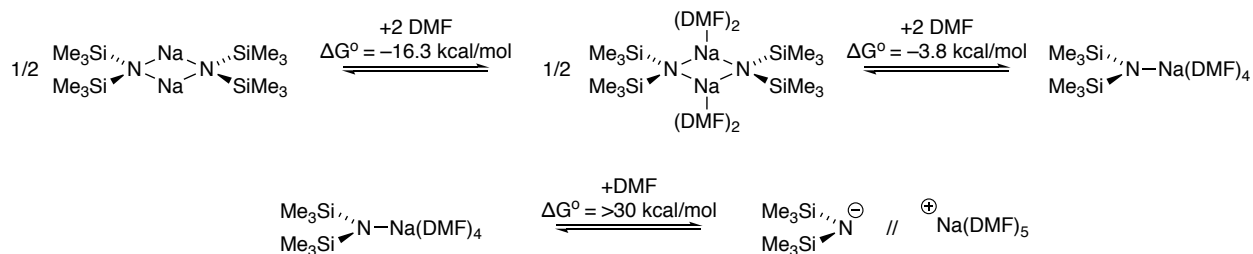

**$^{29}\text{Si}\{^1\text{H}\}$  spectra**

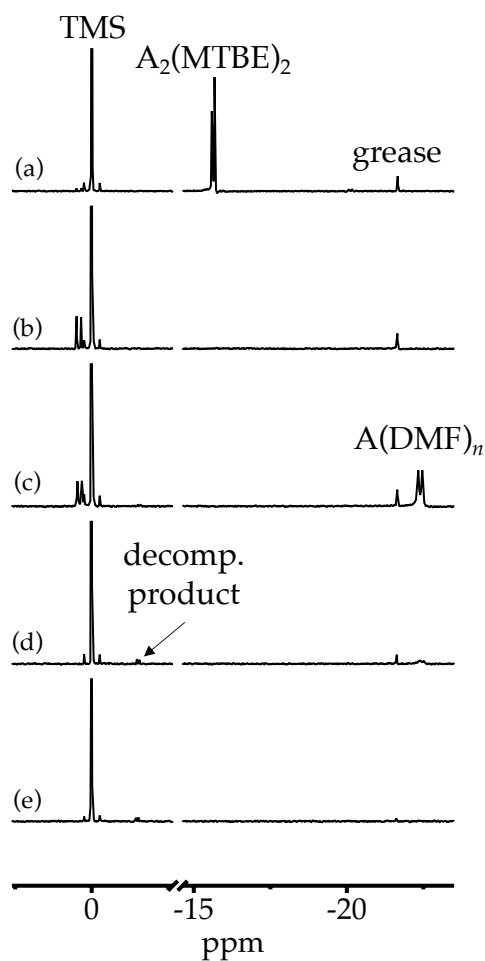

**Figure S51.**  $^{29}\text{Si}\{^1\text{H}\}$  NMR spectra for the titration of 0.20 M NaHMDS in MTBE with DMF at  $-110^\circ\text{C}$ . Equiv of DMF for (a)–(e) are as follows: 0.0, 1.0, 2.0, 4.0, and 7.0, respectively.  $^{29}\text{Si}$  spectra are referenced to TMS internal standard (0.00 ppm).

### DMSO (entry q):

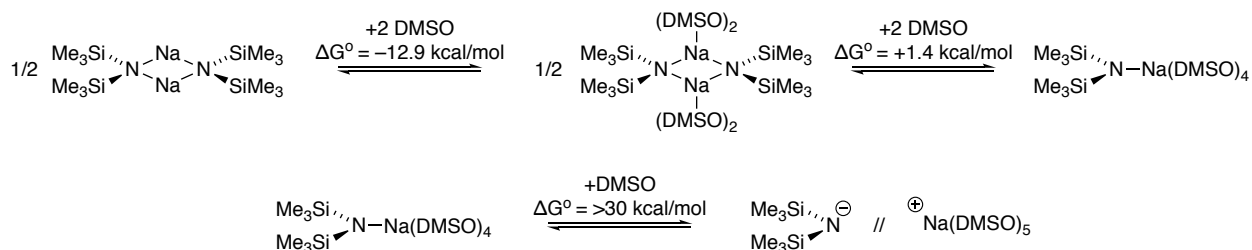

### $^{29}\text{Si}\{^1\text{H}\}$ spectra

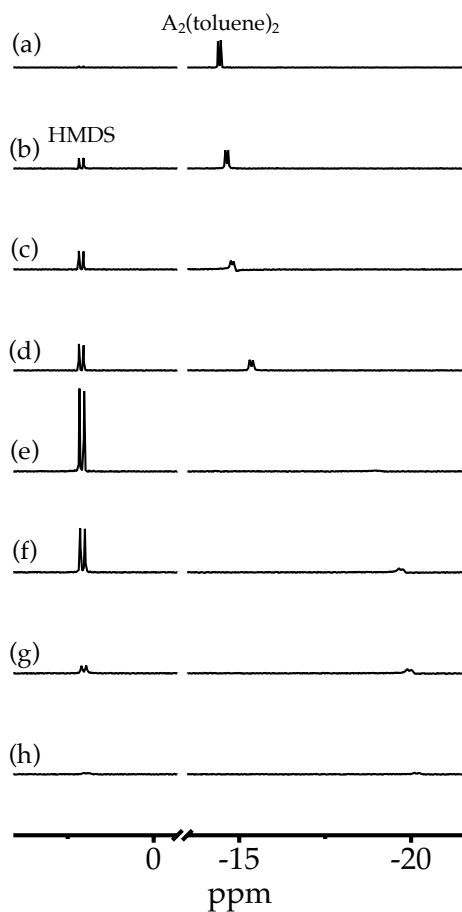

**Figure S52.**  $^{29}\text{Si}\{^1\text{H}\}$  NMR spectra for the titration of 0.10 M NaHMDS in toluene with DMSO at  $-80^\circ\text{C}$ . Equiv of DMSO for (a)–(h) are as follows: 0.0, 0.2, 0.4, 0.8, 0.9, 1.3, 2.0, and 3.0, respectively. The increasing intensity of the HMDS signal is most likely due to the formation of dimsylv sodium.  $^{29}\text{Si}$  spectra are referenced to trace HMDS present in tube (1.78 ppm).

### TMEDA (entry r):

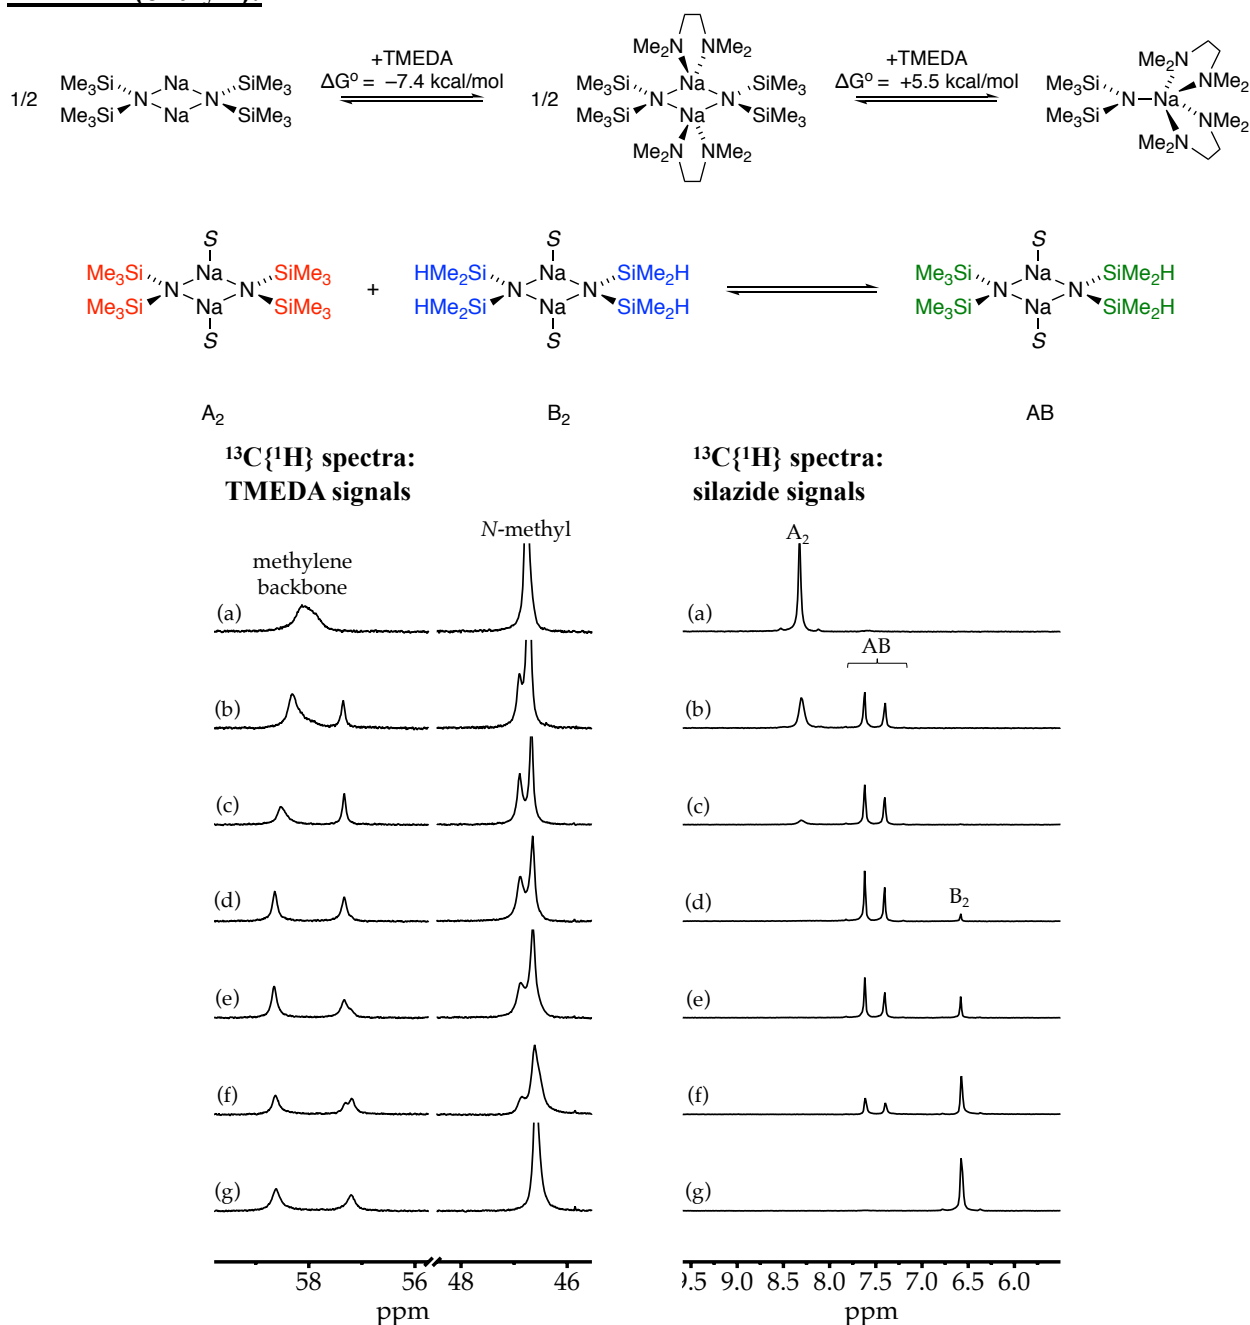

**Figure S53.**  $^{13}\text{C}$  NMR relative integrations of NaHMDS-derived homodimer ( $\text{A}_2$ ), NaTMS-derived homodimer ( $\text{B}_2$ ), and heterodimer ( $\text{AB}$ ) versus the measured mole fraction of NaHMDS ( $X_{\text{NaHMDS}}$ ) at 0.30 total molarity in 0.60 M TMEDA in toluene cosolvent at  $-100^\circ\text{C}$ . The measured mole fractions,  $X_{\text{NaHMDS}}$ , in (a)–(g) are 1.00, 0.80, 0.60, 0.50, 0.40, 0.20, and 0.00, respectively. Free and bound TMEDA is observable for both heterodimer  $\text{AB}$  and NaTMS homodimer  $\text{B}_2$  as evident in the 2 methylene signals. Integration of the more upfield methylene signal results in a 1:1 ratio of for both heterodimer  $\text{AB}$  and NaTMS homodimer  $\text{B}_2$ .  $^{13}\text{C}$  spectra are referenced relative the toluene ipso-carbon chemical shift (137.86 ppm).



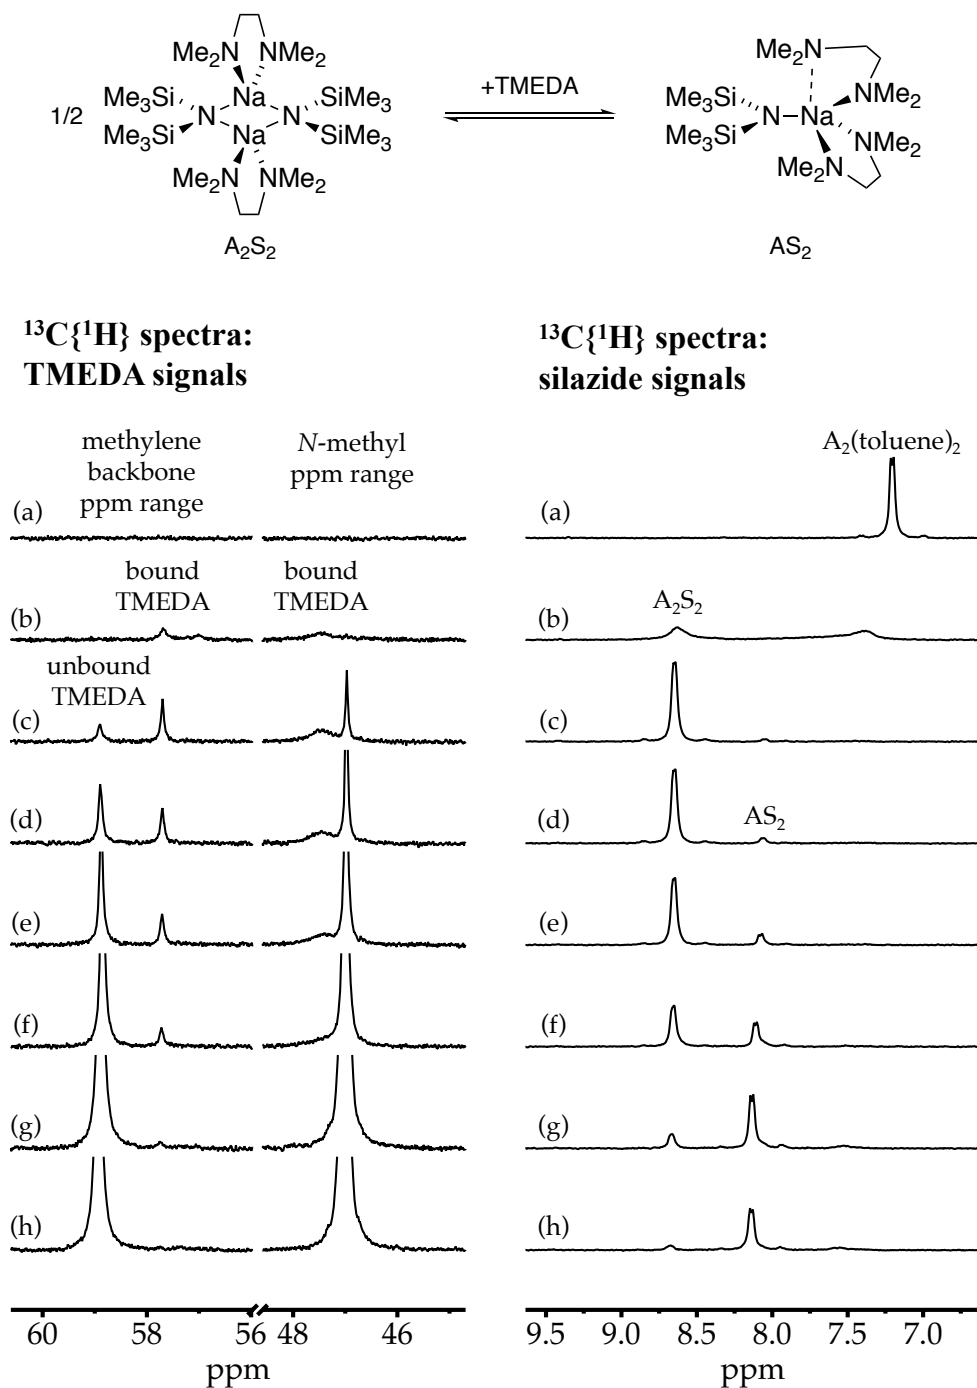

**Figure S54.** <sup>13</sup>C{<sup>1</sup>H} NMR spectra of 0.12 M [<sup>15</sup>N]NaHMDS in 2:1 pentane/toluene-*d*<sub>8</sub> cosolvent with varying amounts of TMEDA added at -120 °C. The equivalents of TMEDA for (a)–(h) are as follows: 0.00, 0.68, 0.89, 1.26, 2.04, 4.00, 7.18, 8.76, and 14.59 equiv, respectively. <sup>13</sup>C spectra are referenced relative the toluene ipso-carbon chemical shift (137.86 ppm).

### $^{29}\text{Si}\{^1\text{H}\}$ spectra

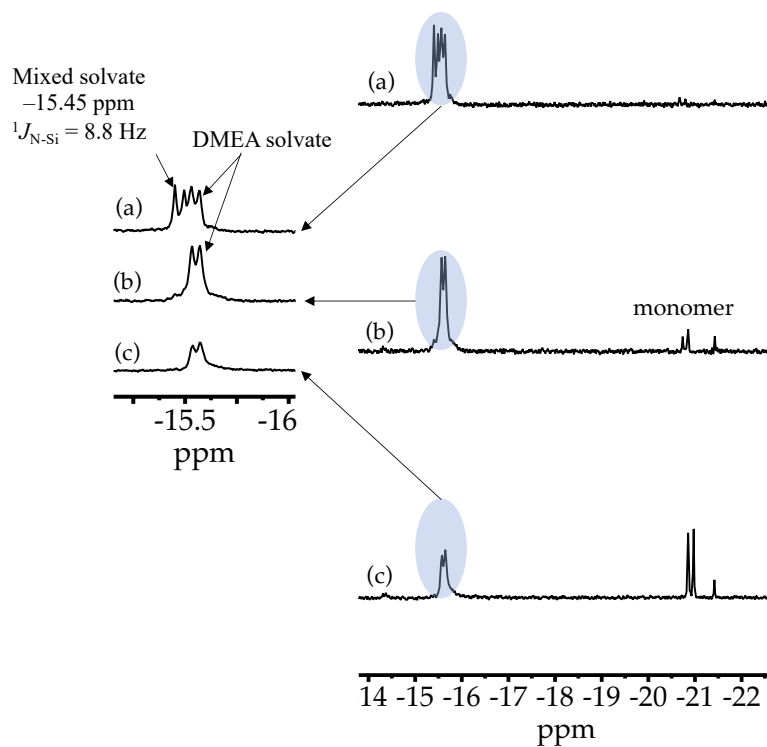

**Figure S55.**  $^{29}\text{Si}$  NMR spectra of 0.15 M  $[^{15}\text{N}]\text{NaHMDS}$  in DMEA cosolvent with varying amounts of TMEDA added at  $-120^\circ\text{C}$ . The equivalents of TMEDA for (a)–(c) are as follows: 0.7, 1.2, and 3.0 equiv, respectively.

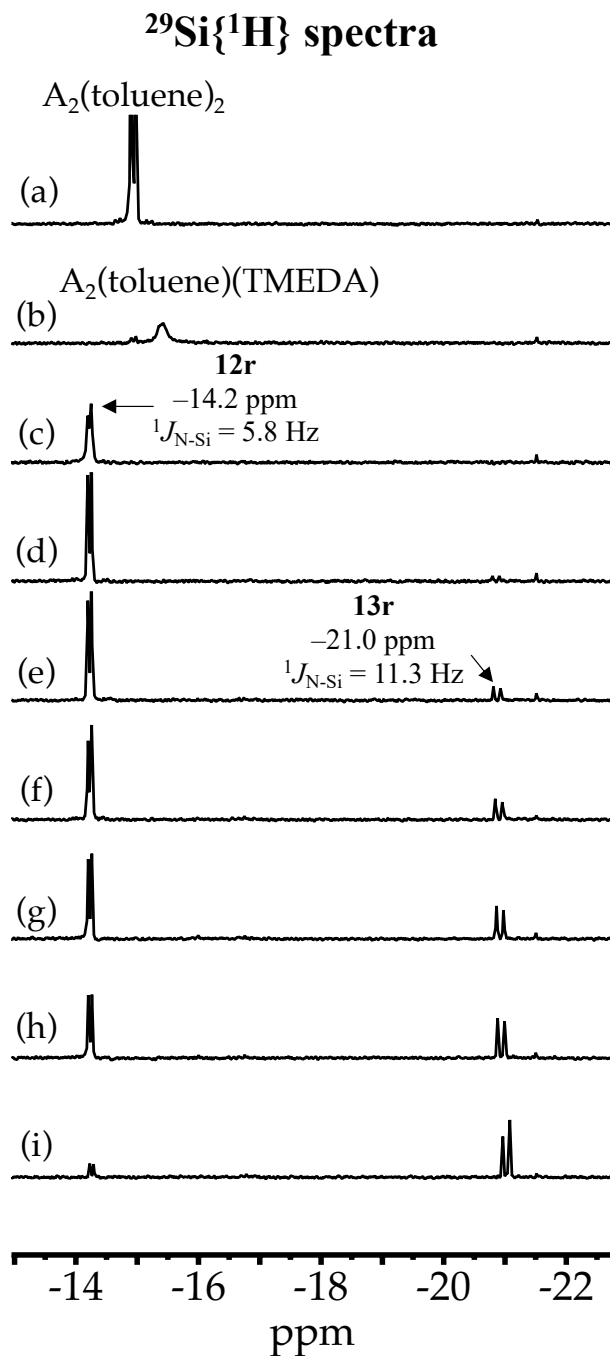

**Figure S56.**  $^{29}\text{Si}\{^1\text{H}\}$  NMR spectra of 0.10 M  $[\text{}^{15}\text{N}]\text{NaHMDS}$  in 2:1 pentane/toluene- $d_8$  cosolvent with varying amounts of TMEDA added at  $-120^\circ\text{C}$ . The equivalents of TMEDA for (a)–(i) are as follows: 0.00, 0.5, 1.0, 1.5, 2.0, 3.0, 4.0, 5.0, and 10.0 equiv, respectively.

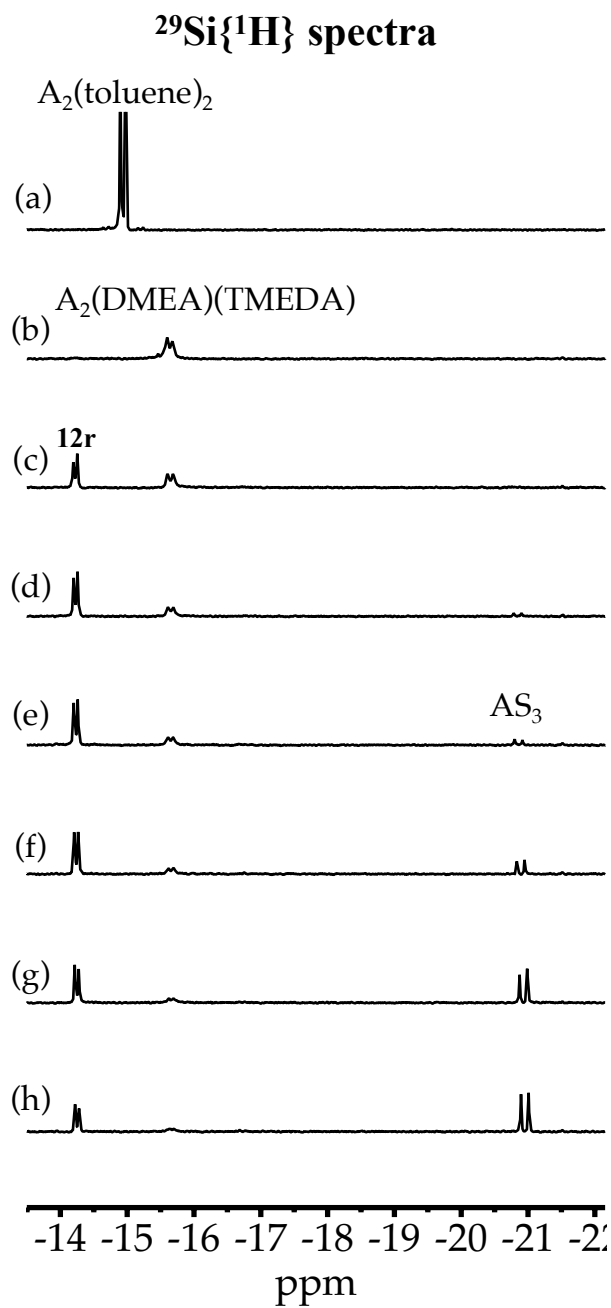

**Figure S57**  $^{29}\text{Si}\{^1\text{H}\}$  NMR spectra of 0.10 M  $[^{15}\text{N}]\text{NaHMDS}$  in 2:1 pentane/toluene at  $-120\text{ }^\circ\text{C}$  with incremental additions of 1:1 TMEDA/DMEA. The equiv of total added ligand from (a)-(h) are 0.0, 1.0, 2.0, 3.0, 4.0, 6.0, 10.0, and 14.0 equiv respectively.

### $^{29}\text{Si}\{^1\text{H}\}$ spectra

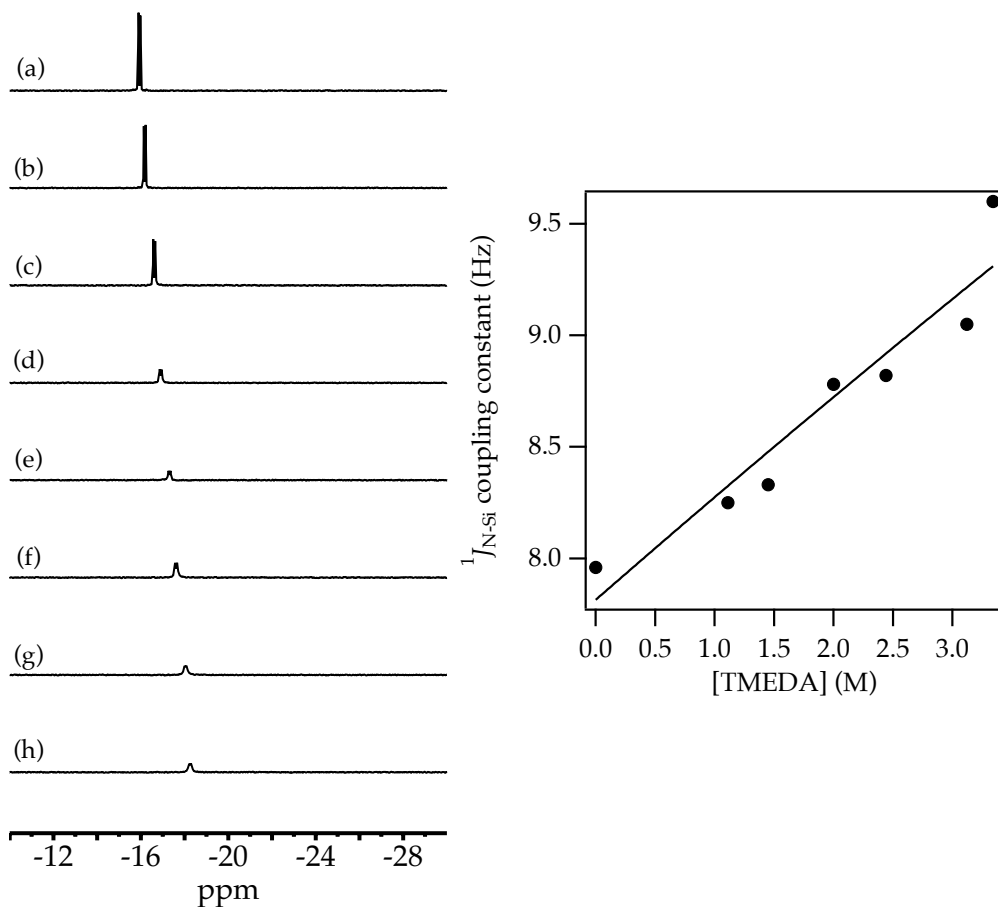

**Figure S58.**  $^{29}\text{Si}\{^1\text{H}\}$  NMR spectra of 0.10 M NaHMDS in 2:1 pentane/toluene varying the concentration of TMEDA at  $-20\text{ }^\circ\text{C}$ . TMEDA concentration for (a)–(h) are as follows: 0.00, 1.11, 1.45, 2.00, 2.44, 3.12, and 3.34, respectively. The curve is fit to the function described in the “Derivation” section of this Supporting Information on page S-117 with  $n = 1$ .

| [TMEDA] (M) | $^1J_{\text{N-Si}}$ coupling constant (Hz) |
|-------------|--------------------------------------------|
| 0.00        | 7.96                                       |
| 1.11        | 8.25                                       |
| 1.45        | 8.33                                       |
| 2.00        | 8.78                                       |
| 2.44        | 8.82                                       |
| 3.12        | 9.05                                       |
| 3.34        | 9.60                                       |

**(R, R)-TMCDA (entry s):**

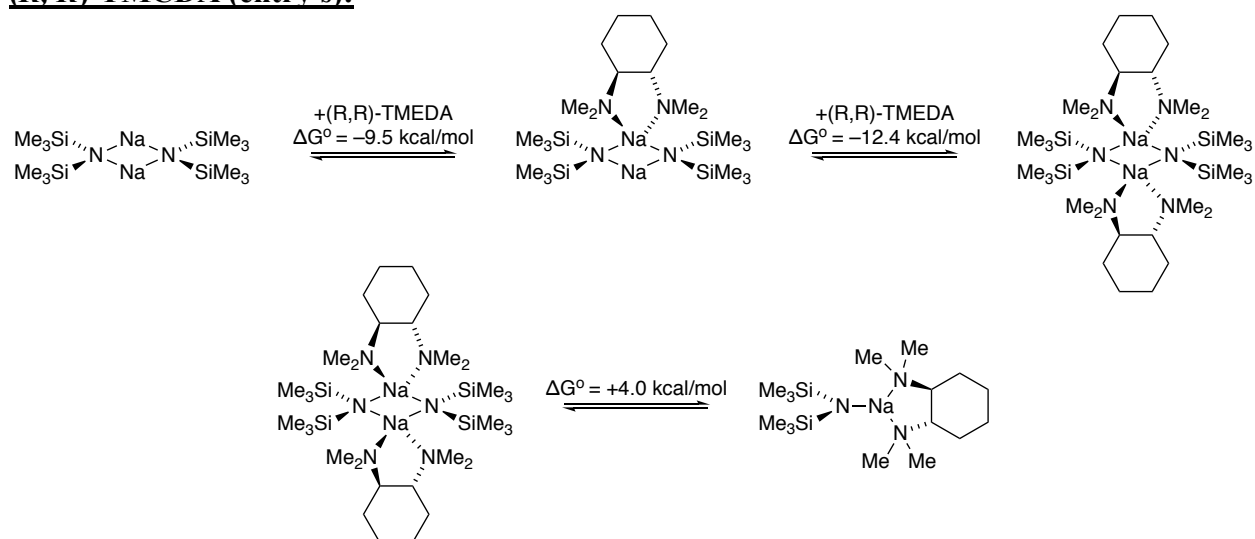

**Figure S59.** Computed free energies for the serial solvation of NaHMDS with TMCDA.

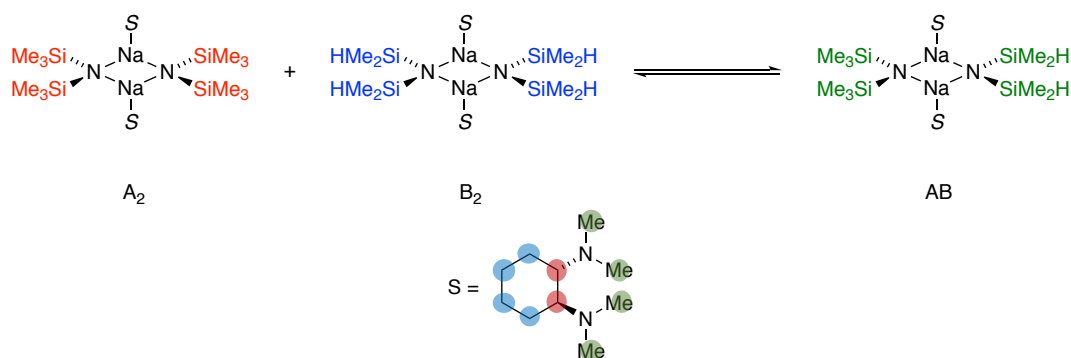

$^{13}\text{C}\{^1\text{H}\}$  spectra:  
TMCDA signals

$^{13}\text{C}\{^1\text{H}\}$  spectra:  
silazide signals

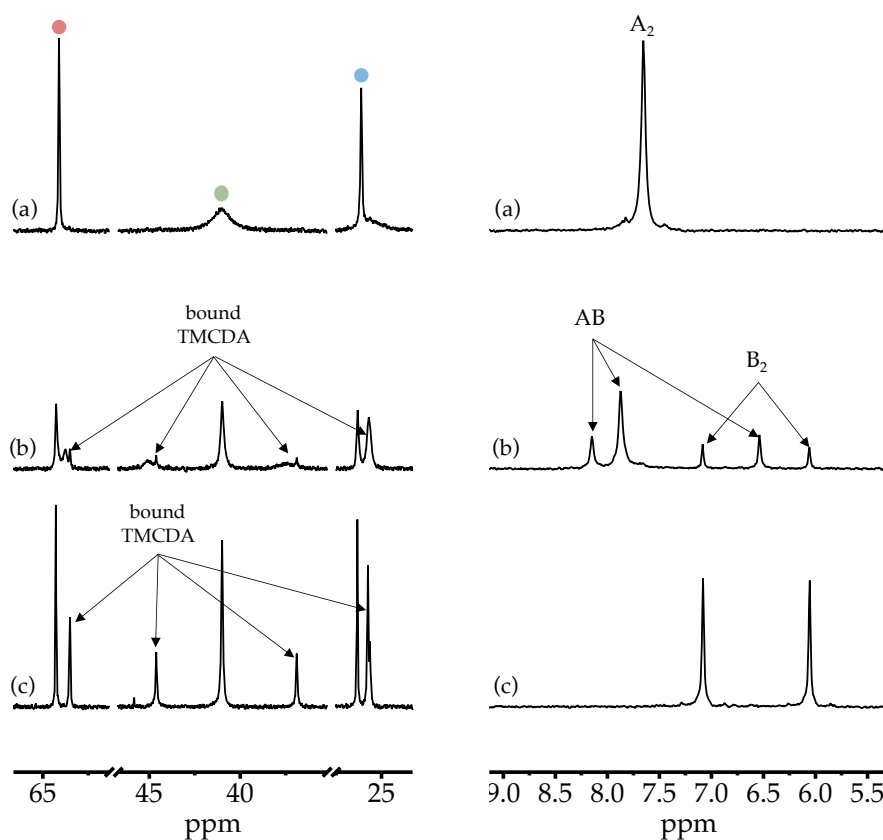

**Figure S60.**  $^{13}\text{C}$  NMR relative integrations of NaHMDS-derived homodimer ( $\text{A}_2$ ), NaTMS-derived homodimer ( $\text{B}_2$ ), and heterodimer ( $\text{AB}$ ) versus the measured mole fraction of NaHMDS ( $X_{\text{NaHMDS}}$ ) at 0.20 total molarity in 0.40 M (*R,R*)-TMCDA in toluene- $d_8$  cosolvent at  $-80^\circ\text{C}$ . The measured mole fractions,  $X_{\text{NaHMDS}}$ , in (a)–(c) are 1.00, 0.50, and 0.00, respectively. Free and bound TMCDA is observable for both heterodimer  $\text{AB}$  and NaTMS homodimer  $\text{B}_2$  as evident in the methylene and methyl signals noted above (methylene = red and blue; methyl = green). Integration of these signals for the NaTMS homodimer shows a 1:1 ratio of silazide to TMCDA.

## $^{29}\text{Si}\{^1\text{H}\}$ spectra

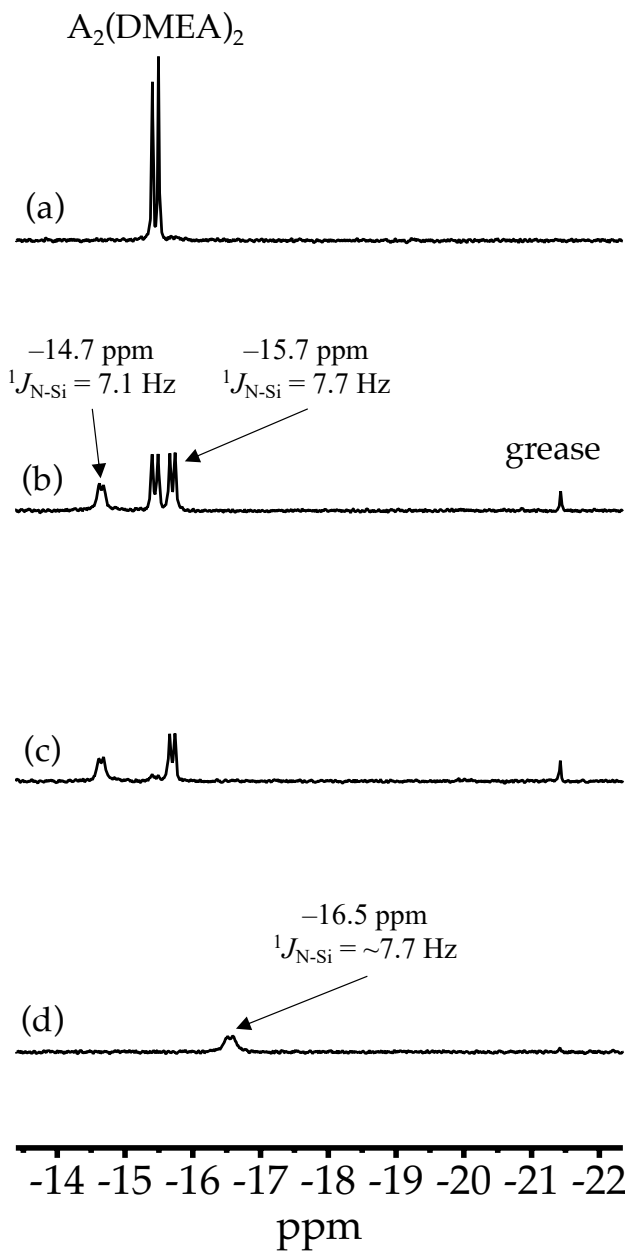

**Figure S61.**  $^{29}\text{Si}$  NMR spectra of 0.15 M  $^{15}\text{N}$ NaHMDS in DMEA cosolvent with varying amounts of TMCDA added at  $-120^\circ\text{C}$ . The equivalents of TMCDA for (a)–(c) are as follows: 0.0, 0.5, and 3.0 equiv, respectively. Spectrum (d) consists of 0.15 M  $^{15}\text{N}$ NaHMDS in neat TMCDA at  $25^\circ\text{C}$ .



**(-)-sparteine (26):**

**$^{29}\text{Si}\{^1\text{H}\}$  spectra**

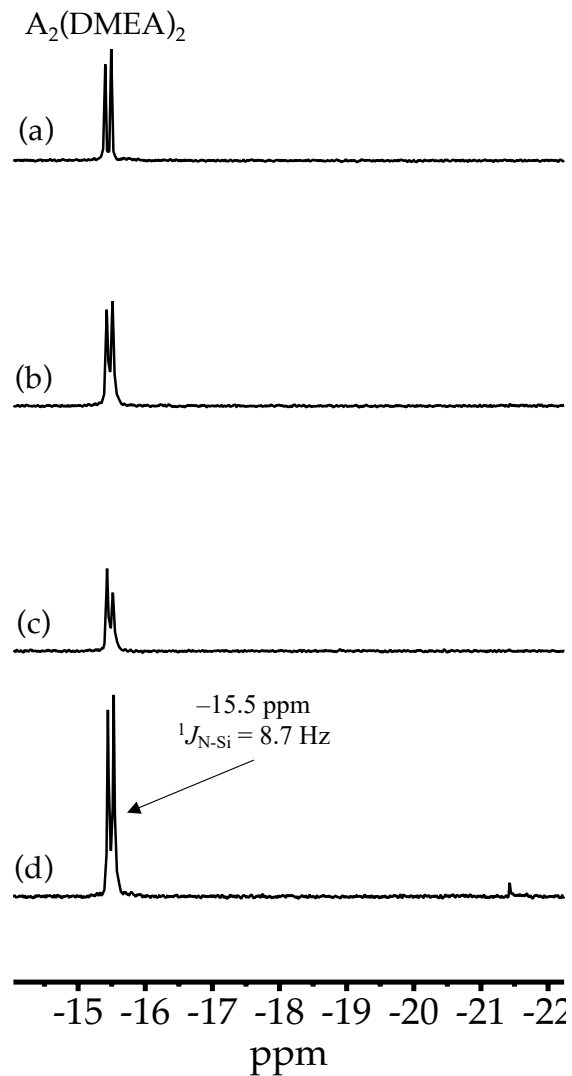

**Figure S62.**  $^{29}\text{Si}$  NMR spectra of 0.15 M  $[^{15}\text{N}]\text{NaHMDS}$  in DMEA cosolvent with varying amounts of sparteine added at  $-120^\circ\text{C}$ . The equivalents of sparteine for (a)–(d) are as follows: 0.0, 0.5, 1.0, and 3.0 equiv, respectively. The shift and coupling constant even with 3.0 equivalents of sparteine indicate a lack of binding to NaHMDS even in trialkylamines.

**bipy (entry u):**

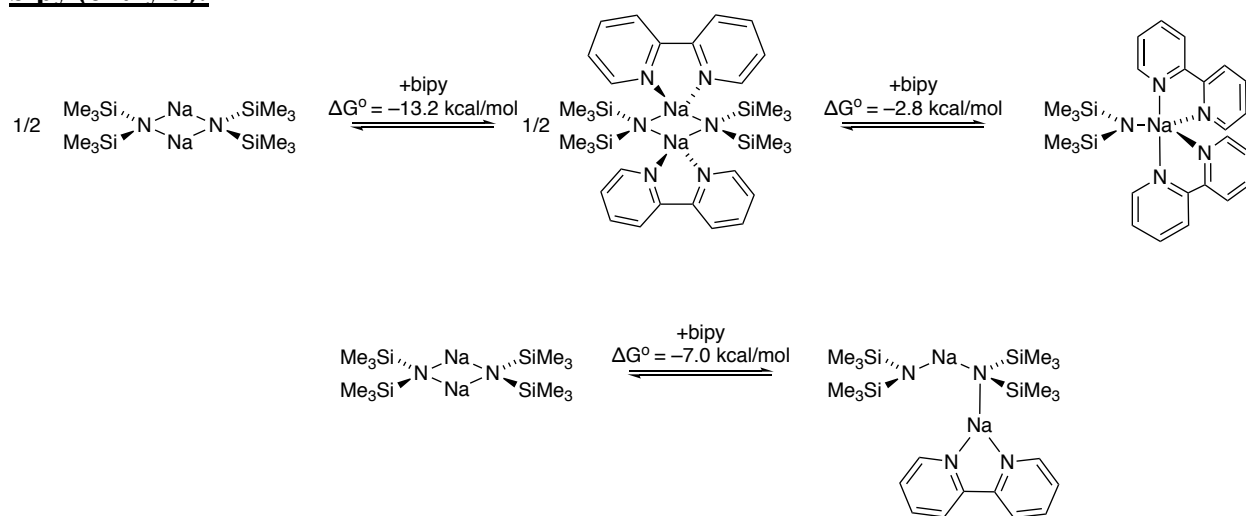

**Figure S63.** Computed free energies for the serial solvation of NaHMDS with bipy.

## $^{29}\text{Si}\{^1\text{H}\}$ spectra

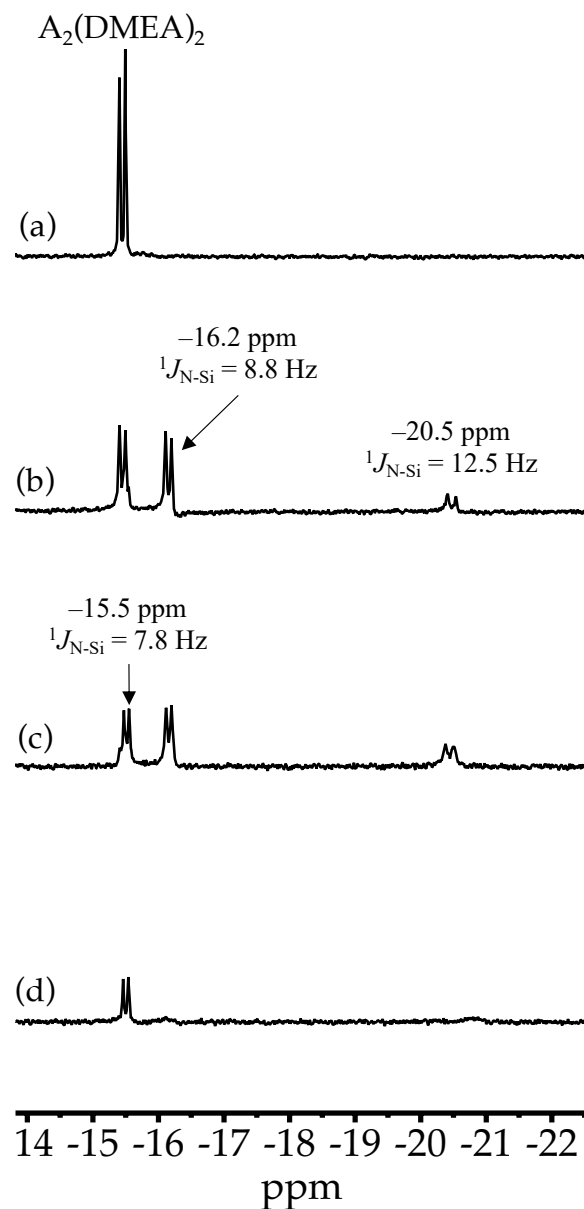

**Figure S64.**  $^{29}\text{Si}$  NMR spectra of 0.10 M  $[^{15}\text{N}]\text{NaHMDS}$  in DMEA cosolvent with varying amounts of bipy added at  $-120^\circ\text{C}$ . The equivalents of bipy for (a)–(d) are as follows: 0.0, 0.5, 1.0, and 3.0 equiv, respectively. Spectra (b) and (c) show DMEA disolvated dimer, bipy disolvated dimer, and a proposed mixed solvated open dimer based on the two most upfield signals.

### DME (entry v):

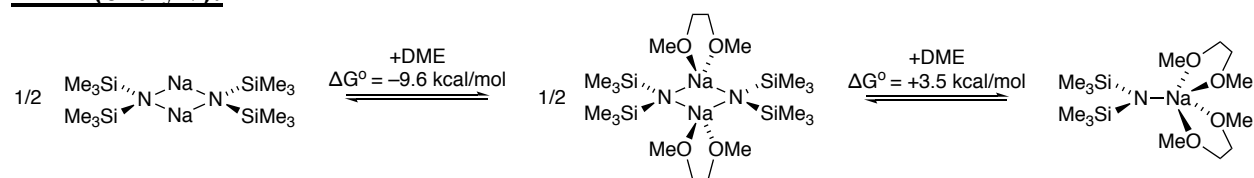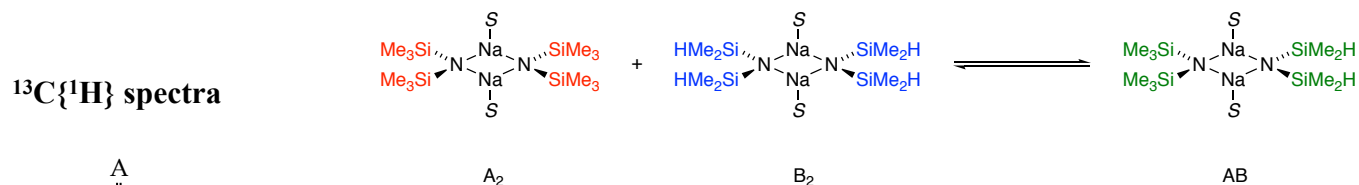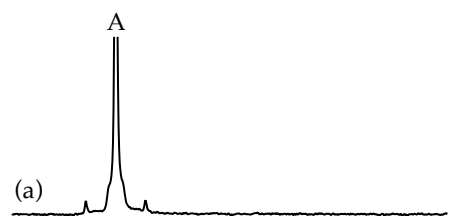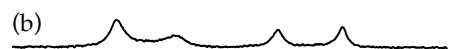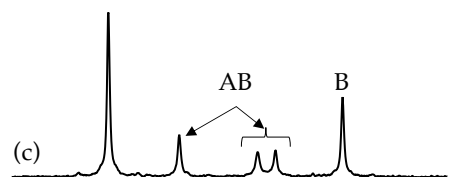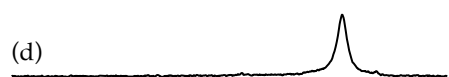

8.0 7.5 7.0 6.5 6.0  
ppm

**Figure S65.**  $^{13}\text{C}$  NMR relative integrations of NaHMDS-derived homodimer ( $A_2$ ), NaTMS-derived homodimer ( $B_2$ ), and heterodimer ( $AB$ ) versus the measured mole fraction of NaHMDS ( $X_{\text{NaHMDS}}$ ) at 0.20 total molarity in 0.40 M DME in toluene cosolvent at  $-80^\circ\text{C}$  or  $-100^\circ\text{C}$  (only spectrum (c)). The measured mole fractions,  $X_{\text{NaHMDS}}$ , in (a)–(d) are 1.00, 0.50, 0.50, and 0.00, respectively.

**$^{29}\text{Si}\{^1\text{H}\}$  spectra**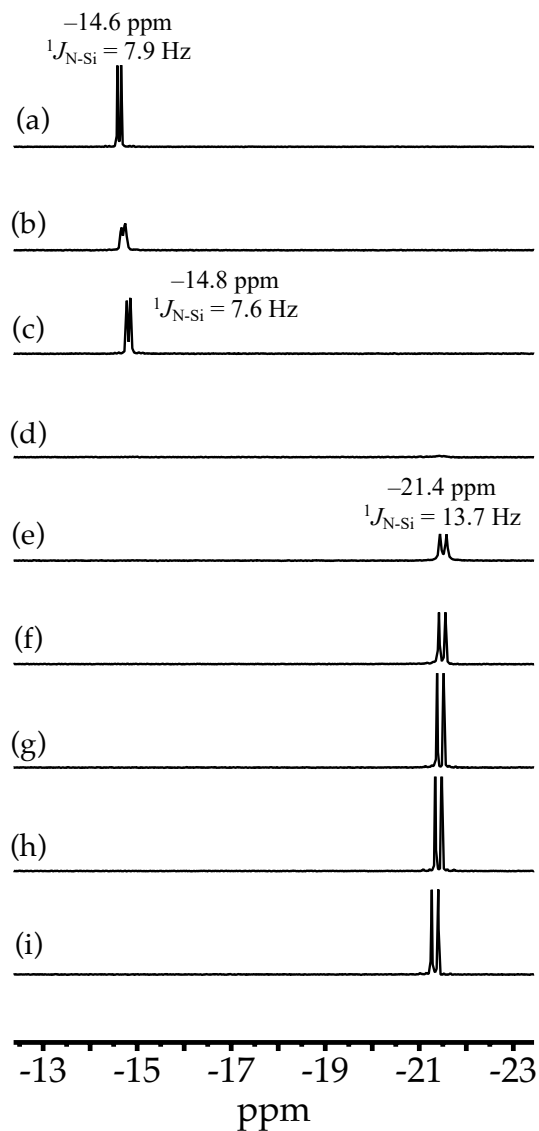 **$^1\text{H}$  spectra**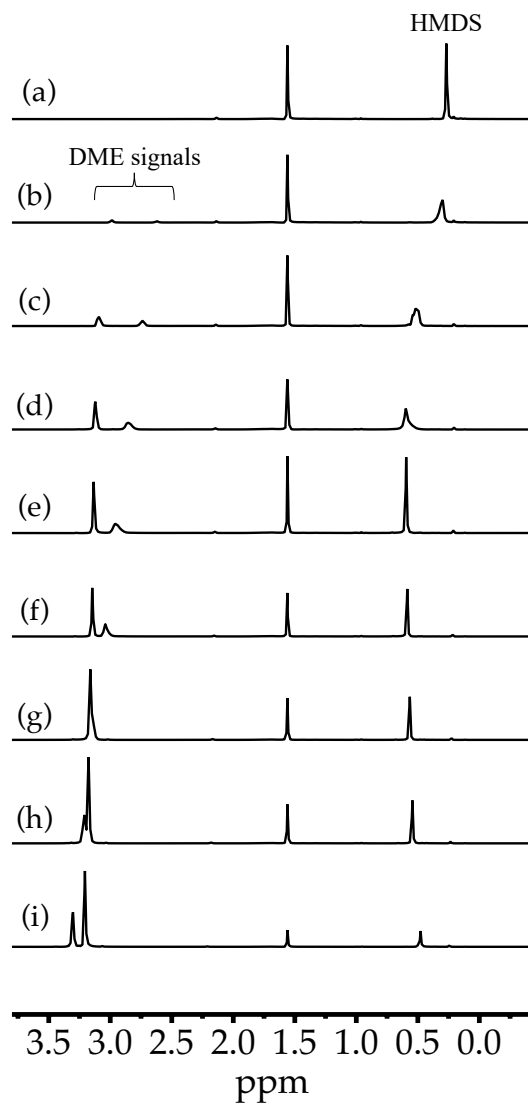

**Figure S66.**  $^1\text{H}$  and  $^{29}\text{Si}\{^1\text{H}\}$  NMR spectra for the titration of 0.20 M  $^{15}\text{N}$ NaHMDS in toluene- $d_8$  with DME at  $-80^\circ\text{C}$ . Equiv of DME for (a)–(i) are as follows: 0.0, 0.2, 0.9, 1.9, 2.8, 3.6, 5.4, 7.4, and 14.0, respectively.

## $^{29}\text{Si}\{^1\text{H}\}$ spectra

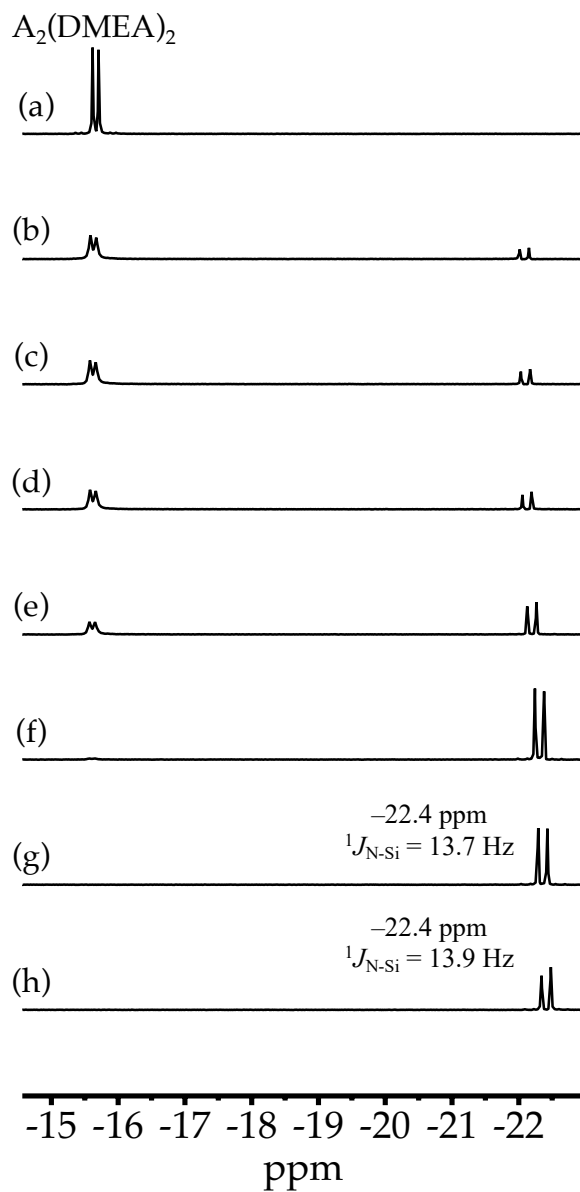

**Figure S67.**  $^{29}\text{Si}$  NMR spectra of 0.20 M  $[^{15}\text{N}]\text{NaHMDS}$  in DMEA cosolvent with varying amounts of DME added at  $-120^\circ\text{C}$ . The equivalents of DME for (a)–(h) are as follows: 0.0, 0.5, 1.0, 1.5, 2.0, 3.0, 4.0, and 7.0 equiv, respectively.

## $^{29}\text{Si}\{^1\text{H}\}$ spectra

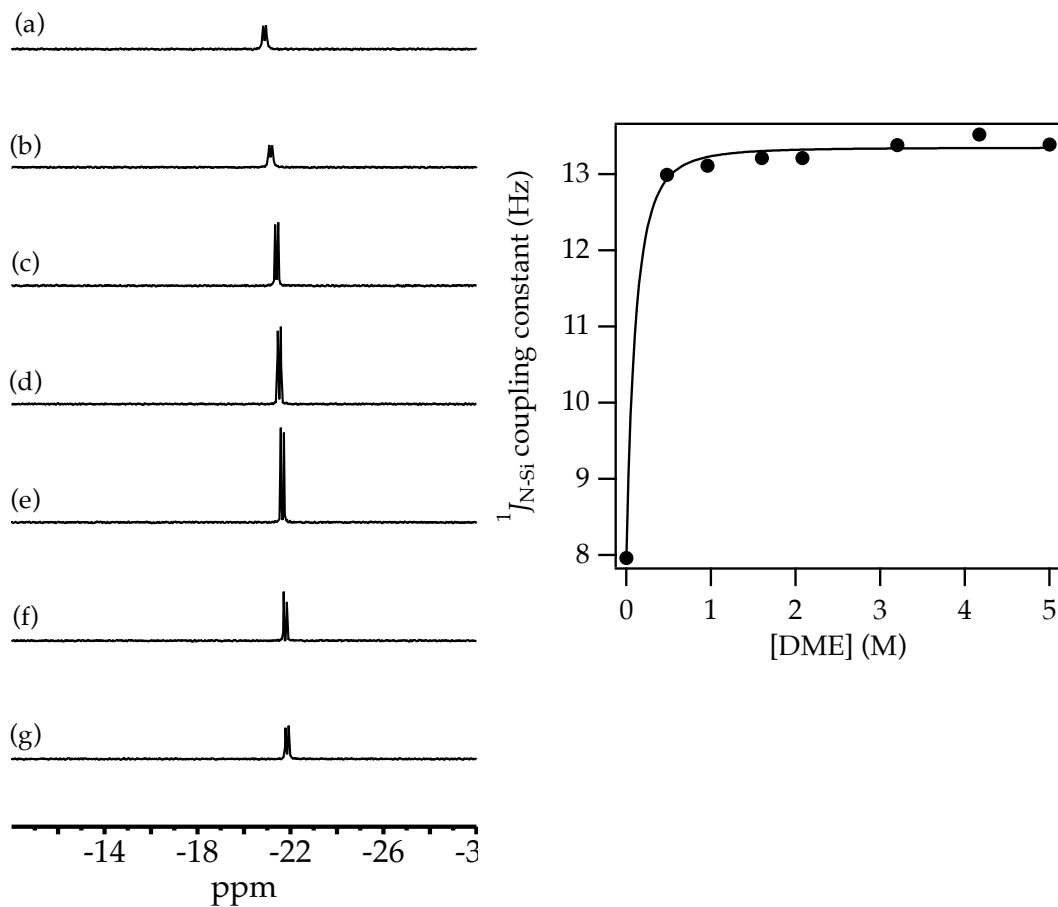

**Figure S68.**  $^{29}\text{Si}\{^1\text{H}\}$  NMR spectra of 0.10 M NaHMDS in 2:1 pentane/toluene varying the concentration of DME at  $-20\text{ }^\circ\text{C}$ . DME concentrations for (a)–(g) are as follows: 0.48, 0.96, 1.60, 2.08, 3.20, 4.17, and 5.00, respectively. The curve is fit to the function described in the “Derivation” section of this Supporting Information on page S-117 with  $n = 1$ .

| [TMEDA] (M) | $^1J_{\text{N-Si}}$ coupling constant (Hz) |
|-------------|--------------------------------------------|
| 0.00        | 7.96                                       |
| 0.48        | 12.95                                      |
| 0.96        | 13.08                                      |
| 1.60        | 13.22                                      |
| 2.08        | 13.19                                      |
| 3.20        | 13.40                                      |
| 4.17        | 13.52                                      |
| 5.00        | 13.35                                      |

## $^{29}\text{Si}\{^1\text{H}\}$ spectra

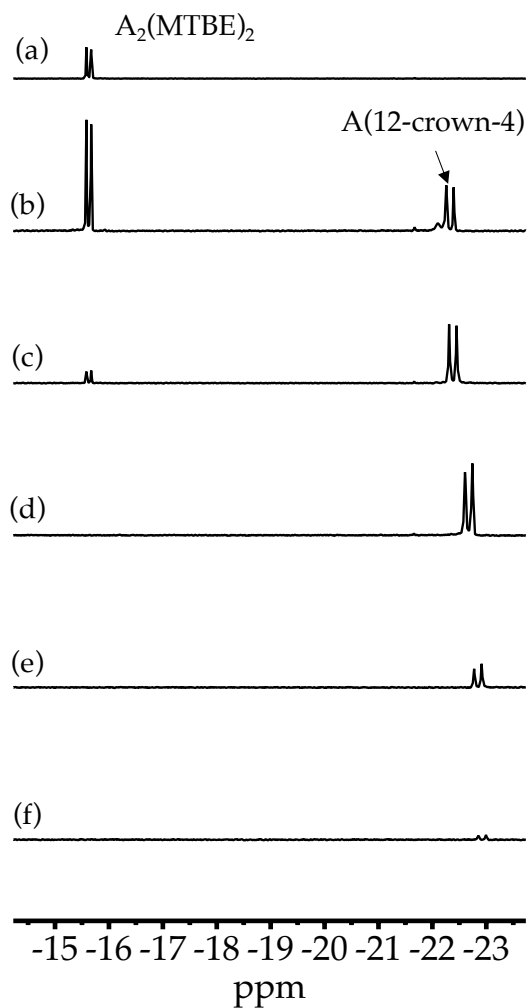

**Figure S69.**  $^{29}\text{Si}$  NMR spectra of 0.20 M  $[^{15}\text{N}]\text{NaHMDS}$  in MTBE at  $-110\text{ }^\circ\text{C}$  with incremental additions of 1:1 DME/12-crown-4. The equiv of total added ligand for (a)–(f) are as follows: 0.0, 0.5, 1.0, 2.0, 4.0, and 6.0 total equiv, respectively. Loss of signal in (f) is due to preferential crown binding and subsequent precipitation of this crown complex.



**NIPA (26):**

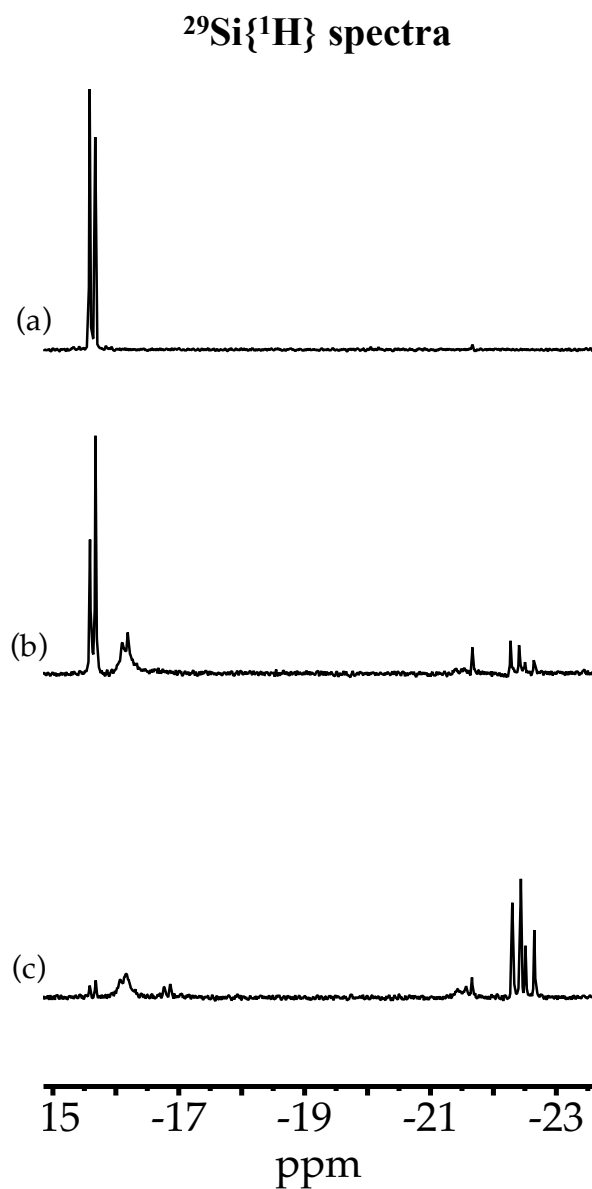

**Figure S70.**  $^{29}\text{Si}$  NMR spectra of 0.20 M  $[^{15}\text{N}]\text{NaHMDS}$  in MTBE at  $-110\text{ }^\circ\text{C}$  with incremental additions NIPA. The equiv of total NIPA for (a)–(c) are as follows: 0.0, 0.5, and 1.0 equiv, respectively. A white precipitate was present at the bottom of the NMR tube following the final addition of NIPA.

**PMDTA (entry v):**

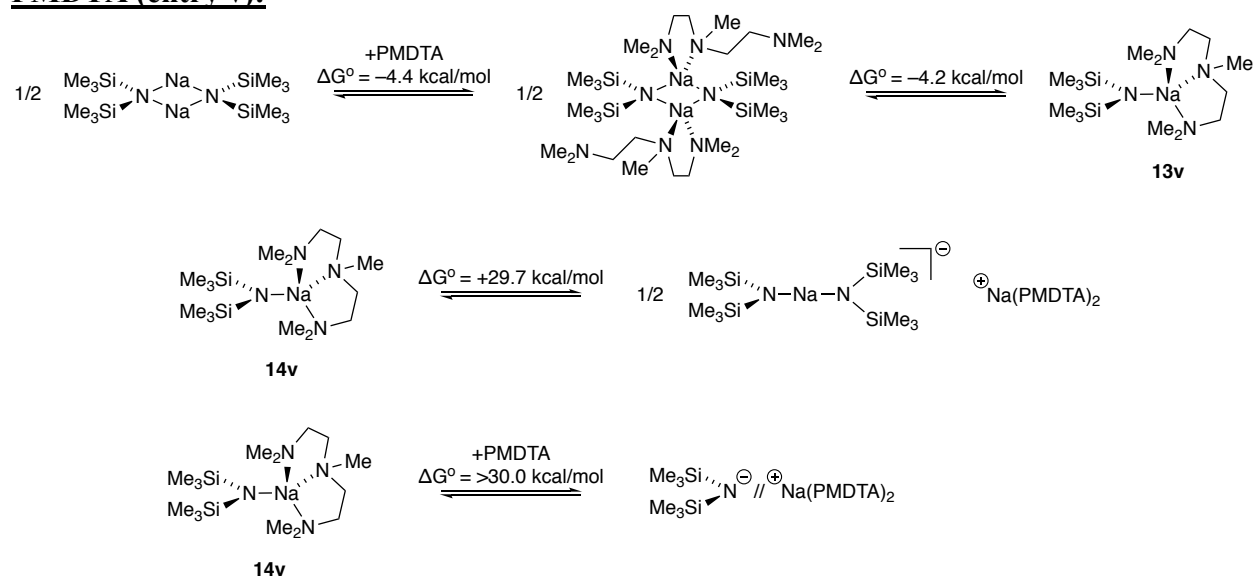

$^{29}\text{Si}\{^1\text{H}\}$  spectrum

$^{13}\text{C}\{^1\text{H}\}$  spectrum

$^{15}\text{N}\{^1\text{H}\}$  spectrum

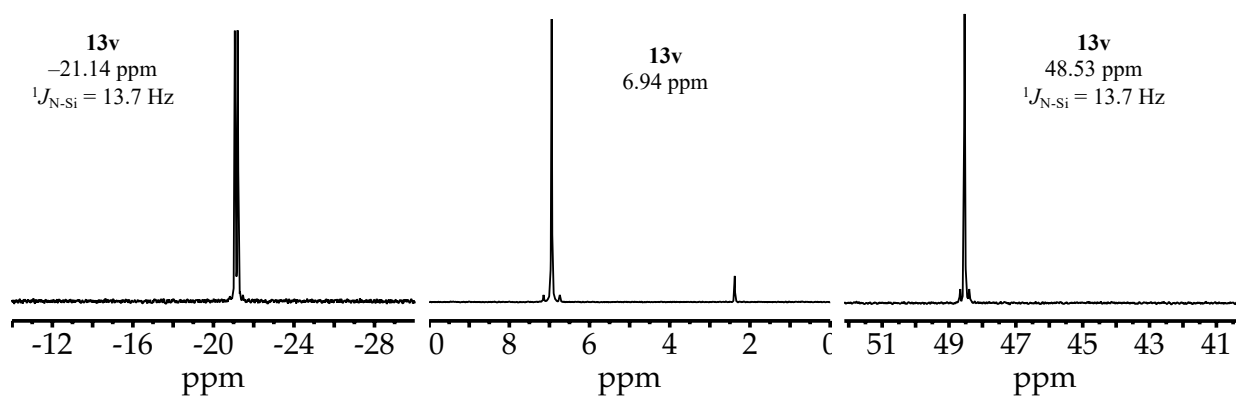

**Figure S71.** NMR spectra of  $[\text{}^{15}\text{N}]\text{NaHMDS}$  ( $^{29}\text{Si}$  and  $^{15}\text{N}$ ) and  $\text{NaHMDS}$  ( $^{13}\text{C}$ ) with at least 2 equiv PMDTA per sodium in toluene- $d_8$  cosolvent at  $-80^\circ\text{C}$ . Concentrations vary from 0.20 M  $\text{NaHMDS}$  ( $^{15}\text{N}$ ) to 0.30 M  $\text{NaHMDS}$  ( $^{29}\text{Si}$  and  $^{13}\text{C}$ ).

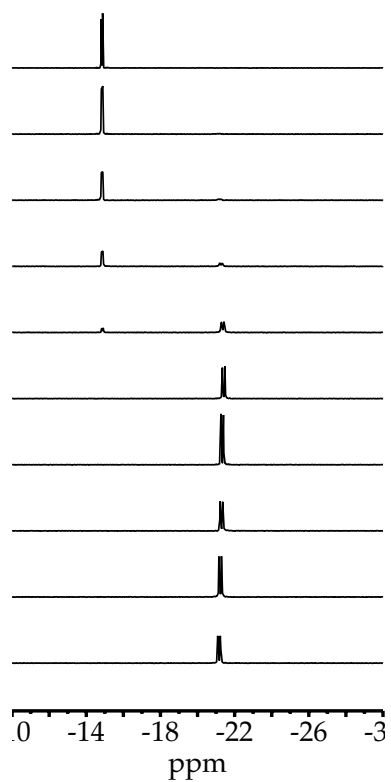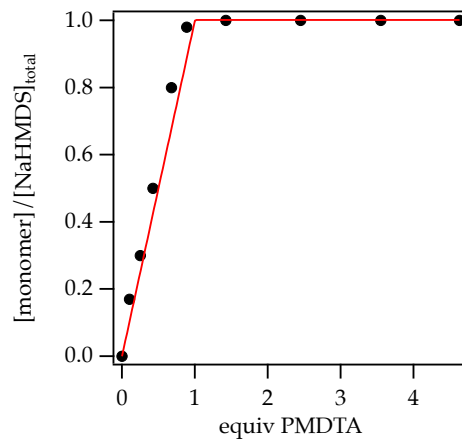

**Figure S72.**  $^{29}\text{Si}$  NMR spectra for 0.30 M solution of NaHMDS in toluene- $d_8$  with varying [PMDTA] at  $-80^\circ\text{C}$  and cyclopentane as an internal standard. The plot corresponds to the monomer concentration as a function equivalents of PMDTA added.

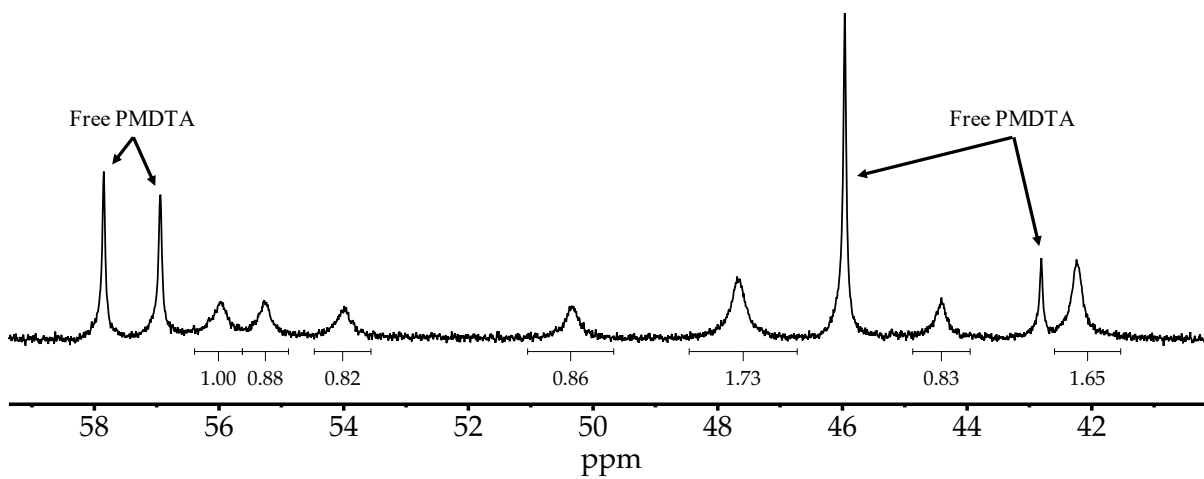

**Figure S73.**  $^{13}\text{C}$  NMR spectrum highlighting PMDTA in the slow-exchange limit under the following conditions: 0.30 M NaHMDS in 1:1 pentane/toluene- $d_8$  cosolvent with 2.0 equiv of added PMDTA at  $-120\text{ }^\circ\text{C}$ .

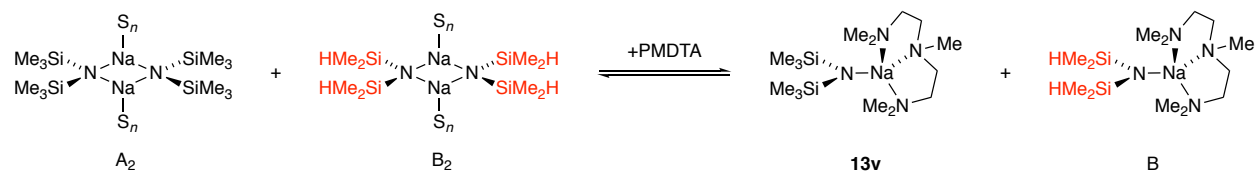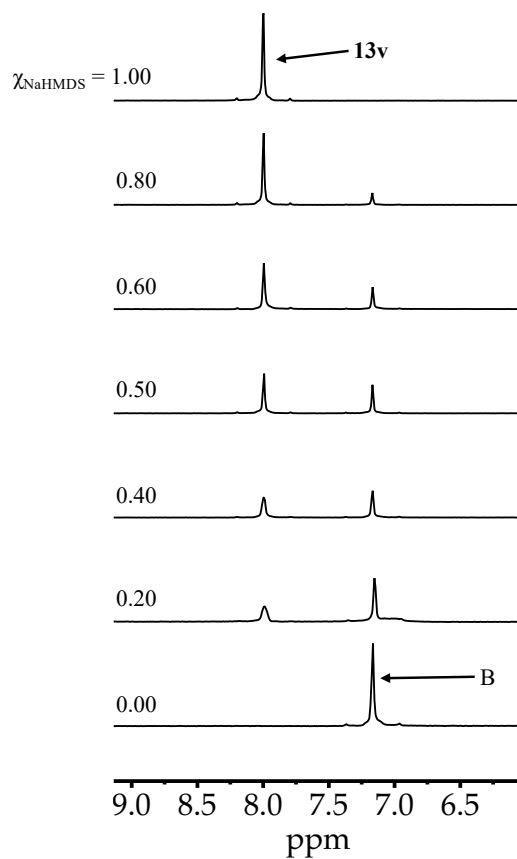

**Figure S74.**  $^{13}\text{C}\{^1\text{H}\}$  NMR spectra for 0.30 M solutions of NaHMDS and NaTMDs in toluene- $d_8$  with at the indicated mole fractions ( $\chi_{\text{NaHMDS}}$ ) at  $-80\text{ }^\circ\text{C}$ .

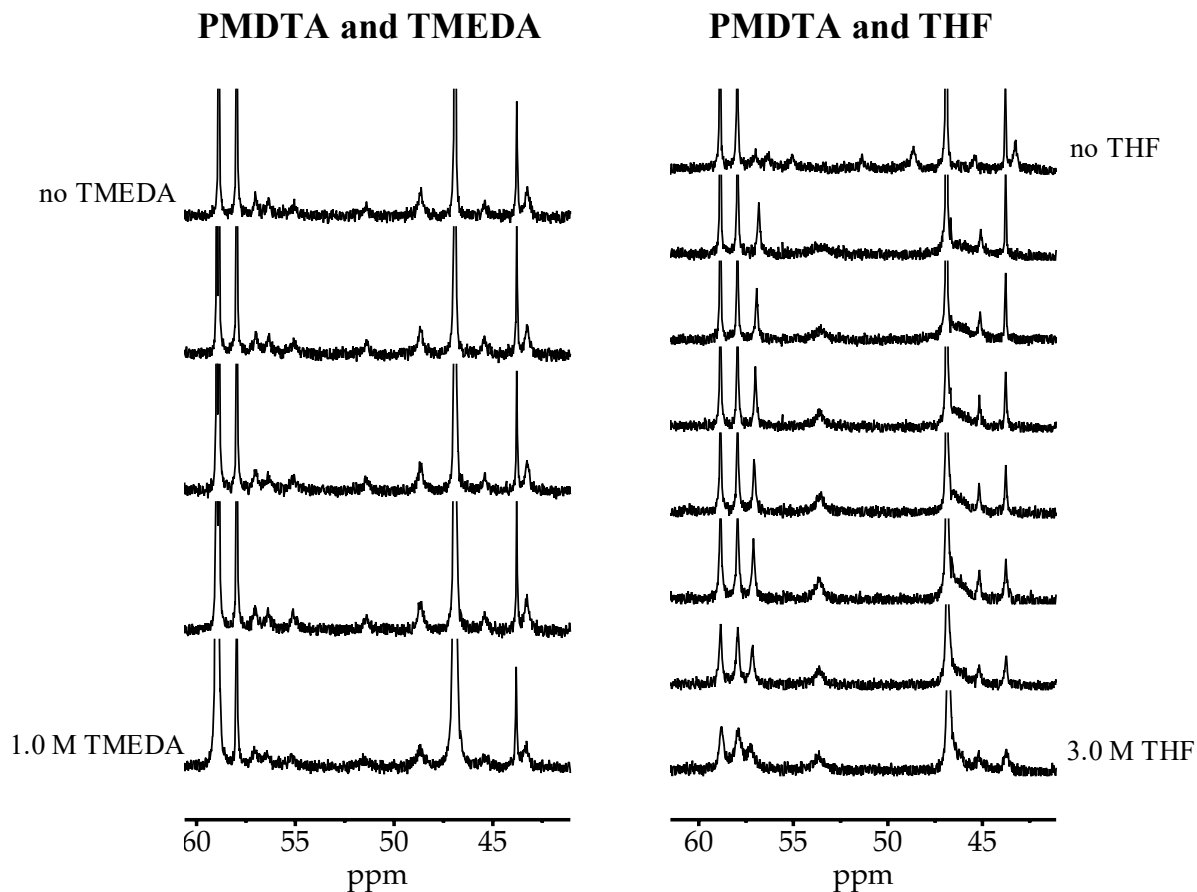

**Figure S75.**  $^{13}\text{C}$  NMR spectra showing free and bound PMDTA resonances as TMEDA and THF were titrated into solutions. Both titrations were run under the following starting conditions: 0.10 M NaHMDS in 2:1 pentane/toluene- $d_8$  and 2.0 equiv of PMDTA at  $-120\text{ }^\circ\text{C}$ . Bound PMDTA resonances are observed even at 1.0 M TMEDA concentrations whereas THF appears to catalyze exchange.

### PMDTA and 12-crown-4

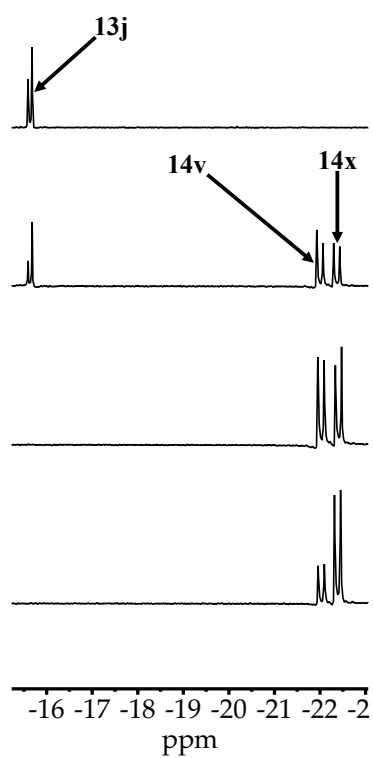

### PMDTA and HMPA

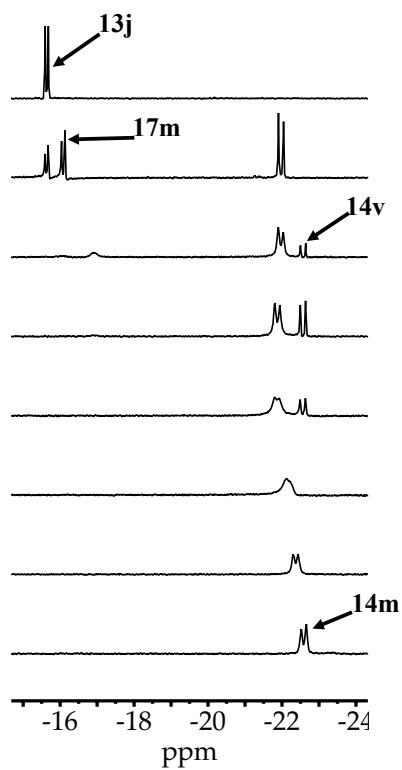

**Figure S76.**  $^{29}\text{Si}$  NMR spectra of 0.20 M  $^{15}\text{N}$ NaHMDS in MTBE at  $-110\text{ }^\circ\text{C}$  with incremental additions of 1:1 PMDTA/HMPA and 1:1 PMDTA/12-crown-4. The equiv of total added ligand from top to bottom are (A) PMDTA/12-crown-4: 0.0, 0.50, 1.0, and 1.5; and (B) PMDTA/HMPA: 0.0, 0.50, 1.0, 1.5, 2.0, 3.0, 4.0, 6.0

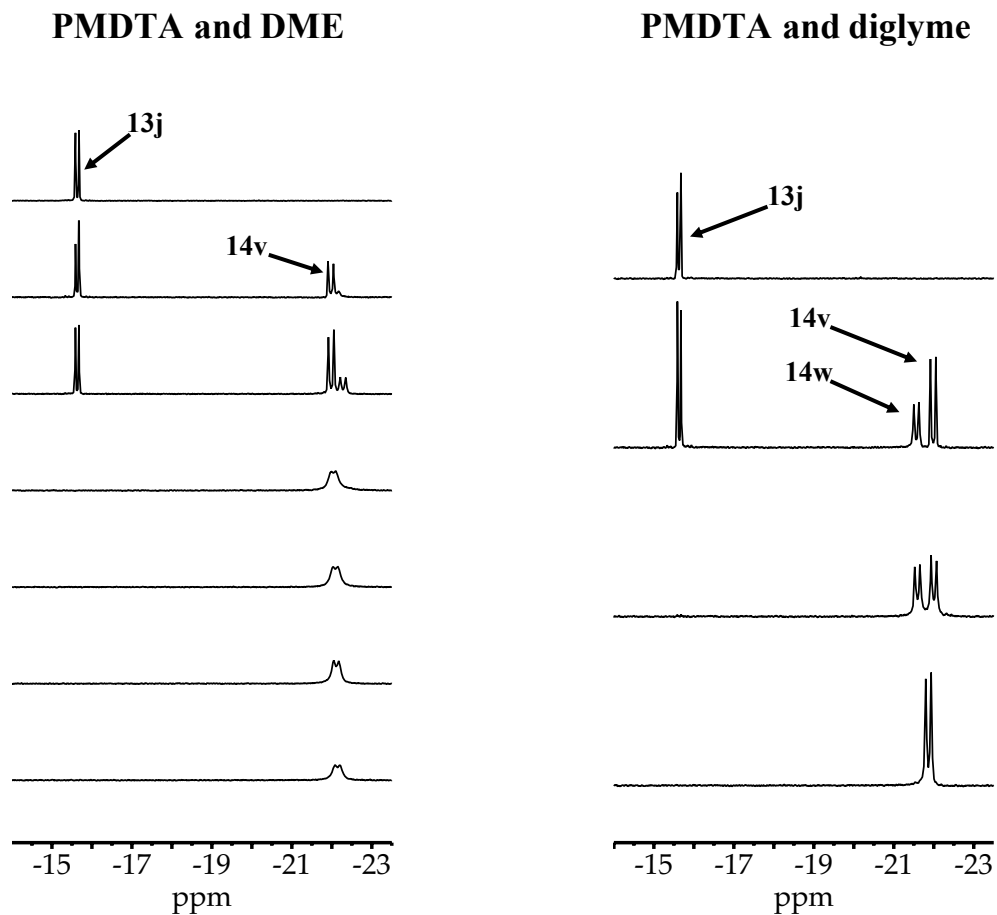

**Figure S77.**  $^{29}\text{Si}$  NMR spectra of 0.20 M  $^{15}\text{N}$ NaHMDS in MTBE at  $-110\text{ }^\circ\text{C}$  with incremental additions of 1:1 PMDTA/DME and 1:1 PMDTA/diglyme. The equiv of total added ligand are from top to bottom are (A) PMDTA/DME: 0.0, 0.50, 1.0, 2.0, 3.0, 4.0, and 6.0; and (B) PMDTA/diglyme: 0.0, 0.50, 1.0, and 2.0.



### Diglyme (entry x):

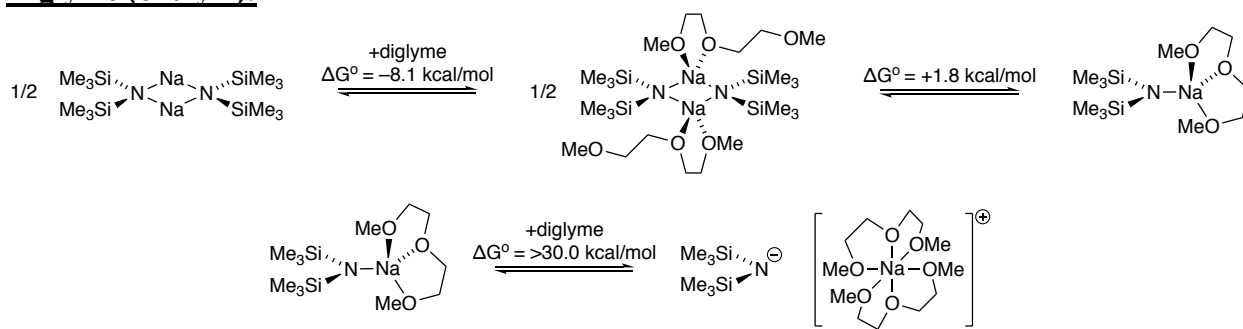

$^{29}\text{Si}\{^1\text{H}\}$  spectrum

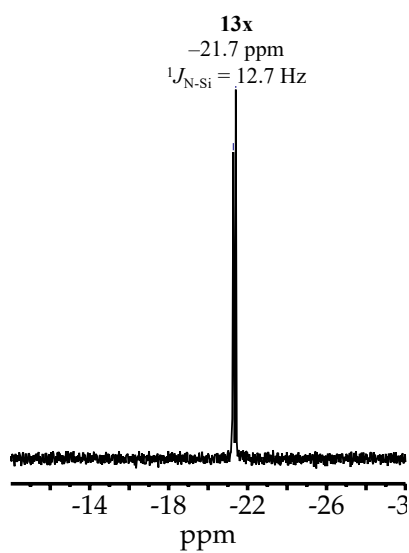

$^{13}\text{C}\{^1\text{H}\}$  spectrum

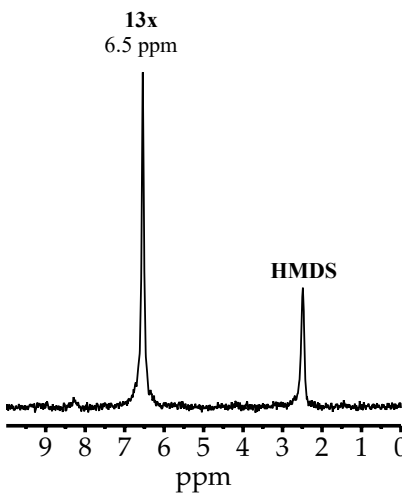

$^{15}\text{N}\{^1\text{H}\}$  spectrum

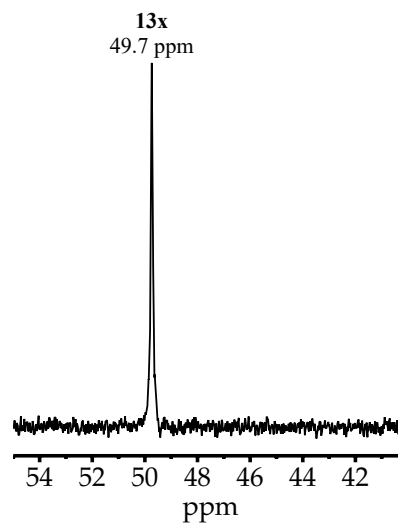

**Figure S78.** NMR spectra of 0.15 M  $^{15}\text{N}$ NaHMDS in 0.45 M diglyme with DMEA cosolvent at  $-120^\circ\text{C}$ .

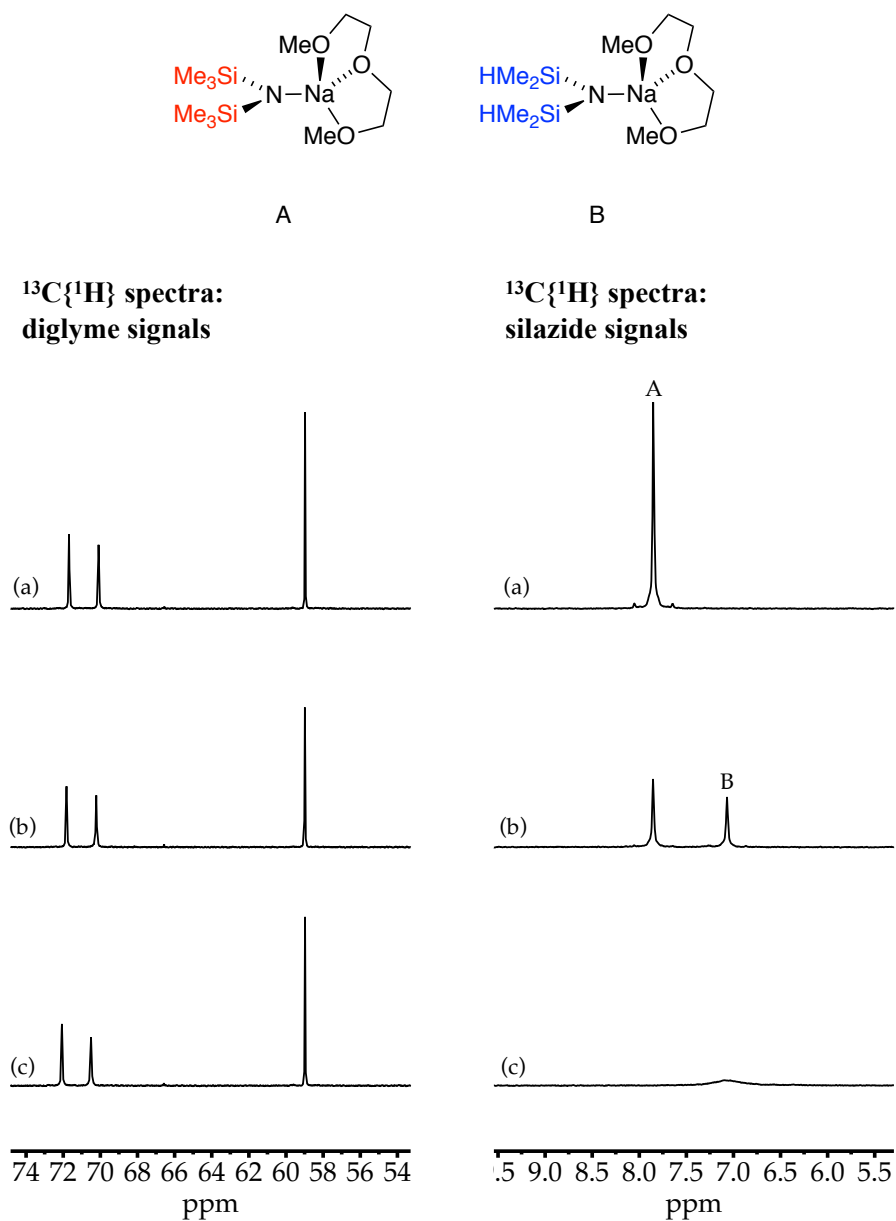

**Figure S79.**  $^{13}\text{C}$  NMR relative integrations of NaHMDS-derived homodimer ( $\text{A}_2$ ), NaTMDS-derived homodimer ( $\text{B}_2$ ), and heterodimer ( $\text{AB}$ ) versus the measured mole fraction of NaHMDS ( $X_{\text{NaHMDS}}$ ) at 0.20 total molarity in 0.40 M diglyme in toluene- $d_8$  cosolvent at  $-80^\circ\text{C}$ . The measured mole fractions,  $X_{\text{NaHMDS}}$ , in (a)–(c) are 1.00, 0.50, and 0.00, respectively.

### $^{29}\text{Si}\{^1\text{H}\}$ spectra

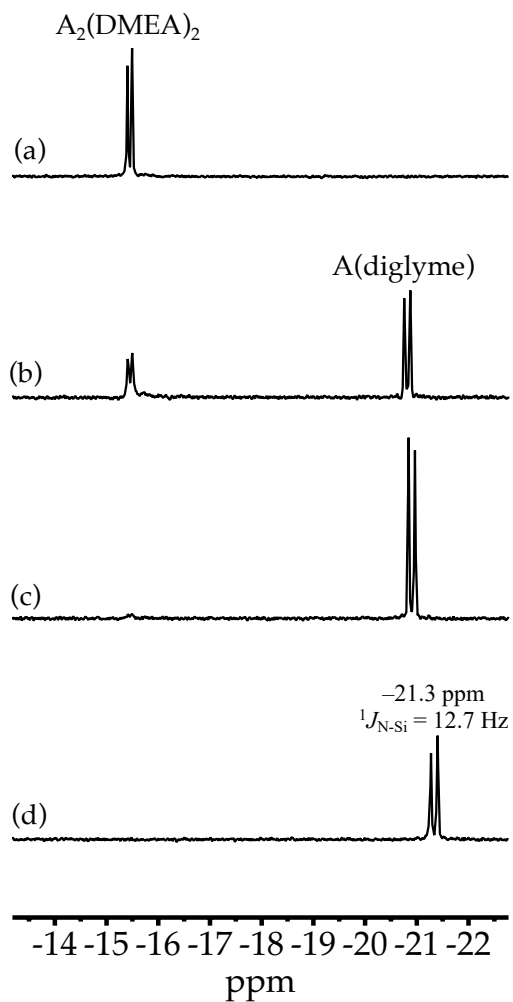

**Figure S80.**  $^{29}\text{Si}$  NMR spectra of 0.15 M  $[^{15}\text{N}]\text{NaHMDS}$  in DMEA cosolvent with varying amounts of diglyme added at  $-120^\circ\text{C}$ . The equivalents of diglyme for (a)–(d) are as follows: 0.0, 0.7, 1.0, and 3.0 equiv, respectively.

**12-crown-4 (entry v):**

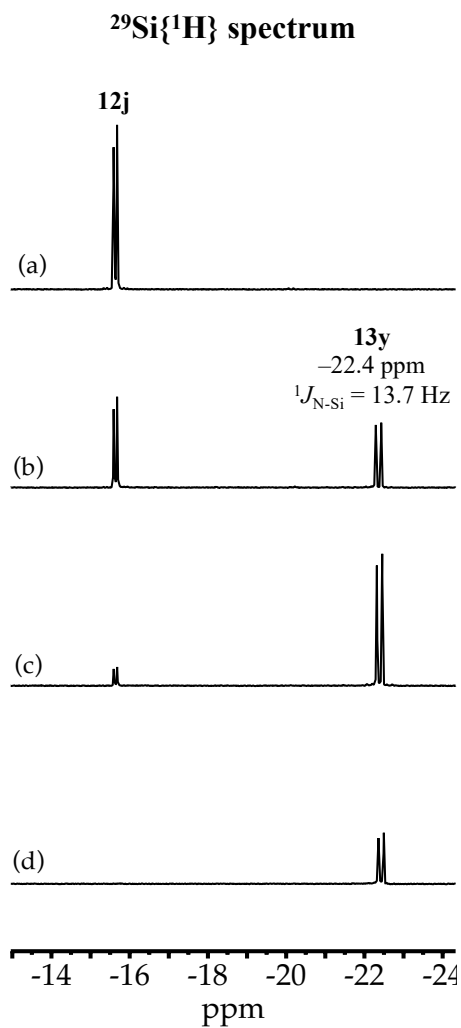

**Figure S81.**  $^{29}\text{Si}$  NMR spectra of 0.20 M  $[^{15}\text{N}]\text{NaHMDS}$  in MTBE cosolvent with varying amounts of 12-crown-4 added at  $-110\text{ }^\circ\text{C}$ . The equivalents of crown for (a)–(d) are as follows: 0.0, 0.3, 0.7, and 1.5 equiv, respectively.

$^{29}\text{Si}\{^1\text{H}\}$  spectrum

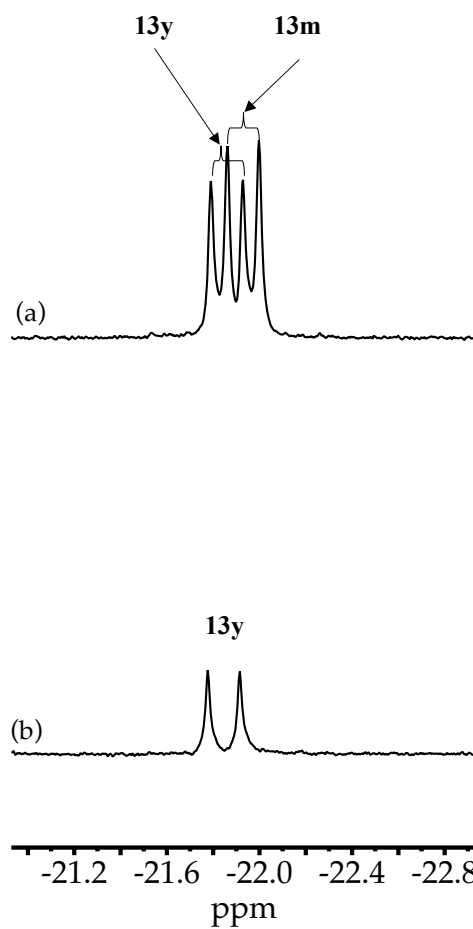

**Figure S82.**  $^{29}\text{Si}$  NMR spectra of 0.15 M  $[^{15}\text{N}]\text{NaHMDS}$  in THF cosolvent with varying amounts of 12-crown-4 added at  $-105\text{ }^\circ\text{C}$ . The equivalents of crown for (a) and (b) are as follows: 0.5 and 2.0 equiv, respectively.

### $^{29}\text{Si}\{^1\text{H}\}$ spectra

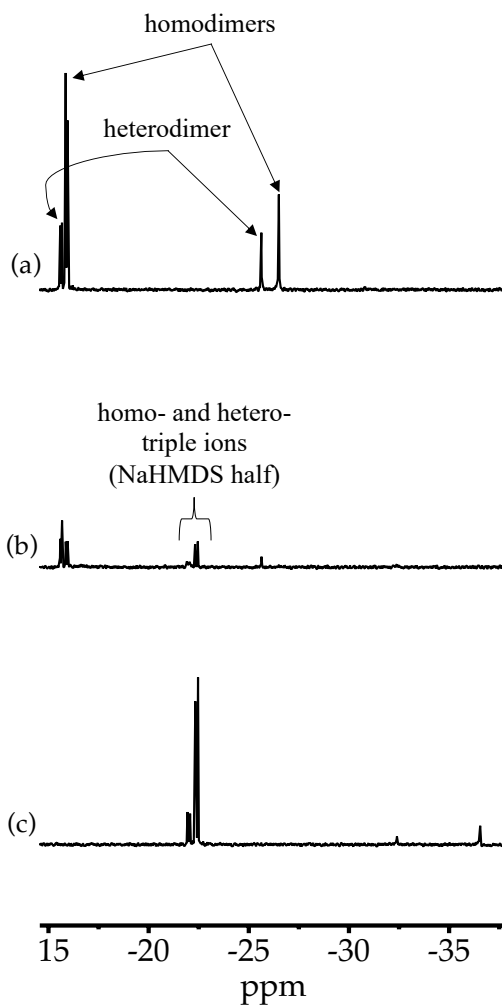

**Figure S83.** Titration of 12-crown-4 to a tube containing a 1:1 mix of NaHMDS and NaTMDS in MTBE cosolvent at  $-110\text{ }^{\circ}\text{C}$ . The equivalents of crown for (a)–(c) are as follows: 0.0, 0.4, and 1.5 equiv, respectively.

$^{29}\text{Si}\{^1\text{H}\}$  spectra

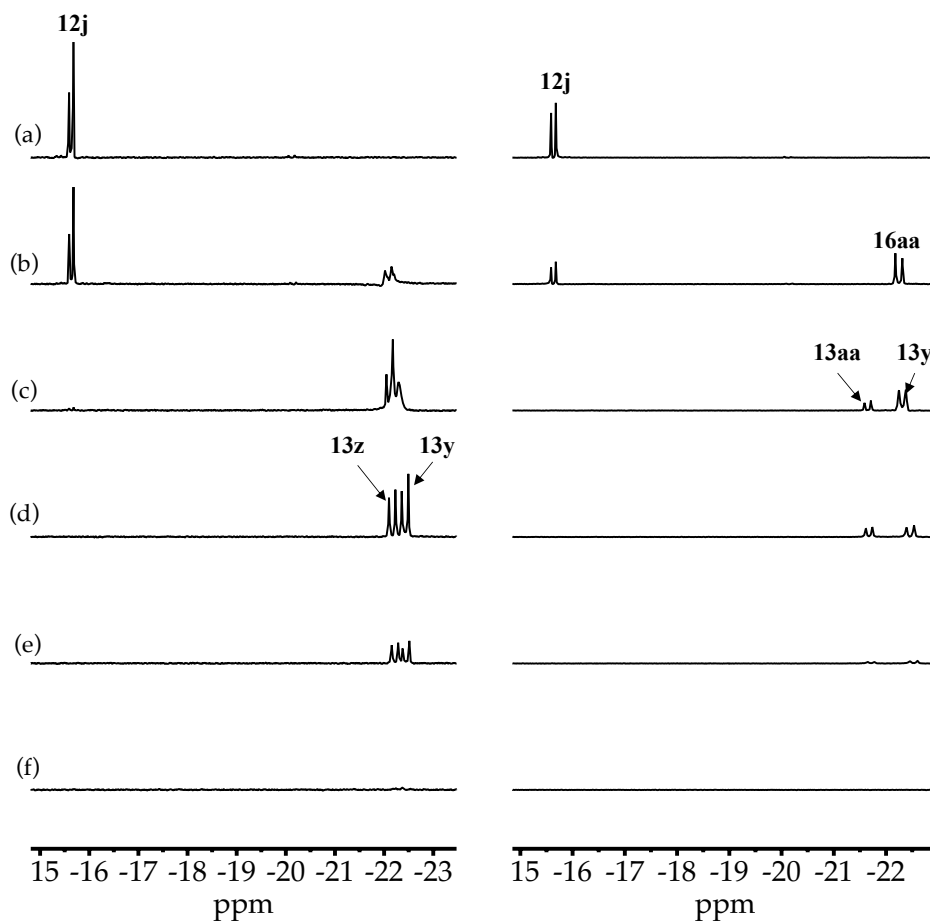

**Figure S84.**  $^{29}\text{Si}$  NMR spectra of 0.20 M  $[^{15}\text{N}]\text{NaHMDS}$  in MTBE at  $-110\text{ }^\circ\text{C}$  with incremental additions of 1:1 12-crown-4/15-crown-5 (left spectra) and 1:1 12-crown-4/18-crown-6 (right spectra). The equiv of total added ligand from (a)–(f) for each titration are as follows: 12-crown-4/15-crown-5: 0.0, 0.5, 1.0, 1.5, 2.0, and 2.5 equiv respectively. 12-crown-4/18-crown-6: 0.0, 0.5, 1.0, 1.5, 2.0, and 2.5 equiv respectively.

15-crown-5 (entry z):

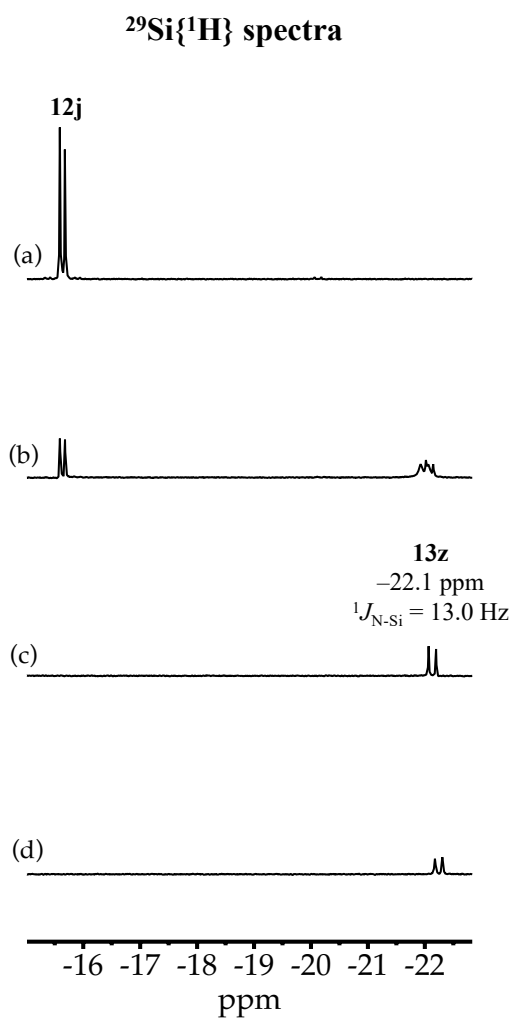

**Figure S85.**  $^{29}\text{Si}$  NMR spectra of 0.20 M  $[^{15}\text{N}]\text{NaHMDS}$  in MTBE cosolvent with varying amounts of 15-crown-5 added at  $-110\text{ }^\circ\text{C}$ . The equivalents of crown for (a)–(d) are as follows: 0.0, 0.3, 1.0, and 1.5 equiv, respectively.



### $^{13}\text{C}\{^1\text{H}\}$ spectra

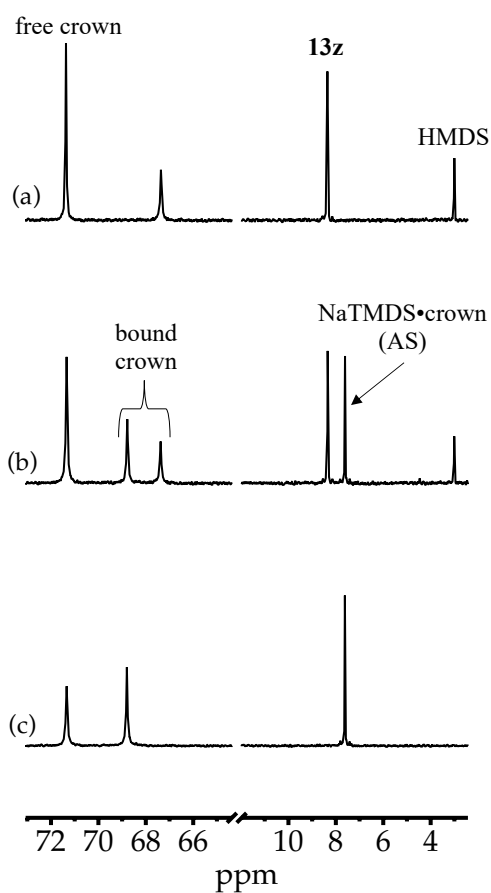

**Figure S86**  $^{13}\text{C}$  NMR spectra of with mixing NaHMDS and NaTMDS at 0.20 total molarity with 0.35 M 15-crown-5 in toluene- $d_8$  cosolvent at  $-80^\circ\text{C}$ . The measured mole fractions,  $X_{\text{NaHMDS}}$ , in (a)–(c) are 1.00, 0.50, and 0.00, respectively. Show are the crown carbon signals which appear to be in the slow exchange limit.

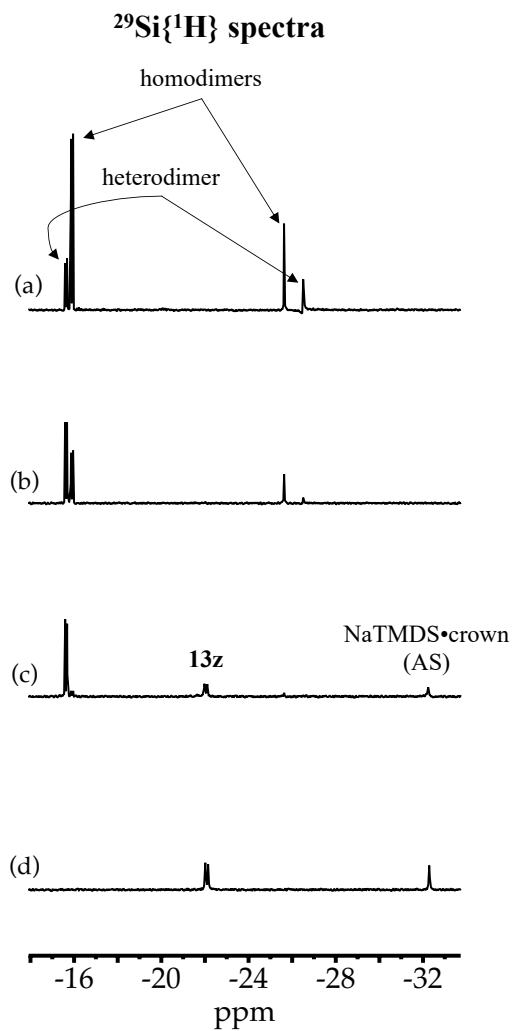

**Figure S87.** Titration of 15-crown-5 to a tube containing a 1:1 mix of NaHMDS and NaTMDS in MTBE cosolvent at  $-110\text{ }^{\circ}\text{C}$ . The equivalents of crown for (a)–(d) are as follows: 0.0, 0.3, 0.5 and 1.5 equiv, respectively.

$^{29}\text{Si}\{^1\text{H}\}$  spectra

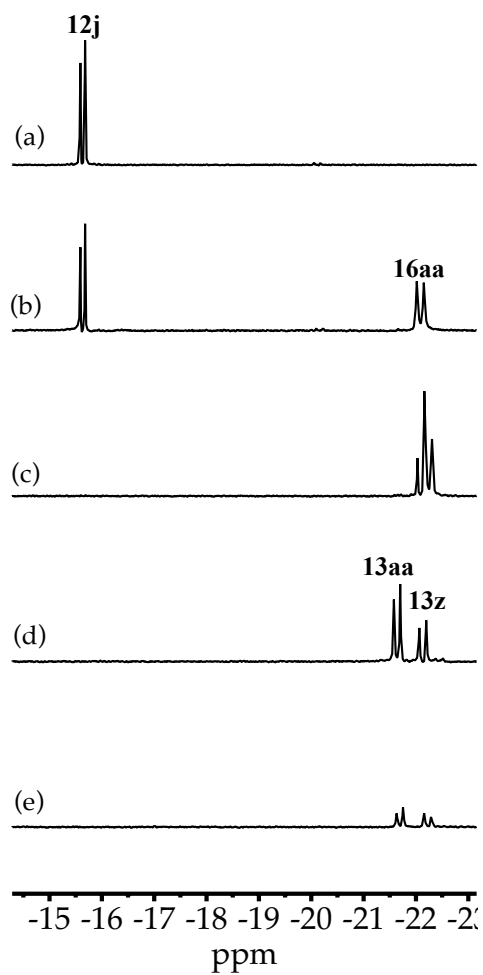

**Figure S88.**  $^{29}\text{Si}$  NMR spectra of 0.20 M  $[^{15}\text{N}]\text{NaHMDS}$  in MTBE at  $-110\text{ }^\circ\text{C}$  with incremental additions of 1:1 15-crown-5/18-crown-6. The equiv of total added ligand from (a)–(e) for each titration are as follows:  
15-crown-5/18-crown-6: 0.0, 0.5, 1.0, 1.5, and 2.0 equiv respectively.

**Table S2.** Crystal structure for NaHMDS•15-crown5.  
Owing to the low resolution of the crystal, only coordinates (xyz) are presented.

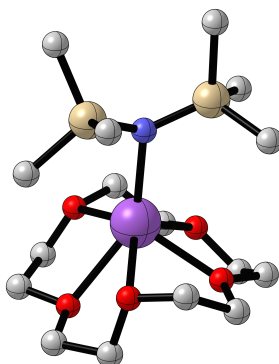

**13z**  
crystal  
structure

|    | X        | Y        | Z         |
|----|----------|----------|-----------|
| Si | 1.526694 | 8.150690 | 13.955027 |
| Si | 2.056675 | 5.715469 | 12.255062 |
| Na | 3.809574 | 5.810148 | 15.085720 |
| O  | 4.894962 | 7.493565 | 16.536383 |
| O  | 5.310636 | 3.855943 | 15.547027 |
| O  | 2.859955 | 5.941554 | 17.252881 |
| O  | 6.130063 | 6.141126 | 14.322110 |
| O  | 2.555439 | 3.704031 | 15.786514 |
| C  | 6.245870 | 7.668347 | 16.226228 |
| C  | 6.490829 | 7.519347 | 14.795195 |
| C  | 4.631154 | 2.608138 | 15.692289 |
| N  | 2.394793 | 6.800571 | 13.462312 |
| C  | 0.262917 | 7.807782 | 15.278095 |
| C  | 4.614322 | 7.402933 | 17.943860 |
| C  | 1.773234 | 5.088611 | 17.694558 |
| C  | 3.248065 | 4.281517 | 12.288433 |
| C  | 7.103296 | 5.196469 | 14.732378 |
| C  | 2.642086 | 9.537823 | 14.551782 |
| C  | 6.390006 | 3.801934 | 14.634228 |
| C  | 3.158789 | 7.058132 | 18.067530 |
| C  | 3.409069 | 2.830171 | 16.532457 |
| C  | 0.331114 | 4.945509 | 12.384620 |
| C  | 2.115940 | 6.441890 | 10.564911 |
| C  | 0.443759 | 8.923576 | 12.582884 |
| C  | 1.414068 | 4.190501 | 16.465715 |

18-crown-6 (entry aa):

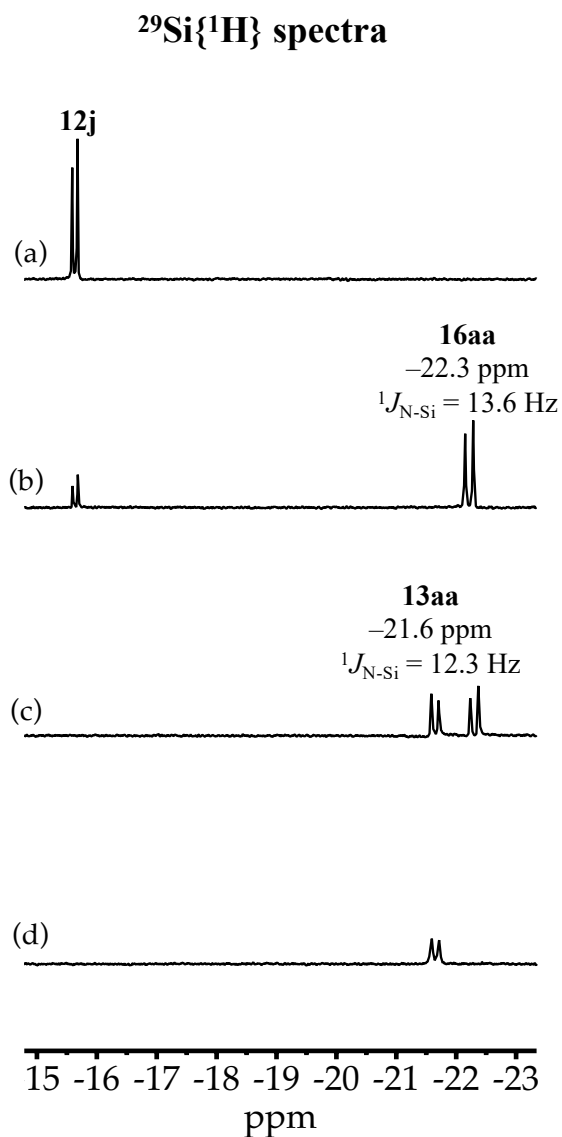

**Figure S89.**  $^{29}\text{Si}$  NMR spectra of 0.20 M  $[^{15}\text{N}]\text{NaHMDS}$  in MTBE cosolvent with varying amounts of 18-crown-6 added at  $-110^\circ\text{C}$ . The equivalents of crown for (a)–(d) are as follows: 0.0, 0.5, 1.0, and 1.5 equiv, respectively.

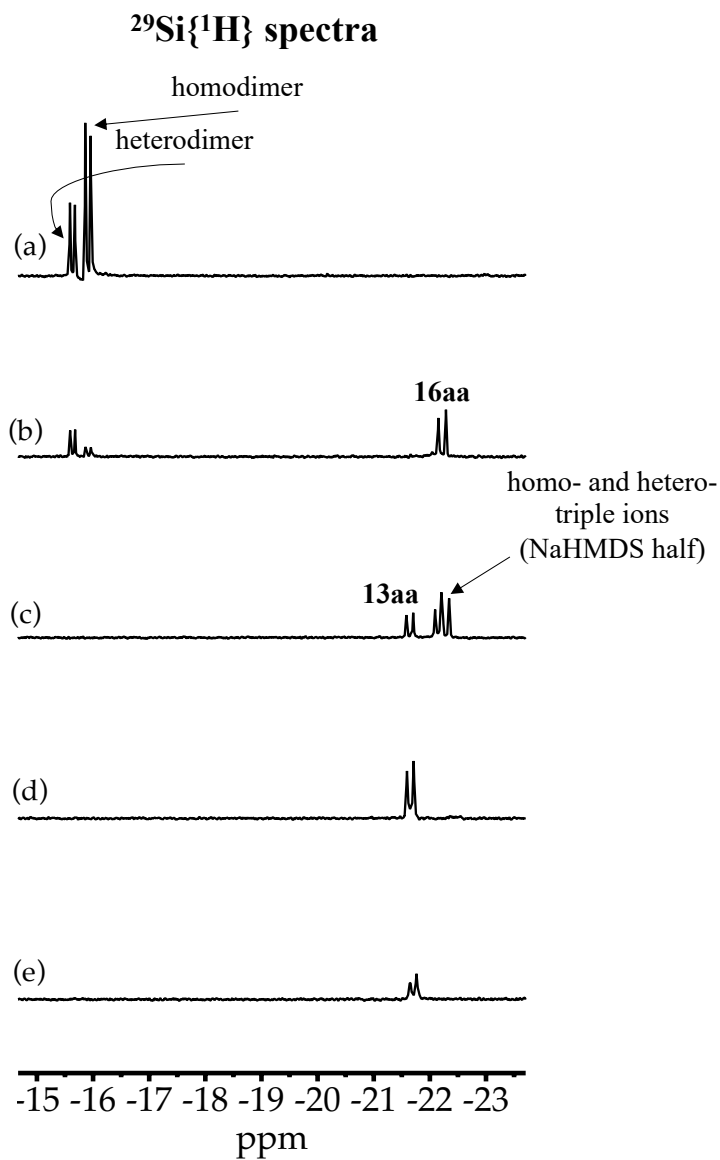

**Figure S90.** Titration of 18-crown-6 to a tube containing a 1:1 mix of NaHMDS and NaTMDS in MTBE cosolvent at  $-110\text{ }^{\circ}\text{C}$ . The equivalents of crown for (a)–(e) are as follows: 0.0, 0.5, 1.0, 1.5, and 2.0 equiv, respectively.

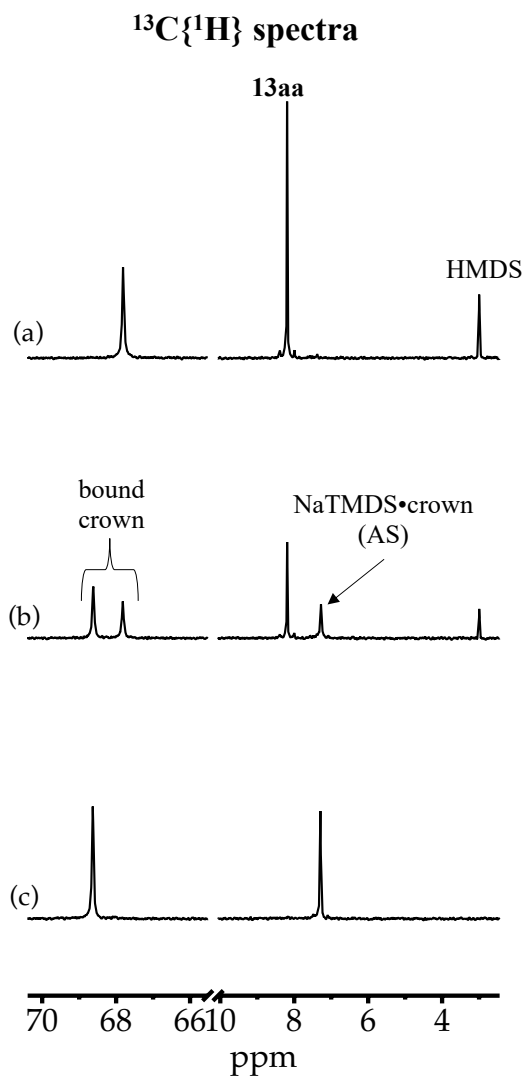

**Figure S91.**  $^{13}\text{C}$  NMR spectra of with mixing NaHMDS and NaTMDS at 0.20 total molarity with 0.40 M 18-crown-6 in toluene- $d_8$  cosolvent at  $-80\text{ }^\circ\text{C}$ . The measured mole fractions,  $X_{\text{NaHMDS}}$ , in (a)–(c) are 1.00, 0.50, and 0.00, respectively. Show are the crown carbon signals which appear to be in the slow exchange limit.

TDA-1 (entry bb):

$^{29}\text{Si}\{^1\text{H}\}$  spectra

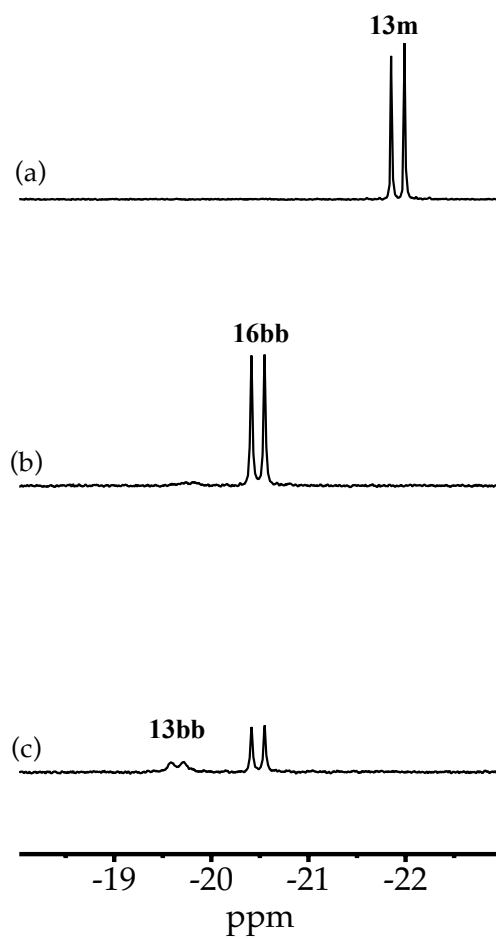

**Figure S92.**  $^{29}\text{Si}$  NMR spectra of 0.20 M  $^{15}\text{N}$ NaHMDS in THF cosolvent with varying amounts of TDA-1 added at  $-105\text{ }^\circ\text{C}$ . The equivalents of TDA-1 for (a)–(c) are as follows: 0.0, 0.5, and 1.5 equiv, respectively.



[2.2.2]cryptand (entry cc):

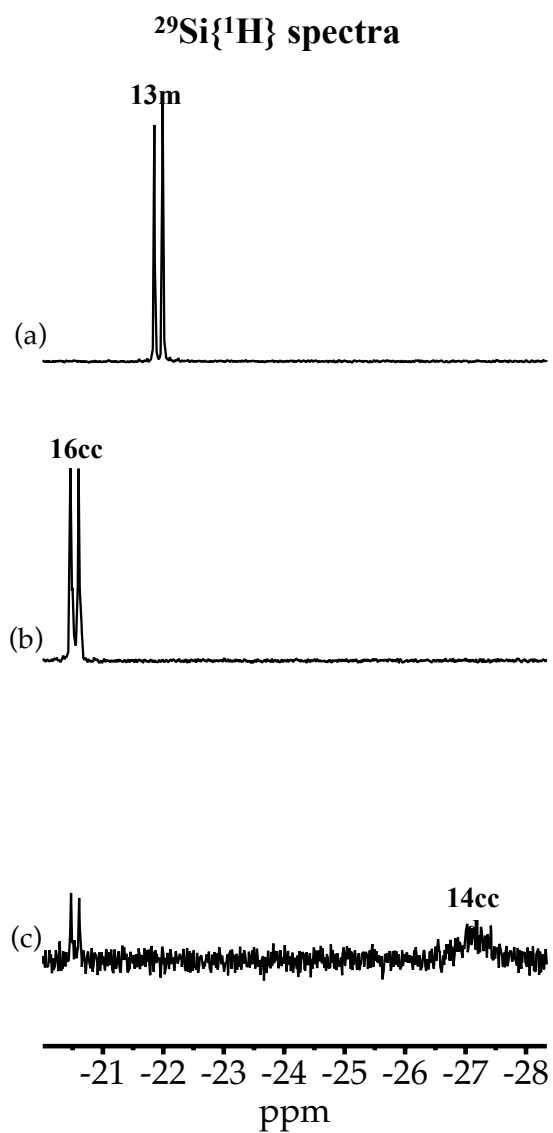

**Figure S93.**  $^{29}\text{Si}$  NMR spectra of 0.20 M  $[^{15}\text{N}]\text{NaHMDS}$  in THF cosolvent with varying amounts of [2.2.2]cryptand added at  $-105\text{ }^\circ\text{C}$ . The equivalents of cryptand for (a)–(c) are as follows: 0.0, 0.5, and 1.5 equiv, respectively.

**Table S3.** Crystal data and structure refinement for NaHMDS•cryptand complex.

|                                   |                                                                                  |                    |
|-----------------------------------|----------------------------------------------------------------------------------|--------------------|
| Identification code               | rrow4_abs7                                                                       |                    |
| Empirical formula                 | C <sub>24</sub> H <sub>54</sub> N <sub>3</sub> Na O <sub>6</sub> Si <sub>2</sub> |                    |
| Formula weight                    | 559.87                                                                           |                    |
| Temperature                       | 100.02(10) K                                                                     |                    |
| Wavelength                        | 1.54184 Å                                                                        |                    |
| Crystal system                    | Monoclinic                                                                       |                    |
| Space group                       | P 1 21/c 1                                                                       |                    |
| Unit cell dimensions              | a = 14.12790(10) Å                                                               | a = 90°.           |
|                                   | b = 19.22530(10) Å                                                               | b = 117.6180(10)°. |
|                                   | c = 13.27070(10) Å                                                               | g = 90°.           |
| Volume                            | 3193.79(5) Å <sup>3</sup>                                                        |                    |
| Z                                 | 4                                                                                |                    |
| Density (calculated)              | 1.164 Mg/m <sup>3</sup>                                                          |                    |
| Absorption coefficient            | 1.455 mm <sup>-1</sup>                                                           |                    |
| F(000)                            | 1224                                                                             |                    |
| Crystal size                      | 0.231 x 0.14 x 0.073 mm <sup>3</sup>                                             |                    |
| Theta range for data collection   | 3.531 to 77.972°.                                                                |                    |
| Index ranges                      | -17<=h<=17, -24<=k<=24, -16<=l<=16                                               |                    |
| Reflections collected             | 131803                                                                           |                    |
| Independent reflections           | 6804 [R(int) = 0.0465]                                                           |                    |
| Completeness to theta = 67.684°   | 99.9 %                                                                           |                    |
| Absorption correction             | Gaussian                                                                         |                    |
| Max. and min. transmission        | 1.000 and 0.530                                                                  |                    |
| Refinement method                 | Full-matrix least-squares on F <sup>2</sup>                                      |                    |
| Data / restraints / parameters    | 6804 / 1329 / 374                                                                |                    |
| Goodness-of-fit on F <sup>2</sup> | 1.083                                                                            |                    |
| Final R indices [I>2sigma(I)]     | R1 = 0.0775, wR2 = 0.2088                                                        |                    |
| R indices (all data)              | R1 = 0.0809, wR2 = 0.2118                                                        |                    |
| Extinction coefficient            | n/a                                                                              |                    |
| Largest diff. peak and hole       | 0.779 and -0.631 e.Å <sup>-3</sup>                                               |                    |

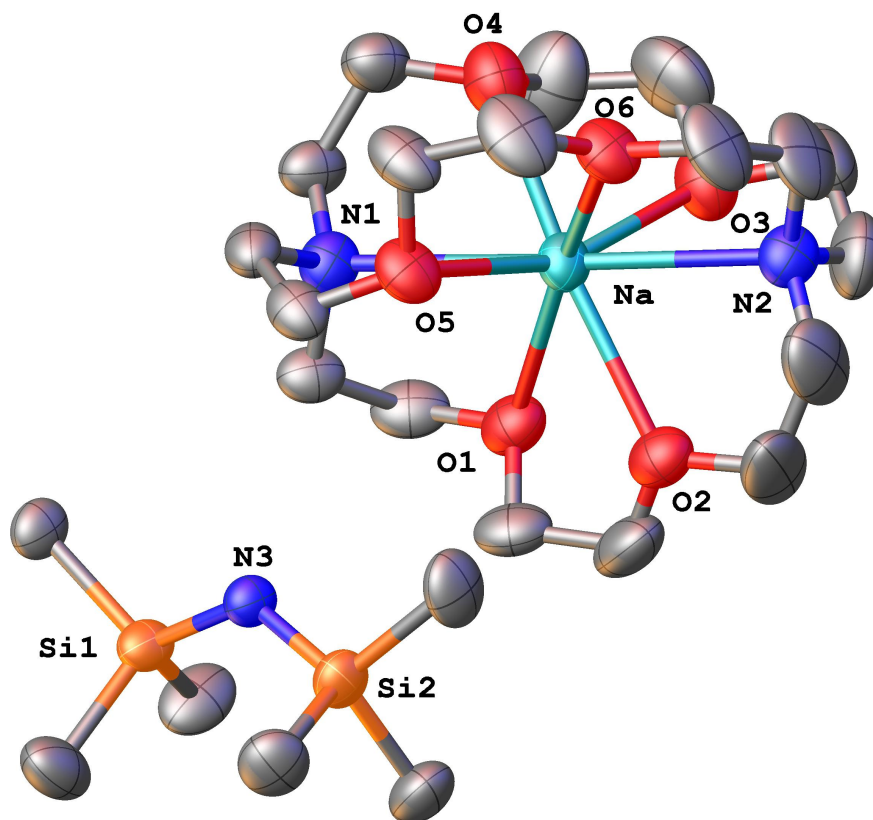

Atomic coordinates ( $\times 10^4$ ) and equivalent isotropic displacement parameters ( $\text{\AA}^2 \times 10^3$ ) for Rraw4.  $U(\text{eq})$  is defined as one third of the trace of the orthogonalized  $U^{ij}$  tensor.

|       | x       | y       | z       | $U(\text{eq})$ |
|-------|---------|---------|---------|----------------|
| Si(1) | 7796(1) | 5762(1) | 3660(1) | 44(1)          |
| Si(2) | 7016(1) | 6752(1) | 4848(1) | 47(1)          |
| N(3)  | 6945(2) | 6042(1) | 4109(2) | 40(1)          |
| C(19) | 7685(4) | 6238(2) | 2358(4) | 74(1)          |
| C(20) | 7600(3) | 4816(2) | 3231(3) | 50(1)          |
| C(21) | 9263(3) | 5840(2) | 4709(4) | 77(1)          |
| C(22) | 5777(3) | 6885(2) | 5024(3) | 69(1)          |
| C(23) | 7208(3) | 7592(2) | 4229(4) | 71(1)          |
| C(24) | 8147(3) | 6767(2) | 6358(3) | 66(1)          |
| Na    | 2568(1) | 6109(1) | 1667(1) | 46(1)          |
| O(1)  | 3834(2) | 6564(1) | 846(2)  | 58(1)          |
| O(4)  | 1600(2) | 5080(1) | 228(2)  | 70(1)          |
| O(5)  | 3760(2) | 5412(1) | 3443(2) | 57(1)          |

|        |          |          |          |        |
|--------|----------|----------|----------|--------|
| N(1)   | 3921(2)  | 5066(1)  | 1399(2)  | 52(1)  |
| C(1)   | 4745(2)  | 5443(2)  | 1242(2)  | 51(1)  |
| C(2)   | 4287(3)  | 6043(2)  | 435(3)   | 60(1)  |
| C(3)   | 4636(3)  | 6975(2)  | 1731(3)  | 64(1)  |
| C(4)   | 4090(4)  | 7556(2)  | 1979(4)  | 83(1)  |
| C(9)   | 391(4)   | 5892(3)  | -966(4)  | 98(1)  |
| C(10)  | 1162(5)  | 5355(3)  | -877(4)  | 109(2) |
| C(11)  | 2199(3)  | 4472(2)  | 345(3)   | 62(1)  |
| C(12)  | 3279(3)  | 4621(2)  | 427(3)   | 56(1)  |
| C(13)  | 4413(2)  | 4649(2)  | 2441(3)  | 50(1)  |
| C(14)  | 4675(2)  | 5076(2)  | 3478(2)  | 51(1)  |
| C(15)  | 3067(3)  | 4936(2)  | 3603(3)  | 65(1)  |
| C(16)  | 2274(3)  | 5343(3)  | 3799(3)  | 81(1)  |
| O(2)   | 3346(4)  | 7335(2)  | 2193(4)  | 58(1)  |
| O(3)   | 985(6)   | 6456(4)  | -120(5)  | 70(1)  |
| O(6)   | 1734(4)  | 5827(3)  | 2937(4)  | 57(1)  |
| N(2)   | 1209(4)  | 7092(3)  | 1702(5)  | 52(1)  |
| C(5)   | 2776(8)  | 7875(5)  | 2399(12) | 114(4) |
| C(6)   | 1843(8)  | 7631(6)  | 2465(9)  | 96(3)  |
| C(7)   | 673(8)   | 7412(5)  | 575(8)   | 84(2)  |
| C(8)   | 111(7)   | 6910(6)  | -338(11) | 87(3)  |
| C(17)  | 1098(7)  | 6296(6)  | 3185(7)  | 83(2)  |
| C(18)  | 525(7)   | 6738(6)  | 2096(9)  | 86(3)  |
| O(2')  | 3451(5)  | 7215(3)  | 2584(5)  | 58(1)  |
| O(3')  | 905(8)   | 6417(5)  | -346(6)  | 70(1)  |
| O(6')  | 1513(5)  | 5576(4)  | 2625(5)  | 57(1)  |
| N(2')  | 1347(5)  | 7038(3)  | 2159(6)  | 52(1)  |
| C(5')  | 3002(11) | 7740(9)  | 2997(13) | 113(5) |
| C(6')  | 2126(11) | 7462(8)  | 3077(12) | 99(4)  |
| C(7')  | 710(15)  | 7325(9)  | 1027(10) | 111(4) |
| C(8')  | 491(16)  | 7055(10) | -89(13)  | 121(6) |
| C(17') | 640(10)  | 5970(6)  | 2544(15) | 96(3)  |
| C(18') | 746(15)  | 6707(7)  | 2642(16) | 98(4)  |

---

### Derivation for coupling constant fitting function:

To simplify the presentation, we introduce the following shorthand: A = a NaHMDS subunit, S = solvent,  $[A]_T$  = total [NaHMDS],  $J_{\text{obsd}}$  = observed average coupling constant. As shown in eq 1 subscripts  $m$  corresponds to the number of solvent molecules bound in the dimer subunits whereas  $n$  corresponds to the additional solvent molecules to the monomer. With this simplified model only a single monomer solvation number is assumed to be present.

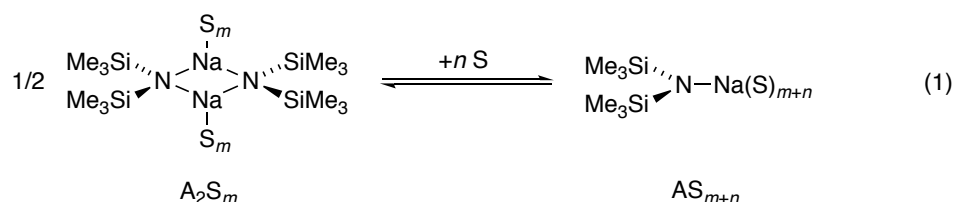

Given:

$$[A]_T = 2[A_2S_m] + [AS_{m+n}]$$

$$K_{\text{eq}} = \frac{[AS_{m+n}]}{[A_2S_m]^{1/2}[S]^n}$$

One can solve for  $[AS_{m+n}]$  as a function of  $[S]$  by applying the quadratic equation:

$$[AS_{m+n}] = 0.125 \left( 4[A]_T + K_{\text{eq}}^2[S]^{2n} - \sqrt{8[A]_T K_{\text{eq}}^2[S]^{2n} + K_{\text{eq}}^4[S]^{4n}} \right)$$

Using the equation relating the observed coupling constant to the average of the dimer and monomer coupling constants and the equation solved above for  $[A]_T$  one can solve for  $[AS_{m+n}]$ :

$$J_{\text{obsd}} = \frac{J_{A_2S_m}[A_2S_m] + J_{AS_{m+n}}[AS_{m+n}]}{[A_2S_m] + [AS]_{m+n}}$$

$$[AS_{m+n}] = \frac{[A]_T J_{\text{obsd}} - [A]_T J_{AS_{m+n}}}{J_{A_2S_m} - 2J_{AS_{m+n}} + J_{\text{obsd}}}$$

Setting each equation solved for in terms of  $[AS_{m+n}]$  equal to one another gives:

$$\frac{[A]_T J_{\text{obsd}} - [A]_T J_{AS_{m+n}}}{J_{A_2S_m} - 2J_{AS_{m+n}} + J_{\text{obsd}}} = 0.125 \left( 4[A]_T + K_{\text{eq}}^2 S^{2n} - \sqrt{8[A]_T K_{\text{eq}}^2 S^{2n} + K_{\text{eq}}^4 S^{4n}} \right)$$

Rearranging affords the equation used as the fitting function:

$$J_{\text{obsd}} = \frac{4[A]_T J_{A_2 S_m} + J_{A_2 S_m} K_{\text{eq}}^2 [S]^{2n} - 2J_{AS_{m+n}} K_{\text{eq}}^2 [S]^{2n} - J_{A_2 S_m} \sqrt{8[A]_T K_{\text{eq}}^2 [S]^{2n} + K_{\text{eq}}^4 [S]^{4n}} + 2J_{AS_{m+n}} \sqrt{8[A]_T K_{\text{eq}}^2 [S]^{2n} + K_{\text{eq}}^4 [S]^{4n}}}{4[A]_T - K_{\text{eq}}^2 [S]^{2n} + \sqrt{8[A]_T K_{\text{eq}}^2 [S]^{2n} + K_{\text{eq}}^4 [S]^{4n}}}$$

Below is the input file used for a non-linear least squares fit. A legend for the assigned variables  $a-d$  is also provided. The red highlighted terms in the equation below corresponds to the solvent order that must be adjusted manually.

$$\begin{aligned} f(x) &= J_{\text{obs}} \\ x &= [S] \\ a &= [A]_T \\ b &= J_{A_2 S_m} \\ c &= J_{AS_{m+n}} \\ d &= K_{\text{eq}} \end{aligned}$$

$$f(x) = (4*a*b + b*(d^2)*(x^{2n}) - 2*c*(d^2)*(x^{2n}) - b*\sqrt{8*a*(d^2)*(x^{2n}) + (d^4)*(x^{4n})} + 2*c*\sqrt{8*a*(d^2)*(x^{2n}) + (d^4)*(x^{4n})}) / (4*a - (d^2)*(x^{2n}) + \sqrt{8*a*(d^2)*(x^{2n}) + (d^4)*(x^{4n})})$$

## II. Computations

DFT calculations were performed with the Gaussian 09 program package. Geometry optimizations and single point energies were computed at the M06-2X/def2-SVP level of theory and M06-2X/def2-TZVP level of theory respectively. A pruned (99,590) integration grid was used for all computations as well. CYLview Visualization Software was used for all ball-and-stick structures. Energies are defined as follows:  $G$  is the sum of electronic and thermal free energies calculated at the M06-2X level of theory (Hartrees;  $T = 195$  K).  $G_{SP}$  is derived from a single point calculation corresponding to the DFT-optimized geometry with the larger basis set (def2-TZVP) and includes a thermal correction from the optimization. Hydrogens have been removed from ball-and-stick models to improve clarity.

**Table S4.** Geometric coordinates and single point energies for toluene.

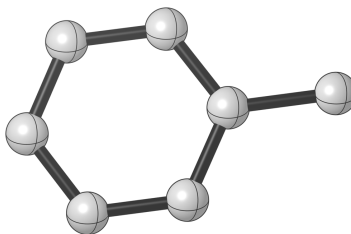

**G** = -271.12497 Hartrees

**G<sub>SP</sub>** = -271.4240179 Hartrees

| <b>Atom</b> | <b>X</b>   | <b>Y</b>   | <b>Z</b>   |
|-------------|------------|------------|------------|
| C           | 2.4199700  | 0.0001370  | 0.0094220  |
| C           | 0.9133230  | 0.0003670  | -0.0119040 |
| C           | 0.1953080  | -1.2010320 | -0.0090820 |
| C           | -1.1984960 | -1.2041830 | 0.0021120  |
| C           | -1.9016160 | -0.0002670 | 0.0084730  |
| C           | -1.1991070 | 1.2038450  | 0.0021090  |
| C           | 0.1948480  | 1.2013150  | -0.0090800 |
| H           | 0.7380160  | 2.1492950  | -0.0181460 |
| H           | -1.7393190 | 2.1521350  | 0.0021330  |
| H           | -2.9926080 | -0.0005390 | 0.0143450  |
| H           | -1.7383390 | -2.1526870 | 0.0021330  |
| H           | 0.7389200  | -2.1487830 | -0.0181610 |
| H           | 2.7962350  | -0.0161780 | 1.0442130  |
| H           | 2.8258640  | -0.8824340 | -0.5032250 |
| H           | 2.8258480  | 0.8981050  | -0.4755900 |



**Table S5.** Geometric coordinates and single point energies for benzene.

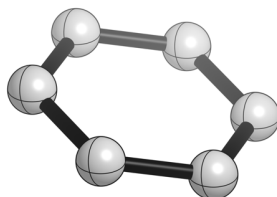

**G** = -231.883978 Hartrees

**G<sub>SP</sub>** = -232.1392645 Hartrees

| <b>Atom</b> | <b>X</b>   | <b>Y</b>   | <b>Z</b>   |
|-------------|------------|------------|------------|
| C           | 0.3386370  | -1.3529650 | 0.0000010  |
| C           | -1.0024190 | -0.9697130 | 0.0000240  |
| C           | -1.3410280 | 0.3832200  | -0.0000220 |
| C           | -0.3385860 | 1.3529780  | 0.0000030  |
| C           | 1.0023830  | 0.9697500  | 0.0000210  |
| C           | 1.3410130  | -0.3832700 | -0.0000200 |
| H           | 2.3904480  | -0.6831270 | -0.0000280 |
| H           | 1.7868900  | 1.7285520  | 0.0000130  |
| H           | -0.6035830 | 2.4117590  | -0.0000090 |
| H           | -2.3904260 | 0.6832060  | -0.0000270 |
| H           | -1.7868330 | -1.7286110 | 0.0000070  |
| H           | 0.6035010  | -2.4117780 | -0.0000060 |

**Table S6.** Geometric coordinates and single point energies for styrene.

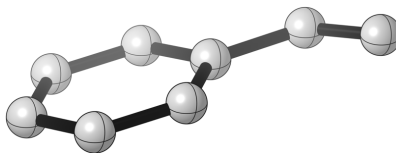

G = -309.15983 Hartrees

G<sub>SP</sub> = -309.5005756 Hartrees

| <b>Atom</b> | <b>X</b>   | <b>Y</b>   | <b>Z</b>   |
|-------------|------------|------------|------------|
| C           | -2.2590310 | 0.2665490  | 0.0000690  |
| C           | -1.7811140 | -1.0419690 | 0.0000780  |
| C           | -0.4085590 | -1.2823770 | -0.0000010 |
| C           | 0.5122130  | -0.2256220 | -0.0000790 |
| C           | 0.0154680  | 1.0873750  | -0.0001150 |
| C           | -1.3536640 | 1.3300170  | -0.0000310 |
| H           | -1.7200000 | 2.3578530  | -0.0000730 |
| H           | 0.7078000  | 1.9305760  | -0.0002330 |
| C           | 1.9550980  | -0.5353920 | -0.0001260 |
| H           | 2.1930840  | -1.6039590 | -0.0003950 |
| C           | 2.9640690  | 0.3396710  | 0.0001720  |
| H           | 3.9992410  | -0.0037250 | 0.0001010  |
| H           | 2.8015950  | 1.4195030  | 0.0005270  |
| H           | -0.0367420 | -2.3094970 | 0.0000120  |
| H           | -2.4792220 | -1.8804630 | 0.0001510  |
| H           | -3.3326370 | 0.4602020  | 0.0001250  |

**Table S7.** Geometric coordinates and single point energies for dimethylethylamine.

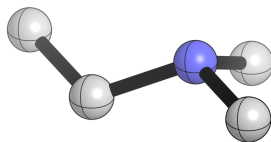

G = -213.373821 Hartrees

G<sub>SP</sub> = -213.6201404 Hartrees

| <b>Atom</b> | <b>X</b>   | <b>Y</b>   | <b>Z</b>   |
|-------------|------------|------------|------------|
| N           | 0.4572520  | -0.0032570 | -0.3159140 |
| C           | 0.6019050  | 1.3750890  | 0.0939050  |
| H           | 1.4864430  | 1.8140140  | -0.3891340 |
| H           | -0.2701570 | 1.9680140  | -0.2120010 |
| H           | 0.7248790  | 1.4840390  | 1.1955680  |
| C           | 1.6656120  | -0.7524300 | -0.0601070 |
| H           | 1.5599020  | -1.7797790 | -0.4373950 |
| H           | 2.5158730  | -0.2856190 | -0.5778930 |
| H           | 1.9161600  | -0.8104610 | 1.0230840  |
| C           | -0.6984810 | -0.6508520 | 0.2775880  |
| H           | -0.6810680 | -1.7051230 | -0.0402510 |
| H           | -0.6237550 | -0.6591910 | 1.3906980  |
| C           | -2.0240790 | -0.0323280 | -0.1423630 |
| H           | -2.8604340 | -0.6584920 | 0.1972410  |
| H           | -2.1698380 | 0.9693930  | 0.2850800  |
| H           | -2.0684990 | 0.0491280  | -1.2377430 |

**Table S8.** Geometric coordinates and single point energies for triethylamine.

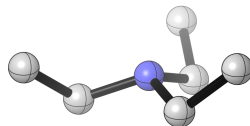

G = -291.846611 Hartrees

G<sub>SP</sub> = -292.1796866 Hartrees

| <b>Atom</b> | <b>X</b>   | <b>Y</b>   | <b>Z</b>   |
|-------------|------------|------------|------------|
| C           | -1.3428320 | 0.3788900  | 0.4447400  |
| N           | -0.0000020 | 0.0000430  | 0.0292400  |
| C           | 0.9994960  | 0.9736150  | 0.4445480  |
| H           | 0.5444500  | 1.9733820  | 0.3945760  |
| H           | 1.2837780  | 0.8208640  | 1.5097520  |
| C           | 2.2391170  | 0.9658090  | -0.4391700 |
| H           | 2.9555350  | 1.7322610  | -0.1111940 |
| H           | 2.7564110  | -0.0038350 | -0.4130810 |
| H           | 1.9555780  | 1.1682290  | -1.4810810 |
| C           | 0.3434160  | -1.3523100 | 0.4445960  |
| H           | 1.4367600  | -1.4581300 | 0.3945980  |
| H           | 0.0690520  | -1.5221110 | 1.5098200  |
| C           | -0.2830800 | -2.4219900 | -0.4391340 |
| H           | 0.0223940  | -3.4256490 | -0.1110670 |
| H           | -1.3814650 | -2.3851970 | -0.4132420 |
| H           | 0.0341600  | -2.2777240 | -1.4810030 |
| H           | -1.9811410 | -0.5150910 | 0.3952010  |
| H           | -1.3525000 | 0.7017650  | 1.5098560  |
| C           | -1.9561180 | 1.4559910  | -0.4392370 |
| H           | -2.9781020 | 1.6931880  | -0.1112760 |
| H           | -1.3751730 | 2.3889020  | -0.4135900 |
| H           | -1.9897120 | 1.1088200  | -1.4810100 |

**Table S9** Geometric coordinates and single point energies for pyrrolidine.

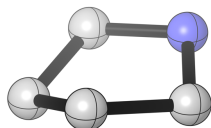

G = -212.198736 Hartrees

G<sub>SP</sub> = -212.4417845 Hartrees

| <b>Atom</b> | <b>X</b>   | <b>Y</b>   | <b>Z</b>   |
|-------------|------------|------------|------------|
| C           | -1.2104140 | -0.3884390 | -0.0305730 |
| H           | -1.7496930 | -0.4859390 | -0.9863720 |
| H           | -1.9229270 | -0.6568000 | 0.7652560  |
| C           | -0.6873410 | 1.0525510  | 0.1602300  |
| C           | 0.7772530  | 0.9603480  | -0.2733970 |
| C           | 1.1490190  | -0.4360340 | 0.2330290  |
| H           | 2.0354620  | -0.8647750 | -0.2548040 |
| H           | 1.3649270  | -0.3915720 | 1.3150740  |
| N           | -0.0305750 | -1.2668570 | -0.0081100 |
| H           | 0.0624900  | -1.7463610 | -0.8972140 |
| H           | 0.8537260  | 0.9920680  | -1.3726000 |
| H           | 1.4061330  | 1.7633410  | 0.1355160  |
| H           | -0.7388980 | 1.3350670  | 1.2227840  |
| H           | -1.2682960 | 1.7924150  | -0.4065990 |

**Table S10.** Geometric coordinates and single point energies for *N*-methylpyrrolidine.

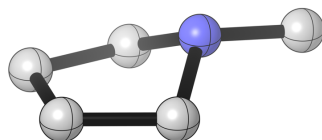

G = -251.434505 Hartrees

G<sub>SP</sub> = -251.7201927 Hartrees

| Atom | X          | Y          | Z          |
|------|------------|------------|------------|
| C    | 1.4901110  | 0.7748660  | -0.0609950 |
| C    | 1.4900710  | -0.7748880 | -0.0611920 |
| C    | 0.0193280  | -1.1475600 | 0.1659610  |
| H    | -0.2861150 | -2.0695200 | -0.3511270 |
| H    | -0.1768080 | -1.2931000 | 1.2537670  |
| N    | -0.7082770 | -0.0000270 | -0.3412410 |
| C    | 0.0193050  | 1.1475940  | 0.1658100  |
| H    | -0.2860370 | 2.0694460  | -0.3515290 |
| H    | -0.1770120 | 1.2933840  | 1.2535470  |
| C    | -2.1135040 | -0.0000060 | -0.0308810 |
| H    | -2.5965150 | 0.8891530  | -0.4613250 |
| H    | -2.5965170 | -0.8892230 | -0.4612040 |
| H    | -2.3076690 | 0.0000720  | 1.0655690  |
| H    | 2.1407370  | -1.2002850 | 0.7139060  |
| H    | 1.8355240  | -1.1586150 | -1.0300260 |
| H    | 2.1405140  | 1.1999960  | 0.7144700  |
| H    | 1.8359790  | 1.1588490  | -1.0295790 |

**Table S11.** Geometric coordinates and single point energies for pyridine.

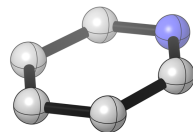

G = -247.915535 Hartrees

G<sub>SP</sub> = -248.192147 Hartrees

| <b>Atom</b> | <b>X</b>   | <b>Y</b>   | <b>Z</b>   |
|-------------|------------|------------|------------|
| C           | 1.1393060  | -0.7235290 | 0.0000880  |
| N           | -0.0000890 | -1.4116930 | 0.0000850  |
| C           | -1.1394220 | -0.7233660 | -0.0003330 |
| C           | -1.1967860 | 0.6710370  | 0.0000760  |
| C           | 0.0001040  | 1.3828730  | 0.0000030  |
| C           | 1.1968750  | 0.6708920  | -0.0000960 |
| H           | 2.1606160  | 1.1811570  | -0.0000870 |
| H           | 0.0001490  | 2.4743850  | 0.0000870  |
| H           | -2.1604290 | 1.1814880  | 0.0004000  |
| H           | -2.0628690 | -1.3111810 | 0.0004310  |
| H           | 2.0626940  | -1.3114430 | 0.0001460  |

**Table S12.** Geometric coordinates and single point energies for diethylether.

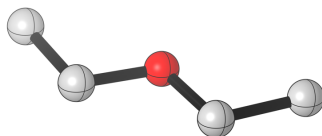

G = -233.241254 Hartrees

G<sub>SP</sub> = -233.5145333 Hartrees

| <b>Atom</b> | <b>X</b>   | <b>Y</b>   | <b>Z</b>   |
|-------------|------------|------------|------------|
| C           | 2.3647570  | -0.4147040 | -0.0000180 |
| H           | 2.3411230  | -1.0583010 | -0.8897860 |
| H           | 3.3042780  | 0.1541970  | 0.0000890  |
| H           | 2.3410760  | -1.0585850 | 0.8895410  |
| C           | 1.1716650  | 0.5163730  | 0.0000840  |
| H           | 1.1949610  | 1.1784720  | -0.8889100 |
| H           | 1.1949700  | 1.1780420  | 0.8893920  |
| O           | 0.0000080  | -0.2509080 | -0.0001010 |
| C           | -1.1717300 | 0.5164040  | -0.0000290 |
| H           | -1.1949930 | 1.1784530  | 0.8890060  |
| H           | -1.1955140 | 1.1782300  | -0.8892430 |
| C           | -2.3646970 | -0.4147780 | 0.0001130  |
| H           | -3.3042740 | 0.1539820  | -0.0001850 |
| H           | -2.3405190 | -1.0583710 | -0.8896790 |
| H           | -2.3411470 | -1.0586310 | 0.8896780  |



**Table S13.** Geometric coordinates and single point energies for methyl *t*-butylether.

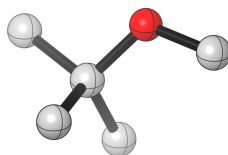

G = -272.479744 Hartrees

G<sub>SP</sub> = -272.7967012 Hartrees

| Atom | X          | Y          | Z          |
|------|------------|------------|------------|
| C    | 2.0151930  | -0.0000340 | -0.1524300 |
| H    | 2.1680520  | 0.8953560  | 0.4757110  |
| H    | 2.1676800  | -0.8949840 | 0.4764320  |
| O    | 0.7780070  | -0.0000200 | -0.8005840 |
| C    | -0.3938030 | 0.0000030  | 0.0075160  |
| C    | -1.5345800 | 0.0008250  | -1.0039380 |
| H    | -2.5104760 | 0.0007890  | -0.4988920 |
| H    | -1.4610540 | 0.8911200  | -1.6436950 |
| H    | -1.4614830 | -0.8888250 | -1.6446410 |
| C    | -0.4602520 | 1.2589600  | 0.8759730  |
| H    | 0.3119580  | 1.2598530  | 1.6586670  |
| H    | -0.3261930 | 2.1527210  | 0.2493820  |
| H    | -1.4374530 | 1.3240370  | 1.3750840  |
| C    | -0.4610360 | -1.2597340 | 0.8747900  |
| H    | -1.4381980 | -1.3245860 | 1.3740070  |
| H    | -0.3277170 | -2.1529850 | 0.2473180  |
| H    | 0.3112990  | -1.2619400 | 1.6573560  |
| H    | 2.7863910  | -0.0005120 | -0.9335200 |

**Table S14.** Geometric coordinates and single point energies for methyl 1,4-dioxane.

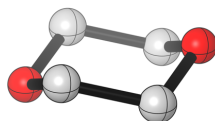

G = -307.183426 Hartrees

G<sub>SP</sub> = -307.5433292 Hartrees

| <b>Atom</b> | <b>X</b>   | <b>Y</b>   | <b>Z</b>   |
|-------------|------------|------------|------------|
| C           | -1.1608310 | 0.7357100  | -0.1911120 |
| C           | -1.1606400 | -0.7359220 | 0.1911820  |
| H           | -1.2091790 | -0.8237820 | 1.2943440  |
| H           | -2.0261940 | -1.2563710 | -0.2412660 |
| O           | 0.0001070  | -1.3682410 | -0.2936670 |
| C           | 1.1607560  | -0.7357490 | 0.1911900  |
| C           | 1.1607130  | 0.7358800  | -0.1911150 |
| H           | 2.0262260  | 1.2562490  | 0.2415040  |
| H           | 1.2094990  | 0.8237400  | -1.2942700 |
| O           | -0.0001030 | 1.3683450  | 0.2934790  |
| H           | 1.2092960  | -0.8236230 | 1.2943500  |
| H           | 2.0263760  | -1.2560740 | -0.2412700 |
| H           | -1.2096230 | 0.8235700  | -1.2942630 |
| H           | -2.0264220 | 1.2559460  | 0.2415130  |

**Table S15.** Geometric coordinates and single point energies for THF.

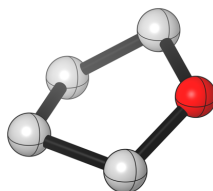

**G** = -232.060313 Hartrees

**G<sub>SP</sub>** = -232.329161 Hartrees

| Atom | X          | Y          | Z          | Atom | X | Y | Z |
|------|------------|------------|------------|------|---|---|---|
| C    | -1.1561140 | -0.4302150 | -0.1364250 |      |   |   |   |
| H    | -1.5191120 | -0.4680640 | -1.1798190 |      |   |   |   |
| H    | -1.9521560 | -0.8248280 | 0.5124330  |      |   |   |   |
| C    | -0.7265970 | 0.9879550  | 0.2364880  |      |   |   |   |
| H    | -0.7694920 | 1.1264360  | 1.3276930  |      |   |   |   |
| H    | -1.3464000 | 1.7629510  | -0.2329060 |      |   |   |   |
| C    | 0.7269230  | 0.9876820  | -0.2366390 |      |   |   |   |
| H    | 0.7698960  | 1.1257440  | -1.3278950 |      |   |   |   |
| H    | 1.3469340  | 1.7626540  | 0.2325220  |      |   |   |   |
| C    | 1.1559260  | -0.4304830 | 0.1367540  |      |   |   |   |
| H    | 1.9523400  | -0.8254160 | -0.5114370 |      |   |   |   |
| H    | 1.5181460  | -0.4681940 | 1.1804400  |      |   |   |   |
| O    | -0.0001230 | -1.2351150 | -0.0002630 |      |   |   |   |

**Table S16.** Geometric coordinates and single point energies for HMPA.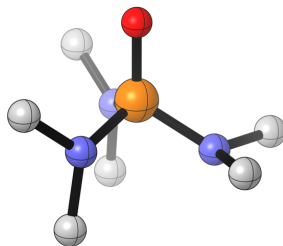

G = -819.403088 Hartrees

G<sub>SP</sub> = -820.1003633 Hartrees

| Atom | X          | Y          | Z          | Atom | X          | Y          | Z          |
|------|------------|------------|------------|------|------------|------------|------------|
| P    | -0.0001830 | 0.0482870  | 0.4993850  | H    | 1.2531460  | -2.8277850 | 1.0650930  |
| O    | -0.0009080 | 0.3119180  | 1.9630360  | C    | -1.2076620 | -2.3307060 | 0.0791780  |
| N    | -1.3995700 | 0.6572820  | -0.2069790 | H    | -2.0942820 | -1.6942340 | -0.0217860 |
| C    | -1.6815450 | 0.5466420  | -1.6208580 | H    | -1.2389230 | -3.1075940 | -0.7012690 |
| H    | -1.1627870 | -0.3224270 | -2.0459800 | H    | -1.2491530 | -2.8299320 | 1.0638460  |
| H    | -2.7643060 | 0.4035290  | -1.7768150 | N    | 0.0014620  | -1.5368390 | -0.0710920 |
| H    | -1.3794360 | 1.4492790  | -2.1845060 | C    | 1.2117490  | -2.3286680 | 0.0803610  |
| C    | -2.1513630 | 1.6808570  | 0.4933420  | H    | 1.2450520  | -3.1055370 | -0.7000210 |
| H    | -1.9625840 | 2.6879400  | 0.0777020  | H    | 2.0974290  | -1.6907510 | -0.0197420 |
| H    | -3.2322010 | 1.4779590  | 0.4104680  |      |            |            |            |
| H    | -1.8677450 | 1.6727490  | 1.5517080  |      |            |            |            |
| N    | 1.3985320  | 0.6597380  | -0.2061980 |      |            |            |            |
| C    | 2.1469030  | 1.6860220  | 0.4938700  |      |            |            |            |
| H    | 1.9561870  | 2.6921180  | 0.0767270  |      |            |            |            |
| H    | 1.8619770  | 1.6784870  | 1.5518890  |      |            |            |            |
| H    | 3.2283400  | 1.4856770  | 0.4126500  |      |            |            |            |
| C    | 1.6826780  | 0.5483040  | -1.6195820 |      |            |            |            |
| H    | 1.3791630  | 1.4496340  | -2.1845810 |      |            |            |            |
| H    | 2.7660040  | 0.4076820  | -1.7738750 |      |            |            |            |
| H    | 1.1666020  | -0.3224140 | -2.0445660 |      |            |            |            |

**Table S17.** Geometric coordinates and single point energies for DMPU.

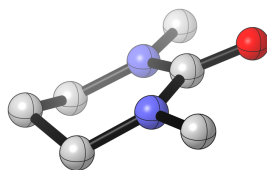

G = -419.945815 Hartrees

G<sub>SP</sub> = -420.4209791 Hartrees

| Atom | X          | Y          | Z          | Atom | X | Y | Z |
|------|------------|------------|------------|------|---|---|---|
| C    | 0.0000560  | 1.9923990  | 0.3658860  |      |   |   |   |
| C    | 1.2338520  | 1.3144390  | -0.1969130 |      |   |   |   |
| H    | 1.3336000  | 1.5383760  | -1.2778980 |      |   |   |   |
| H    | 2.1415790  | 1.7025400  | 0.2913850  |      |   |   |   |
| N    | 1.1759320  | -0.1132290 | 0.0327330  |      |   |   |   |
| C    | -0.0000280 | -0.8406920 | 0.0624080  |      |   |   |   |
| O    | -0.0000400 | -2.0564720 | 0.1348890  |      |   |   |   |
| N    | -1.1759610 | -0.1131790 | 0.0328340  |      |   |   |   |
| C    | -1.2337830 | 1.3144960  | -0.1968940 |      |   |   |   |
| H    | -1.3334820 | 1.5383930  | -1.2778900 |      |   |   |   |
| H    | -2.1414920 | 1.7026880  | 0.2913590  |      |   |   |   |
| C    | -2.4261000 | -0.8309680 | -0.0667020 |      |   |   |   |
| H    | -2.8769650 | -0.7121270 | -1.0677000 |      |   |   |   |
| H    | -2.2368910 | -1.8929250 | 0.1143310  |      |   |   |   |
| H    | -3.1426690 | -0.4537730 | 0.6799980  |      |   |   |   |
| C    | 2.4260570  | -0.8310520 | -0.0666670 |      |   |   |   |
| H    | 2.2367500  | -1.8930320 | 0.1141360  |      |   |   |   |
| H    | 2.8771170  | -0.7120280 | -1.0675550 |      |   |   |   |
| H    | 3.1425130  | -0.4540420 | 0.6802390  |      |   |   |   |
| H    | 0.0000490  | 1.8994910  | 1.4624190  |      |   |   |   |
| H    | 0.0000980  | 3.0613380  | 0.1123860  |      |   |   |   |

**Table S18** Geometric coordinates and single point energies for DMF.

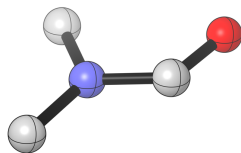

G = -248.116542 Hartrees

G<sub>SP</sub> = -248.4052246 Hartrees

| <b>Atom</b> | <b>X</b>   | <b>Y</b>   | <b>Z</b>   | <b>Atom</b> | <b>X</b> | <b>Y</b> | <b>Z</b> |
|-------------|------------|------------|------------|-------------|----------|----------|----------|
| C           | -1.6436700 | -0.6743900 | 0.0000520  |             |          |          |          |
| N           | -0.3639330 | 0.0073100  | -0.0000990 |             |          |          |          |
| C           | 0.7924140  | -0.7023160 | -0.0000120 |             |          |          |          |
| O           | 1.8955630  | -0.2092570 | 0.0000470  |             |          |          |          |
| H           | 0.6210950  | -1.8053300 | -0.0001360 |             |          |          |          |
| C           | -0.2488520 | 1.4540610  | -0.0000030 |             |          |          |          |
| H           | 0.3010290  | 1.8021710  | 0.8870370  |             |          |          |          |
| H           | 0.3053980  | 1.8016000  | -0.8845050 |             |          |          |          |
| H           | -1.2503850 | 1.8986610  | -0.0025750 |             |          |          |          |
| H           | -1.7735890 | -1.3050040 | 0.8933550  |             |          |          |          |
| H           | -2.4461590 | 0.0717520  | 0.0000920  |             |          |          |          |
| H           | -1.7737210 | -1.3050980 | -0.8931670 |             |          |          |          |

**Table S19.** Geometric coordinates and single point energies for DMSO.

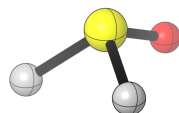

G = -552.775442 Hartrees

G<sub>SP</sub> = -553.126551 Hartrees

| Atom | X          | Y          | Z          | Atom | X | Y | Z |
|------|------------|------------|------------|------|---|---|---|
| C    | 1.3548720  | -0.7986380 | 0.1864640  |      |   |   |   |
| S    | -0.0000010 | 0.2297450  | -0.4529670 |      |   |   |   |
| O    | -0.0000420 | 1.4684330  | 0.3923000  |      |   |   |   |
| C    | -1.3548360 | -0.7986990 | 0.1864590  |      |   |   |   |
| H    | -2.2813170 | -0.2614300 | -0.0483980 |      |   |   |   |
| H    | -1.3550120 | -1.7870120 | -0.2912290 |      |   |   |   |
| H    | -1.2347960 | -0.8713350 | 1.2753970  |      |   |   |   |
| H    | 1.3551540  | -1.7869040 | -0.2913220 |      |   |   |   |
| H    | 2.2813230  | -0.2612730 | -0.0482960 |      |   |   |   |
| H    | 1.2347870  | -0.8713990 | 1.2753890  |      |   |   |   |

**Table S20.** Geometric coordinates and single point energies for *N,N,N',N'*-tetramethylethylenediamine (TMEDA).

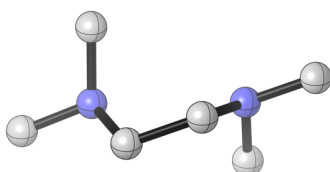

G = -347.098997 Hartrees

G<sub>SP</sub> = -347.4956942 Hartrees

| Atom | X          | Y          | Z          | Atom | X          | Y          | Z          |
|------|------------|------------|------------|------|------------|------------|------------|
| C    | -0.7069220 | -0.2873500 | 0.9881320  | H    | -0.4568220 | 1.6871550  | -0.8389580 |
| H    | -1.2314030 | 0.1316480  | 1.8791130  | H    | -2.0665940 | 1.4462310  | -1.5474710 |
| H    | -0.6634400 | -1.3778250 | 1.1455440  | H    | -1.9342340 | 2.0004390  | 0.1464540  |
| C    | 0.7069200  | 0.2873500  | 0.9881310  | H    | -3.2859930 | -0.5139240 | -1.1202870 |
| H    | 0.6634390  | 1.3778260  | 1.1455410  | H    | -2.7063940 | -1.6921760 | 0.0813540  |
| H    | 1.2314020  | -0.1316450 | 1.8791130  | C    | -1.4765480 | 1.3414990  | -0.6259160 |
| N    | 1.4485050  | 0.0487120  | -0.2313130 |      |            |            |            |
| C    | 1.4765500  | -1.3415010 | -0.6259140 |      |            |            |            |
| H    | 2.0665920  | -1.4462320 | -1.5474720 |      |            |            |            |
| H    | 1.9342410  | -2.0004380 | 0.1464540  |      |            |            |            |
| H    | 0.4568250  | -1.6871590 | -0.8389530 |      |            |            |            |
| C    | 2.7719550  | 0.6196250  | -0.1542410 |      |            |            |            |
| H    | 3.4050460  | 0.1394960  | 0.6255900  |      |            |            |            |
| H    | 3.2859950  | 0.5139200  | -1.1202840 |      |            |            |            |
| H    | 2.7063920  | 1.6921780  | 0.0813480  |      |            |            |            |
| N    | -1.4485050 | -0.0487130 | -0.2313130 |      |            |            |            |
| C    | -2.7719560 | -0.6196240 | -0.1542410 |      |            |            |            |
| H    | -3.4050490 | -0.1394900 | 0.6255850  |      |            |            |            |



**Table S21.** Geometric coordinates and single point energies for (*1R,2R*)-*N,N,N',N'*-tetramethylcyclohexane-1,2-diamine ((*R,R*)-TMCDA).

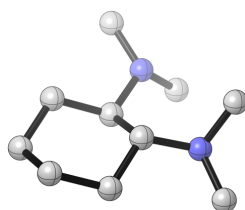

G = -502.865558 Hartrees

G<sub>SP</sub> = -503.4291549 Hartrees

| Atom | X          | Y          | Z          | Atom | X          | Y         | Z          |
|------|------------|------------|------------|------|------------|-----------|------------|
| C    | 0.1791590  | 0.7242740  | 0.2795520  | H    | 3.5991680  | 1.2533800 | -0.1192610 |
| C    | 1.4437220  | 1.4481450  | -0.1965420 | H    | 2.7645600  | 0.7269580 | 1.3480470  |
| C    | 2.7095080  | 0.7189340  | 0.2461000  | H    | 1.4305010  | 1.5153780 | -1.2983280 |
| C    | 2.7083270  | -0.7233460 | -0.2461350 | H    | 1.4567010  | 2.4773460 | 0.1879840  |
| C    | 1.4413910  | -1.4504990 | 0.1965400  | H    | 0.2618800  | 0.6304220 | 1.3849360  |
| C    | 0.1779500  | -0.7245480 | -0.2795170 | N    | -1.0630290 | 1.4398430 | -0.0394690 |
| H    | 0.2609650  | -0.6307140 | -1.3848810 | C    | -2.0570620 | 1.3093190 | 1.0080180  |
| N    | -1.0653700 | -1.4381000 | 0.0393240  | H    | -3.0369110 | 1.6525400 | 0.6413470  |
| C    | -2.0590870 | -1.3061450 | -1.0082650 | H    | -2.1415890 | 0.2585220 | 1.3064400  |
| H    | -1.8019980 | -1.9118890 | -1.9057340 | H    | -1.7990060 | 1.9143440 | 1.9056850  |
| H    | -3.0395630 | -1.6475930 | -0.6416020 | C    | -0.9665200 | 2.8149540 | -0.4756850 |
| H    | -2.1417970 | -0.2552760 | -1.3069470 | H    | -0.6134610 | 3.5135310 | 0.3143290  |
| C    | -0.9712380 | -2.8132070 | 0.4760260  | H    | -0.3073240 | 2.9192760 | -1.3459700 |
| H    | -0.6192110 | -3.5126670 | -0.3136880 | H    | -1.9672820 | 3.1530940 | -0.7826840 |
| H    | -0.3123510 | -2.9183720 | 1.3464420  |      |            |           |            |
| H    | -1.9726020 | -3.1496100 | 0.7829760  |      |            |           |            |
| H    | 1.4526520  | -2.4797030 | -0.1880320 |      |            |           |            |
| H    | 1.4280980  | -1.5177540 | 1.2983240  |      |            |           |            |
| H    | 2.7633270  | -0.7314530 | -1.3480850 |      |            |           |            |
| H    | 3.5971320  | -1.2592500 | 0.1191800  |      |            |           |            |

**Table S22.** Geometric coordinates and single point energies for 2,2'-bipyridine (bipy).

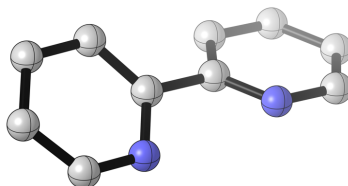

G = -494.662501 Hartrees

G<sub>SP</sub> = -495.2079865 Hartrees

| Atom | X          | Y          | Z          | Atom | X | Y | Z |
|------|------------|------------|------------|------|---|---|---|
| C    | -0.7479110 | 0.0013160  | 0.0003520  |      |   |   |   |
| C    | -1.4628240 | 1.1541000  | 0.3549010  |      |   |   |   |
| C    | -2.8535720 | 1.1128720  | 0.3421420  |      |   |   |   |
| C    | -3.4832600 | -0.0727670 | -0.0237520 |      |   |   |   |
| C    | -2.6808090 | -1.1664690 | -0.3555200 |      |   |   |   |
| H    | -3.1410330 | -2.1158240 | -0.6473670 |      |   |   |   |
| N    | -1.3539440 | -1.1360400 | -0.3436700 |      |   |   |   |
| H    | -4.5698930 | -0.1566930 | -0.0493300 |      |   |   |   |
| H    | -3.4356710 | 1.9922550  | 0.6225350  |      |   |   |   |
| H    | -0.9353470 | 2.0582330  | 0.6603200  |      |   |   |   |
| C    | 0.7479110  | 0.0013150  | -0.0003540 |      |   |   |   |
| C    | 1.4628240  | 1.1541000  | -0.3549020 |      |   |   |   |
| C    | 2.8535720  | 1.1128720  | -0.3421420 |      |   |   |   |
| C    | 3.4832600  | -0.0727660 | 0.0237540  |      |   |   |   |
| C    | 2.6808090  | -1.1664690 | 0.3555210  |      |   |   |   |
| H    | 3.1410330  | -2.1158230 | 0.6473720  |      |   |   |   |
| N    | 1.3539440  | -1.1360410 | 0.3436680  |      |   |   |   |
| H    | 4.5698930  | -0.1566920 | 0.0493350  |      |   |   |   |
| H    | 3.4356720  | 1.9922560  | -0.6225320 |      |   |   |   |
| H    | 0.9353470  | 2.0582330  | -0.6603210 |      |   |   |   |

**Table S23.** Geometric coordinates and single point energies for 1,2-dimethoxyethane (DME).

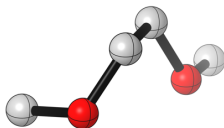

G = -308.347018 Hartrees

G<sub>SP</sub> = -308.7116513 Hartrees

| Atom | X          | Y          | Z          | Atom | X | Y | Z |
|------|------------|------------|------------|------|---|---|---|
| C    | 0.8545320  | 1.0807780  | -0.0333880 |      |   |   |   |
| H    | 1.4082410  | 1.5961330  | 0.7787710  |      |   |   |   |
| H    | 0.6933360  | 1.8015900  | -0.8470190 |      |   |   |   |
| C    | -0.4922100 | 0.6499760  | 0.5210180  |      |   |   |   |
| H    | -0.3631990 | 0.0258080  | 1.4291910  |      |   |   |   |
| H    | -1.0482120 | 1.5558250  | 0.8379540  |      |   |   |   |
| O    | -1.1877530 | -0.0582110 | -0.4594400 |      |   |   |   |
| C    | -2.4357060 | -0.5086350 | -0.0274660 |      |   |   |   |
| H    | -3.0965540 | 0.3302800  | 0.2617460  |      |   |   |   |
| H    | -2.3453150 | -1.1869650 | 0.8423880  |      |   |   |   |
| H    | -2.9043750 | -1.0569690 | -0.8538690 |      |   |   |   |
| O    | 1.6140040  | 0.0440770  | -0.5803980 |      |   |   |   |
| C    | 1.8299410  | -1.0406890 | 0.2708620  |      |   |   |   |
| H    | 2.5777850  | -1.6888460 | -0.2031870 |      |   |   |   |
| H    | 2.2191200  | -0.7216180 | 1.2575770  |      |   |   |   |
| H    | 0.9098240  | -1.6307360 | 0.4289980  |      |   |   |   |

**Table S24.** Geometric coordinates and single point energies for *N,N,N',N'',N'''*-nonamethylimidodiphosphoramidate (NIPA).

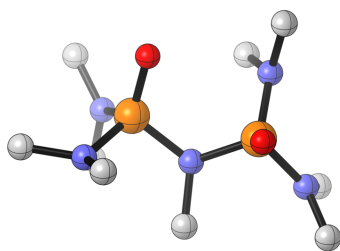

G = -1464.665262 Hartrees

G<sub>SP</sub> = -1465.855078 Hartrees

| Atom | X          | Y          | Z          | Atom | X          | Y          | Z          |
|------|------------|------------|------------|------|------------|------------|------------|
| C    | -3.0047680 | 0.3528710  | 1.8834350  | H    | 2.7533190  | 2.9113670  | 1.2325640  |
| N    | -2.7876000 | -0.4771510 | 0.7234100  | C    | 2.2771890  | 0.4399120  | 2.3130710  |
| P    | -1.6030490 | -0.1432410 | -0.4146260 | H    | 1.4414450  | -0.2218190 | 2.5712780  |
| N    | -1.5979910 | 1.4900890  | -0.7003370 | H    | 3.2235960  | -0.1053700 | 2.4922420  |
| C    | -1.7948540 | 1.9273580  | -2.0759290 | H    | 2.2457140  | 1.2954020  | 3.0067580  |
| H    | -0.8181520 | 2.1577370  | -2.5326030 | N    | 2.1725470  | -1.3661610 | -0.4499200 |
| H    | -2.2697620 | 1.1271930  | -2.6542700 | C    | 3.6229940  | -1.3527880 | -0.4594830 |
| H    | -2.4382720 | 2.8211730  | -2.0953520 | H    | 4.0041040  | -0.6780390 | 0.3182410  |
| C    | -0.9289620 | 2.4702520  | 0.1342300  | H    | 4.0000970  | -2.3653420 | -0.2478020 |
| H    | -1.6091330 | 3.3071260  | 0.3677510  | H    | 4.0339900  | -1.0317390 | -1.4342740 |
| H    | -0.5899400 | 2.0182140  | 1.0756700  | C    | 1.5804260  | -2.2909970 | -1.4116710 |
| H    | -0.0392100 | 2.8609750  | -0.3863190 | H    | 1.7754460  | -3.3309640 | -1.1047800 |
| O    | -1.7876450 | -1.0052720 | -1.6127800 | H    | 0.4934890  | -2.1323650 | -1.4800510 |
| N    | -0.1327290 | -0.4662770 | 0.4297720  | H    | 1.9981690  | -2.1368530 | -2.4215870 |
| P    | 1.3349920  | 0.0766480  | -0.2395450 | C    | -0.2003040 | -1.6886900 | 1.2423490  |
| O    | 1.1385000  | 0.9238540  | -1.4458080 | H    | -0.7450690 | -1.5042830 | 2.1807500  |
| N    | 2.1527190  | 0.9145840  | 0.9543730  | H    | -0.7101010 | -2.4995600 | 0.6958850  |
| C    | 2.9894020  | 2.0431260  | 0.5946730  | H    | 0.8119510  | -2.0388060 | 1.4718840  |
| H    | 4.0640600  | 1.8128260  | 0.7163460  | C    | -3.4776430 | -1.7502430 | 0.7084390  |
| H    | 2.7987640  | 2.3129410  | -0.4509070 | H    | -3.1654680 | -2.4020110 | 1.5464410  |

|   |            |            |            |
|---|------------|------------|------------|
| H | -4.5660260 | -1.5922910 | 0.7890290  |
| H | -3.2697360 | -2.2582790 | -0.2407850 |
| H | -4.0799090 | 0.3802520  | 2.1225200  |
| H | -2.4701820 | -0.0118810 | 2.7826690  |
| H | -2.6886640 | 1.3842410  | 1.6842110  |

**Table S25.** Geometric coordinates and single point energies for *N,N,N',N'',N'''*-pentamethyldiethylenetriamine (PMDTA).

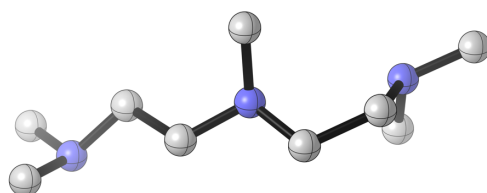

G = -520.058617 Hartrees

G<sub>SP</sub> = -520.6513216 Hartrees

| Atom | X          | Y          | Z          | Atom | X          | Y          | Z          |
|------|------------|------------|------------|------|------------|------------|------------|
| C    | 2.6833450  | -0.8495710 | -0.3928530 | C    | -4.0405990 | -0.7597630 | -0.6056820 |
| H    | 3.2989410  | -1.1266260 | -1.2809410 | H    | -4.3430170 | -1.3218340 | 0.3069280  |
| H    | 2.9230330  | -1.5917790 | 0.3863840  | H    | -4.9514370 | -0.5176710 | -1.1715430 |
| C    | 1.2199890  | -0.9883810 | -0.8035260 | H    | -3.4300690 | -1.4267990 | -1.2291420 |
| H    | 1.0584520  | -0.4875470 | -1.7719120 | N    | 3.0391550  | 0.4562450  | 0.1189160  |
| H    | 1.0318590  | -2.0728530 | -0.9818120 | C    | 4.4337430  | 0.5068040  | 0.4880520  |
| N    | 0.2743120  | -0.4290910 | 0.1413170  | H    | 5.1158940  | 0.3797300  | -0.3824810 |
| C    | 0.4679140  | -0.9189630 | 1.4894820  | H    | 4.6644970  | 1.4719280  | 0.9613350  |
| H    | -0.2552300 | -0.4486120 | 2.1684550  | H    | 4.6612410  | -0.2905080 | 1.2111100  |
| H    | 0.3415250  | -2.0227500 | 1.5663810  | C    | 2.6697610  | 1.5398530  | -0.7636740 |
| H    | 1.4706880  | -0.6420920 | 1.8383050  | H    | 2.9828230  | 2.4947980  | -0.3181560 |
| C    | -1.0837670 | -0.6057560 | -0.3358280 | H    | 3.1471210  | 1.4607710  | -1.7666180 |
| H    | -1.3630530 | -1.6846760 | -0.3455120 | H    | -3.6248230 | 2.3434830  | 0.5592770  |
| H    | -1.1321730 | -0.2510200 | -1.3779180 | H    | 1.5790210  | 1.5664120  | -0.8838500 |
| C    | -2.1054390 | 0.2081860  | 0.4552410  | H    | -4.5308690 | 1.0320940  | 1.3711990  |
| H    | -2.3377160 | -0.2858710 | 1.4269520  |      |            |            |            |
| H    | -1.6367970 | 1.1773270  | 0.6878120  |      |            |            |            |
| N    | -3.3218030 | 0.4562360  | -0.2956520 |      |            |            |            |
| C    | -4.1714280 | 1.4056090  | 0.3862310  |      |            |            |            |
| H    | -5.0526770 | 1.6322550  | -0.2309760 |      |            |            |            |

**Table S26.** Geometric coordinates and single point energies for 1-methoxy-2-(2-methoxyethoxy)ethane (diglyme).

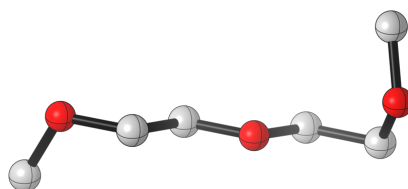

G = -461.935402 Hartrees

G<sub>SP</sub> = -462.4788181 Hartrees

| Atom | X          | Y          | Z          | Atom | X         | Y          | Z         |
|------|------------|------------|------------|------|-----------|------------|-----------|
| C    | 2.5518820  | 0.9555020  | -0.3165470 | H    | 3.6327440 | -2.1081760 | 0.0188110 |
| H    | 3.3256950  | 1.4871730  | 0.2751590  | H    | 3.7306280 | -0.7839770 | 1.2167830 |
| H    | 2.4105220  | 1.5000100  | -1.2605470 | H    | 2.1446870 | -1.5229410 | 0.8110630 |
| C    | 1.2557620  | 0.9885800  | 0.4744360  |      |           |            |           |
| H    | 1.3991070  | 0.5585950  | 1.4860960  |      |           |            |           |
| H    | 0.9567660  | 2.0461690  | 0.6189120  |      |           |            |           |
| O    | 0.2766470  | 0.2742170  | -0.2198280 |      |           |            |           |
| C    | -0.9563050 | 0.2246470  | 0.4374950  |      |           |            |           |
| H    | -1.3617120 | 1.2453200  | 0.5877830  |      |           |            |           |
| H    | -0.8605200 | -0.2394720 | 1.4385500  |      |           |            |           |
| C    | -1.9023340 | -0.6098980 | -0.4127050 |      |           |            |           |
| H    | -1.9658070 | -0.1670870 | -1.4242990 |      |           |            |           |
| H    | -1.4794720 | -1.6190270 | -0.5186280 |      |           |            |           |
| O    | -3.1662040 | -0.7330100 | 0.1769020  |      |           |            |           |
| C    | -4.0359690 | 0.3285350  | -0.0920210 |      |           |            |           |
| H    | -4.2227440 | 0.4324610  | -1.1767160 |      |           |            |           |
| H    | -4.9885380 | 0.1150090  | 0.4086460  |      |           |            |           |
| H    | -3.6567330 | 1.2958290  | 0.2841660  |      |           |            |           |
| O    | 2.9805500  | -0.3258760 | -0.6693740 |      |           |            |           |
| C    | 3.1215370  | -1.2144540 | 0.3981120  |      |           |            |           |

**Table S27.** Geometric coordinates and single point energies for 12-crown-4.

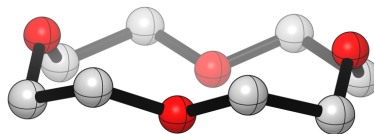

G = -614.356638 Hartrees

G<sub>SP</sub> = -615.070846 Hartrees

| Atom | X          | Y          | Z          | Atom | X          | Y          | Z          |
|------|------------|------------|------------|------|------------|------------|------------|
| C    | 0.2505660  | 2.3482010  | 1.2081860  | H    | 1.3360610  | 2.2584590  | -1.0302090 |
| H    | 0.0718640  | 3.2832680  | 1.7681530  | H    | 0.1796140  | 1.2991110  | -3.0896610 |
| H    | 1.3360610  | 2.2584590  | 1.0302090  | H    | -1.2985940 | 1.1604510  | -2.0906590 |
| C    | -0.1923090 | 1.1734570  | 2.0516710  | H    | -1.2985990 | -1.1604470 | -2.0906430 |
| H    | 0.1796140  | 1.2991110  | 3.0896610  | H    | 0.1796000  | -1.2991070 | -3.0896580 |
| H    | -1.2985940 | 1.1604510  | 2.0906590  | H    | 0.0718690  | -3.2832620 | -1.7681620 |
| O    | 0.2990340  | 0.0000030  | 1.4794900  | H    | 1.3360640  | -2.2584560 | -1.0302110 |
| C    | -0.1923130 | -1.1734530 | 2.0516650  |      |            |            |            |
| H    | 0.1796000  | -1.2991070 | 3.0896580  |      |            |            |            |
| H    | -1.2985990 | -1.1604470 | 2.0906430  |      |            |            |            |
| C    | 0.2505680  | -2.3481990 | 1.2081860  |      |            |            |            |
| H    | 0.0718690  | -3.2832620 | 1.7681620  |      |            |            |            |
| H    | 1.3360640  | -2.2584560 | 1.0302110  |      |            |            |            |
| O    | -0.4586510 | -2.3790310 | 0.0000000  |      |            |            |            |
| C    | 0.2505680  | -2.3481990 | -1.2081860 |      |            |            |            |
| C    | -0.1923130 | -1.1734530 | -2.0516650 |      |            |            |            |
| O    | 0.2990340  | 0.0000030  | -1.4794900 |      |            |            |            |
| C    | -0.1923090 | 1.1734570  | -2.0516710 |      |            |            |            |
| C    | 0.2505660  | 2.3482010  | -1.2081860 |      |            |            |            |
| O    | -0.4586560 | 2.3790110  | 0.0000000  |      |            |            |            |
| H    | 0.0718640  | 3.2832680  | -1.7681530 |      |            |            |            |



**Table S28.** Geometric coordinates and single point energies for 15-crown-5.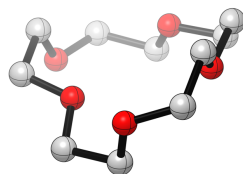

G = -767.952198 Hartrees

G<sub>SP</sub> = -768.844353 Hartrees

| Atom | X          | Y          | Z          | Atom | X          | Y          | Z          |
|------|------------|------------|------------|------|------------|------------|------------|
| C    | 0.4305190  | -0.6200380 | -2.4999700 | C    | 0.9068120  | -2.5208980 | -1.2221400 |
| H    | 0.3717800  | -1.1171900 | -3.4885590 | O    | 0.0000000  | -1.4898330 | -1.4924220 |
| H    | 1.4817020  | -0.3153580 | -2.3382540 | H    | 1.1287510  | -3.0989190 | -2.1431310 |
| C    | -0.4305190 | 0.6200380  | -2.4999700 | H    | 1.8596800  | -2.1044590 | -0.8434060 |
| H    | -0.3717800 | 1.1171900  | -3.4885590 | H    | 0.9983560  | -4.3234560 | -0.0831100 |
| H    | -1.4817020 | 0.3153580  | -2.3382540 | H    | -0.6557410 | -3.8194210 | -0.5134400 |
| O    | 0.0000000  | 1.4898330  | -1.4924220 | H    | -1.6699100 | -2.8270100 | 1.8550430  |
| C    | -0.9068120 | 2.5208980  | -1.2221400 | H    | -1.3877640 | -1.7499120 | 0.4425430  |
| H    | -1.1287510 | 3.0989190  | -2.1431310 | H    | -1.5432300 | -0.6160170 | 2.7507000  |
| H    | -1.8596800 | 2.1044590  | -0.8434060 | H    | 0.0502040  | -1.3600880 | 3.0832910  |
| C    | -0.3313070 | 3.4523910  | -0.1755290 | H    | -0.0502040 | 1.3600880  | 3.0832910  |
| H    | 0.6557410  | 3.8194210  | -0.5134400 | H    | 1.5432300  | 0.6160170  | 2.7507000  |
| H    | -0.9983560 | 4.3234560  | -0.0831100 | H    | 1.6699100  | 2.8270100  | 1.8550430  |
| O    | -0.2505450 | 2.8522540  | 1.0851460  | H    | 1.3877640  | 1.7499120  | 0.4425430  |
| C    | 0.9410100  | 2.1547810  | 1.3636740  |      |            |            |            |
| C    | 0.6171430  | 0.9981180  | 2.2769900  |      |            |            |            |
| O    | 0.0000000  | 0.0000000  | 1.5195940  |      |            |            |            |
| C    | -0.6171430 | -0.9981180 | 2.2769900  |      |            |            |            |
| C    | -0.9410100 | -2.1547810 | 1.3636740  |      |            |            |            |
| O    | 0.2505450  | -2.8522540 | 1.0851460  |      |            |            |            |
| C    | 0.3313070  | -3.4523910 | -0.1755290 |      |            |            |            |

**Table S29** Geometric coordinates and single point energies for 18-crown-6.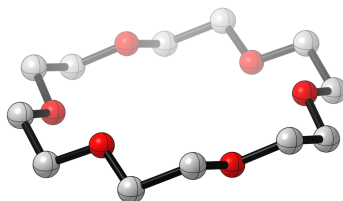

G = -921.537616 Hartrees

G<sub>SP</sub> = -922.6124367 Hartrees

| Atom | X          | Y          | Z          | Atom | X         | Y          | Z          |
|------|------------|------------|------------|------|-----------|------------|------------|
| C    | -1.1661250 | 3.4073030  | 0.2966740  | C    | 3.5338730 | -0.6937570 | 0.2966740  |
| H    | -1.2275390 | 4.4932020  | 0.0781630  | C    | 3.5338730 | 0.6937570  | -0.2966740 |
| H    | -1.1904630 | 3.2834960  | 1.3965600  | O    | 2.4777930 | 1.4305540  | 0.2417800  |
| C    | -2.3677480 | 2.7135460  | -0.2966740 | C    | 2.3677480 | 2.7135460  | -0.2966740 |
| H    | -3.2774570 | 3.3096810  | -0.0781630 | C    | 1.1661250 | 3.4073030  | 0.2966740  |
| H    | -2.2483600 | 2.6727190  | -1.3965600 | O    | 0.0000000 | 2.8611090  | -0.2417800 |
| O    | -2.4777930 | 1.4305540  | 0.2417800  | H    | 1.2275390 | 4.4932020  | 0.0781630  |
| C    | -3.5338730 | 0.6937570  | -0.2966740 | H    | 1.1904630 | 3.2834960  | 1.3965600  |
| H    | -4.5049960 | 1.1835210  | -0.0781630 | H    | 3.2774570 | 3.3096810  | -0.0781630 |
| H    | -3.4388230 | 0.6107770  | -1.3965600 | H    | 2.2483600 | 2.6727190  | -1.3965600 |
| C    | -3.5338730 | -0.6937570 | 0.2966740  | H    | 4.5049960 | 1.1835210  | -0.0781630 |
| H    | -4.5049960 | -1.1835210 | 0.0781630  | H    | 3.4388230 | 0.6107770  | -1.3965600 |
| H    | -3.4388230 | -0.6107770 | 1.3965600  | H    | 4.5049960 | -1.1835210 | 0.0781630  |
| O    | -2.4777930 | -1.4305540 | -0.2417800 | H    | 3.4388230 | -0.6107770 | 1.3965600  |
| C    | -2.3677480 | -2.7135460 | 0.2966740  | H    | 2.2483600 | -2.6727190 | 1.3965600  |
| H    | -3.2774570 | -3.3096810 | 0.0781630  | H    | 3.2774570 | -3.3096810 | 0.0781630  |
| H    | -2.2483600 | -2.6727190 | 1.3965600  | H    | 1.2275390 | -4.4932020 | -0.0781630 |
| C    | -1.1661250 | -3.4073030 | -0.2966740 | H    | 1.1904630 | -3.2834960 | -1.3965600 |
| H    | -1.2275390 | -4.4932020 | -0.0781630 | C    | 1.1661250 | -3.4073030 | -0.2966740 |
| H    | -1.1904630 | -3.2834960 | -1.3965600 | C    | 2.3677480 | -2.7135460 | 0.2966740  |
| O    | 0.0000000  | -2.8611090 | 0.2417800  | O    | 2.4777930 | -1.4305540 | -0.2417800 |

**Table S30.** Geometric coordinates and single point energies for TDA-1.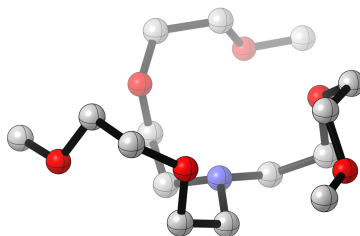

G = -1095.676597 Hartrees

G<sub>SP</sub> = -1096.938665 Hartrees

| Atom | X          | Y          | Z          | Atom | X          | Y          | Z          |
|------|------------|------------|------------|------|------------|------------|------------|
| C    | -4.3924890 | 0.6252980  | -0.1800840 | H    | 1.1864310  | -0.8895640 | 2.7840680  |
| O    | -3.3981500 | 1.6113960  | -0.1125500 | H    | 0.7613040  | -1.9308170 | 1.4028460  |
| C    | -2.5515540 | 1.5997520  | -1.2381230 | C    | -1.3113120 | -0.4585050 | 1.6766010  |
| C    | -1.5410210 | 2.7283080  | -1.1494230 | C    | -1.7728790 | -1.7586310 | 1.0398060  |
| O    | -0.4234850 | 2.4305540  | -0.3554660 | O    | -1.8945140 | -1.5818480 | -0.3544490 |
| C    | -0.6368110 | 2.4139760  | 1.0389400  | C    | -1.5930550 | -2.6980210 | -1.1488220 |
| C    | 0.2588220  | 1.3647090  | 1.6758860  | C    | -0.1102460 | -3.0078390 | -1.2379610 |
| N    | 0.0000790  | -0.0003160 | 1.2529630  | O    | 0.3035090  | -3.7474270 | -0.1129620 |
| C    | 1.0528270  | -0.9068740 | 1.6762320  | C    | 1.6544940  | -4.1159210 | -0.1814910 |
| C    | 2.4094990  | -0.6559930 | 1.0394980  | H    | 1.8367120  | -4.7985190 | -1.0332420 |
| O    | 2.3174920  | -0.8492370 | -0.3548840 | H    | 1.9079660  | -4.6417900 | 0.7480630  |
| C    | 3.1340890  | -0.0302070 | -1.1487830 | H    | 2.3014180  | -3.2293440 | -0.2969720 |
| C    | 2.6619630  | 1.4091980  | -1.2377750 | H    | 0.4571840  | -2.0606670 | -1.3017800 |
| O    | 3.0949230  | 2.1366840  | -0.1121170 | H    | 0.0779590  | -3.5984890 | -2.1575790 |
| C    | 2.7378060  | 3.4907780  | -0.1798580 | H    | -1.9608230 | -2.4576800 | -2.1569390 |
| H    | 3.0658440  | 3.9728200  | 0.7501330  | H    | -2.1278390 | -3.6010800 | -0.7975780 |
| H    | 3.2378700  | 3.9907190  | -1.0311000 | H    | -2.7595460 | -2.0165910 | 1.4714880  |
| H    | 1.6465080  | 3.6072290  | -0.2957940 | H    | -1.0926500 | -2.5924960 | 1.2621580  |
| H    | 1.5580510  | 1.4279240  | -1.3026630 | H    | -2.0522390 | 0.3060860  | 1.4035140  |
| H    | 3.0804500  | 1.8675820  | -2.1568690 | H    | -1.3627670 | -0.5829450 | 2.7844440  |

|   |            |            |            |
|---|------------|------------|------------|
| H | 4.1834130  | -0.0424570 | -0.7971160 |
| H | 3.1099740  | -0.4685970 | -2.1570160 |
| H | 2.7911660  | 0.3500890  | 1.2622130  |
| H | 3.1264850  | -1.3813390 | 1.4710100  |
| H | -2.0549200 | 3.6432990  | -0.7979140 |
| H | -1.1492830 | 2.9262910  | -2.1577120 |
| H | -3.1576810 | 1.7326080  | -2.1573350 |
| H | -2.0156400 | 0.6344640  | -1.3024850 |
| H | -5.0755870 | 0.8084890  | -1.0312130 |
| H | -4.9737910 | 0.6685310  | 0.7500070  |
| H | -3.9479090 | -0.3781230 | -0.2959570 |
| H | 0.1770910  | 1.4720330  | 2.7837000  |
| H | 1.2912940  | 1.6241520  | 1.4024620  |
| H | -1.6989210 | 2.2415570  | 1.2617710  |
| H | -0.3670690 | 3.3976760  | 1.4702270  |

**Table S31.** Geometric coordinates and single point energies for [2.2.2]-cryptand.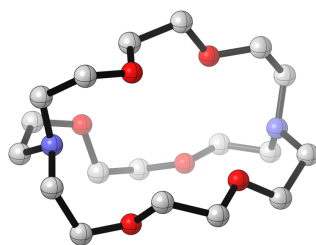

G = -1266.283094 Hartrees

G<sub>SP</sub> = -1267.734192 Hartrees

| Atom | X          | Y          | Z          | Atom | X          | Y          | Z          |
|------|------------|------------|------------|------|------------|------------|------------|
| C    | -3.5119160 | -0.5856540 | -1.2605280 | H    | -1.5351590 | -1.1268220 | 3.2719780  |
| N    | -3.1056950 | 0.0009780  | -0.0004380 | H    | 0.6321260  | -2.4750470 | 2.7139630  |
| C    | -3.5125540 | 1.3854160  | 0.1210400  | H    | 0.7007460  | -1.0859880 | 3.8368940  |
| C    | -2.7087100 | 2.1867200  | 1.1420120  | H    | 2.6842050  | -2.2795680 | 1.3899730  |
| O    | -1.3260500 | 2.1436020  | 0.9605130  | H    | 3.0338690  | -1.5738970 | 2.9891940  |
| C    | -0.8863200 | 2.5745710  | -0.3077600 | H    | 4.7417480  | -0.8113570 | 1.4626450  |
| C    | 0.5302730  | 3.0977860  | -0.2036910 | H    | 3.7136730  | 0.5404440  | 1.9785520  |
| O    | 1.4511990  | 2.0577750  | -0.3461760 | C    | 3.7263310  | -0.9901270 | -0.9986030 |
| C    | 2.7111350  | 2.3596820  | 0.1707270  | C    | 2.7110460  | -1.0312160 | -2.1263180 |
| C    | 3.7253480  | 1.3619400  | -0.3588290 | O    | 1.4524920  | -1.3311400 | -1.6049240 |
| N    | 3.4187740  | 0.0010670  | 0.0004500  | C    | 0.5307190  | -1.7286980 | -2.5757520 |
| C    | 3.7253690  | -0.3682260 | 1.3585620  | C    | -0.8855500 | -1.5544630 | -2.0706450 |
| C    | 2.7117520  | -1.3272640 | 1.9562360  | O    | -1.3236160 | -0.2404650 | -2.3341480 |
| O    | 1.4514970  | -0.7295390 | 1.9525290  | C    | -2.7059470 | -0.1033610 | -2.4640670 |
| C    | 0.5301460  | -1.3751050 | 2.7798350  | H    | -3.0733310 | -0.6603790 | -3.3514300 |
| C    | -0.8863690 | -1.0217420 | 2.3797020  | H    | -2.8889770 | 0.9637090  | -2.6607830 |
| O    | -1.3277500 | -1.9042490 | 1.3726600  | H    | -1.5355900 | -2.2742190 | -2.6068930 |
| C    | -2.7105460 | -2.0820580 | 1.3204050  | H    | -0.9159750 | -1.7691380 | -0.9873850 |
| C    | -3.5134470 | -0.7965590 | 1.1373900  | H    | 0.6335300  | -1.1266080 | -3.4985020 |
| H    | -4.5940020 | -1.0668190 | 1.0916080  | H    | 0.6998980  | -2.7903340 | -2.8483810 |

|   |            |            |            |
|---|------------|------------|------------|
| H | -3.3931560 | -0.1878220 | 2.0445450  |
| H | -2.8961580 | -2.7854600 | 0.4948310  |
| H | -3.0780250 | -2.5712030 | 2.2468660  |
| H | -0.9156850 | 0.0245440  | 2.0262390  |
| H | 3.7154930  | 1.4440310  | -1.4558410 |
| H | 4.7411790  | 1.6739330  | -0.0257030 |
| H | 3.0340810  | 3.3771000  | -0.1328180 |
| H | 2.6824610  | 2.3467890  | 1.2785850  |
| H | 0.7007390  | 3.8662250  | -0.9850470 |
| H | 0.6327590  | 3.5938050  | 0.7802170  |
| H | -0.9165130 | 1.7452890  | -1.0370390 |
| H | -1.5354300 | 3.3999630  | -0.6621010 |
| H | -3.0765630 | 3.2335240  | 1.1029500  |
| H | -2.8931580 | 1.8232450  | 2.1641060  |
| H | -3.3926910 | 1.8661930  | -0.8599830 |
| H | -4.5928850 | 1.4815650  | 0.3786470  |
| H | -4.5917590 | -0.4092020 | -1.4738580 |
| H | -3.3936680 | -1.6757630 | -1.1861670 |
| H | 2.6795170  | -0.0644730 | -2.6673300 |
| H | 3.0345210  | -1.8011480 | -2.8571530 |
| H | 4.7416270  | -0.8558310 | -1.4359880 |
| H | 3.7182650  | -1.9813170 | -0.5214070 |

**Table S32.** Geometric coordinates and single point energies for NaHMDS unsolvated monomer.

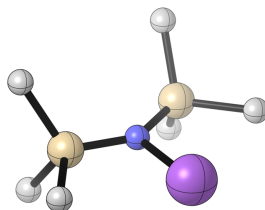

G = -1034.7736 Hartrees

G<sub>SP</sub> = -1035.375722 Hartrees

| Atom | X          | Y          | Z          | Atom | X          | Y          | Z          |
|------|------------|------------|------------|------|------------|------------|------------|
| Si   | -1.5699080 | -0.2392140 | 0.0001360  | H    | -3.8262110 | 0.9556380  | 0.0054040  |
| N    | 0.0000010  | 0.3957450  | 0.0000670  | H    | -2.6198020 | 1.8800110  | 0.9061000  |
| Si   | 1.5699100  | -0.2392170 | -0.0001170 | H    | -2.6220470 | 1.8839020  | -0.8940440 |
| C    | 2.0109970  | -1.2712870 | 1.5253290  | C    | -2.0107950 | -1.2715990 | -1.5251550 |
| H    | 3.0686840  | -1.5782380 | 1.5244400  | H    | -1.8147000 | -0.7058580 | -2.4490660 |
| H    | 1.8150410  | -0.7053390 | 2.4491440  | H    | -1.3956320 | -2.1844240 | -1.5610690 |
| H    | 1.3958090  | -2.1840850 | 1.5615240  | H    | -3.0684910 | -1.5785200 | -1.5243390 |
| C    | 2.7674060  | 1.2565060  | -0.0053120 | H    | -1.3936180 | -2.1935460 | 1.5495390  |
| H    | 2.6221810  | 1.8840600  | 0.8935240  | C    | -2.7674050 | 1.2565090  | 0.0048820  |
| H    | 3.8262120  | 0.9556380  | -0.0059290 |      |            |            |            |
| H    | 2.6196650  | 1.8798440  | -0.9066190 |      |            |            |            |
| C    | 2.0075550  | -1.2800860 | -1.5205290 |      |            |            |            |
| H    | 1.3934660  | -2.1939060 | -1.5490620 |      |            |            |            |
| H    | 1.8079770  | -0.7201730 | -2.4472350 |      |            |            |            |
| H    | 3.0656180  | -1.5857260 | -1.5209830 |      |            |            |            |
| Na   | 0.0000020  | 2.5420030  | 0.0000060  |      |            |            |            |
| C    | -2.0077610 | -1.2797720 | 1.5207020  |      |            |            |            |
| H    | -1.8083720 | -0.7196430 | 2.4473180  |      |            |            |            |
| H    | -3.0658060 | -1.5854780 | 1.5210480  |      |            |            |            |

**Table S33.** Geometric coordinates and single point energies for NaTMDS unsolvated monomer.

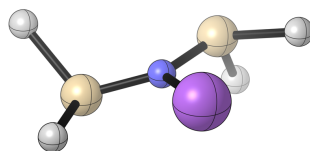

G = -956.273505 Hartrees

G<sub>SP</sub> = -956.7823872 Hartrees

| Atom | X          | Y          | Z          | Atom | X         | Y          | Z          |
|------|------------|------------|------------|------|-----------|------------|------------|
| Si   | 1.5300110  | -0.4910960 | -0.3144320 | C    | 2.7320710 | 0.9769090  | -0.5480500 |
| N    | 0.0000190  | 0.1628100  | -0.0008810 | H    | 2.4195530 | 1.6214430  | -1.3894220 |
| Si   | -1.5297690 | -0.4908860 | 0.3140890  | H    | 2.7854420 | 1.5865020  | 0.3727880  |
| C    | -2.2460350 | -1.5707570 | -1.0612680 | H    | 3.7596760 | 0.6515590  | -0.7696090 |
| H    | -3.2543070 | -1.9349150 | -0.8106860 | H    | 1.6343230 | -1.2960730 | -1.5810620 |
| H    | -2.3028170 | -1.0078400 | -2.0058020 |      |           |            |            |
| H    | -1.6031020 | -2.4468590 | -1.2368230 |      |           |            |            |
| C    | -2.7312370 | 0.9772930  | 0.5496520  |      |           |            |            |
| H    | -2.7853920 | 1.5873330  | -0.3708460 |      |           |            |            |
| H    | -3.7587020 | 0.6520880  | 0.7720710  |      |           |            |            |
| H    | -2.4177220 | 1.6213580  | 1.3910100  |      |           |            |            |
| H    | -1.6327870 | -1.2964380 | 1.5804660  |      |           |            |            |
| Na   | 0.0002450  | 2.3084540  | -0.0003770 |      |           |            |            |
| C    | 2.2444300  | -1.5717680 | 1.0612600  |      |           |            |            |
| H    | 1.6010850  | -2.4477930 | 1.2356900  |      |           |            |            |
| H    | 3.2528970  | -1.9360650 | 0.8116650  |      |           |            |            |
| H    | 2.3002750  | -1.0092930 | 2.0061140  |      |           |            |            |



**Table S34** Geometric coordinates and single point energies for NaCPTMDS unsolvated monomer.

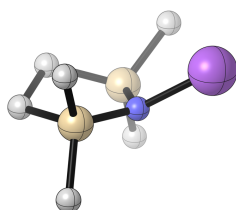

G = -1033.579549 Hartrees

G<sub>SP</sub> = -1034.175637 Hartrees

| Atom | X          | Y          | Z          | Atom | X          | Y          | Z          |
|------|------------|------------|------------|------|------------|------------|------------|
| Si   | -1.4586700 | -0.1068820 | 0.0509860  | H    | -1.5625470 | -2.1439690 | -1.5176200 |
| C    | -0.8892310 | -1.7623000 | -0.7327070 | C    | -2.6264540 | -0.4344900 | 1.5020220  |
| C    | 0.5590940  | -1.5482890 | -1.2420200 | H    | -2.9627390 | 0.5084270  | 1.9614250  |
| H    | 0.5375670  | -1.0456900 | -2.2254210 | H    | -3.5215550 | -0.9923360 | 1.1848710  |
| H    | 1.1052900  | -2.4949440 | -1.3828800 | H    | -2.1119210 | -1.0198050 | 2.2789640  |
| Si   | 1.3433300  | -0.3360980 | 0.0049440  | C    | -2.4516460 | 0.9179710  | -1.2080360 |
| N    | 0.0227370  | 0.6490570  | 0.4779970  | H    | -3.3995900 | 0.4315800  | -1.4866620 |
| Na   | 0.5294680  | 2.7119600  | 0.3712720  | H    | -2.7052750 | 1.9101960  | -0.7958080 |
| C    | 2.1860990  | -1.2898800 | 1.4058280  | H    | -1.8658270 | 1.0706030  | -2.1286150 |
| H    | 3.0255380  | -1.9024740 | 1.0411040  |      |            |            |            |
| H    | 2.5714920  | -0.6032060 | 2.1758800  |      |            |            |            |
| H    | 1.4610090  | -1.9589800 | 1.8942560  |      |            |            |            |
| C    | 2.7114620  | 0.7349650  | -0.7926940 |      |            |            |            |
| H    | 3.1291440  | 1.4584300  | -0.0673580 |      |            |            |            |
| H    | 3.5634640  | 0.1333610  | -1.1450570 |      |            |            |            |
| H    | 2.3222290  | 1.2891870  | -1.6641200 |      |            |            |            |
| H    | -0.8907860 | -2.5214780 | 0.0696920  |      |            |            |            |

**Table S35.** Geometric coordinates and single point energies for NaDPTMDS unsolvated monomer.

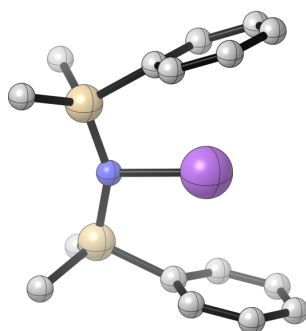

G = -1417.731619 Hartrees

G<sub>SP</sub> = -1418.74092 Hartrees

| Atom | X          | Y          | Z          | Atom | X          | Y          | Z          |
|------|------------|------------|------------|------|------------|------------|------------|
| Si   | -1.6196610 | -1.5579560 | 0.0000410  | H    | 3.2029510  | 2.7442600  | 2.1534450  |
| N    | 0.0000030  | -1.1216560 | -0.0011250 | H    | 3.5121180  | 3.9585220  | -0.0004670 |
| Si   | 1.6196680  | -1.5579510 | 0.0000440  | H    | 3.2100570  | 2.7416040  | -2.1538680 |
| C    | 2.2291420  | -2.4944140 | -1.5238280 | H    | 2.5595130  | 0.3546870  | -2.1542780 |
| H    | 3.3241850  | -2.6085320 | -1.5318570 | Na   | -0.0000010 | 1.1305910  | -0.0018390 |
| H    | 1.7826660  | -3.5011520 | -1.5374180 | C    | -2.2270860 | -2.4938770 | 1.5250730  |
| H    | -1.7827120 | -3.5010660 | -1.5375300 | H    | -1.9185070 | -1.9912170 | 2.4542910  |
| C    | -2.2291500 | -2.4943120 | -1.5238910 | H    | -3.3220580 | -2.6085510 | 1.5342600  |
| H    | -1.9211730 | -1.9923010 | -2.4536580 | H    | -1.7800650 | -3.5003750 | 1.5387920  |
| H    | -3.3241970 | -2.6083920 | -1.5319440 | C    | -2.4976440 | 0.1617570  | 0.0002930  |
| H    | 1.9212000  | -1.9924430 | -2.4536280 | C    | -2.6952400 | 0.8711460  | 1.1993150  |
| C    | 2.2271120  | -2.4937690 | 1.5251340  | C    | -3.0562670 | 2.2221950  | 1.2059280  |
| H    | 1.7801350  | -3.5002850 | 1.5388930  | C    | -3.2326170 | 2.9036730  | -0.0000890 |
| H    | 3.3220890  | -2.6083970 | 1.5343460  | C    | -3.0609590 | 2.2205840  | -1.2058510 |
| H    | 1.9184920  | -1.9910780 | 2.4543220  | C    | -2.6998910 | 0.8695370  | -1.1988630 |
| C    | 2.4976450  | 0.1617640  | 0.0001860  | H    | -2.5601300 | 0.3545770  | -2.1541590 |
| C    | 2.6995450  | 0.8696040  | -1.1989970 | H    | -3.2106830 | 2.7414890  | -2.1536760 |
| C    | 3.0606030  | 2.2206520  | -1.2060250 | H    | -3.5121370 | 3.9585100  | -0.0002500 |

|   |            |           |            |
|---|------------|-----------|------------|
| C | 3.2326030  | 2.9036830 | -0.0002770 |
| C | 3.0566030  | 2.2221460 | 1.2057550  |
| C | 2.6955800  | 0.8710950 | 1.1991820  |
| H | 2.5523780  | 0.3573480 | 2.1546320  |
| H | -2.5517610 | 0.3574450 | 2.1547480  |
| H | -3.2023500 | 2.7443530 | 2.1536350  |

**Table S36.** Geometric coordinates and single point energies for NaHMDS unsolvated dimer.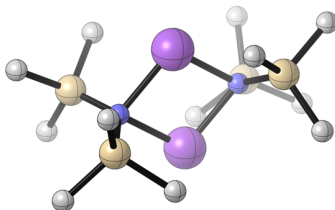

G = -2069.611626 Hartrees

G<sub>SP</sub> = -2070.806016 Hartrees

| Atom | X          | Y          | Z          | Atom | X          | Y          | Z          |
|------|------------|------------|------------|------|------------|------------|------------|
| N    | -1.7952900 | 0.0000070  | -0.0000210 | H    | 3.7529040  | 2.0667410  | 1.6179880  |
| Na   | -0.0000350 | -0.0000810 | 1.4474900  | H    | 3.5015230  | 3.5140390  | 0.6117200  |
| N    | 1.7952170  | -0.0000090 | -0.0000230 | H    | 2.1526310  | 2.8394980  | 1.5571510  |
| Na   | -0.0000360 | 0.0000780  | -1.4475440 | C    | 4.1273480  | 1.1881550  | -1.5406110 |
| Si   | 2.5739460  | -1.4436610 | 0.4883300  | H    | 4.5537770  | 2.1490670  | -1.8682580 |
| C    | 4.1273740  | -1.1880880 | 1.5405950  | H    | 4.9093750  | 0.6493510  | -0.9837050 |
| H    | 4.5538290  | -2.1489850 | 1.8682510  | H    | 3.8935990  | 0.5966520  | -2.4399500 |
| H    | 4.9093840  | -0.6492720 | 0.9836760  | Si   | -2.5739270 | -1.4437020 | -0.4883350 |
| H    | 3.8936180  | -0.5965800 | 2.4399290  | C    | -3.0366690 | -2.5767690 | 0.9544610  |
| C    | 1.3659910  | -2.4280060 | 1.5989490  | H    | -3.5012860 | -3.5141810 | 0.6117190  |
| H    | 1.2145790  | -1.9424860 | 2.5812390  | H    | -2.1523570 | -2.8395940 | 1.5570580  |
| H    | 0.3808220  | -2.5807570 | 1.1238860  | H    | -3.7526740 | -2.0669380 | 1.6180610  |
| H    | 1.7643140  | -3.4293200 | 1.8216880  | C    | -1.3659610 | -2.4279120 | -1.5990640 |
| C    | 3.0369080  | -2.5766680 | -0.9544390 | H    | -1.7642030 | -3.4292570 | -1.8218030 |
| H    | 2.1526590  | -2.8395560 | -1.5571020 | H    | -1.2146730 | -1.9423410 | -2.5813470 |
| H    | 3.7529170  | -2.0667680 | -1.6179820 | H    | -0.3807380 | -2.5805820 | -1.1240840 |
| H    | 3.5015790  | -3.5140430 | -0.6116710 | C    | -4.1274720 | -1.1882880 | -1.5404630 |
| Si   | 2.5739210  | 1.4436720  | -0.4883310 | H    | -4.9095500 | -0.6497070 | -0.9834150 |
| C    | 1.3659460  | 2.4280300  | -1.5989170 | H    | -3.8938950 | -0.5966150 | -2.4397330 |
| H    | 1.2145460  | 1.9425400  | -2.5812220 | H    | -4.5537570 | -2.1492280 | -1.8682170 |
| H    | 0.3807730  | 2.5807450  | -1.1238510 | Si   | -2.5739480 | 1.4436920  | 0.4883350  |

|   |            |           |            |
|---|------------|-----------|------------|
| H | 1.7642490  | 3.4293590 | -1.8216220 |
| C | 3.0368760  | 2.5766440 | 0.9544690  |
| H | -1.7642590 | 3.4292180 | 1.8218680  |
| H | -3.8939060 | 0.5965560 | 2.4397200  |
| C | -3.0367020 | 2.5767910 | -0.9544310 |
| H | -3.7527110 | 2.0669720 | -1.6180370 |
| H | -3.5013180 | 3.5141940 | -0.6116650 |
| H | -2.1523950 | 2.8396290 | -1.5570300 |
| C | -1.3659990 | 2.4278870 | 1.5990960  |
| H | -1.2147040 | 1.9422860 | 2.5813630  |
| H | -0.3807780 | 2.5805900 | 1.1241230  |
| C | -4.1274930 | 1.1882280 | 1.5404500  |
| H | -4.5538050 | 2.1491550 | 1.8682080  |
| H | -4.9095520 | 0.6496290 | 0.9833940  |

**Table S37.** Geometric coordinates and single point energies for NaTMDS unsolvated dimer.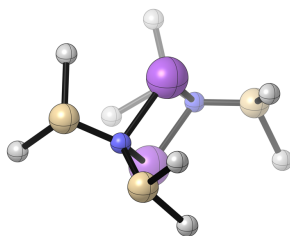

G = -1912.612565 Hartrees

G<sub>SP</sub> = -1913.621594 Hartrees

| Atom | X          | Y          | Z          | Atom | X          | Y          | Z          |
|------|------------|------------|------------|------|------------|------------|------------|
| Na   | -0.0000980 | 0.0001240  | 1.4641640  | H    | 1.9317280  | 3.4477920  | -1.7966210 |
| Si   | -2.5860740 | 1.4592200  | 0.3825700  | H    | 3.9036500  | 1.2678280  | -1.0774470 |
| N    | -1.7786530 | -0.0001200 | -0.0003030 | C    | 2.9203400  | -2.5580260 | -1.1172150 |
| Si   | -2.5854460 | -1.4598990 | -0.3828400 | H    | 3.4395350  | -3.4874520 | -0.8380740 |
| C    | -2.9195090 | -2.5584900 | 1.1173920  | H    | 1.9842020  | -2.8359010 | -1.6285950 |
| H    | -3.4384730 | -3.4880980 | 0.8384250  | H    | 3.5531840  | -2.0208760 | -1.8404450 |
| H    | -1.9832710 | -2.8360450 | 1.6287640  | H    | 3.9036310  | -1.2669710 | 1.0780570  |
| H    | -3.5524590 | -2.0214020 | 1.8405770  | H    | 1.9320880  | -3.4474560 | 1.7966230  |
| C    | -1.4957440 | -2.4599640 | -1.5859400 | H    | 1.3890880  | -1.9582130 | 2.5646530  |
| H    | -0.4901730 | -2.6414580 | -1.1663090 | H    | -1.9310990 | -3.4480800 | -1.7963310 |
| H    | 0.4909440  | -2.6413830 | 1.1663930  | H    | -3.9032990 | -1.2681170 | -1.0780390 |
| C    | 1.4964380  | -2.4595100 | 1.5860420  | C    | -2.9200560 | 2.5582500  | -1.1173560 |
| Si   | 2.5858750  | -1.4592990 | 0.3828220  | H    | -3.5526830 | 2.0212700  | -1.8409020 |
| N    | 1.7786490  | 0.0001720  | 0.0000210  | H    | -3.4393010 | 3.4876480  | -0.8382090 |
| Na   | 0.0000940  | 0.0000800  | -1.4644170 | H    | -1.9837370 | 2.8361820  | -1.6283720 |
| H    | -1.3885940 | -1.9588010 | -2.5646410 | C    | -1.4969980 | 2.4592900  | 1.5862460  |
| Si   | 2.5856360  | 1.4598130  | -0.3826160 | H    | -1.3897100 | 1.9578090  | 2.5647700  |
| C    | 2.9193270  | 2.5586770  | 1.1175030  | H    | -0.4914790 | 2.6414000  | 1.1667540  |
| H    | 3.5520910  | 2.0217380  | 1.8409600  | H    | -1.9328080 | 3.4471340  | 1.7969710  |
| H    | 3.4383340  | 3.4882550  | 0.8385170  | H    | -3.9040400 | 1.2667040  | 1.0773450  |

|   |           |           |            |
|---|-----------|-----------|------------|
| H | 1.9829370 | 2.8362900 | 1.6285660  |
| C | 1.4962320 | 2.4597690 | -1.5860850 |
| H | 1.3890890 | 1.9584460 | -2.5647040 |
| H | 0.4906580 | 2.6414740 | -1.1665470 |

**Table S38.** Geometric coordinates and single point energies for NaCPTMDS unsolvated dimer.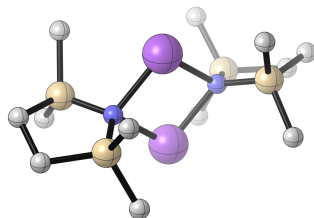

G = -2067.238754 Hartrees

G<sub>SP</sub> = -2068.420947 Hartrees

| Atom | X          | Y          | Z          | Atom | X          | Y          | Z          |
|------|------------|------------|------------|------|------------|------------|------------|
| Si   | -2.7385720 | -1.3576540 | -0.3787250 | H    | 5.3070200  | 1.3143980  | -0.2739980 |
| C    | -4.4905810 | -0.6075410 | -0.4811890 | H    | 4.6400600  | 0.2549510  | -1.5205110 |
| C    | -4.4905100 | 0.6055410  | 0.4837920  | C    | 2.2095270  | 2.1467870  | -2.0264530 |
| H    | -4.6400080 | 0.2552630  | 1.5205440  | H    | 2.2514350  | 1.4103550  | -2.8469770 |
| H    | -5.3068720 | 1.3147840  | 0.2740410  | H    | 1.1838590  | 2.5525920  | -1.9660950 |
| Si   | -2.7395320 | 1.3576650  | 0.3783870  | H    | 2.8593350  | 2.9877120  | -2.3129510 |
| N    | -1.7459200 | 0.0005440  | -0.0007930 | C    | 2.6644240  | 2.7319710  | 0.9222210  |
| Na   | -0.0005520 | 0.0009550  | 1.4681670  | H    | 1.6339290  | 3.1084990  | 1.0340630  |
| Na   | 0.0005540  | 0.0009370  | -1.4681000 | H    | 2.9951370  | 2.3510850  | 1.9015210  |
| N    | 1.7459210  | 0.0005840  | 0.0008500  | H    | 3.3033610  | 3.5894380  | 0.6604300  |
| Si   | 2.7396880  | 1.3575780  | -0.3783850 | C    | -2.6641110 | 2.7319950  | -0.9222800 |
| C    | 4.4905830  | 0.6052450  | -0.4837610 | H    | -3.3029490 | 3.5895480  | -0.6605270 |
| C    | 4.4905090  | -0.6078350 | 0.4812210  | H    | -1.6335740 | 3.1084030  | -1.0341400 |
| H    | 4.6421330  | -0.2577390 | 1.5177240  | H    | -2.9948700 | 2.3511060  | -1.9015630 |
| H    | 5.3056220  | -1.3181280 | 0.2701630  | C    | -2.2092600 | 2.1468920  | 2.0264120  |
| Si   | 2.7384180  | -1.3577410 | 0.3787310  | H    | -1.1835540 | 2.5525960  | 1.9660180  |
| C    | 2.6589560  | -2.7318940 | -0.9219310 | H    | -2.8589780 | 2.9878970  | 2.3128820  |
| H    | 3.2970080  | -3.5903980 | -0.6613870 | H    | -2.2512300 | 1.4105040  | 2.8469740  |
| H    | 1.6276850  | -3.1068510 | -1.0320040 | H    | -5.3057690 | -1.3177430 | -0.2701190 |
| H    | 2.9885680  | -2.3514150 | -1.9017690 | H    | -4.6421840 | -0.2574280 | -1.5176900 |
| C    | 2.2098670  | -2.1463520 | 2.0275320  | C    | -2.2101300 | -2.1462550 | -2.0275640 |



|   |            |            |            |
|---|------------|------------|------------|
| H | 1.1837200  | -2.5511590 | 1.9686860  |
| H | 2.8592790  | -2.9878960 | 2.3131170  |
| H | 2.2536000  | -1.4098540 | 2.8478780  |
| C | -2.6592770 | -2.7318670 | 0.9218800  |
| H | -3.2974310 | -3.5902830 | 0.6612930  |
| H | -1.6280510 | -3.1069480 | 1.0319450  |
| H | -2.9888510 | -2.3513910 | 1.9017320  |
| H | -1.1840260 | -2.5511710 | -1.9687490 |
| H | -2.8596390 | -2.9877130 | -2.3131800 |
| H | -2.2537920 | -1.4097120 | -2.8478750 |

**Table S39.** Geometric coordinates and single point energies for NaDPTMDS unsolvated dimer with phenyl rings pulled back away from sodium.

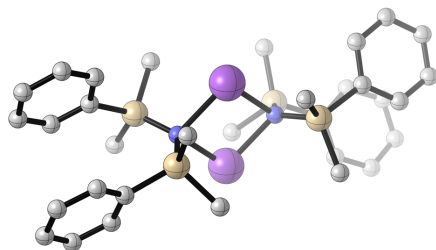

G = -2835.522747 Hartrees

G<sub>SP</sub> = -2837.509341 Hartrees

| Atom | X          | Y          | Z          | Atom | X         | Y          | Z          |
|------|------------|------------|------------|------|-----------|------------|------------|
| N    | 1.7830540  | 0.0000050  | -0.0000050 | C    | 5.6910080 | 0.3210040  | -2.8364510 |
| Na   | 0.0000580  | -0.0042530 | 1.4670460  | C    | 6.8410390 | 0.7466580  | -2.1705200 |
| N    | -1.7829270 | -0.0000040 | -0.0000030 | C    | 6.7248200 | 1.4382890  | -0.9658370 |
| Na   | 0.0000560  | 0.0042550  | -1.4670590 | C    | 5.4641870 | 1.6965120  | -0.4263590 |
| Si   | -2.5728780 | 1.4877650  | 0.3149660  | H    | 5.3978250 | 2.2213560  | 0.5303450  |
| C    | -1.5174670 | 2.4588900  | 1.5712630  | H    | 7.6207130 | 1.7675920  | -0.4360490 |
| H    | -1.4593560 | 1.9440340  | 2.5474570  | H    | 7.8263740 | 0.5394260  | -2.5919620 |
| H    | -0.4926880 | 2.6248990  | 1.1937310  | H    | 5.7744410 | -0.2170370 | -3.7828220 |
| H    | -1.9453340 | 3.4516880  | 1.7745220  | H    | 3.5445110 | 0.2377400  | -2.8221890 |
| C    | -2.7664040 | 2.6011930  | -1.2017010 | Si   | 2.5732370 | -1.4893860 | 0.3068840  |
| H    | -1.7922020 | 2.7985040  | -1.6776030 | C    | 2.7681330 | -2.5940040 | -1.2160640 |
| H    | -3.4175760 | 2.1258220  | -1.9512560 | H    | 3.4201390 | -2.1141630 | -1.9620090 |
| H    | -3.2067440 | 3.5750590  | -0.9367780 | H    | 3.2080870 | -3.5694830 | -0.9565140 |
| C    | -4.2945880 | 1.2671230  | 1.0783980  | H    | 1.7943630 | -2.7882810 | -1.6940930 |
| C    | -4.4369820 | 0.5739680  | 2.2911450  | C    | 1.5175050 | -2.4684460 | 1.5567090  |
| C    | -5.6923390 | 0.3066730  | 2.8363760  | H    | 1.4583990 | -1.9598330 | 2.5361120  |
| C    | -6.8418930 | 0.7360910  | 2.1720510  | H    | 0.4931170 | -2.6327680 | 1.1774130  |
| C    | -6.7248630 | 1.4338640  | 0.9709840  | H    | 1.9458840 | -3.4622250 | 1.7540210  |
| C    | -5.4638850 | 1.6946410  | 0.4335620  | C    | 4.2944030 | -1.2725740 | 1.0727140  |
| H    | -5.3968420 | 2.2244510  | -0.5203550 | C    | 4.4359670 | -0.5857480 | 2.2891680  |

|    |            |            |            |    |           |            |            |
|----|------------|------------|------------|----|-----------|------------|------------|
| H  | -7.6204070 | 1.7660130  | 0.4423830  | C  | 5.6909430 | -0.3209900 | 2.8364870  |
| H  | -7.8275090 | 0.5269160  | 2.5918800  | C  | 6.8409900 | -0.7466660 | 2.1705960  |
| H  | -5.7764260 | -0.2362330 | 3.7799060  | C  | 6.7247990 | -1.4383150 | 0.9659200  |
| H  | -3.5458370 | 0.2228740  | 2.8227620  | C  | 5.4641800 | -1.6965350 | 0.4264100  |
| Si | -2.5728780 | -1.4877680 | -0.3149950 | H  | 5.3978400 | -2.2213940 | -0.5302870 |
| C  | -1.5174890 | -2.4588540 | -1.5713410 | H  | 7.6207040 | -1.7676350 | 0.4361640  |
| H  | -1.4594150 | -1.9439750 | -2.5475250 | H  | 7.8263150 | -0.5394370 | 2.5920630  |
| H  | -0.4926960 | -2.6248580 | -1.1938440 | H  | 5.7743540 | 0.2170650  | 3.7828510  |
| H  | -1.9453480 | -3.4516540 | -1.7746100 | H  | 3.5444480 | -0.2377050 | 2.8221590  |
| C  | -2.7663690 | -2.6012280 | 1.2016520  | Si | 2.5732410 | 1.4893900  | -0.3069180 |
| H  | -3.4175260 | -2.1258700 | 1.9512290  | C  | 2.7680990 | 2.5940390  | 1.2160130  |
| H  | -3.2067150 | -3.5750890 | 0.9367200  | H  | 3.2080640 | 3.5695120  | 0.9564560  |
| H  | -1.7921590 | -2.7985470 | 1.6775330  | H  | 1.7943180 | 2.7883280  | 1.6940160  |
| C  | -4.2946050 | -1.2671230 | -1.0783880 | H  | 3.4200850 | 2.1142090  | 1.9619820  |
| C  | -5.4638880 | -1.6946230 | -0.4335160 | C  | 1.5175350 | 2.4684150  | -1.5567930 |
| C  | -6.7248790 | -1.4338450 | -0.9709080 | H  | 1.9459090 | 3.4621940  | -1.7541150 |
| C  | -6.8419360 | -0.7360870 | -2.1719810 | H  | 1.4584650 | 1.9597770  | -2.5361860 |
| C  | -5.6923960 | -0.3066870 | -2.8363420 | H  | 0.4931330 | 2.6327360  | -1.1775320 |
| C  | -4.4370260 | -0.5739830 | -2.2911410 | C  | 4.2944250 | 1.2725720  | -1.0727040 |
| H  | -3.5458930 | -0.2229040 | -2.8227870 | C  | 4.4360180 | 0.5857660  | -2.2891650 |
| H  | -5.7765040 | 0.2362070  | -3.7798770 |    |           |            |            |
| H  | -7.8275610 | -0.5269110 | -2.5917880 |    |           |            |            |
| H  | -7.6204110 | -1.7659810 | -0.4422790 |    |           |            |            |
| H  | -5.3968240 | -2.2244200 | 0.5204070  |    |           |            |            |

**Table S40.** Geometric coordinates and single point energies for NaDPTMDS unsolvated dimer with phenyl rings over sodium.

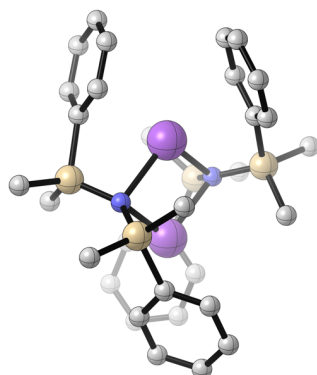

G = -2835.500531 Hartrees

G<sub>SP</sub> = -2837.529058 Hartrees

| Atom | X          | Y          | Z          | Atom | X          | Y          | Z          |
|------|------------|------------|------------|------|------------|------------|------------|
| Na   | -1.4989850 | 0.0007790  | -0.0009190 | C    | -2.2629700 | -1.8252280 | -1.8369280 |
| Si   | 0.5168100  | -2.5410350 | 1.4648630  | C    | -2.5926410 | -1.1419050 | -3.0177170 |
| N    | -0.0004450 | -1.8447720 | -0.0000140 | C    | -3.8609360 | -0.5875280 | -3.2124790 |
| Si   | -0.5186920 | -2.5417400 | -1.4642130 | C    | -4.8375360 | -0.7133200 | -2.2259280 |
| C    | -0.7310740 | -4.4174370 | -1.5153020 | C    | -4.5413760 | -1.3959140 | -1.0443920 |
| H    | -1.1196760 | -4.7140400 | -2.5018450 | C    | -3.2696810 | -1.9392010 | -0.8575990 |
| H    | 0.2202830  | -4.9438730 | -1.3487120 | H    | -3.0483260 | -2.4613540 | 0.0809030  |
| H    | -1.4479230 | -4.7614100 | -0.7545100 | H    | -5.2988960 | -1.4995060 | -0.2651880 |
| C    | 0.5805350  | -2.0490710 | -2.9219020 | H    | -5.8284890 | -0.2812900 | -2.3767790 |
| H    | 1.6023040  | -2.4279960 | -2.7569420 | H    | -4.0854740 | -0.0539230 | -4.1378680 |
| Na   | 1.4992050  | -0.0007340 | -0.0010080 | H    | -1.8430370 | -1.0333910 | -3.8061800 |
| N    | 0.0007010  | 1.8448400  | -0.0007800 | C    | 0.7288730  | -4.4167840 | 1.5167640  |
| Si   | 0.5187750  | 2.5412710  | -1.4652970 | H    | 1.4452280  | -4.7613800 | 0.7558020  |
| C    | 0.7314180  | 4.4169210  | -1.5169600 | H    | 1.1178850  | -4.7129520 | 2.5032800  |
| H    | 1.4482030  | 4.7610790  | -0.7561960 | H    | -0.2227250 | -4.9430770 | 1.3509880  |
| H    | 1.1201510  | 4.7131780  | -2.5035550 | C    | -0.5827440 | -2.0479460 | 2.9221160  |
| H    | -0.2199230 | 4.9434740  | -1.3506280 | H    | -0.6523200 | -0.9522610 | 3.0167450  |

|    |            |            |            |   |            |            |            |
|----|------------|------------|------------|---|------------|------------|------------|
| C  | -0.5806730 | 2.0484120  | -2.9227530 | H | -1.6047830 | -2.4257530 | 2.7562730  |
| H  | -0.6514760 | 0.9527260  | -3.0164380 | H | -0.2276920 | -2.4528640 | 3.8825770  |
| H  | -1.6023540 | 2.4275740  | -2.7577990 | C | 2.2612340  | -1.8249670 | 1.8378480  |
| H  | -0.2247290 | 2.4519870  | -3.8834560 | C | 2.5907220  | -1.1414100 | 3.0185450  |
| C  | 2.2629190  | 1.8243470  | -1.8378830 | C | 3.8591910  | -0.5875780 | 3.2136860  |
| C  | 2.5924530  | 1.1406920  | -3.0185140 | C | 4.8361470  | -0.7141160 | 2.2275790  |
| C  | 3.8605600  | 0.5858170  | -3.2130760 | C | 4.5401860  | -1.3969730 | 1.0461510  |
| C  | 4.8370990  | 0.7113800  | -2.2264370 | C | 3.2683240  | -1.9397530 | 0.8589980  |
| C  | 4.5410760  | 1.3942680  | -1.0450360 | H | 3.0471540  | -2.4622420 | -0.0793720 |
| C  | 3.2695730  | 1.9380780  | -0.8584580 | H | 5.2980010  | -1.5011920 | 0.2673160  |
| H  | 3.0483110  | 2.4604330  | 0.0799530  | H | 5.8272200  | -0.2824530 | 2.3786960  |
| H  | 5.2985500  | 1.4976570  | -0.2657590 | H | 4.0835900  | -0.0537770 | 4.1389930  |
| H  | 5.8278960  | 0.2789290  | -2.3771150 | H | 1.8408090  | -1.0322850 | 3.8066370  |
| H  | 4.0849960  | 0.0519890  | -4.1383600 | C | -2.2611540 | 1.8258630  | 1.8370010  |
| H  | 1.8428770  | 1.0323330  | -3.8070270 | C | -2.5907910 | 1.1429300  | 3.0180250  |
| Si | -0.5166780 | 2.5416420  | 1.4638000  | C | -3.8593860 | 0.5894750  | 3.2134080  |
| C  | -0.7285490 | 4.4174380  | 1.5150490  | C | -4.8363230 | 0.7157950  | 2.2272490  |
| H  | -1.1174460 | 4.7140110  | 2.5014900  | C | -4.5401900 | 1.3979950  | 1.0454870  |
| H  | 0.2230430  | 4.9436340  | 1.3489710  | C | -3.2681850 | 1.9403500  | 0.8580680  |
| H  | -1.4449810 | 4.7617680  | 0.7540340  | H | -3.0468690 | 2.4622760  | -0.0805810 |
| C  | 0.5827550  | 2.0488560  | 2.9212510  | H | -5.2979860 | 1.5020630  | 0.2666170  |
| H  | 1.6048030  | 2.4266140  | 2.7553440  | H | -5.8275080 | 0.2844680  | 2.3785830  |
| H  | 0.2277040  | 2.4539610  | 3.8816310  | H | -4.0839130 | 0.0561580  | 4.1389650  |
| H  | 0.6523360  | 0.9531900  | 3.0160920  | H | -1.8409300 | 1.0340330  | 3.8061950  |
| H  | 0.2245970  | -2.4529300 | -3.8824880 |   |            |            |            |
| H  | 0.6511330  | -0.9533980 | -3.0158440 |   |            |            |            |

**Table S41.** Geometric coordinates and single point energies for NaHMDS unsolvated trimer.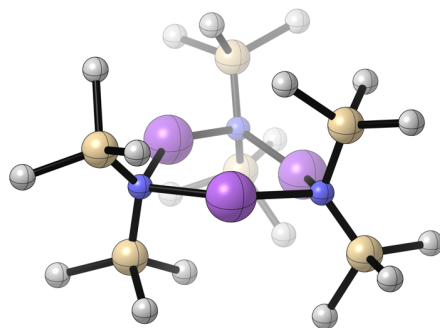

G = -3104.42812 Hartrees

G<sub>SP</sub> = -3106.215009 Hartrees

| Atom | X          | Y          | Z          | Atom | X          | Y          | Z          |
|------|------------|------------|------------|------|------------|------------|------------|
| Na   | 0.4298660  | 1.8070580  | 0.2686480  | H    | -0.8259350 | 0.7977680  | -3.6343250 |
| Na   | 1.2877420  | -1.2947880 | -0.4529550 | H    | 0.2849700  | 1.4716900  | -2.4315090 |
| Na   | -2.2012700 | -0.5163530 | 0.2575060  | H    | -0.5683190 | -0.0614760 | -2.1068110 |
| N    | -0.7664070 | -2.2921050 | 0.0737470  | N    | 2.4334230  | 0.6680560  | -0.0363170 |
| Si   | -0.4705920 | -2.6946560 | 1.7180260  | Si   | 3.3157620  | 0.7897580  | -1.5102850 |
| C    | -1.1045220 | -4.3752330 | 2.3059140  | C    | 5.1756730  | 0.4614580  | -1.3602660 |
| H    | -0.6855700 | -5.2043360 | 1.7153330  | H    | 5.6587630  | 0.5457530  | -2.3463640 |
| H    | -0.8285590 | -4.5401490 | 3.3590470  | H    | 5.6748110  | 1.1726650  | -0.6845340 |
| H    | -2.2013840 | -4.4302040 | 2.2320860  | H    | 5.3655330  | -0.5536660 | -0.9779430 |
| C    | 1.3924000  | -2.6406600 | 2.1002170  | C    | 2.7013520  | -0.5411910 | -2.7342770 |
| H    | 1.6058640  | -2.9186060 | 3.1436250  | H    | 3.2140600  | -0.4297420 | -3.7017690 |
| H    | 1.9423940  | -3.3486590 | 1.4559930  | H    | 2.9431140  | -1.5620220 | -2.3843410 |
| H    | 1.8221860  | -1.6353950 | 1.9535320  | H    | 1.6215300  | -0.4779470 | -2.9455930 |
| C    | -1.3038530 | -1.4069860 | 2.8468860  | C    | 3.1311670  | 2.4793140  | -2.3470010 |
| H    | -1.0872120 | -0.3632050 | 2.5559130  | H    | 3.5581420  | 3.2589340  | -1.6962500 |
| H    | -2.3988910 | -1.5457470 | 2.8516170  | H    | 3.6624580  | 2.5187610  | -3.3104760 |
| H    | -0.9703450 | -1.5135050 | 3.8905920  | H    | 2.0790630  | 2.7445060  | -2.5372720 |
| Si   | -1.0231960 | -3.4641000 | -1.1625030 | Si   | 3.1526740  | 1.0957830  | 1.4693660  |
| C    | -1.1465540 | -2.6384370 | -2.8630400 | C    | 1.7703320  | 1.2591180  | 2.7740560  |

|    |            |            |            |   |            |            |            |
|----|------------|------------|------------|---|------------|------------|------------|
| H  | -1.9541240 | -1.8901410 | -2.9091950 | H | 1.0712980  | 0.4063300  | 2.7607960  |
| H  | -0.2109020 | -2.1342360 | -3.1553370 | H | 2.2013400  | 1.3039670  | 3.7860150  |
| H  | -1.3570420 | -3.3997850 | -3.6305050 | H | 1.1836320  | 2.1886930  | 2.6636990  |
| C  | -2.6108020 | -4.4709970 | -0.9485290 | C | 4.4244790  | -0.1329380 | 2.1372160  |
| H  | -2.7726260 | -5.1398520 | -1.8080450 | H | 5.2937780  | -0.1882450 | 1.4652270  |
| H  | -2.5837880 | -5.0894920 | -0.0398100 | H | 4.7856470  | 0.1827390  | 3.1285260  |
| H  | -3.4850880 | -3.8037820 | -0.8751860 | H | 4.0102080  | -1.1475290 | 2.2348430  |
| C  | 0.4283970  | -4.6845200 | -1.2921810 | C | 3.9886340  | 2.7993030  | 1.4412280  |
| H  | 0.5806510  | -5.2385440 | -0.3525790 | H | 3.2767030  | 3.5797080  | 1.1253070  |
| H  | 0.2684820  | -5.4222470 | -2.0936990 | H | 4.3662140  | 3.0754850  | 2.4382200  |
| H  | 1.3719810  | -4.1587960 | -1.5216930 | H | 4.8390560  | 2.8296480  | 0.7428550  |
| N  | -1.8292810 | 1.7764300  | -0.0283130 | H | -2.1820940 | 3.5522680  | -3.5632490 |
| Si | -2.8234990 | 2.4758520  | 1.1842560  | H | -3.0434780 | 4.1655580  | -2.1316490 |
| C  | -1.7884850 | 2.9794270  | 2.6859040  | H | -1.2664580 | 4.1779110  | -2.1703970 |
| H  | -1.0443540 | 3.7466770  | 2.4133660  | C | -3.7063600 | 0.9806940  | -2.2428900 |
| H  | -2.4154590 | 3.4025740  | 3.4857810  | H | -4.5851640 | 1.4593730  | -1.7814300 |
| H  | -1.2506060 | 2.1169280  | 3.1121330  | H | -3.8450120 | 1.0117140  | -3.3347490 |
| C  | -4.0997630 | 1.2017050  | 1.8094280  | H | -3.7238500 | -0.0860350 | -1.9548810 |
| H  | -4.8183360 | 1.6562550  | 2.5086240  | C | -0.6746500 | 0.9421910  | -2.5533200 |
| H  | -4.6860690 | 0.7850710  | 0.9718280  |   |            |            |            |
| H  | -3.6218650 | 0.3712760  | 2.3565250  |   |            |            |            |
| C  | -3.8141990 | 3.9896420  | 0.6346970  |   |            |            |            |
| H  | -4.5106990 | 3.7405050  | -0.1817530 |   |            |            |            |
| H  | -4.4087850 | 4.3889170  | 1.4709570  |   |            |            |            |
| H  | -3.1497340 | 4.7910570  | 0.2769110  |   |            |            |            |
| Si | -2.1060430 | 1.8680610  | -1.7195940 |   |            |            |            |
| C  | -2.1591640 | 3.6029560  | -2.4634960 |   |            |            |            |

**Table S42.** Geometric coordinates and single point energies for  $(\text{SiMe}_3)_2\text{-N-Na-N}(\text{SiMe}_3)_2$  anion piece of triple ion.

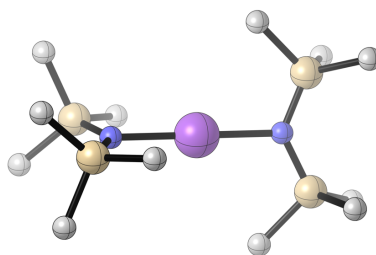

G = -1907.397903 Hartrees

G<sub>SP</sub> = -1908.549853 Hartrees

| Atom | X          | Y          | Z          | Atom | X          | Y          | Z          |
|------|------------|------------|------------|------|------------|------------|------------|
| Si   | 2.9412810  | -1.2641930 | -0.8686230 | H    | -2.9546240 | -3.0429690 | -0.8978080 |
| N    | 2.2374350  | -0.0001890 | 0.0001610  | H    | -4.1270800 | -3.4536450 | 0.3856720  |
| Si   | 2.9399640  | 1.2645550  | 0.8689470  | H    | -4.5239930 | -2.2139500 | -0.8355620 |
| C    | 4.3192330  | 0.7359710  | 2.0734250  | C    | -1.6140950 | -2.1339050 | 1.9231340  |
| H    | 3.9546440  | -0.0466140 | 2.7573820  | H    | -1.1490730 | -1.4235630 | 2.6266000  |
| H    | 5.1738650  | 0.3177680  | 1.5160890  | H    | -2.0301580 | -2.9666450 | 2.5122780  |
| H    | 4.6909260  | 1.5801180  | 2.6768790  | H    | -0.8128190 | -2.5516540 | 1.2893770  |
| C    | 1.6125690  | 2.1342280  | 1.9221380  | Si   | -2.9404850 | 1.2641310  | -0.8691420 |
| H    | 2.0278750  | 2.9675440  | 2.5109980  | C    | -4.3226400 | 0.7358040  | -2.0704280 |
| H    | 0.8114030  | 2.5511060  | 1.2876730  | H    | -3.9598380 | -0.0469700 | -2.7551190 |
| H    | 1.1475630  | 1.4240580  | 2.6257950  | H    | -5.1760000 | 0.3178490  | -1.5109530 |
| C    | 3.7121260  | 2.6269760  | -0.2157450 | H    | -4.6955890 | 1.5799320  | -2.6731260 |
| H    | 4.5238120  | 2.2134460  | -0.8352910 | C    | -1.6145300 | 2.1321560  | -1.9254750 |
| H    | 2.9540020  | 3.0415110  | -0.8990860 | H    | -2.0304270 | 2.9654210  | -2.5139930 |
| H    | 4.1255190  | 3.4539050  | 0.3847070  | H    | -0.8118320 | 2.5488680  | -1.2928330 |
| Na   | 0.0000200  | -0.0012530 | -0.0005350 | H    | -1.1513950 | 1.4212200  | -2.6295770 |
| N    | -2.2374390 | -0.0006620 | -0.0008910 | C    | -3.7093400 | 2.6278020  | 0.2163290  |
| Si   | -2.9406360 | -1.2644470 | 0.8686930  | H    | -4.5200630 | 2.2152010  | 0.8377610  |
| C    | -4.3202740 | -0.7341790 | 2.0720150  | H    | -2.9494890 | 3.0420760  | 0.8979130  |
| H    | -5.1739850 | -0.3154310 | 1.5136640  | H    | -4.1233270 | 3.4547780  | -0.3836520 |



|   |            |            |            |
|---|------------|------------|------------|
| H | -4.6933250 | -1.5776310 | 2.6755980  |
| H | -3.9555320 | 0.0484350  | 2.7558570  |
| C | -3.7128840 | -2.6274350 | -0.2152220 |
| H | 1.1486300  | -1.4259880 | -2.6251230 |
| H | 2.0309140  | -2.9683270 | -2.5104330 |
| H | 0.8142190  | -2.5533970 | -1.2868490 |
| H | 3.9543320  | 0.0479900  | -2.7573120 |
| C | 3.7151780  | -2.6257070 | 0.2159740  |
| H | 2.9576460  | -3.0411100 | 0.8994440  |
| H | 4.1293770  | -3.4521640 | -0.3845780 |
| H | 4.5265210  | -2.2112910 | 0.8353720  |
| C | 1.6147020  | -2.1355070 | -1.9215090 |
| C | 4.3197910  | -0.7341690 | -2.0733380 |
| H | 5.1740040  | -0.3150310 | -1.5160570 |
| H | 4.6923590  | -1.5779550 | -2.6767570 |

**Table S43.** Geometric coordinates and single point energies for (SiMe<sub>3</sub>)<sub>2</sub>N anion piece of separated ion pair.

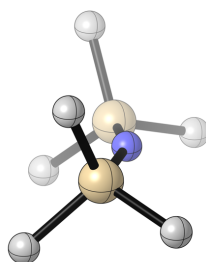

G = -872.551192 Hartrees

G<sub>SP</sub> = -873.1101533 Hartrees

| Atom | X          | Y          | Z          | Atom | X          | Y          | Z          |
|------|------------|------------|------------|------|------------|------------|------------|
| Si   | -1.6059210 | 0.0133710  | 0.0725470  | C    | -2.0651380 | -1.0629820 | -1.4469740 |
| N    | 0.0000000  | 0.0807800  | 0.4430140  | H    | -1.5766780 | -0.6709100 | -2.3542010 |
| Si   | 1.6059140  | 0.0133600  | 0.0725510  | H    | -1.7081740 | -2.0957880 | -1.3025990 |
| C    | 2.0649960  | -1.0616790 | -1.4479440 | H    | -3.1529610 | -1.0958170 | -1.6292310 |
| H    | 1.7075810  | -2.0944870 | -1.3047190 | H    | -3.7487310 | -0.7125510 | 1.2445420  |
| H    | 1.5768870  | -0.6684620 | -2.3548680 | H    | -2.3569730 | -1.7250210 | 1.7280120  |
| H    | 3.1528410  | -1.0947530 | -1.6300200 | C    | -2.4092280 | 1.7122440  | -0.3002140 |
| C    | 2.4095610  | 1.7124070  | -0.2986540 | H    | -3.4916120 | 1.6352460  | -0.5000410 |
| H    | 2.2633060  | 2.3929140  | 0.5557570  | H    | -2.2628660 | 2.3935110  | 0.5535720  |
| H    | 3.4919380  | 1.6353660  | -0.4985040 | H    | -1.9287300 | 2.1770350  | -1.1766570 |
| H    | 1.9291920  | 2.1781060  | -1.1746840 |      |            |            |            |
| C    | 2.6735310  | -0.6978050 | 1.4910440  |      |            |            |            |
| H    | 3.7485460  | -0.7140150 | 1.2439530  |      |            |            |            |
| H    | 2.5370910  | -0.0953990 | 2.4036520  |      |            |            |            |
| H    | 2.3565740  | -1.7266390 | 1.7264860  |      |            |            |            |
| C    | -2.6737180 | -0.6963360 | 1.4916370  |      |            |            |            |
| H    | -2.5371700 | -0.0931340 | 2.4037030  |      |            |            |            |

**Table S44.** Geometric coordinates and single point energies for NaHMDS monosolvated toluene dimer.

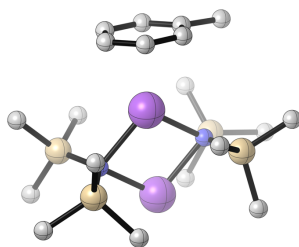

G = -2340.744069 Hartrees

G<sub>SP</sub> = -2342.234312 Hartrees

| Atom | X          | Y          | Z          | Atom | X          | Y          | Z         |
|------|------------|------------|------------|------|------------|------------|-----------|
| N    | 1.9579580  | -0.5249370 | 0.1468370  | C    | -2.3207430 | 0.5610400  | 2.7898360 |
| Na   | 0.0485390  | 0.8123480  | -0.2225590 | H    | -2.9797510 | 1.3549480  | 2.4072830 |
| Na   | 0.2657820  | -2.0458630 | 0.4237650  | H    | -2.6582910 | 0.3103160  | 3.8078570 |
| N    | -1.6631250 | -0.7132320 | 0.1365080  | H    | -1.3016950 | 0.9684390  | 2.8669850 |
| Si   | -2.2844200 | -1.2090420 | -1.3778500 | C    | -4.1881510 | -1.5303060 | 1.6419350 |
| C    | -4.0496690 | -0.6685000 | -1.7975330 | H    | -4.5388090 | -1.7541960 | 2.6614990 |
| H    | -4.2986210 | -0.9572920 | -2.8310300 | H    | -4.8393220 | -0.7437780 | 1.2297090 |
| H    | -4.7927970 | -1.1298180 | -1.1311570 | H    | -4.3271220 | -2.4355170 | 1.0299020 |
| H    | -4.1567580 | 0.4248710  | -1.7199080 | Si   | 2.7605790  | 0.1361620  | 1.5103160 |
| C    | -1.1970450 | -0.5024240 | -2.7696860 | C    | 1.4781170  | 0.7927990  | 2.7481430 |
| H    | -1.4053620 | 0.5672870  | -2.9248680 | H    | 0.8506690  | 1.5949470  | 2.3260330 |
| H    | -0.1191830 | -0.6073150 | -2.5654630 | H    | 0.8041320  | -0.0094520 | 3.0898190 |
| H    | -1.3923230 | -1.0137640 | -3.7251730 | H    | 1.9727550  | 1.2074130  | 3.6404660 |
| C    | -2.2521660 | -3.1054580 | -1.5722730 | C    | 3.8971920  | 1.5978530  | 1.0908400 |
| H    | -1.2334630 | -3.5243680 | -1.4910280 | H    | 4.3619820  | 2.0253630  | 1.9930960 |
| H    | -2.8677160 | -3.5807250 | -0.7912140 | H    | 4.7070060  | 1.2930970  | 0.4096590 |
| H    | -2.6472130 | -3.4262170 | -2.5489010 | H    | 3.3298420  | 2.3974130  | 0.5884270 |
| Si   | -2.3815520 | -0.9621680 | 1.6685400  | C    | 3.7975730  | -1.1186530 | 2.4802820 |
| C    | -1.4281370 | -2.3364630 | 2.6101320  | H    | 4.6321480  | -1.5039730 | 1.8761240 |
| H    | -1.4332600 | -3.2854130 | 2.0429640  | H    | 4.2203600  | -0.6681720 | 3.3920100 |

|   |            |            |            |    |           |            |            |
|---|------------|------------|------------|----|-----------|------------|------------|
| H | -0.3820690 | -2.0599620 | 2.8377910  | H  | 3.1798060 | -1.9788090 | 2.7860190  |
| H | -1.8971460 | -2.5537900 | 3.5817680  | Si | 2.7732990 | -1.0642600 | -1.2608330 |
| C | 1.9003490  | -2.6273260 | -1.9276770 | H  | 1.9937800 | -3.4545070 | -1.2003080 |
| H | 3.3441230  | 1.1250730  | -2.2878850 | H  | 2.3714460 | -2.9804250 | -2.8578280 |
| C | 4.5751950  | -1.5995740 | -1.0206280 | H  | 0.8323930 | -2.4792780 | -2.1586050 |
| H | 5.1955950  | -0.7913160 | -0.6036370 | C  | 2.7818850 | 0.2428780  | -2.6357390 |
| H | 4.6429600  | -2.4605030 | -0.3376880 | H  | 3.2612280 | -0.1226530 | -3.5571510 |
| H | 5.0184830  | -1.8974660 | -1.9838020 | H  | 1.7647300 | 0.5767150  | -2.8973340 |
| C | 0.0212060  | 3.1466120  | -1.9608400 |    |           |            |            |
| C | 0.9434060  | 3.4387460  | -0.9521260 |    |           |            |            |
| C | 0.4988510  | 3.5618110  | 0.3666770  |    |           |            |            |
| C | -0.8516640 | 3.3727370  | 0.6762020  |    |           |            |            |
| C | -1.7860240 | 3.0687050  | -0.3249550 |    |           |            |            |
| C | -1.3278890 | 2.9713530  | -1.6469370 |    |           |            |            |
| H | -2.0447540 | 2.7498260  | -2.4408080 |    |           |            |            |
| C | -3.2290600 | 2.8023380  | 0.0022560  |    |           |            |            |
| H | -3.8888430 | 3.1399080  | -0.8083850 |    |           |            |            |
| H | -3.3768250 | 1.7173950  | 0.1316390  |    |           |            |            |
| H | -3.5295570 | 3.3021070  | 0.9324280  |    |           |            |            |
| H | -1.1873780 | 3.4575020  | 1.7124070  |    |           |            |            |
| H | 1.2094900  | 3.7969460  | 1.1611410  |    |           |            |            |
| H | 1.9985320  | 3.5731360  | -1.1938140 |    |           |            |            |
| H | 0.3553820  | 3.0531620  | -2.9956020 |    |           |            |            |

**Table S45** Geometric coordinates and single point energies for NaHMDS disolvated toluene dimer.

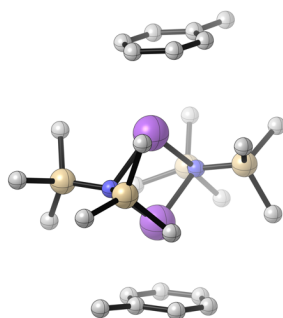

G = -2611.872211 Hartrees

G<sub>SP</sub> = -2613.659114 Hartrees

| Atom | X          | Y          | Z          | Atom | X          | Y          | Z          |
|------|------------|------------|------------|------|------------|------------|------------|
| Na   | -1.4351020 | -0.6963370 | -0.0543420 | C    | 2.8795240  | -1.9743060 | -2.0942660 |
| N    | 0.8002690  | -1.3637770 | 0.0182030  | H    | 3.5735890  | -2.4879860 | -1.4113140 |
| Na   | 1.0694810  | 0.9456540  | 0.0465920  | H    | 3.0071390  | -2.4062510 | -3.0992410 |
| N    | -1.2183480 | 1.6297270  | -0.0167260 | H    | 3.1666210  | -0.9111420 | -2.1359790 |
| Si   | -1.5592850 | 2.1876220  | 1.5613930  | Si   | 1.3416040  | -2.0033040 | 1.5153920  |
| C    | -2.8997210 | 3.5138960  | 1.7524040  | C    | 1.4591970  | -0.6341540 | 2.8271990  |
| H    | -3.1240000 | 3.6526520  | 2.8222580  | H    | 2.2256100  | 0.1127780  | 2.5647430  |
| H    | -2.5862730 | 4.4860740  | 1.3460550  | H    | 1.7435860  | -1.0585160 | 3.8030380  |
| H    | -3.8359390 | 3.2249930  | 1.2492730  | H    | 0.5023000  | -0.1077520 | 2.9673240  |
| C    | -2.1694020 | 0.7526340  | 2.6558040  | C    | 0.1513860  | -3.2953950 | 2.2326820  |
| H    | -3.2333290 | 0.5640420  | 2.4434340  | H    | 0.5434190  | -3.7514820 | 3.1552250  |
| H    | -1.6232110 | -0.1957280 | 2.5134680  | H    | -0.8155690 | -2.8247650 | 2.4765890  |
| H    | -2.0894930 | 1.0082200  | 3.7242610  | H    | -0.0404410 | -4.0989710 | 1.5039800  |
| C    | -0.0120860 | 2.9147660  | 2.4003430  | C    | 3.0670480  | -2.7894440 | 1.4436720  |
| H    | 0.7938090  | 2.1705820  | 2.5103180  | H    | 3.0951560  | -3.6632290 | 0.7736910  |
| H    | 0.3737860  | 3.7573610  | 1.8020980  | H    | 3.7974950  | -2.0558370 | 1.0654290  |
| H    | -0.2346090 | 3.2948340  | 3.4097760  | H    | 3.3974110  | -3.1202930 | 2.4408070  |
| Si   | -1.4082020 | 2.4382580  | -1.5110870 | C    | -3.3716840 | -3.0272880 | 1.0861540  |

|   |            |            |            |    |            |            |            |
|---|------------|------------|------------|----|------------|------------|------------|
| C | 0.2777220  | 2.6526970  | -2.3784100 | C  | -2.9338910 | -3.5519780 | -0.1302530 |
| H | 0.8891320  | 3.3732310  | -1.8103020 | C  | -3.1706460 | -2.8407560 | -1.3079720 |
| H | 0.8544190  | 1.7162740  | -2.4775190 | C  | -3.8228440 | -1.6052230 | -1.2658110 |
| H | 0.1560210  | 3.0576090  | -3.3952340 | C  | -4.2522760 | -1.0565260 | -0.0467530 |
| C | -2.5194000 | 1.4888560  | -2.7207870 | C  | -4.0267260 | -1.7956930 | 1.1240660  |
| H | -3.5465060 | 1.4229640  | -2.3281110 | H  | -4.3710870 | -1.3996260 | 2.0811320  |
| H | -2.5665640 | 1.9993880  | -3.6955270 | C  | -4.8950710 | 0.3041040  | 0.0058930  |
| H | -2.1515710 | 0.4668310  | -2.9010480 | H  | -5.4990570 | 0.4248800  | 0.9150540  |
| C | -2.1145990 | 4.1943640  | -1.4336430 | H  | -4.1172330 | 1.0870610  | 0.0079390  |
| H | -2.1366840 | 4.6326280  | -2.4440260 | H  | -5.5379450 | 0.4754170  | -0.8682280 |
| H | -3.1407590 | 4.2076370  | -1.0370520 | H  | -4.0025670 | -1.0550330 | -2.1921020 |
| H | -1.4988690 | 4.8489210  | -0.7964140 | H  | -2.8470180 | -3.2508860 | -2.2663290 |
| C | 3.5251640  | 2.1882260  | 1.2586670  | H  | -2.4219570 | -4.5145560 | -0.1597890 |
| C | 4.3892190  | 1.0934810  | 1.1565950  | H  | -3.2039060 | -3.5812330 | 2.0107960  |
| C | 4.8744280  | 0.6709520  | -0.0847370 | Si | 1.0981450  | -2.1569140 | -1.4725590 |
| C | 4.4591690  | 1.3674030  | -1.2303630 | C  | -0.0098300 | -1.4129440 | -2.8253990 |
| C | 3.5935540  | 2.4539780  | -1.1387960 | H  | -1.0791560 | -1.6039040 | -2.6352840 |
| C | 3.1222970  | 2.8727920  | 0.1112010  | H  | 0.1235030  | -0.3227650 | -2.9117720 |
| H | 2.4569450  | 3.7353200  | 0.1904510  | H  | 0.2217360  | -1.8516170 | -3.8085170 |
| H | 3.2874260  | 2.9822890  | -2.0429030 | C  | 0.7283350  | -4.0188600 | -1.4570230 |
| H | 4.8286290  | 1.0517070  | -2.2089490 | H  | 0.9170480  | -4.4720440 | -2.4429450 |
| C | 5.8299920  | -0.4848420 | -0.2053540 | H  | 1.3517910  | -4.5486790 | -0.7195460 |
| H | 6.7834870  | -0.1541420 | -0.6430710 | H  | -0.3249370 | -4.2018000 | -1.1934930 |
| H | 6.0391390  | -0.9365070 | 0.7726620  |    |            |            |            |
| H | 5.4147310  | -1.2613260 | -0.8639590 |    |            |            |            |
| H | 4.6975410  | 0.5620510  | 2.0599440  |    |            |            |            |
| H | 3.1707840  | 2.5124780  | 2.2392020  |    |            |            |            |

**Table S46.** Geometric coordinates and single point energies for NaHMDS disolvated benzene dimer.

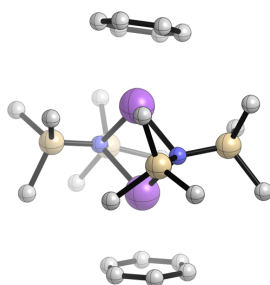

G = -2533.391992 Hartrees

G<sub>SP</sub> = -2535.091764 Hartrees

| Atom | X          | Y          | Z          | Atom | X          | Y          | Z          |
|------|------------|------------|------------|------|------------|------------|------------|
| Na   | 0.3573950  | 1.4165280  | 0.0562670  | H    | -4.1487450 | 2.7388850  | -0.3776600 |
| Na   | -0.4239510 | -1.4052120 | -0.1060170 | H    | -2.6240140 | 3.4414430  | -0.9469860 |
| N    | 1.7270020  | -0.4632380 | 0.0492570  | C    | -0.0770710 | -4.1216880 | -1.0679710 |
| Si   | 2.5961400  | -1.0210050 | -1.3197840 | C    | 0.0741880  | -4.1854820 | 0.3199880  |
| C    | 1.4406920  | -1.2510360 | -2.8102910 | C    | -1.0227030 | -3.9445750 | 1.1529720  |
| H    | 0.5673510  | -1.8942690 | -2.6145440 | C    | -2.2685100 | -3.6402490 | 0.5977160  |
| H    | 1.0622130  | -0.2753120 | -3.1520870 | C    | -2.4193580 | -3.5745930 | -0.7893060 |
| H    | 1.9912700  | -1.7029850 | -3.6506440 | C    | -1.3232360 | -3.8133700 | -1.6222220 |
| C    | 3.4716570  | -2.6843970 | -1.0280580 | H    | -1.4391830 | -3.7566840 | -2.7060220 |
| H    | 3.9379150  | -3.0632370 | -1.9512030 | H    | -3.3922060 | -3.3334770 | -1.2186460 |
| H    | 4.2661480  | -2.5857750 | -0.2711320 | H    | -3.1249590 | -3.4480670 | 1.2456250  |
| H    | 2.7677210  | -3.4480390 | -0.6616080 | H    | -0.9032650 | -3.9857900 | 2.2371000  |
| C    | 3.9333850  | 0.1619400  | -1.9672250 | H    | 1.0486710  | -4.4123570 | 0.7552710  |
| H    | 4.6323290  | 0.4664580  | -1.1737830 | H    | 0.7813250  | -4.3003000 | -1.7179720 |
| H    | 4.5180400  | -0.3135550 | -2.7707020 | C    | 0.9980650  | 4.2592470  | 0.8883760  |
| H    | 3.4714820  | 1.0690570  | -2.3880690 | C    | 2.2633230  | 3.7693660  | 0.5534300  |
| Si   | 2.4398940  | -0.4505830 | 1.6102420  | C    | 2.5201390  | 3.3205030  | -0.7434530 |
| C    | 1.5896300  | 0.8381740  | 2.7241250  | C    | 1.5132640  | 3.3747180  | -1.7119690 |
| H    | 1.8110870  | 1.8638260  | 2.3871700  | C    | 0.2499970  | 3.8749990  | -1.3812200 |

|    |            |            |           |    |            |            |            |
|----|------------|------------|-----------|----|------------|------------|------------|
| H  | 1.9648030  | 0.7559690  | 3.7562160 | C  | -0.0092610 | 4.3113760  | -0.0782670 |
| H  | 0.4965560  | 0.7200860  | 2.7731820 | H  | -0.9980720 | 4.6896120  | 0.1856830  |
| C  | 2.3001960  | -2.1186170 | 2.5069810 | H  | -0.5384770 | 3.9137720  | -2.1350600 |
| H  | 2.7371400  | -2.0767900 | 3.5169850 | H  | 1.7124030  | 3.0218320  | -2.7259220 |
| H  | 1.2481760  | -2.4316630 | 2.6105280 | H  | 3.5016150  | 2.9186680  | -0.9973400 |
| H  | 2.8311260  | -2.8996520 | 1.9396280 | H  | 3.0503440  | 3.7262040  | 1.3080630  |
| C  | 4.2767500  | 0.0271180  | 1.6457560 | H  | 0.7932210  | 4.5960170  | 1.9060270  |
| H  | 4.9000110  | -0.6695260 | 1.0637950 | H  | -2.4782050 | 2.3153670  | 3.4391520  |
| H  | 4.4225630  | 1.0350270  | 1.2243190 | Si | -2.6658960 | 0.9545600  | -1.3476940 |
| H  | 4.6584010  | 0.0343220  | 2.6788520 | C  | -1.5351190 | 0.9574570  | -2.8733180 |
| N  | -1.7930030 | 0.4490120  | 0.0384360 | H  | -2.0423650 | 1.4163230  | -3.7367580 |
| Si | -2.4451280 | 0.5552260  | 1.6204650 | H  | -0.5893380 | 1.5015220  | -2.7159000 |
| C  | -4.3206120 | 0.3073800  | 1.7560400 | H  | -1.2747130 | -0.0749480 | -3.1569410 |
| H  | -4.6416570 | 0.3736910  | 2.8077040 | C  | -4.1073210 | -0.1789450 | -1.8325130 |
| H  | -4.8851540 | 1.0609400  | 1.1853520 | H  | -4.8413010 | -0.2791780 | -1.0193990 |
| H  | -4.6092900 | -0.6859240 | 1.3769600 | H  | -4.6326200 | 0.2076260  | -2.7201880 |
| C  | -1.7071950 | -0.7875040 | 2.7595310 | H  | -3.7302630 | -1.1840270 | -2.0784260 |
| H  | -2.3176370 | -1.7021780 | 2.7091720 | C  | -3.4019170 | 2.7001960  | -1.1865650 |
| H  | -0.6684840 | -1.0631990 | 2.5121300 | H  | -3.9009150 | 3.0167840  | -2.1159510 |
| H  | -1.7038320 | -0.4562250 | 3.8101010 |    |            |            |            |
| C  | -2.0849550 | 2.2470280  | 2.4126150 |    |            |            |            |
| H  | -1.0050980 | 2.4668100  | 2.4586990 |    |            |            |            |
| H  | -2.5623180 | 3.0389760  | 1.8124990 |    |            |            |            |



**Table S47.** Geometric coordinates and single point energies for NaHMDS disolvated styrene dimer.

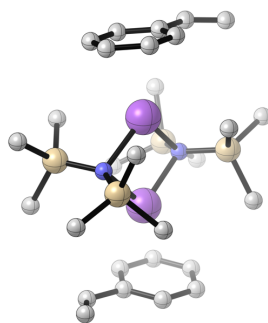

G = -2687.942165 Hartrees

G<sub>SP</sub> = -2689.812106 Hartrees

| Atom | X          | Y          | Z          | Atom | X          | Y          | Z          |
|------|------------|------------|------------|------|------------|------------|------------|
| Na   | 1.5006870  | -0.2799530 | -0.0754230 | H    | 1.3596410  | -4.4064780 | 0.9689800  |
| N    | -0.2706880 | -1.7628830 | 0.0677630  | C    | -1.9498340 | -2.6338600 | 2.3884110  |
| Na   | -1.4783440 | 0.2671830  | 0.0694990  | H    | -2.6615220 | -3.1694420 | 1.7403240  |
| N    | 0.3088720  | 1.7475570  | 0.0681380  | H    | -1.9278130 | -3.1370350 | 3.3680310  |
| Si   | 0.6783010  | 2.5161370  | -1.4129650 | H    | -2.3405460 | -1.6133570 | 2.5470210  |
| C    | 1.7595690  | 4.0682360  | -1.2885040 | Si   | -0.6892730 | -2.4468980 | -1.4426640 |
| H    | 2.1378820  | 4.3627990  | -2.2804450 | C    | -1.6619830 | -1.1553330 | -2.4523170 |
| H    | 1.1922760  | 4.9198380  | -0.8835370 | H    | -2.6461630 | -0.9728390 | -1.9907100 |
| H    | 2.6254640  | 3.8920420  | -0.6313750 | H    | -1.8484350 | -1.4998430 | -3.4812200 |
| C    | 1.6442240  | 1.2962150  | -2.5160740 | H    | -1.1294250 | -0.1912000 | -2.5283950 |
| H    | 2.6369090  | 1.0931120  | -2.0804790 | C    | 0.8079390  | -2.9118730 | -2.5121390 |
| H    | 1.1176620  | 0.3344850  | -2.6461470 | H    | 0.4891390  | -3.3037330 | -3.4910930 |
| H    | 1.8135360  | 1.7053520  | -3.5240220 | H    | 1.4684580  | -2.0484390 | -2.6957090 |
| C    | -0.8569670 | 3.0211550  | -2.4051460 | H    | 1.4050600  | -3.6909170 | -2.0122640 |
| H    | -1.5151990 | 2.1590530  | -2.6019030 | C    | -1.7800010 | -3.9968000 | -1.3843720 |
| H    | -1.4409480 | 3.7655330  | -1.8407610 | H    | -1.2002780 | -4.8844200 | -1.0892950 |
| H    | -0.5836810 | 3.4662550  | -3.3749340 | H    | -2.6049730 | -3.8742550 | -0.6660290 |
| Si   | 0.3129380  | 2.4532130  | 1.6246080  | H    | -2.2175500 | -4.2009340 | -2.3747830 |

|   |            |            |            |    |            |            |            |
|---|------------|------------|------------|----|------------|------------|------------|
| C | -0.8014270 | 1.4481160  | 2.8040440  | C  | 4.4064670  | -0.1146250 | 0.0636790  |
| H | -1.8516440 | 1.7653470  | 2.7291830  | C  | 4.0290040  | -0.9463590 | 1.1312860  |
| H | -0.7559860 | 0.3635590  | 2.6143370  | C  | 3.6872550  | -2.2837200 | 0.9148870  |
| H | -0.4941480 | 1.5960040  | 3.8513320  | C  | 3.7170030  | -2.8134940 | -0.3730780 |
| C | 2.0391070  | 2.4714750  | 2.4150010  | C  | 4.0992940  | -2.0009400 | -1.4443010 |
| H | 2.7355960  | 3.0503680  | 1.7879710  | C  | 4.4443410  | -0.6705170 | -1.2286250 |
| H | 2.0294420  | 2.9157550  | 3.4227180  | H  | 4.7595520  | -0.0562670 | -2.0731840 |
| H | 2.4410000  | 1.4477520  | 2.5049220  | H  | 4.1283630  | -2.4106720 | -2.4549180 |
| C | -0.3384190 | 4.2330250  | 1.7082380  | H  | 3.4486710  | -3.8568350 | -0.5433870 |
| H | -0.5201280 | 4.5404720  | 2.7504570  | H  | 3.3961890  | -2.9135160 | 1.7559060  |
| H | 0.3743250  | 4.9470610  | 1.2692390  | H  | 4.0059650  | -0.5376550 | 2.1446370  |
| H | -1.2871170 | 4.3220960  | 1.1542900  | C  | 4.7423690  | 1.2974410  | 0.3315290  |
| C | -4.4807590 | 0.7367170  | -1.1959920 | H  | 4.8217250  | 1.5606560  | 1.3903190  |
| C | -4.1908710 | 2.0855440  | -1.3713120 | C  | 4.9296120  | 2.2532050  | -0.5836540 |
| C | -3.8540810 | 2.8843270  | -0.2745690 | H  | 4.8409990  | 2.0676450  | -1.6568130 |
| C | -3.8139110 | 2.3207880  | 0.9981420  | H  | 5.1725930  | 3.2725480  | -0.2802920 |
| C | -4.0953930 | 0.9632230  | 1.1733510  | H  | -3.6292040 | 3.9424630  | -0.4139070 |
| C | -4.4285270 | 0.1464010  | 0.0806200  | H  | -4.2264770 | 2.5209300  | -2.3709070 |
| C | -4.7056260 | -1.2850240 | 0.3110950  | H  | -4.7588510 | 0.1336110  | -2.0613350 |
| H | -4.7362170 | -1.5856130 | 1.3626310  | Si | -0.2335120 | -2.5677040 | 1.5757210  |
| C | -4.8983250 | -2.2169530 | -0.6273590 | C  | 0.8925980  | -1.6632880 | 2.8399270  |
| H | -5.0961560 | -3.2528780 | -0.3485550 | H  | 1.7544590  | -2.2846950 | 3.1264110  |
| H | -4.8618640 | -1.9939220 | -1.6963610 | H  | 1.2827960  | -0.6942550 | 2.4859680  |
| H | -4.0628390 | 0.5253500  | 2.1744680  | H  | 0.3344680  | -1.4481960 | 3.7647230  |
| H | -3.5616650 | 2.9405480  | 1.8599380  | C  | 0.4015900  | -4.3545500 | 1.5114590  |
| H | -0.3103370 | -5.0167860 | 0.9968070  | H  | 0.5600880  | -4.7564000 | 2.5248420  |

**Table S48.** Geometric coordinates and single point energies for NaHMDS disolvated DMEA dimer.

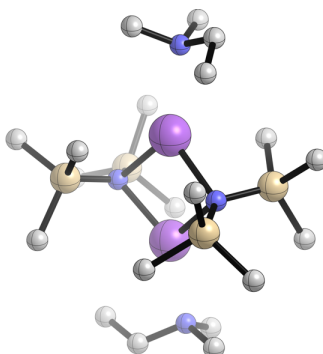

G = -2496.387851 Hartrees

G<sub>SP</sub> = -2498.065172 Hartrees

| Atom | X          | Y          | Z          | Atom | X          | Y          | Z          |
|------|------------|------------|------------|------|------------|------------|------------|
| N    | 0.2843140  | 1.8296480  | 0.1303500  | H    | -3.7818240 | 2.5875320  | 0.5510970  |
| Na   | -1.5035340 | 0.3048570  | -0.0225370 | C    | -4.5824090 | -0.5922280 | -0.2197540 |
| N    | -0.2733280 | -1.7262930 | 0.0745760  | H    | -4.4511860 | -1.1571880 | -1.1563650 |
| Na   | 1.4715660  | -0.1648410 | -0.1138520 | H    | -5.6774190 | -0.4695010 | -0.0795610 |
| N    | 3.8076260  | -0.8247340 | -0.5197340 | C    | -3.9820580 | -1.3921890 | 0.9251600  |
| C    | 3.9539130  | -2.2290110 | -0.1532590 | H    | -4.0656420 | -0.8738820 | 1.8915540  |
| H    | 5.0108610  | -2.5583420 | -0.2203180 | H    | -4.5017720 | -2.3550990 | 1.0279010  |
| H    | 3.6060420  | -2.3982160 | 0.8745820  | H    | -2.9188420 | -1.6187380 | 0.7438230  |
| H    | 3.3502560  | -2.8517060 | -0.8285030 | Si   | 0.4802660  | 2.7525380  | -1.2897030 |
| C    | 4.2841500  | -0.6433350 | -1.8860630 | C    | -1.1734480 | 3.0631470  | -2.1693310 |
| H    | 4.1355360  | 0.3874250  | -2.2261430 | H    | -1.0582460 | 3.6674060  | -3.0827790 |
| H    | 5.3622170  | -0.8916770 | -1.9709260 | H    | -1.6529310 | 2.1129720  | -2.4583020 |
| H    | 3.7255780  | -1.3054600 | -2.5621130 | H    | -1.8592670 | 3.5985120  | -1.4915780 |
| C    | 4.5363660  | 0.0280270  | 0.4245590  | C    | 1.5819260  | 1.8043320  | -2.5205440 |
| H    | 4.2010590  | -0.2439070 | 1.4388550  | H    | 1.5758100  | 2.2725510  | -3.5169860 |
| H    | 5.6224230  | -0.2035020 | 0.3816330  | H    | 2.6218950  | 1.8174320  | -2.1591160 |
| C    | 4.3129410  | 1.5176900  | 0.2078120  | H    | 1.2786480  | 0.7512020  | -2.6576650 |
| H    | 3.2402490  | 1.7734560  | 0.2231750  | C    | 1.3071780  | 4.4438180  | -1.0747670 |

|    |            |            |            |    |            |            |            |
|----|------------|------------|------------|----|------------|------------|------------|
| H  | 4.7957160  | 2.0846690  | 1.0153860  | H  | 0.6387220  | 5.1560680  | -0.5684130 |
| H  | 4.7390290  | 1.8687310  | -0.7425260 | H  | 2.2283470  | 4.3611490  | -0.4752820 |
| Si | -0.6766830 | -2.4315040 | -1.4271550 | H  | 1.5764990  | 4.8742980  | -2.0522360 |
| C  | -1.9401920 | -3.8436920 | -1.3523880 | Si | 0.1475860  | 2.3555090  | 1.7483390  |
| H  | -2.1799590 | -4.2206950 | -2.3590320 | C  | -0.4578060 | 4.1360100  | 1.9919510  |
| H  | -1.5671060 | -4.6915360 | -0.7576340 | H  | -0.7219760 | 4.3158350  | 3.0462080  |
| H  | -2.8778320 | -3.5010470 | -0.8861900 | H  | 0.3159300  | 4.8667360  | 1.7128000  |
| C  | -1.4722270 | -1.0923050 | -2.5255100 | H  | -1.3509760 | 4.3403840  | 1.3792820  |
| H  | -2.4459150 | -0.7784540 | -2.1135440 | C  | 1.7734410  | 2.2291830  | 2.7201340  |
| H  | -0.8345540 | -0.1961330 | -2.6167560 | H  | 2.4903290  | 2.9747450  | 2.3403750  |
| H  | -1.6618420 | -1.4615380 | -3.5448140 | H  | 1.6207570  | 2.4270020  | 3.7928680  |
| C  | 0.8307320  | -3.0700360 | -2.3880120 | H  | 2.2413710  | 1.2355400  | 2.6274820  |
| H  | 1.5684560  | -2.2600690 | -2.5208480 | C  | -1.1486360 | 1.2733840  | 2.6425160  |
| H  | 1.3214090  | -3.8886640 | -1.8381000 | H  | -2.1599740 | 1.5723500  | 2.3216360  |
| H  | 0.5613680  | -3.4451160 | -3.3876210 | H  | -1.0258970 | 0.1952520  | 2.4446990  |
| Si | 0.1168740  | -2.6063630 | 1.4901210  | H  | -1.1108020 | 1.4065500  | 3.7346990  |
| C  | 1.3225620  | -1.6071990 | 2.5787740  | H  | 0.3082520  | -4.9557330 | 0.6015400  |
| H  | 2.2512970  | -1.3294990 | 2.0510970  | H  | 1.8957930  | -4.1623670 | 0.6033640  |
| H  | 0.8659210  | -0.6781430 | 2.9519620  | N  | -3.9573850 | 0.7222070  | -0.4078250 |
| H  | 1.6282600  | -2.1969700 | 3.4572100  | C  | -4.3472760 | 1.2800210  | -1.6979120 |
| C  | -1.3668270 | -2.9917650 | 2.6066090  | H  | -5.4496600 | 1.3686470  | -1.7805590 |
| H  | -2.1110990 | -3.5988470 | 2.0667570  | H  | -3.9091380 | 2.2784910  | -1.8221900 |
| H  | -1.0502580 | -3.5585040 | 3.4963420  | H  | -3.9876600 | 0.6424910  | -2.5175170 |
| H  | -1.8676120 | -2.0741600 | 2.9534920  | C  | -4.3524780 | 1.6516320  | 0.6450320  |
| C  | 0.9620110  | -4.2789480 | 1.1737840  | H  | -5.4336860 | 1.8922170  | 0.5872890  |
| H  | 1.2065920  | -4.7799170 | 2.1237420  | H  | -4.1522610 | 1.2272440  | 1.6362880  |

**Table S49.** Geometric coordinates and single point energies for NaHMDS disolvated triethylamine dimer.

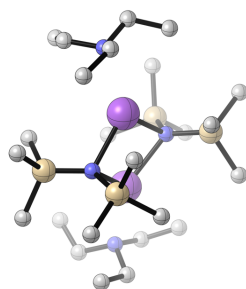

G = -2653.325993 Hartrees

G<sub>SP</sub> = -2655.178414 Hartrees

| Atom | X          | Y          | Z          | Atom | X          | Y          | Z          |
|------|------------|------------|------------|------|------------|------------|------------|
| C    | -3.4658810 | -0.9428330 | -3.1031770 | H    | -2.2612200 | 3.4163620  | -2.9169340 |
| C    | -3.8025220 | -1.7030440 | -1.8268230 | Si   | 0.6873490  | -2.0120520 | 2.0084050  |
| N    | -3.7759630 | -0.8808980 | -0.6108570 | C    | 1.5276890  | -0.4778670 | 2.7688710  |
| C    | -4.1438690 | -1.6753740 | 0.5710010  | H    | 2.5940040  | -0.4446130 | 2.4970900  |
| H    | -5.2325770 | -1.8972810 | 0.5454100  | H    | 1.0569810  | 0.4622310  | 2.4401030  |
| H    | -3.9785910 | -1.0496200 | 1.4622450  | H    | 1.4770390  | -0.4892310 | 3.8687940  |
| C    | -3.3668130 | -2.9727640 | 0.7302580  | C    | 1.8091120  | -3.4814230 | 2.4417260  |
| H    | -3.5504860 | -3.3871960 | 1.7304830  | H    | 1.8615620  | -3.6000350 | 3.5357420  |
| H    | -3.6686560 | -3.7308480 | -0.0046820 | H    | 1.4210180  | -4.4235110 | 2.0239580  |
| H    | -2.2803950 | -2.8144060 | 0.6339290  | H    | 2.8359240  | -3.3492810 | 2.0703490  |
| C    | -4.6759870 | 0.2714880  | -0.7300760 | C    | -0.8969490 | -2.3293720 | 3.0119630  |
| H    | -4.4676640 | 0.7708950  | -1.6834060 | H    | -1.2669990 | -3.3475280 | 2.8137020  |
| H    | -5.7289220 | -0.0805790 | -0.7790130 | H    | -0.6919820 | -2.2521130 | 4.0916470  |
| C    | -4.5099320 | 1.2974280  | 0.3779770  | H    | -1.7133310 | -1.6257560 | 2.7818920  |
| H    | -5.1185980 | 2.1852230  | 0.1560080  | C    | 2.3900210  | -3.4552200 | -1.1852210 |
| H    | -4.8200640 | 0.9245760  | 1.3640620  | H    | 2.4485290  | -4.2026640 | -1.9922630 |
| H    | -3.4604990 | 1.6266180  | 0.4360460  | H    | 2.9886130  | -2.5825200 | -1.4930680 |
| H    | -3.0651420 | -2.5081550 | -1.6972640 | H    | 2.8579290  | -3.8872800 | -0.2874280 |
| H    | -4.7937290 | -2.1948900 | -1.9347720 | C    | -0.3787270 | -4.5487920 | -0.5664060 |

|    |            |            |            |   |            |            |            |
|----|------------|------------|------------|---|------------|------------|------------|
| H  | -3.2292970 | -1.6568030 | -3.9036210 | H | -0.3175170 | -4.8756340 | 0.4835420  |
| H  | -4.2927590 | -0.3126450 | -3.4557380 | H | -1.4449830 | -4.4275860 | -0.8117220 |
| H  | -2.5833820 | -0.2994240 | -2.9592100 | H | 0.0125160  | -5.3636430 | -1.1955260 |
| H  | -1.0309840 | -1.8530140 | -2.4744990 | H | -0.0766270 | -3.1104720 | -3.2861020 |
| C  | -0.0239160 | -2.2929860 | -2.5496850 | H | 0.6455250  | -1.5221040 | -2.9626090 |
| Si | 0.5892630  | -2.9390350 | -0.8734500 | N | 3.8780980  | 0.6572240  | -0.6057130 |
| N  | 0.4042070  | -1.7399360 | 0.3373000  | C | 4.5744880  | 0.2292390  | 0.6164570  |
| Na | 1.4327010  | 0.3450580  | -0.0463710 | H | 5.6364160  | 0.5551210  | 0.5782590  |
| N  | -0.4453970 | 1.8408250  | 0.2342980  | H | 4.1186010  | 0.7621640  | 1.4620520  |
| Na | -1.4606110 | -0.2889920 | 0.1094240  | C | 4.4956490  | -1.2672720 | 0.8883170  |
| Si | -0.8628200 | 2.6053560  | 1.7167740  | H | 5.1833870  | -1.8541970 | 0.2654180  |
| C  | -1.6537440 | 1.3638480  | 2.9224760  | H | 4.7523100  | -1.4680540 | 1.9379860  |
| H  | -2.5708870 | 0.9196710  | 2.4988930  | H | 3.4755230  | -1.6420550 | 0.7101890  |
| H  | -0.9743560 | 0.5444750  | 3.1986180  | C | 3.9781920  | 2.1156170  | -0.7571060 |
| H  | -1.9496690 | 1.8717680  | 3.8539960  | H | 5.0486350  | 2.4070830  | -0.8181120 |
| C  | 0.6155990  | 3.3832350  | 2.6187410  | H | 3.5265750  | 2.3862570  | -1.7227090 |
| H  | 1.0481990  | 4.1931420  | 2.0091720  | C | 3.2900860  | 2.9157580  | 0.3395580  |
| H  | 0.2997700  | 3.8188810  | 3.5797820  | H | 3.3498150  | 3.9868570  | 0.1017170  |
| H  | 1.4150250  | 2.6553340  | 2.8265510  | H | 2.2183050  | 2.6700250  | 0.4247680  |
| C  | -2.1283140 | 4.0196160  | 1.5725220  | H | 3.7549300  | 2.7812440  | 1.3253130  |
| H  | -2.2825560 | 4.4794460  | 2.5616200  | C | 4.4630480  | -0.0110940 | -1.7757740 |
| H  | -1.7870300 | 4.8127930  | 0.8896420  | H | 4.5773030  | -1.0741110 | -1.5321360 |
| H  | -3.1080610 | 3.6709340  | 1.2132880  | H | 5.4871120  | 0.3830220  | -1.9500640 |
| Si | -0.5177980 | 2.6708170  | -1.2627110 | C | 3.6421400  | 0.0829780  | -3.0511730 |
| C  | 0.3173780  | 4.3748430  | -1.3186580 | H | 3.5101600  | 1.1135670  | -3.4076990 |
| H  | 0.1691820  | 4.8430990  | -2.3045880 | H | 4.1464290  | -0.4786180 | -3.8497950 |
| H  | -0.0867510 | 5.0611730  | -0.5592650 | H | 2.6463910  | -0.3616640 | -2.9068950 |
| H  | 1.4008250  | 4.2912920  | -1.1465580 | H | 1.4716300  | 1.5635100  | -2.3182780 |
| C  | 0.3960210  | 1.6199730  | -2.5550890 | H | 0.0042960  | 0.5892810  | -2.5975730 |
| H  | -2.7754770 | 1.9443330  | -2.0598310 | H | 0.3193930  | 2.0426430  | -3.5686700 |
| H  | -2.8844360 | 3.5261640  | -1.2501010 | C | -2.2743950 | 2.9173390  | -1.9352030 |

**Table S50.** Geometric coordinates and single point energies for NaHMDS disolvated *N*-methylpyrrolidine dimer.

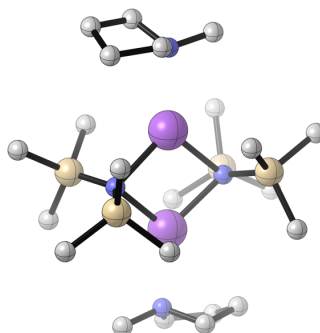

G = -2572.513393 Hartrees

G<sub>SP</sub> = -2574.267725 Hartrees

| Atom | X          | Y          | Z          | Atom | X          | Y          | Z          |
|------|------------|------------|------------|------|------------|------------|------------|
| Na   | 1.3759790  | 0.6067660  | 0.0348540  | H    | 3.0425660  | -3.7133410 | 2.3800170  |
| N    | 0.7288910  | -1.6419830 | -0.0909870 | H    | 2.4139740  | -4.4202330 | 0.8762400  |
| Na   | -1.3760200 | -0.6067850 | 0.0349890  | H    | 3.5371500  | -3.0450490 | 0.8037510  |
| N    | -0.7289740 | 1.6419590  | -0.0909820 | C    | -0.1776850 | -3.1461600 | 2.3442460  |
| Si   | -0.7117870 | 2.4346280  | -1.6032240 | H    | -0.5027790 | -4.0347170 | 1.7794860  |
| C    | -0.4517490 | 4.3133880  | -1.5322390 | H    | 0.1262740  | -3.4765020 | 3.3497690  |
| H    | -0.2835820 | 4.7251450  | -2.5400960 | H    | -1.0518860 | -2.4822380 | 2.4607880  |
| H    | -1.3283760 | 4.8256050  | -1.1075190 | Si   | 0.7118500  | -2.4346980 | -1.6032130 |
| H    | 0.4197320  | 4.5732260  | -0.9102910 | C    | -0.7396110 | -1.7755790 | -2.6547100 |
| C    | 0.7396650  | 1.7753020  | -2.6545950 | H    | -1.6930020 | -2.2172140 | -2.3217450 |
| H    | 1.6931480  | 2.2164290  | -2.3212200 | H    | -0.6222680 | -2.0503690 | -3.7143990 |
| H    | 0.8379230  | 0.6775850  | -2.6160290 | H    | -0.8383300 | -0.6779130 | -2.6158120 |
| H    | 0.6227080  | 2.0505080  | -3.7142170 | C    | 2.2894790  | -2.1688570 | -2.6227100 |
| C    | -2.2893660 | 2.1689140  | -2.6228280 | H    | 2.2007220  | -2.6183430 | -3.6242320 |
| H    | -2.5192060 | 1.0989000  | -2.7545570 | H    | 2.5192700  | -1.0988240 | -2.7543700 |
| H    | -3.1502350 | 2.6374070  | -2.1195450 | H    | 3.1503390  | -2.6373280 | -2.1193900 |
| H    | -2.2005170 | 2.6184430  | -3.6243230 | C    | 0.4520080  | -4.3134830 | -1.5321930 |

|    |            |            |            |    |            |            |            |
|----|------------|------------|------------|----|------------|------------|------------|
| Si | -1.2272550 | 2.2690800  | 1.4159120  | H  | 1.3286620  | -4.8256010 | -1.1074100 |
| C  | -1.7976100 | 0.8267150  | 2.5247630  | H  | -0.4194850 | -4.5734000 | -0.9102950 |
| H  | -2.6879400 | 0.3407530  | 2.0957840  | H  | 0.2839430  | -4.7252770 | -2.5400510 |
| H  | -1.0237670 | 0.0531990  | 2.6561830  | N  | 3.5811180  | 1.6696290  | 0.1826070  |
| H  | -2.0770230 | 1.1768390  | 3.5304070  | C  | 4.4977890  | 1.3588310  | 1.2883350  |
| C  | 0.1776780  | 3.1460670  | 2.3442400  | C  | 5.0622460  | -0.0431440 | 0.9731380  |
| H  | 0.5028290  | 4.0346040  | 1.7794770  | C  | 4.5533150  | -0.3487960 | -0.4498080 |
| H  | -0.1262310 | 3.4764310  | 3.3497700  | C  | 4.1899530  | 1.0311500  | -0.9864710 |
| H  | 1.0518320  | 2.4820790  | 2.4607550  | H  | 3.4944580  | 1.0102240  | -1.8396840 |
| C  | -2.6904650 | 3.4737670  | 1.3640600  | H  | 5.0990800  | 1.5840710  | -1.3067670 |
| H  | -3.0425030 | 3.7136380  | 2.3798860  | H  | 5.2882890  | -0.8715750 | -1.0751850 |
| H  | -2.4138130 | 4.4204010  | 0.8760880  | H  | 3.6462050  | -0.9743380 | -0.4119400 |
| H  | -3.5371230 | 3.0453230  | 0.8036430  | H  | 6.1595170  | -0.0247010 | 1.0064090  |
| N  | -3.5811040 | -1.6695710 | 0.1827140  | H  | 4.7307520  | -0.8025990 | 1.6937840  |
| C  | -4.4980630 | -1.3587780 | 1.2881980  | H  | 3.9716610  | 1.4235700  | 2.2526510  |
| C  | -5.0625150 | 0.0431520  | 0.9728050  | H  | 5.3179620  | 2.1039860  | 1.3081760  |
| C  | -4.5532820 | 0.3487580  | -0.4500440 | C  | 3.3502140  | 3.0963130  | 0.0396780  |
| C  | -4.1896800 | -1.0311870 | -0.9865500 | H  | 2.6418630  | 3.2938320  | -0.7773180 |
| H  | -3.4939650 | -1.0102370 | -1.8395840 | H  | 2.9149590  | 3.4963430  | 0.9660180  |
| H  | -5.0986780 | -1.5841920 | -1.3070640 | H  | 4.2911540  | 3.6438470  | -0.1723970 |
| H  | -5.2881560 | 0.8714360  | -1.0756240 | H  | -4.2908480 | -3.6438600 | -0.1725080 |
| H  | -3.6462310 | 0.9743750  | -0.4120080 | Si | 1.2271720  | -2.2690300 | 1.4159380  |
| H  | -6.1597920 | 0.0246650  | 1.0058390  | C  | 1.7972700  | -0.8265570 | 2.5247790  |
| H  | -4.7312110 | 0.8026530  | 1.6934880  | H  | 2.6875340  | -0.3404640 | 2.0958110  |
| H  | -3.9721670 | -1.4234470 | 2.2526470  | H  | 1.0232920  | -0.0531680 | 2.6561350  |
| H  | -5.3182020 | -2.1039770 | 1.3078700  | H  | 2.0767140  | -1.1765930 | 3.5304450  |
| C  | -3.3500380 | -3.0962400 | 0.0399150  | C  | 2.6905240  | -3.4735490 | 1.3641740  |
| H  | -2.6413430 | -3.2937220 | -0.7767930 |    |            |            |            |
| H  | -2.9151030 | -3.4962050 | 0.9664340  |    |            |            |            |



**Table S51.** Geometric coordinates and single point energies for NaHMDS disolvated pyrrolidine dimer.

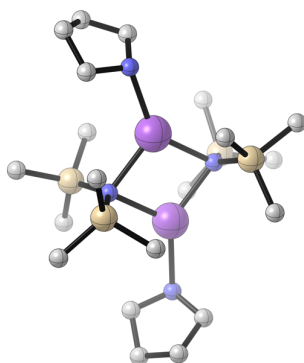

G = -2494.048679 Hartrees

G<sub>SP</sub> = -2495.71708 Hartrees

| Atom | X          | Y          | Z          | Atom | X          | Y         | Z          |
|------|------------|------------|------------|------|------------|-----------|------------|
| Na   | 1.4548970  | 0.2970370  | -0.2723700 | C    | -0.9870990 | 1.8109160 | 2.7599890  |
| N    | 0.0008980  | 2.1058510  | 0.0000480  | H    | -0.8866160 | 2.1809020 | 3.7917740  |
| Na   | -1.4550350 | 0.2985250  | 0.2722890  | H    | -2.0570760 | 1.8725070 | 2.4964120  |
| N    | -0.0010160 | -1.5232270 | 0.0001990  | H    | -0.6939470 | 0.7468210 | 2.7717170  |
| Si   | 0.5371410  | -2.2595150 | 1.4396140  | C    | -0.6706650 | 4.6006920 | 1.6325120  |
| C    | 1.3738590  | -3.9519510 | 1.2454640  | H    | -0.0017750 | 5.3336330 | 1.1572180  |
| H    | 1.8437500  | -4.2683070 | 2.1901990  | H    | -1.6487300 | 4.6591770 | 1.1285970  |
| H    | 0.6396430  | -4.7230430 | 0.9665860  | H    | -0.8094610 | 4.9069150 | 2.6814790  |
| H    | 2.1531040  | -3.9390760 | 0.4669620  | Si   | -0.0437640 | 2.8486310 | -1.5350890 |
| C    | 1.8187370  | -1.1147610 | 2.2667600  | C    | 0.6740990  | 4.6003520 | -1.6322960 |
| H    | 2.7115790  | -0.9840790 | 1.6309190  | H    | 0.8129590  | 4.9065640 | -2.6812580 |
| H    | 1.3931900  | -0.1171500 | 2.4667380  | H    | 0.0057990  | 5.3337270 | -1.1568430 |
| H    | 2.1678360  | -1.5162130 | 3.2304370  | H    | 1.6522810  | 4.6581000 | -1.1285220 |
| C    | -0.8493310 | -2.5092630 | 2.7117330  | C    | -1.8017040 | 2.9592590 | -2.2447910 |
| H    | -1.3682090 | -1.5606470 | 2.9292910  | H    | -2.4366000 | 3.5506640 | -1.5651160 |
| H    | -1.5955310 | -3.2175650 | 2.3168740  | H    | -1.8208040 | 3.4438500 | -3.2335640 |
| H    | -0.4715870 | -2.9115820 | 3.6647940  | H    | -2.2631210 | 1.9643690 | -2.3546860 |

|    |            |            |            |    |            |            |            |
|----|------------|------------|------------|----|------------|------------|------------|
| Si | -0.5391140 | -2.2590850 | -1.4394530 | C  | 0.9885200  | 1.8104620  | -2.7599760 |
| C  | -1.8194530 | -1.1133020 | -2.2670670 | H  | 2.0585400  | 1.8713150  | -2.4964060 |
| H  | -2.7123690 | -0.9818890 | -1.6314840 | H  | 0.6946580  | 0.7465630  | -2.7718080 |
| H  | -1.3930270 | -0.1160420 | -2.4669140 | H  | 0.8882540  | 2.1806190  | -3.7917210 |
| H  | -2.1685890 | -1.5144770 | -3.2308470 | N  | 3.7475700  | -0.0657900 | -0.8240560 |
| C  | 0.8477600  | -2.5098640 | -2.7109510 | C  | 4.6998070  | 0.4296750  | 0.2045510  |
| H  | 1.5932120  | -3.2187810 | -2.3157860 | H  | 5.3685110  | 1.1845020  | -0.2355450 |
| H  | 0.4701680  | -2.9118110 | -3.6642300 | H  | 4.1679950  | 0.9165510  | 1.0361870  |
| H  | 1.3674990  | -1.5616410 | -2.9281900 | C  | 5.4921960  | -0.8009340 | 0.6783460  |
| C  | -1.3772660 | -3.9508530 | -1.2457150 | C  | 5.4059950  | -1.7602570 | -0.5095530 |
| H  | -1.8466210 | -4.2670050 | -2.1907840 | C  | 3.9792840  | -1.5159390 | -0.9989990 |
| H  | -0.6438780 | -4.7224620 | -0.9660910 | H  | 3.8044230  | -1.8067720 | -2.0430580 |
| H  | -2.1571550 | -3.9372390 | -0.4678690 | H  | 3.2586240  | -2.0801870 | -0.3825710 |
| N  | -3.7481930 | -0.0624580 | 0.8232840  | H  | 6.1277040  | -1.4713560 | -1.2905760 |
| C  | -4.7004970 | 0.4318610  | -0.2058070 | H  | 5.5967860  | -2.8073980 | -0.2396750 |
| H  | -5.3695320 | 1.1867750  | 0.2336390  | H  | 5.0027880  | -1.2523360 | 1.5548580  |
| H  | -4.1687710 | 0.9182890  | -1.0377530 | H  | 6.5203030  | -0.5473070 | 0.9677260  |
| C  | -5.4923910 | -0.7993990 | -0.6787280 | H  | 3.9385450  | 0.4046550  | -1.7048790 |
| C  | -5.4060310 | -1.7577430 | 0.5099470  | H  | -3.9393630 | 0.4086880  | 1.7036890  |
| C  | -3.9794850 | -1.5125370 | 0.9994310  | Si | 0.0459830  | 2.8484740  | 1.5352510  |
| H  | -3.8047260 | -1.8024240 | 2.0437720  | C  | 1.8039230  | 2.9578190  | 2.2451380  |
| H  | -3.2585000 | -2.0770710 | 0.3836400  | H  | 1.8232680  | 3.4425030  | 3.2338610  |
| H  | -6.1279700 | -1.4684860 | 1.2906250  | H  | 2.2645410  | 1.9625780  | 2.3552010  |
| H  | -5.5964010 | -2.8051670 | 0.2408700  | H  | 2.4393620  | 3.5486560  | 1.5654770  |
| H  | -5.0027140 | -1.2513410 | -1.5548100 |    |            |            |            |
| H  | -6.5205460 | -0.5463570 | -0.9684510 |    |            |            |            |

**Table S52.** Geometric coordinates and single point energies for NaHMDS tetrasolvated pyrrolidine dimer.

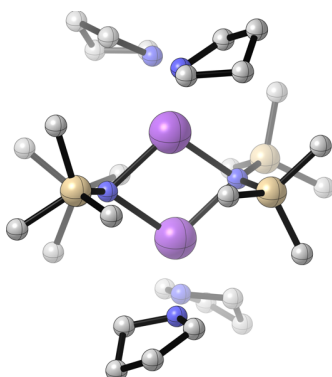

G = -2918.449045 Hartrees

G<sub>SP</sub> = -2920.596227 Hartrees

| Atom | X          | Y          | Z          | Atom | X          | Y          | Z          |
|------|------------|------------|------------|------|------------|------------|------------|
| Na   | -1.4538810 | -0.0012290 | 0.0013050  | H    | 4.5852400  | 4.0893070  | -0.9952020 |
| N    | 0.0186560  | 1.8048980  | 0.5683640  | H    | 3.3622840  | 3.5397630  | -2.9988550 |
| Na   | 1.5167780  | 0.0000370  | -0.0010170 | H    | 4.9404890  | 2.8853790  | -3.4596170 |
| N    | 0.0183270  | -1.8060570 | -0.5683710 | H    | 4.1877170  | 0.3286250  | -1.1057090 |
| Si   | 0.2105150  | -1.7246720 | -2.2677320 | Si   | 0.2087780  | 1.7232720  | 2.2679120  |
| C    | -1.0427740 | -2.7250260 | -3.2917280 | C    | 0.0176870  | -0.0894320 | 2.7870890  |
| H    | -0.9206420 | -2.5237090 | -4.3683650 | H    | -0.9715640 | -0.4821400 | 2.5072130  |
| H    | -0.9235790 | -3.8086470 | -3.1387060 | H    | 0.7568830  | -0.7261890 | 2.2766860  |
| H    | -2.0766860 | -2.4669690 | -3.0128220 | H    | 0.1451560  | -0.2392650 | 3.8716990  |
| C    | 0.0232510  | 0.0883250  | -2.7872290 | C    | -1.0441210 | 2.7256480  | 3.2904600  |
| H    | -0.9643130 | 0.4836710  | -2.5052210 | H    | -0.9230010 | 2.5247280  | 4.3672890  |
| H    | 0.7652880  | 0.7233350  | -2.2787560 | H    | -0.9231750 | 3.8090130  | 3.1369790  |
| H    | 0.1490650  | 0.2373610  | -3.8721450 | H    | -2.0782580 | 2.4690660  | 3.0110390  |
| C    | 1.9379400  | -2.2313650 | -2.8804720 | C    | 1.9361010  | 2.2276810  | 2.8826190  |
| H    | 2.6905550  | -1.5329330 | -2.4778930 | H    | 2.2063600  | 3.2438880  | 2.5573140  |
| H    | 2.2071050  | -3.2475520 | -2.5542120 | H    | 1.9996600  | 2.1892970  | 3.9819540  |
| H    | 2.0022830  | -2.1938970 | -3.9798000 | H    | 2.6883330  | 1.5289560  | 2.4798900  |

|    |            |            |            |    |            |            |            |
|----|------------|------------|------------|----|------------|------------|------------|
| Si | -0.2794590 | -3.3164620 | 0.1829670  | Si | -0.2763640 | 3.3154590  | -0.1836590 |
| C  | 0.1987130  | -3.3994790 | 2.0183730  | C  | 0.2050320  | 3.3979290  | -2.0181990 |
| H  | 1.2422040  | -3.0862730 | 2.1787740  | H  | 1.2487850  | 3.0844080  | -2.1762890 |
| H  | -0.4324230 | -2.7658400 | 2.6570200  | H  | 0.1101710  | 4.4381230  | -2.3688700 |
| H  | 0.1028100  | -4.4396950 | 2.3687010  | H  | -0.4248600 | 2.7643010  | -2.6580450 |
| C  | -2.1203380 | -3.7986630 | 0.1219070  | C  | -2.1166020 | 3.8003580  | -0.1251400 |
| H  | -2.4696700 | -3.8745810 | -0.9202160 | H  | -2.3110640 | 4.7638320  | -0.6222110 |
| H  | -2.3172150 | -4.7612810 | 0.6196870  | H  | -2.7221250 | 3.0316980  | -0.6329530 |
| H  | -2.7253380 | -3.0283640 | 0.6278760  | H  | -2.4674720 | 3.8757980  | 0.9165020  |
| C  | 0.6636250  | -4.7812850 | -0.5930040 | C  | 0.6676180  | 4.7790710  | 0.5936450  |
| H  | 0.3757820  | -5.7240660 | -0.1012630 | H  | 0.4624810  | 4.8894160  | 1.6696160  |
| H  | 0.4603130  | -4.8910180 | -1.6693790 | H  | 1.7577090  | 4.6620280  | 0.4781490  |
| H  | 1.7536840  | -4.6660990 | -0.4753790 | H  | 0.3823520  | 5.7222560  | 0.1011790  |
| N  | 3.4051020  | -0.9620720 | 1.2924090  | N  | -3.4152730 | -0.5462890 | 1.4996470  |
| C  | 3.4948740  | -1.3786950 | 2.7118450  | C  | -3.3993000 | -1.2653610 | 2.7884340  |
| H  | 4.0939110  | -0.6458540 | 3.2701030  | H  | -4.2794150 | -1.9246960 | 2.8959570  |
| H  | 2.4952160  | -1.3828800 | 3.1676650  | H  | -2.5010850 | -1.8937000 | 2.8755410  |
| C  | 4.1191570  | -2.7973590 | 2.7346700  | C  | -3.4579340 | -0.1509250 | 3.8275550  |
| C  | 4.5898640  | -3.0333140 | 1.2937440  | C  | -4.4380970 | 0.8343880  | 3.1892620  |
| C  | 3.6098930  | -2.1798980 | 0.4886100  | C  | -4.0762300 | 0.7654760  | 1.6983760  |
| H  | 3.9590990  | -1.9247940 | -0.5223280 | H  | -4.9719820 | 0.8690300  | 1.0636430  |
| H  | 2.6423250  | -2.6930490 | 0.3674550  | H  | -3.3821710 | 1.5796950  | 1.4239160  |
| H  | 5.6154840  | -2.6554610 | 1.1518030  | H  | -5.4705640 | 0.4860290  | 3.3449910  |
| H  | 4.5792160  | -4.0926010 | 1.0037680  | H  | -4.3612930 | 1.8523850  | 3.5941140  |
| H  | 3.3548850  | -3.5398350 | 3.0055930  | H  | -2.4671410 | 0.3156740  | 3.9348200  |
| H  | 4.9326820  | -2.8847870 | 3.4667730  | H  | -3.7779150 | -0.5090130 | 4.8146290  |
| H  | 4.1846340  | -0.3321190 | 1.1089610  | H  | -3.8987290 | -1.1005550 | 0.7986380  |
| N  | 3.4093870  | 0.9599300  | -1.2896300 | N  | -3.4084170 | 0.5490370  | -1.5036410 |
| C  | 3.5019550  | 1.3781870  | -2.7084660 | C  | -3.3904260 | 1.2693720  | -2.7915450 |
| H  | 4.1021910  | 0.6460000  | -3.2663080 | H  | -4.2695940 | 1.9299770  | -2.8993920 |
| H  | 2.5032530  | 1.3828520  | -3.1663870 | H  | -2.4912700 | 1.8965440  | -2.8772410 |

|   |            |            |            |
|---|------------|------------|------------|
| C | 4.1262750  | 2.7968210  | -2.7284170 |
| C | 4.5956010  | 3.0304320  | -1.2866930 |
| C | 3.6142990  | 2.1764550  | -0.4838020 |
| H | 3.9625660  | 1.9196050  | 0.5270120  |
| H | 2.6469810  | 2.6901090  | -0.3626030 |
| H | 5.6208470  | 2.6517760  | -1.1442190 |
| H | -4.3563290 | -1.8461830 | -3.6002990 |
| H | -2.4592780 | -0.3124350 | -3.9373650 |
| H | -3.7672820 | 0.5149720  | -4.8188360 |
| H | -3.8894310 | 1.1041340  | -0.8016150 |
| C | -3.4494550 | 0.1557620  | -3.8314750 |
| C | -4.4323930 | -0.8281830 | -3.1953180 |
| C | -4.0737270 | -0.7603120 | -1.7035260 |
| H | -4.9715940 | -0.8603590 | -1.0711930 |
| H | -3.3834250 | -1.5769970 | -1.4270030 |
| H | -5.4639910 | -0.4782370 | -3.3531660 |

**Table S53** Geometric coordinates and single point energies for NaHMDS disolvated pyrrolidine monomer.

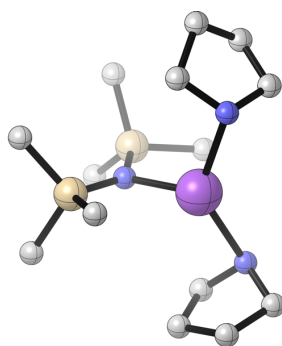

G = -1459.214564 Hartrees

G<sub>SP</sub> = -1460.29046 Hartrees

| Atom | X          | Y          | Z          | Atom | X          | Y          | Z          |
|------|------------|------------|------------|------|------------|------------|------------|
| Si   | -0.8028940 | -1.2404540 | -1.5973970 | H    | 3.6048970  | 0.5007000  | -2.0266480 |
| N    | -0.0633190 | -0.9718990 | -0.1035490 | H    | 2.1696300  | -0.3099930 | -1.2982760 |
| Si   | 0.2139420  | -1.9439060 | 1.2495330  | H    | 4.6724700  | -0.2847660 | -0.0584150 |
| C    | -1.2875110 | -2.9466720 | 1.8389040  | H    | 3.1576750  | -0.3561480 | 0.8459290  |
| H    | -1.0818840 | -3.4912320 | 2.7740770  | H    | 3.4599910  | 1.8083820  | 1.6633700  |
| H    | -2.1583410 | -2.2927620 | 2.0063960  | H    | 5.0379510  | 1.9006250  | 0.8728160  |
| H    | -1.5741290 | -3.6881550 | 1.0756040  | H    | 1.9421800  | 2.1703180  | -1.8011270 |
| C    | 0.6889480  | -0.8019980 | 2.7128720  | N    | -1.5242660 | 2.2887810  | 1.1785920  |
| H    | -0.1193390 | -0.0784100 | 2.9194820  | C    | -2.1039600 | 3.0737710  | 0.0595040  |
| H    | 0.8636030  | -1.3663160 | 3.6418670  | H    | -2.4452240 | 4.0599730  | 0.4133820  |
| H    | 1.6153560  | -0.2344820 | 2.5105530  | H    | -1.3598620 | 3.2544560  | -0.7331070 |
| C    | 1.6352640  | -3.1862330 | 1.0544460  | C    | -3.2909550 | 2.2468100  | -0.4440970 |
| H    | 1.3949950  | -3.9111120 | 0.2606420  | C    | -3.7837800 | 1.5552680  | 0.8263710  |
| H    | 2.5686710  | -2.6801490 | 0.7614550  | C    | -2.4647330 | 1.1796700  | 1.4998270  |
| H    | 1.8264450  | -3.7494260 | 1.9816640  | H    | -2.5436380 | 1.0497990  | 2.5880530  |
| Na   | 0.4088160  | 1.1393930  | 0.3944630  | H    | -2.0726960 | 0.2404980  | 1.0740960  |
| N    | 2.2981060  | 1.7819570  | -0.9283920 | H    | -4.3537460 | 2.2629820  | 1.4499960  |
| C    | 3.3657540  | 2.6070390  | -0.3564950 | H    | -4.4213730 | 0.6832900  | 0.6276780  |

|   |            |            |            |
|---|------------|------------|------------|
| H | 4.1272030  | 2.8652630  | -1.1169620 |
| H | 2.9698350  | 3.5444920  | 0.0590330  |
| C | 3.9770520  | 1.6788680  | 0.7007200  |
| C | 3.7373810  | 0.2544080  | 0.1390880  |
| C | 2.9308010  | 0.4694190  | -1.1506830 |
| H | -3.1408140 | -1.6423530 | -2.4880430 |
| H | -2.8662210 | -2.4995040 | -0.9510870 |
| C | -0.5700470 | 0.3128920  | -2.6880180 |
| H | -1.1473340 | 0.2570870  | -3.6241710 |
| H | -0.8853520 | 1.2338920  | -2.1652670 |
| H | 0.4921160  | 0.4273260  | -2.9623100 |
| C | -0.0852390 | -2.6871720 | -2.5939210 |
| H | 1.0014660  | -2.5667770 | -2.7285840 |
| H | -0.2473470 | -3.6357230 | -2.0568860 |
| H | -0.5472380 | -2.7805720 | -3.5895090 |
| H | -2.9447970 | 1.4892220  | -1.1646160 |
| H | -4.0500040 | 2.8645740  | -0.9414450 |
| H | -1.4181480 | 2.8895940  | 1.9908690  |
| C | -2.6756560 | -1.5595140 | -1.4928310 |
| H | -3.1922010 | -0.7580900 | -0.9401780 |

**Table S54.** Geometric coordinates and single point energies for NaHMDS trisolvated pyrrolidine monomer.

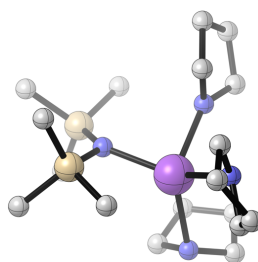

G = -1671.423598 Hartrees

G<sub>SP</sub> = -1672.737941 Hartrees

| Atom | X          | Y          | Z          | Atom | X          | Y          | Z          |
|------|------------|------------|------------|------|------------|------------|------------|
| Na   | -0.7645690 | -0.0143960 | -0.3708800 | H    | 1.2610440  | -2.3292750 | 3.2866880  |
| N    | 1.3424160  | 0.7254590  | 0.1942640  | H    | 1.6791080  | -4.1454450 | 1.8900240  |
| Si   | 2.9531650  | 0.1848680  | 0.0775710  | H    | 0.1362380  | -4.9081980 | 2.3010670  |
| C    | 4.1445040  | 0.9811460  | 1.3279180  | H    | 0.7419730  | -1.5530820 | 0.6417780  |
| H    | 3.8073040  | 0.7862950  | 2.3584640  | N    | -3.0651460 | -0.1329450 | 0.3570390  |
| H    | 5.1645980  | 0.5793490  | 1.2214300  | C    | -3.3384330 | 0.3575670  | 1.7297100  |
| H    | 4.2015550  | 2.0737590  | 1.1990460  | H    | -3.7692890 | -0.4462770 | 2.3477490  |
| C    | 3.1339320  | -1.6868850 | 0.4099160  | H    | -2.4132860 | 0.6892990  | 2.2262170  |
| H    | 4.1949240  | -1.9698580 | 0.3249500  | C    | -4.3416940 | 1.5075630  | 1.5636460  |
| H    | 2.8069780  | -1.9425740 | 1.4312910  | C    | -5.1028030 | 1.1211600  | 0.2956360  |
| H    | 2.5759690  | -2.3191770 | -0.3006210 | C    | -3.9738440 | 0.5659770  | -0.5728550 |
| C    | 3.7335920  | 0.4562680  | -1.6368980 | H    | -4.3170240 | -0.1143720 | -1.3645330 |
| H    | 3.2135670  | -0.1301730 | -2.4111990 | H    | -3.4333160 | 1.3960570  | -1.0588060 |
| H    | 3.6738150  | 1.5177160  | -1.9250340 | H    | -5.8377600 | 0.3302620  | 0.5161500  |
| H    | 4.7945300  | 0.1597440  | -1.6495890 | H    | -5.6341070 | 1.9616580  | -0.1702330 |
| Si   | 0.9697600  | 2.3536620  | 0.5126330  | H    | -3.8041780 | 2.4538050  | 1.3975440  |
| C    | 1.1210710  | 2.8702150  | 2.3327870  | H    | -4.9819380 | 1.6345410  | 2.4461760  |
| H    | 0.7990320  | 3.9113040  | 2.4942040  | H    | -3.2227750 | -1.1362430 | 0.3137140  |
| H    | 0.5018560  | 2.2166220  | 2.9683520  | N    | -1.0891800 | 0.1237960  | -2.7545020 |



|   |            |            |            |   |            |            |            |
|---|------------|------------|------------|---|------------|------------|------------|
| H | 2.1612100  | 2.7779230  | 2.6804960  | C | 0.3314930  | 0.0569450  | -3.1237500 |
| C | -0.8637210 | 2.6974780  | 0.0668260  | H | 0.4797320  | 0.2629590  | -4.2007450 |
| H | -1.5608150 | 2.1067960  | 0.6856560  | H | 0.9251380  | 0.7683730  | -2.5311140 |
| H | -1.1061640 | 3.7571380  | 0.2403720  | C | 0.6887430  | -1.4027590 | -2.8020470 |
| H | -1.0745590 | 2.4843070  | -0.9960940 | C | -0.6549640 | -2.1704400 | -2.8985010 |
| C | 1.9500010  | 3.6247650  | -0.5057550 | C | -1.6732430 | -1.0971250 | -3.3089910 |
| H | 3.0302550  | 3.5524840  | -0.3033550 | H | -1.7517550 | -1.0488560 | -4.4124650 |
| H | 1.8051410  | 3.4505210  | -1.5842570 | H | -2.6801620 | -1.2768180 | -2.9049890 |
| H | 1.6356660  | 4.6563280  | -0.2810820 | H | -0.6252540 | -2.9990880 | -3.6175090 |
| N | -0.1622310 | -2.0182900 | 0.7719470  | H | -0.9251070 | -2.5902660 | -1.9180320 |
| C | 0.0090710  | -3.4640390 | 0.6451040  | H | 1.1005070  | -1.4622640 | -1.7830680 |
| H | -0.9790810 | -3.9213390 | 0.4700300  | H | 1.4541440  | -1.7929280 | -3.4849610 |
| H | 0.6390520  | -3.7016410 | -0.2240060 | H | -1.5384520 | 0.9661590  | -3.1086570 |
| C | 0.6000940  | -3.9635600 | 1.9861610  |   |            |            |            |
| C | 0.3217580  | -2.8116440 | 2.9806820  |   |            |            |            |
| C | -0.5307560 | -1.8134590 | 2.1730880  |   |            |            |            |
| H | -1.6054920 | -2.0346390 | 2.2986440  |   |            |            |            |
| H | -0.3586250 | -0.7639530 | 2.4549090  |   |            |            |            |
| H | -0.1846940 | -3.1491650 | 3.8949170  |   |            |            |            |

**Table S55.** Geometric coordinates and single point energies for NaHMDS tetrasolvated pyrrolidine monomer.

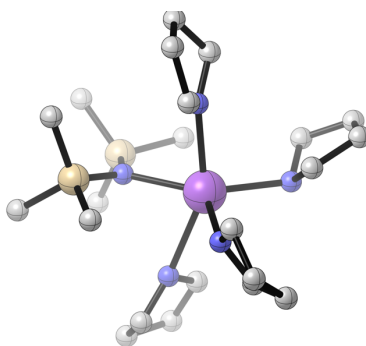

G = -1883.637203 Hartrees

G<sub>SP</sub> = -1885.189714 Hartrees

| Atom | X          | Y          | Z          | Atom | X         | Y          | Z          |
|------|------------|------------|------------|------|-----------|------------|------------|
| Na   | 0.5174560  | -0.2439810 | -0.2898570 | H    | 3.7914450 | -0.9209470 | -0.3289880 |
| N    | -1.6698000 | 0.5509190  | 0.0736100  | C    | 4.6246020 | 0.6041160  | -1.7264620 |
| Si   | -2.4144350 | 1.0657820  | -1.3680880 | C    | 3.9309150 | 1.0369790  | -3.0391720 |
| C    | -3.2905100 | 2.7460030  | -1.2480410 | C    | 2.4381450 | 0.7779620  | -2.7725400 |
| H    | -2.5922630 | 3.5227670  | -0.8954600 | H    | 1.9758010 | 1.6521310  | -2.2889210 |
| H    | -3.6968110 | 3.0678200  | -2.2198290 | H    | 1.8542690 | 0.5459980  | -3.6727230 |
| H    | -4.1270420 | 2.7041300  | -0.5320520 | H    | 4.1282470 | 2.0847740  | -3.3017460 |
| C    | -1.0925330 | 1.2623310  | -2.7243000 | H    | 4.2774740 | 0.4206230  | -3.8817290 |
| H    | -1.5347680 | 1.5737560  | -3.6834570 | H    | 5.4218590 | -0.1258230 | -1.9236630 |
| H    | -0.3511390 | 2.0234110  | -2.4327620 | H    | 5.0865260 | 1.4507970  | -1.2011140 |
| H    | -0.5431710 | 0.3229190  | -2.9053930 | H    | 2.6043320 | -1.1970740 | -2.3017520 |
| C    | -3.6918910 | -0.1673970 | -2.0453480 | N    | 0.9591980 | 2.1293840  | 0.2325690  |
| H    | -3.2289600 | -1.1516650 | -2.2241390 | C    | 1.2641870 | 3.4438670  | -0.3246920 |
| H    | -4.5093530 | -0.3133210 | -1.3218990 | H    | 2.3416330 | 3.4984450  | -0.5683770 |
| H    | -4.1337620 | 0.1744160  | -2.9947230 | H    | 0.7022290 | 3.6159080  | -1.2538830 |
| Si   | -2.3574510 | 0.6200410  | 1.6282280  | C    | 0.9211160 | 4.4329640  | 0.7955650  |
| C    | -2.3374580 | 2.3638300  | 2.3846780  | C    | 1.3797290 | 3.6864930  | 2.0599440  |
| H    | -2.7360230 | 2.3750040  | 3.4115380  | C    | 1.3970460 | 2.1912390  | 1.6321800  |

|   |            |            |            |   |            |            |            |
|---|------------|------------|------------|---|------------|------------|------------|
| H | -1.3119160 | 2.7671980  | 2.4161640  | H | 2.4178770  | 1.7821030  | 1.7224910  |
| H | -2.9438600 | 3.0535550  | 1.7769050  | H | 0.7413930  | 1.5596820  | 2.2495300  |
| C | -1.3917510 | -0.4854380 | 2.8446200  | H | 2.3856710  | 4.0105720  | 2.3627080  |
| H | -0.3447510 | -0.1568360 | 2.9484770  | H | 0.7103590  | 3.8679530  | 2.9116220  |
| H | -1.8451480 | -0.4652250 | 3.8477480  | H | -0.1694850 | 4.5843790  | 0.8148780  |
| H | -1.3885970 | -1.5329080 | 2.5004380  | H | 1.3966520  | 5.4160490  | 0.6763460  |
| C | -4.1563880 | 0.0153160  | 1.7117750  | H | -0.0605420 | 1.9785990  | 0.2144130  |
| H | -4.8135410 | 0.6503260  | 1.0958620  | N | 1.5961090  | -1.5615810 | 1.4107980  |
| H | -4.2379660 | -1.0144370 | 1.3264350  | C | 2.5131550  | -1.2382500 | 2.5107470  |
| H | -4.5483360 | 0.0263440  | 2.7410120  | H | 3.3007710  | -0.5529810 | 2.1512210  |
| N | -0.9552280 | -2.3717000 | -0.2978870 | H | 1.9755490  | -0.7234260 | 3.3195410  |
| C | -1.6803750 | -3.4905240 | 0.2962940  | C | 3.1373210  | -2.5723900 | 2.9228100  |
| H | -0.9902240 | -4.3382250 | 0.4651250  | C | 3.3207150  | -3.2462270 | 1.5614600  |
| H | -2.1073970 | -3.2083770 | 1.2691110  | C | 2.0676580  | -2.8129040 | 0.7761310  |
| C | -2.7371210 | -3.8727100 | -0.7469970 | H | 2.2887660  | -2.6561600 | -0.2923640 |
| C | -1.9795550 | -3.6952550 | -2.0723140 | H | 1.2757070  | -3.5739130 | 0.8214610  |
| C | -0.8447780 | -2.6887580 | -1.7257600 | H | 4.2305640  | -2.8542510 | 1.0791610  |
| H | 0.1400830  | -3.1406140 | -1.9360590 | H | 3.4240750  | -4.3378540 | 1.6184350  |
| H | -0.9098210 | -1.7622650 | -2.3171410 | H | 2.4257830  | -3.1434560 | 3.5404730  |
| H | -1.5529770 | -4.6515830 | -2.4075920 | H | 4.0725330  | -2.4654490 | 3.4889570  |
| H | -2.6310100 | -3.3296560 | -2.8776680 | H | 0.6610670  | -1.7251340 | 1.7805240  |
| H | -3.5734480 | -3.1588140 | -0.6853810 |   |            |            |            |
| H | -3.1440710 | -4.8844710 | -0.6132880 |   |            |            |            |
| H | -1.5087650 | -1.5080030 | -0.1816310 |   |            |            |            |
| N | 2.3884100  | -0.3292840 | -1.8092950 |   |            |            |            |
| C | 3.4883610  | -0.0223630 | -0.8832110 |   |            |            |            |
| H | 3.1044980  | 0.7080030  | -0.1531370 |   |            |            |            |

**Table S56.** Geometric coordinates and single point energies for NaHMDS disolvated pyridine dimer.

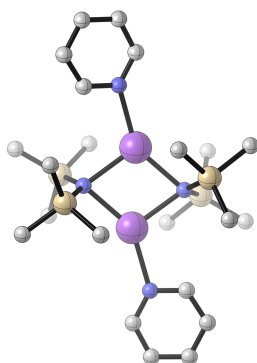

G = -2565.477035 Hartrees

G<sub>SP</sub> = -2567.213588 Hartrees

| Atom | X          | Y          | Z          | Atom | X          | Y          | Z          |
|------|------------|------------|------------|------|------------|------------|------------|
| Na   | 1.2621910  | -0.7352430 | -0.1978580 | C    | -0.5155930 | -4.3559180 | 1.0346890  |
| N    | -0.9262910 | -1.5789060 | -0.1307180 | H    | -0.4270870 | -4.8891360 | 1.9943890  |
| Na   | -1.2621920 | 0.7347690  | -0.1971920 | H    | -1.3275830 | -4.8297880 | 0.4619290  |
| N    | 0.9263370  | 1.5784970  | -0.1310030 | H    | 0.4205460  | -4.5122850 | 0.4747750  |
| Si   | 1.5570740  | 2.1147390  | -1.6273530 | C    | -2.3414420 | -2.3512290 | 2.4255100  |
| C    | 3.1635770  | 3.1217590  | -1.5123830 | H    | -3.2385200 | -2.7312520 | 1.9090240  |
| H    | 3.4999530  | 3.4407390  | -2.5114920 | H    | -2.2179730 | -2.9338850 | 3.3516700  |
| H    | 3.0301770  | 4.0274050  | -0.9007450 | H    | -2.5308970 | -1.3030330 | 2.7083800  |
| H    | 3.9768080  | 2.5305310  | -1.0620820 | Si   | -1.5571880 | -2.1157390 | -1.6267690 |
| C    | 1.9766160  | 0.5996270  | -2.7042790 | C    | -1.9772120 | -0.6009990 | -2.7040090 |
| H    | 2.8058310  | 0.0133500  | -2.2727750 | H    | -2.8062340 | -0.0146710 | -2.2721940 |
| H    | 1.1110340  | -0.0723860 | -2.8359320 | H    | -2.2945990 | -0.9095040 | -3.7118060 |
| H    | 2.2935130  | 0.9079200  | -3.7122960 | H    | -1.1117590 | 0.0710750  | -2.8361620 |
| C    | 0.3255790  | 3.1679010  | -2.6139240 | C    | -0.3256750 | -3.1690520 | -2.6131440 |
| H    | -0.6223670 | 2.6267740  | -2.7718190 | H    | -0.7185250 | -3.4516810 | -3.6022680 |
| H    | 0.0938260  | 4.0939820  | -2.0645170 | H    | 0.6220130  | -2.6276970 | -2.7717930 |
| H    | 0.7181110  | 3.4497310  | -3.6034020 | H    | -0.0933850 | -4.0946810 | -2.0631970 |
| Si   | 0.8180320  | 2.5019320  | 1.3040570  | C    | -3.1635070 | -3.1230300 | -1.5113480 |

|    |            |            |            |   |            |            |            |
|----|------------|------------|------------|---|------------|------------|------------|
| C  | -0.6810210 | 1.9165830  | 2.3303050  | H | -3.0298890 | -4.0285570 | -0.8995870 |
| H  | -1.6337240 | 2.2416930  | 1.8772880  | H | -3.9768250 | -2.5318910 | -1.0610940 |
| H  | -0.7187840 | 0.8203320  | 2.4485240  | H | -3.4999030 | -3.4422350 | -2.5103800 |
| H  | -0.6540300 | 2.3480620  | 3.3426360  | N | 3.5613620  | -1.2258210 | 0.0885860  |
| C  | 2.3421450  | 2.3536940  | 2.4241770  | C | 4.3204430  | -2.3221920 | 0.0455650  |
| H  | 3.2390040  | 2.7332850  | 1.9069980  | C | 5.6802860  | -2.3118310 | 0.3484130  |
| H  | 2.2187230  | 2.9375200  | 3.3496090  | C | 6.2704230  | -1.1037190 | 0.7150060  |
| H  | 2.5319100  | 1.3059200  | 2.7083920  | C | 5.4806720  | 0.0419540  | 0.7637500  |
| C  | 0.5147150  | 4.3561690  | 1.0322550  | C | 4.1293230  | -0.0685400 | 0.4402990  |
| H  | 0.4261680  | 4.8902380  | 1.9914760  | H | 3.4675890  | 0.8044490  | 0.4649760  |
| H  | 1.3262750  | 4.8299680  | 0.4588190  | H | 5.8936840  | 1.0101010  | 1.0474210  |
| H  | -0.4216550 | 4.5114930  | 0.4724300  | H | 7.3327550  | -1.0574030 | 0.9602590  |
| N  | -3.5612730 | 1.2260060  | 0.0890760  | H | 6.2588290  | -3.2340110 | 0.2970290  |
| C  | -4.3199240 | 2.3227010  | 0.0466810  | H | 3.8209600  | -3.2515730 | -0.2428280 |
| C  | -5.6799190 | 2.3125700  | 0.3488680  |   |            |            |            |
| C  | -6.2706900 | 1.1043550  | 0.7140840  |   |            |            |            |
| C  | -5.4813910 | -0.0416580 | 0.7621790  |   |            |            |            |
| C  | -4.1298500 | 0.0686240  | 0.4394780  |   |            |            |            |
| H  | -3.4684570 | -0.8046370 | 0.4637040  |   |            |            |            |
| H  | -5.8949080 | -1.0099040 | 1.0447740  |   |            |            |            |
| H  | -7.3331580 | 1.0582210  | 0.9587750  |   |            |            |            |
| H  | -6.2580910 | 3.2350140  | 0.2980310  |   |            |            |            |
| H  | -3.8200130 | 3.2521900  | -0.2406460 |   |            |            |            |
| Si | -0.8178040 | -2.5012900 | 1.3049910  |   |            |            |            |
| C  | 0.6820850  | -1.9159960 | 2.3300910  |   |            |            |            |
| H  | 1.6343150  | -2.2423230 | 1.8769600  |   |            |            |            |
| H  | 0.7208520  | -0.8196780 | 2.4473760  |   |            |            |            |
| H  | 0.6551200  | -2.3466150 | 3.3427920  |   |            |            |            |

**Table S57.** Geometric coordinates and single point energies for NaHMDS tetrasolvated pyridine dimer.

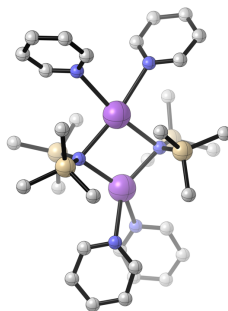

G = -3061.307522 Hartrees

G<sub>SP</sub> = -3063.5893 Hartrees

| Atom | X          | Y          | Z          | Atom | X          | Y          | Z          |
|------|------------|------------|------------|------|------------|------------|------------|
| Na   | -1.6723430 | 0.0024250  | -0.0015520 | H    | -2.2467950 | 0.7042010  | 2.3589280  |
| N    | -0.0277380 | 1.8054640  | 0.1988120  | H    | -0.7967890 | -0.3220980 | 2.4576940  |
| Na   | 1.4731760  | -0.0038890 | 0.0037950  | H    | -1.1941820 | 0.7740420  | 3.7852960  |
| N    | -0.0334530 | -1.8065800 | -0.1980360 | C    | -0.6688590 | 3.7189300  | 2.5182440  |
| Si   | -0.0921090 | -2.0214720 | -1.8847900 | H    | -0.9872240 | 3.6605610  | 3.5717110  |
| C    | -0.6726770 | -3.7190580 | -2.5190720 | H    | 0.1570550  | 4.4446540  | 2.4598380  |
| H    | -0.9891210 | -3.6597000 | -3.5730640 | H    | -1.5014380 | 4.1265500  | 1.9242680  |
| H    | 0.1521370  | -4.4459460 | -2.4596390 | C    | 1.5994400  | 1.7440980  | 2.7292850  |
| H    | -1.5067910 | -4.1259120 | -1.9267650 | H    | 2.3259600  | 2.5115980  | 2.4145270  |
| C    | -1.1942380 | -0.6795760 | -2.6893620 | H    | 1.5098240  | 1.8005750  | 3.8259350  |
| H    | -2.2463440 | -0.7010130 | -2.3611060 | H    | 2.0215020  | 0.7526790  | 2.4886880  |
| H    | -0.7939840 | 0.3221450  | -2.4591770 | Si   | -0.0452870 | 2.9888950  | -1.0353050 |
| H    | -1.1927580 | -0.7737160 | -3.7864800 | C    | 1.0127670  | 2.5106270  | -2.5484630 |
| C    | 1.5986500  | -1.7474570 | -2.7255930 | H    | 2.0445140  | 2.8806810  | -2.4554480 |
| H    | 2.0205160  | -0.7559670 | -2.4850900 | H    | 0.5824050  | 2.9634500  | -3.4560820 |
| H    | 2.3242080  | -2.5148400 | -2.4083720 | H    | 1.0734680  | 1.4239490  | -2.7129180 |
| H    | 1.5113070  | -1.8051680 | -3.8223680 | C    | -1.7698140 | 3.3275700  | -1.7595470 |
| Si   | -0.0534290 | -2.9899550 | 1.0360960  | H    | -1.7048510 | 4.0910710  | -2.5514840 |
| C    | 1.0078150  | -2.5145140 | 2.5479180  | H    | -2.2018250 | 2.4190720  | -2.2101750 |
| H    | 2.0398860  | -2.8826130 | 2.4511750  | H    | -2.4693880 | 3.6940680  | -0.9915910 |

|   |            |            |            |    |            |            |            |
|---|------------|------------|------------|----|------------|------------|------------|
| H | 1.0672610  | -1.4282570 | 2.7158290  | C  | -4.6322290 | 3.6567500  | 0.9264110  |
| H | 0.5804710  | -2.9708330 | 3.4552060  | C  | -5.4251090 | 3.6591600  | -0.2181290 |
| C | -1.7774870 | -3.3236940 | 1.7637450  | C  | -5.3404420 | 2.5761640  | -1.0888030 |
| H | -2.4800170 | -3.6918640 | 0.9992610  | C  | -4.4624930 | 1.5390570  | -0.7777850 |
| H | -1.7117910 | -4.0846600 | 2.5580780  | N  | -3.6944700 | 1.5335570  | 0.3132930  |
| H | -2.2071260 | -2.4132040 | 2.2125870  | C  | -3.7835120 | 2.5723990  | 1.1451840  |
| C | 0.5878090  | -4.7060150 | 0.5124320  | H  | -3.1429490 | 2.5478840  | 2.0302870  |
| H | 0.7226470  | -5.3444060 | 1.4004590  | H  | -4.3694650 | 0.6699690  | -1.4357670 |
| H | -0.1158480 | -5.2153630 | -0.1627340 | H  | -5.9367490 | 2.5307410  | -1.9999170 |
| H | 1.5599390  | -4.6459620 | -0.0046770 | H  | -6.0969550 | 4.4927940  | -0.4291040 |
| N | 3.4662890  | -1.0096830 | 1.0648640  | H  | -4.6585480 | 4.4797450  | 1.6407730  |
| C | 4.5244600  | -0.4388240 | 1.6381950  | C  | 0.6008280  | 4.7032580  | -0.5118670 |
| C | 5.8115520  | -0.9684510 | 1.5508870  | H  | -0.1013850 | 5.2141990  | 0.1636230  |
| C | 5.9970700  | -2.1468280 | 0.8309100  | H  | 1.5730480  | 4.6409810  | 0.0047830  |
| C | 4.8913530  | -2.7503720 | 0.2364930  | H  | 0.7367140  | 5.3413950  | -1.3999200 |
| C | 3.6446660  | -2.1427820 | 0.3844420  | C  | -4.4662370 | -1.5346000 | 0.7766660  |
| H | 2.7447690  | -2.5799960 | -0.0625940 | C  | -5.3462240 | -2.5707970 | 1.0849850  |
| H | 4.9834150  | -3.6762760 | -0.3314900 | C  | -5.4299670 | -3.6533750 | 0.2137000  |
| H | 6.9897960  | -2.5906980 | 0.7376930  | C  | -4.6342400 | -3.6514430 | -0.9288790 |
| H | 6.6455320  | -0.4620230 | 2.0369580  | C  | -3.7838490 | -2.5679190 | -1.1450940 |
| H | 4.3379270  | 0.4905960  | 2.1859800  | H  | -3.1412510 | -2.5436440 | -2.0286850 |
| C | 3.6410150  | 2.1364940  | -0.3809660 | N  | -3.6957570 | -1.5294340 | -0.3126840 |
| C | 4.8859850  | 2.7488100  | -0.2383160 | H  | -4.6596180 | -4.4741800 | -1.6435730 |
| C | 5.9915950  | 2.1490550  | -0.8368010 | H  | -6.1032950 | -4.4863130 | 0.4226950  |
| C | 5.8076370  | 0.9695840  | -1.5553530 | H  | -5.9447360 | -2.5250600 | 1.9946390  |
| C | 4.5221430  | 0.4351700  | -1.6374060 | H  | -4.3736430 | -0.6659280 | 1.4352620  |
| N | 3.4641700  | 1.0024430  | -1.0602540 | H  | 4.9768360  | 3.6753780  | 0.3287900  |
| H | 4.3368460  | -0.4951250 | -2.1841360 | H  | 2.7412100  | 2.5703760  | 0.0694550  |
| H | 6.6415890  | 0.4659910  | -2.0444140 | Si | -0.0895650 | 2.0203870  | 1.8854510  |
| H | 6.9830170  | 2.5966970  | -0.7478040 | C  | -1.1950650 | 0.6803290  | 2.6881370  |

**Table S58.** Geometric coordinates and single point energies for NaHMDS disolvated pyridine monomer.

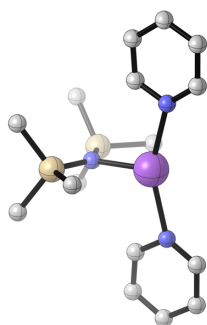

G = -1530.645531 Hartrees

G<sub>SP</sub> = -1531.790063 Hartrees

| Atom | X          | Y          | Z          | Atom | X          | Y          | Z          |
|------|------------|------------|------------|------|------------|------------|------------|
| Si   | -0.0098660 | -1.6839690 | 1.5673380  | H    | 2.2988800  | -0.2884610 | 0.0101570  |
| N    | 0.0000240  | -1.0509310 | 0.0000220  | Si   | 0.0097990  | -1.6839860 | -1.5672880 |
| Na   | 0.0000390  | 1.1924550  | -0.0000070 | C    | 1.5406010  | -2.7251040 | -1.9939550 |
| N    | -2.3074040 | 1.7783660  | -0.0042770 | H    | 1.5271680  | -3.0651190 | -3.0416420 |
| C    | -3.0382390 | 2.8956280  | -0.0014340 | H    | 2.4658100  | -2.1467440 | -1.8386720 |
| C    | -4.4306890 | 2.8931110  | -0.0025450 | H    | 1.5949400  | -3.6168870 | -1.3498930 |
| C    | -5.0918770 | 1.6661980  | -0.0067490 | C    | 0.0031470  | -0.2152110 | -2.7860950 |
| C    | -4.3351510 | 0.4983080  | -0.0097490 | H    | 0.8940740  | 0.4203180  | -2.6361730 |
| C    | -2.9439770 | 0.6000050  | -0.0084360 | H    | 0.0085730  | -0.5365750 | -3.8390180 |
| H    | -2.2988560 | -0.2884160 | -0.0104460 | H    | -0.8967210 | 0.4086780  | -2.6413000 |
| H    | -4.8040140 | -0.4857860 | -0.0129820 | C    | -1.5009060 | -2.7499010 | -2.0034730 |
| H    | -6.1823730 | 1.6235980  | -0.0076500 | H    | -1.5390730 | -3.6473180 | -1.3660680 |
| H    | -4.9794230 | 3.8348260  | -0.0000720 | H    | -2.4367580 | -2.1900270 | -1.8443250 |
| H    | -2.4893640 | 3.8414870  | 0.0019010  | H    | -1.4802750 | -3.0819960 | -3.0535680 |
| N    | 2.3074850  | 1.7783230  | 0.0042840  | C    | 1.5008080  | -2.7498840 | 2.0036290  |
| C    | 2.9440250  | 0.5999430  | 0.0082670  | H    | 2.4366690  | -2.1900020 | 1.8445620  |
| C    | 4.3351970  | 0.4982100  | 0.0095190  | H    | 1.4800970  | -3.0819970 | 3.0537170  |
| C    | 5.0919540  | 1.6660800  | 0.0066470  | H    | 1.5390280  | -3.6472910 | 1.3662120  |
| C    | 4.4307990  | 2.8930120  | 0.0026200  | C    | -0.0032750 | -0.2151800 | 2.7861280  |



|   |            |            |            |
|---|------------|------------|------------|
| C | 3.0383490  | 2.8955650  | 0.0015500  |
| H | 2.4894990  | 3.8414400  | -0.0016540 |
| H | 4.9795580  | 3.8347120  | 0.0002470  |
| H | 6.1824490  | 1.6234500  | 0.0075030  |
| H | 4.8040340  | -0.4858970 | 0.0125970  |
| H | -1.5949760 | -3.6168940 | 1.3498990  |
| H | -1.5273420 | -3.0650470 | 3.0416260  |
| H | -0.0087450 | -0.5365290 | 3.8390550  |
| H | 0.8966000  | 0.4087050  | 2.6413620  |
| H | -0.8941940 | 0.4203500  | 2.6361600  |
| C | -1.5406960 | -2.7250800 | 1.9939230  |
| H | -2.4659010 | -2.1467390 | 1.8385410  |

**Table S59.** Geometric coordinates and single point energies for NaHMDS trisolvated pyridine monomer.

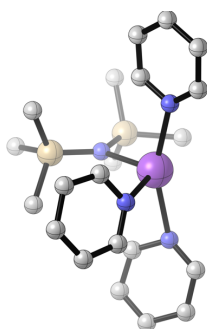

G = -1778.568232 Hartrees

G<sub>SP</sub> = -1779.985009 Hartrees

| Atom | X          | Y          | Z          | Atom | X          | Y         | Z          |
|------|------------|------------|------------|------|------------|-----------|------------|
| Na   | 0.0115690  | 0.2830760  | -1.1430790 | N    | 1.0427110  | 2.1509140 | 0.0098140  |
| N    | -0.4969390 | -1.3223280 | 0.4087100  | C    | 2.3472230  | 2.3251560 | 0.2320680  |
| Si   | -1.1131530 | -2.6094690 | -0.5095440 | C    | 2.8464690  | 2.9513780 | 1.3725440  |
| C    | -2.9300890 | -3.0509610 | -0.1506910 | C    | 1.9436180  | 3.4077090 | 2.3301860  |
| H    | -3.5918340 | -2.1905390 | -0.3420280 | C    | 0.5820170  | 3.2291260 | 2.1038260  |
| H    | -3.2787460 | -3.8872190 | -0.7775130 | C    | 0.1824730  | 2.5986240 | 0.9261830  |
| H    | -3.0613250 | -3.3439430 | 0.9031510  | H    | -0.8785920 | 2.4359600 | 0.7144380  |
| C    | -1.0601680 | -2.1232970 | -2.3556150 | H    | -0.1648810 | 3.5581230 | 2.8261560  |
| H    | -1.4415120 | -2.9341040 | -2.9951040 | H    | 2.2973680  | 3.8896100 | 3.2430370  |
| H    | -1.6839820 | -1.2345540 | -2.5569410 | H    | 3.9222040  | 3.0636230 | 1.5066070  |
| H    | -0.0268270 | -1.9104880 | -2.6803120 | H    | 3.0303220  | 1.9387900 | -0.5309740 |
| C    | -0.1366690 | -4.2319030 | -0.3737340 | N    | -2.1240700 | 1.3853500 | -1.3634970 |
| H    | 0.9268860  | -4.0626510 | -0.6065910 | C    | -2.9334010 | 0.8079010 | -0.4670800 |
| H    | -0.1953060 | -4.6385180 | 0.6476630  | C    | -4.2484050 | 1.2273920 | -0.2628720 |
| H    | -0.5200240 | -4.9983640 | -1.0659770 | C    | -4.7386970 | 2.2855750 | -1.0226700 |
| Si   | -0.3751590 | -1.1886250 | 2.0950080  | C    | -3.8966160 | 2.8873740 | -1.9562910 |
| C    | -1.7149820 | -0.0536610 | 2.8409980  | C    | -2.5976970 | 2.4012080 | -2.0877730 |
| H    | -1.5975030 | 0.0557130  | 3.9310330  | H    | -1.9085850 | 2.8519740 | -2.8076750 |
| H    | -1.6940120 | 0.9546770  | 2.3968810  | H    | -4.2351510 | 3.7192850 | -2.5738920 |

|   |            |            |            |
|---|------------|------------|------------|
| H | -2.7155780 | -0.4779860 | 2.6523010  |
| C | 1.3036260  | -0.4689930 | 2.6346760  |
| H | 1.5611120  | 0.4466630  | 2.0793680  |
| H | 1.3127630  | -0.2269800 | 3.7096290  |
| H | 2.1060590  | -1.2037830 | 2.4539630  |
| C | -0.5267950 | -2.8256580 | 3.0517250  |
| H | -1.4743530 | -3.3407470 | 2.8268100  |
| H | 0.2950270  | -3.5090560 | 2.7857280  |
| H | -0.4861230 | -2.6572600 | 4.1398050  |
| N | 2.2468250  | -0.3253960 | -1.8015780 |
| C | 2.6498680  | -0.9623300 | -0.6961820 |
| C | 3.9981500  | -1.1127750 | -0.3669330 |
| C | 4.9596240  | -0.5853030 | -1.2240300 |
| C | 4.5398580  | 0.0686600  | -2.3819450 |
| C | 3.1712990  | 0.1718380  | -2.6247100 |
| H | 2.8056000  | 0.6837680  | -3.5195370 |
| H | 5.2552700  | 0.4935480  | -3.0861910 |
| H | 6.0226860  | -0.6832650 | -0.9967950 |
| H | -5.7628590 | 2.6388430  | -0.8904980 |
| H | -4.8654190 | 0.7245510  | 0.4820720  |
| H | -2.4910200 | -0.0161220 | 0.1070580  |
| H | 4.2755210  | -1.6328350 | 0.5500570  |
| H | 1.8479980  | -1.3493880 | -0.0525820 |

**Table S60.** Geometric coordinates and single point energies for NaHMDS tetrasolvated pyridine monomer.

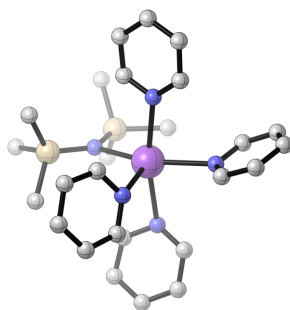

G = -2026.490481 Hartrees

G<sub>SP</sub> = -2028.179273 Hartrees

| Atom | X          | Y          | Z          | Atom | X          | Y          | Z          |
|------|------------|------------|------------|------|------------|------------|------------|
| Na   | 0.3952000  | -0.1675690 | -0.3604390 | C    | -0.1253000 | -0.4896400 | 2.6863110  |
| N    | -1.5467300 | 1.0990280  | -0.5904780 | H    | 0.3330240  | 0.4894060  | 2.5167820  |
| Si   | -1.3033660 | 1.7926990  | -2.1174030 | H    | -1.0240720 | 0.0534330  | 4.5704380  |
| C    | -1.2623670 | 3.6969390  | -2.1425220 | H    | -2.0484250 | -2.2270930 | 4.8759760  |
| H    | -0.4564280 | 4.0816160  | -1.4964550 | H    | -1.6699790 | -3.9548570 | 3.0837360  |
| H    | -1.0945400 | 4.0888640  | -3.1585400 | H    | -0.3103610 | -3.3329770 | 1.0875700  |
| H    | -2.2127460 | 4.1147120  | -1.7741640 | N    | 1.7699510  | 1.6435020  | 0.6557170  |
| C    | 0.4093270  | 1.2538970  | -2.7797440 | C    | 1.0006620  | 2.7302330  | 0.7851420  |
| H    | 0.6045050  | 1.6821720  | -3.7749790 | C    | 1.4975710  | 3.9560630  | 1.2308620  |
| H    | 1.2127400  | 1.6025650  | -2.1068860 | C    | 2.8487350  | 4.0536480  | 1.5502750  |
| H    | 0.4716210  | 0.1550180  | -2.8714470 | C    | 3.6519770  | 2.9228850  | 1.4129580  |
| C    | -2.5542110 | 1.2728190  | -3.4482010 | C    | 3.0647030  | 1.7420830  | 0.9619120  |
| H    | -2.5911330 | 0.1749560  | -3.5329400 | H    | 3.6673590  | 0.8354610  | 0.8420680  |
| H    | -3.5652920 | 1.6241160  | -3.1899850 | H    | 4.7159260  | 2.9495060  | 1.6488160  |
| H    | -2.2955290 | 1.6836890  | -4.4371810 | H    | 3.2724630  | 4.9967600  | 1.9000810  |
| Si   | -2.8343650 | 1.3334340  | 0.4852170  | H    | 0.8264650  | 4.8108770  | 1.3183610  |
| C    | -2.3731350 | 2.4432040  | 1.9688130  | H    | -0.0518000 | 2.5936710  | 0.5091320  |
| H    | -3.2097910 | 2.5348480  | 2.6799210  | N    | 2.6347160  | -1.0567830 | -0.8239240 |
| H    | -1.5012780 | 2.0563400  | 2.5205440  | C    | 3.4658590  | -0.5247770 | -1.7204820 |
| H    | -2.1195220 | 3.4579690  | 1.6182740  | C    | 4.8523820  | -0.6608190 | -1.6424440 |

|   |            |            |            |   |           |            |            |
|---|------------|------------|------------|---|-----------|------------|------------|
| C | -3.4737440 | -0.3036010 | 1.2234480  | C | 5.3907270 | -1.3869120 | -0.5826570 |
| H | -2.6501480 | -0.9646110 | 1.5352140  | C | 4.5241990 | -1.9478790 | 0.3533740  |
| H | -4.1203180 | -0.1275510 | 2.0983430  | C | 3.1523120 | -1.7528550 | 0.1895490  |
| H | -4.0725150 | -0.8499160 | 0.4753990  | H | 2.4337880 | -2.1562320 | 0.9099640  |
| C | -4.3827950 | 2.1491430  | -0.2636970 | H | 4.8981360 | -2.5233350 | 1.2002810  |
| H | -4.1501190 | 3.1285120  | -0.7111560 | H | 6.4705140 | -1.5138480 | -0.4871610 |
| H | -4.8116490 | 1.5145530  | -1.0553630 | H | 5.4896300 | -0.2030200 | -2.3990220 |
| H | -5.1609470 | 2.3048990  | 0.5008170  | H | 3.0023830 | 0.0432690  | -2.5326280 |
| N | -0.4695820 | -2.1696550 | -1.4314520 |   |           |            |            |
| C | 0.1661060  | -3.3298550 | -1.5926720 |   |           |            |            |
| C | -0.4818750 | -4.5639450 | -1.5394190 |   |           |            |            |
| C | -1.8561760 | -4.5798210 | -1.3014690 |   |           |            |            |
| C | -2.5224210 | -3.3684550 | -1.1373280 |   |           |            |            |
| C | -1.7870720 | -2.1835860 | -1.2145900 |   |           |            |            |
| H | -2.2471560 | -1.1975080 | -1.0816150 |   |           |            |            |
| H | -3.5951980 | -3.3293330 | -0.9470720 |   |           |            |            |
| H | -2.3986770 | -5.5255810 | -1.2473390 |   |           |            |            |
| H | 0.0810260  | -5.4871450 | -1.6791200 |   |           |            |            |
| H | 1.2453980  | -3.2679460 | -1.7640660 |   |           |            |            |
| N | 0.0730570  | -1.4036900 | 1.7349120  |   |           |            |            |
| C | -0.4772070 | -2.6093800 | 1.8927700  |   |           |            |            |
| C | -1.2392060 | -2.9566590 | 3.0068760  |   |           |            |            |
| C | -1.4457390 | -1.9973250 | 3.9958020  |   |           |            |            |
| C | -0.8793490 | -0.7363510 | 3.8333680  |   |           |            |            |

**Table S61.** Geometric coordinates and single point energies for NaHMDS disolvated Et<sub>2</sub>O dimer.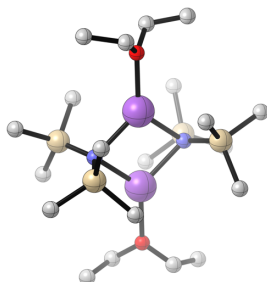

G = -2536.125652 Hartrees

G<sub>SP</sub> = -2537.851147 Hartrees

| Atom | X          | Y          | Z          | Atom | X          | Y          | Z          |
|------|------------|------------|------------|------|------------|------------|------------|
| Na   | -1.4500330 | -0.0002120 | -0.0014070 | H    | 5.2584730  | -2.0852410 | 0.7172080  |
| N    | 0.0000150  | -1.8251740 | -0.0007060 | H    | 3.7222350  | -2.6762420 | 0.0319310  |
| Na   | 1.4500510  | -0.0003040 | -0.0000820 | H    | 5.3690070  | -0.3436990 | -1.1366700 |
| N    | 0.0000100  | 1.8247590  | -0.0007400 | H    | 3.8356950  | -0.9629570 | -1.7793930 |
| Si   | -0.3060890 | 2.5654940  | 1.5056620  | Si   | -0.3057990 | -2.5656860 | -1.5073050 |
| C    | -1.0981500 | 4.2870050  | 1.4330400  | C    | -1.5000010 | -1.4592560 | -2.5012720 |
| H    | -1.4647980 | 4.5926010  | 2.4256490  | H    | -2.4865960 | -1.3961050 | -2.0097560 |
| H    | -0.3687080 | 5.0415480  | 1.1016760  | H    | -1.1017300 | -0.4354650 | -2.6131670 |
| H    | -1.9485150 | 4.3148100  | 0.7333990  | H    | -1.6658310 | -1.8485380 | -3.5173090 |
| C    | -1.5018530 | 1.4600350  | 2.4988530  | C    | -1.0999850 | -4.2861840 | -1.4348590 |
| H    | -2.4881170 | 1.3972310  | 2.0066410  | H    | -1.4660640 | -4.5917620 | -2.4276800 |
| H    | -1.1041210 | 0.4360740  | 2.6111300  | H    | -0.3720070 | -5.0416170 | -1.1023170 |
| H    | -1.6682300 | 1.8495230  | 3.5147250  | H    | -1.9511080 | -4.3121870 | -0.7360660 |
| C    | 1.2581900  | 2.7547770  | 2.5657700  | C    | 1.2589920  | -2.7566580 | -2.5663200 |
| H    | 1.7173590  | 1.7764740  | 2.7832620  | H    | 2.0018670  | -3.3701290 | -2.0308070 |
| H    | 2.0024650  | 3.3665980  | 2.0303010  | H    | 1.0503390  | -3.2448260 | -3.5312790 |
| H    | 1.0496140  | 3.2440440  | 3.5301890  | H    | 1.7199260  | -1.7789300 | -2.7826660 |
| Si   | 0.3069740  | 2.5652120  | -1.5071340 | Si   | 0.3049340  | -2.5659210 | 1.5059310  |
| C    | 1.5019790  | 1.4587510  | -2.5001160 | C    | 1.4999620  | -1.4605170 | 2.5000520  |
| H    | 2.4882130  | 1.3956370  | -2.0078730 | H    | 2.4865800  | -1.3977590 | 2.0085440  |

|   |            |            |            |   |            |            |            |
|---|------------|------------|------------|---|------------|------------|------------|
| H | 1.1038080  | 0.4349440  | -2.6122180 | H | 1.6655790  | -1.8500430 | 3.5160320  |
| H | 1.6685590  | 1.8479620  | -3.5160580 | H | 1.1021980  | -0.4365400 | 2.6120840  |
| C | -1.2569730 | 2.7561600  | -2.5673890 | C | -1.2601930 | -2.7551270 | 2.5648130  |
| H | -1.9998470 | 3.3705430  | -2.0329260 | H | -1.0526010 | -3.2452870 | 3.5289890  |
| H | -1.0473510 | 3.2434090  | -3.5326030 | H | -1.7188770 | -1.7767000 | 2.7827760  |
| H | -1.7183610 | 1.7785360  | -2.7832350 | H | -2.0044840 | -3.3660290 | 2.0283160  |
| C | 1.1009240  | 4.2858140  | -1.4342370 | C | 1.0971390  | -4.2873750 | 1.4338390  |
| H | 1.4676270  | 4.5913530  | -2.4268410 | H | 0.3680500  | -5.0420020 | 1.1018970  |
| H | 0.3725530  | 5.0411370  | -1.1023010 | H | 1.9479990  | -4.3149370 | 0.7347900  |
| H | 1.9515580  | 4.3121490  | -0.7348640 | H | 1.4631330  | -4.5929830 | 2.4266840  |
| O | 3.6753330  | -0.0002890 | 0.0009460  | O | -3.6753240 | -0.0007810 | -0.0015880 |
| C | 4.4256250  | 0.8418080  | 0.8624330  | C | -4.4252630 | 0.8458250  | -0.8589560 |
| H | 5.3659620  | 0.3376080  | 1.1447240  | H | -3.8366490 | 0.9623160  | -1.7816070 |
| H | 3.8324050  | 0.9622920  | 1.7816110  | H | -5.3703880 | 0.3475260  | -1.1356350 |
| C | 4.6864070  | 2.1890580  | 0.2169970  | C | -4.6736800 | 2.1948200  | -0.2122790 |
| H | 5.2452810  | 2.8448940  | 0.8989540  | H | -5.2318750 | 2.8543230  | -0.8912540 |
| H | 5.2681430  | 2.0790680  | -0.7100110 | H | -5.2510550 | 2.0887420  | 0.7179170  |
| H | 3.7316170  | 2.6756680  | -0.0302570 | H | -3.7143390 | 2.6751110  | 0.0297680  |
| C | 4.4259140  | -0.8447360 | -0.8579890 | C | -4.4262500 | -0.8408630 | 0.8613100  |
| C | 4.6796380  | -2.1930120 | -0.2118800 | H | -3.8313860 | -0.9633670 | 1.7791570  |
| H | 5.2385580  | -2.8507480 | -0.8919710 | H | -5.3644620 | -0.3339260 | 1.1457780  |
| H | -5.2757260 | -2.0751950 | -0.7096810 | C | -4.6924980 | -2.1871710 | 0.2161460  |
| H | -3.7397440 | -2.6767440 | -0.0330460 | H | -5.2521030 | -2.8413430 | 0.8990990  |

**Table S62.** Geometric coordinates and single point energies for NaHMDS disolvated MTBE dimer.

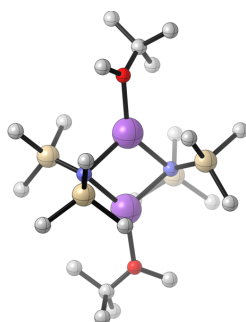

G = -2614.610773 Hartrees

G<sub>SP</sub> = -2616.424086 Hartrees

| Atom | X          | Y          | Z          | Atom | X          | Y          | Z          |
|------|------------|------------|------------|------|------------|------------|------------|
| Na   | -1.4433530 | -0.1752760 | -0.0241910 | Si   | 0.7975900  | -2.4548750 | 1.5279820  |
| N    | 0.2241610  | -1.8108020 | 0.0521650  | C    | 1.7061740  | -1.0858470 | 2.4973810  |
| Na   | 1.4425570  | 0.1778430  | -0.0251580 | H    | 2.6419180  | -0.7784860 | 2.0000320  |
| N    | -0.2243980 | 1.8130770  | 0.0515340  | H    | 1.9791570  | -1.4338230 | 3.5053340  |
| Si   | -0.7965060 | 2.4574130  | 1.5277250  | H    | 1.0810110  | -0.1856840 | 2.6249790  |
| C    | -2.0504610 | 3.8719140  | 1.3434880  | C    | -0.5752260 | -3.1028490 | 2.6650990  |
| H    | -2.3960470 | 4.2281650  | 2.3267700  | H    | -0.1695680 | -3.5215970 | 3.5993460  |
| H    | -1.6130010 | 4.7315660  | 0.8120280  | H    | -1.2784250 | -2.2987750 | 2.9362030  |
| H    | -2.9359200 | 3.5488410  | 0.7728250  | H    | -1.1455350 | -3.8981290 | 2.1585200  |
| C    | -1.7077890 | 1.0895910  | 2.4963820  | C    | 2.0541390  | -3.8669610 | 1.3424110  |
| H    | -2.6444600 | 0.7849160  | 1.9991240  | H    | 1.6179250  | -4.7269430 | 0.8104270  |
| H    | -1.0848670 | 0.1877170  | 2.6230670  | H    | 2.9388030  | -3.5419530 | 0.7715940  |
| H    | -1.9795240 | 1.4373470  | 3.5047450  | H    | 2.4007620  | -4.2234400 | 2.3252420  |
| C    | 0.5778110  | 3.1020940  | 2.6649230  | O    | -3.6034500 | -0.7769910 | 0.1528330  |
| H    | 1.2802000  | 2.2968260  | 2.9345870  | C    | -4.6892360 | 0.0039960  | -0.3761330 |
| H    | 1.1487680  | 3.8972230  | 2.1588110  | C    | -5.5782180 | -0.8522550 | -1.2754040 |
| H    | 0.1733760  | 3.5203460  | 3.5999180  | H    | -6.1452420 | -1.5985730 | -0.7009890 |
| Si   | 0.1769640  | 2.7293310  | -1.3342940 | H    | -6.3030000 | -0.2109580 | -1.7955410 |
| C    | 1.3973280  | 1.7292950  | -2.4085500 | H    | -4.9711610 | -1.3723450 | -2.0312890 |



|   |            |            |            |    |            |            |            |
|---|------------|------------|------------|----|------------|------------|------------|
| H | 2.3824020  | 1.6558840  | -1.9167060 | C  | -3.9945300 | 1.0888060  | -1.1910600 |
| H | 1.0321790  | 0.7064040  | -2.6120060 | H  | -3.2863630 | 1.6549580  | -0.5642840 |
| H | 1.5567710  | 2.2129720  | -3.3842240 | H  | -3.4391890 | 0.6386490  | -2.0277060 |
| C | -1.3034150 | 3.1385730  | -2.4443110 | H  | -4.7229310 | 1.8002120  | -1.6037260 |
| H | -2.0780330 | 3.6783560  | -1.8764160 | C  | -5.4911120 | 0.6225610  | 0.7673930  |
| H | -1.0076980 | 3.7674690  | -3.2986400 | H  | -5.9582360 | -0.1463180 | 1.3991580  |
| H | -1.7584950 | 2.2188550  | -2.8451460 | H  | -4.8422490 | 1.2490980  | 1.3961290  |
| C | 1.0609500  | 4.3683090  | -0.9647210 | H  | -6.2950410 | 1.2533680  | 0.3628360  |
| H | 1.3315660  | 4.8965400  | -1.8925180 | C  | -3.8944740 | -1.9948100 | 0.7979080  |
| H | 0.4292150  | 5.0445620  | -0.3677710 | H  | -4.6016020 | -1.8606980 | 1.6324300  |
| H | 1.9865390  | 4.1900600  | -0.3946290 | H  | -4.2974930 | -2.7418850 | 0.0954050  |
| O | 3.6038850  | 0.7758080  | 0.1508790  | H  | -2.9453590 | -2.3743950 | 1.2013830  |
| C | 3.8979140  | 1.9914600  | 0.7986440  | H  | 4.8333820  | -1.2569960 | 1.3935110  |
| H | 4.6005210  | 1.8529750  | 1.6362800  | Si | -0.1774270 | -2.7275240 | -1.3332890 |
| H | 4.3077490  | 2.7373710  | 0.0988840  | C  | -1.3984920 | -1.7281240 | -2.4073140 |
| H | 2.9488180  | 2.3752440  | 1.1981850  | H  | -2.3834370 | -1.6551090 | -1.9152010 |
| C | 4.6879190  | -0.0084090 | -0.3769690 | H  | -1.0337590 | -0.7050670 | -2.6107190 |
| C | 5.5816230  | 0.8457790  | -1.2735110 | H  | -1.5579020 | -2.2117300 | -3.3830250 |
| H | 6.1508610  | 1.5888670  | -0.6971040 | C  | -1.0603300 | -4.3668830 | -0.9627860 |
| H | 6.3045410  | 0.2024130  | -1.7936920 | H  | -1.3309320 | -4.8957230 | -1.8902370 |
| H | 4.9776920  | 1.3695130  | -2.0293900 | H  | -0.4278420 | -5.0424090 | -0.3657880 |
| C | 3.9908590  | -1.0896690 | -1.1945720 | H  | -1.9857830 | -4.1890600 | -0.3923540 |
| H | 3.2786130  | -1.6533190 | -0.5701480 | C  | 1.3023600  | -3.1368960 | -2.4441000 |
| H | 3.4395360  | -0.6365410 | -2.0322710 | H  | 2.0774500  | -3.6763960 | -1.8765770 |
| H | 4.7173200  | -1.8038650 | -1.6058530 | H  | 1.0059220  | -3.7663180 | -3.2977990 |
| C | 5.4854390  | -0.6312840 | 0.7672560  | H  | 1.7570950  | -2.2174270 | -2.8458750 |
| H | 6.2883680  | -1.2637960 | 0.3633720  | H  | 5.9534660  | 0.1351660  | 1.4013120  |

**Table S63.** Geometric coordinates and single point energies for NaHMDS trisolvated MTBE monomer.

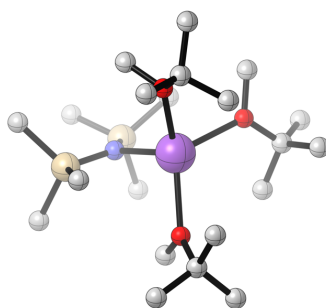

G = -1852.25893 Hartrees

G<sub>SP</sub> = -1853.793235 Hartrees

| Atom | X          | Y          | Z          | Atom | X          | Y          | Z         |
|------|------------|------------|------------|------|------------|------------|-----------|
| Si   | -2.7373720 | 0.1223940  | 1.2572650  | H    | -1.0157300 | 2.4006650  | 0.5074600 |
| N    | -1.9239530 | 0.2649910  | -0.2249920 | H    | -0.5695740 | 3.1834480  | 2.0580010 |
| Si   | -2.6082040 | 0.3747730  | -1.7730880 | C    | 2.0383360  | 2.4833830  | 1.8421600 |
| C    | -2.8736570 | -1.3235710 | -2.5987650 | C    | 2.4015550  | 3.9458710  | 1.5840710 |
| H    | -3.3559070 | -1.2311960 | -3.5849450 | H    | 2.5243900  | 4.1306560  | 0.5063270 |
| H    | -1.9187140 | -1.8556920 | -2.7430400 | H    | 3.3519420  | 4.1810040  | 2.0827670 |
| H    | -3.5137790 | -1.9605860 | -1.9667940 | H    | 1.6391200  | 4.6337490  | 1.9745320 |
| C    | -1.4541550 | 1.3338860  | -2.9400800 | C    | 3.1716690  | 1.5777090  | 1.3741810 |
| H    | -0.4614050 | 0.8564720  | -2.9459760 | H    | 4.0862330  | 1.7707210  | 1.9520420 |
| H    | -1.8317250 | 1.3668600  | -3.9742210 | H    | 2.8945840  | 0.5239930  | 1.5136640 |
| H    | -1.3236840 | 2.3700110  | -2.5865530 | H    | 3.3819240  | 1.7417540  | 0.3079790 |
| C    | -4.2953120 | 1.2456170  | -1.8492010 | C    | 1.7458040  | 2.2476430  | 3.3237010 |
| H    | -5.0504510 | 0.7010040  | -1.2591980 | H    | 1.5150650  | 1.1874560  | 3.5019520 |
| H    | -4.2270900 | 2.2664120  | -1.4411180 | H    | 2.6161500  | 2.5264800  | 3.9347360 |
| H    | -4.6656160 | 1.3151570  | -2.8843770 | H    | 0.8894010  | 2.8467620  | 3.6646090 |
| Na   | 0.3253520  | 0.0493940  | 0.0659480  | O    | 0.4122760  | -2.2756160 | 0.6836320 |
| O    | 1.7313440  | 0.6251330  | -1.7231470 | C    | 1.2747670  | -3.0870470 | 1.4919630 |
| C    | 2.3481970  | -0.3315950 | -2.6036060 | C    | 0.5184730  | -3.6462440 | 2.6983040 |
| C    | 2.2376960  | 0.0932400  | -4.0676410 | H    | 0.0427110  | -2.8328700 | 3.2637340 |
| H    | 1.1922010  | 0.3056370  | -4.3336740 | H    | 1.2183070  | -4.1719730 | 3.3632030 |

|   |            |            |            |   |            |            |            |
|---|------------|------------|------------|---|------------|------------|------------|
| H | 2.5973330  | -0.7241470 | -4.7076170 | H | -0.2564250 | -4.3656930 | 2.4007470  |
| H | 2.8464480  | 0.9813160  | -4.2874250 | C | 2.3580840  | -2.1240120 | 1.9584150  |
| C | 1.5678890  | -1.6193700 | -2.3752900 | H | 3.0829630  | -2.6297570 | 2.6108530  |
| H | 1.9725900  | -2.4363360 | -2.9893830 | H | 2.8968660  | -1.7135890 | 1.0904790  |
| H | 1.6230860  | -1.9183970 | -1.3187160 | H | 1.9009630  | -1.2951990 | 2.5206710  |
| H | 0.5087740  | -1.4706060 | -2.6379450 | C | 1.8869050  | -4.2192730 | 0.6664850  |
| C | 3.8098820  | -0.5021310 | -2.1916570 | H | 2.3871180  | -3.8217280 | -0.2291030 |
| H | 3.8701880  | -0.8274310 | -1.1425630 | H | 2.6320880  | -4.7582010 | 1.2682170  |
| H | 4.3044620  | -1.2552120 | -2.8215310 | H | 1.1257390  | -4.9457210 | 0.3492390  |
| H | 4.3670180  | 0.4407240  | -2.2954550 | C | -0.6507490 | -2.9213020 | 0.0081570  |
| C | 1.9428590  | 1.9894780  | -2.0041850 | H | -0.2824340 | -3.5201960 | -0.8422860 |
| H | 1.5387800  | 2.5484930  | -1.1520810 | H | -1.3160210 | -2.1256140 | -0.3576390 |
| H | 1.4141120  | 2.3008450  | -2.9181060 | H | -1.2242050 | -3.5728520 | 0.6857240  |
| H | 3.0168820  | 2.2248500  | -2.1076720 | C | -3.9143910 | -1.3675340 | 1.3826830  |
| O | 0.9042220  | 2.0841640  | 1.0590320  | H | -3.3828360 | -2.3152840 | 1.2039940  |
| C | -0.2205650 | 2.9442940  | 1.0394910  | H | -4.3966000 | -1.4281540 | 2.3713950  |
| H | 0.0033120  | 3.8828760  | 0.5065620  | H | -4.7114560 | -1.2889230 | 0.6254840  |
| H | -0.7854730 | 0.7897030  | 2.7008700  | C | -1.4464640 | -0.0911910 | 2.6445770  |
| C | -3.7879670 | 1.6279420  | 1.7556010  | H | -1.9129590 | -0.2255390 | 3.6329400  |
| H | -3.1899630 | 2.5528100  | 1.7567610  | H | -0.8211510 | -0.9745690 | 2.4364090  |
| H | -4.6214510 | 1.7738480  | 1.0516260  |   |            |            |            |
| H | -4.2151150 | 1.4989460  | 2.7631480  |   |            |            |            |

**Table S64.** Geometric coordinates and single point energies for NaHMDS disolvated 1,4-dioxane dimer.

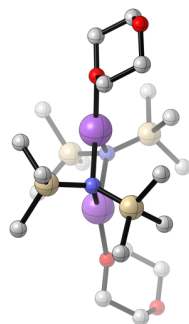

G = -2684.014117 Hartrees

G<sub>SP</sub> = -2685.913388 Hartrees

| Atom | X          | Y          | Z          | Atom | X          | Y          | Z          |
|------|------------|------------|------------|------|------------|------------|------------|
| Na   | -1.3707820 | -0.4811800 | 0.3953470  | H    | 3.3252690  | -1.2696570 | -0.3247720 |
| N    | 0.6066370  | -1.7173920 | 0.2881920  | H    | 4.8842750  | -0.9108960 | 0.4975870  |
| Na   | 1.3711110  | 0.4819420  | 0.3954630  | H    | 4.0782180  | -0.0409110 | -2.3388850 |
| N    | -0.6063920 | 1.7181060  | 0.2881260  | H    | 5.3325000  | -1.2487780 | -1.9212250 |
| Si   | -1.1648180 | 2.3760010  | 1.7641190  | H    | 5.3042640  | 1.4459210  | 1.0696430  |
| C    | -2.5543860 | 3.6575490  | 1.6042740  | H    | 4.0358930  | 2.6263360  | 0.6024650  |
| H    | -2.8872920 | 4.0047880  | 2.5949840  | Si   | 0.3376470  | -2.5600530 | -1.1731650 |
| H    | -2.2252770 | 4.5407430  | 1.0357600  | C    | -1.0656680 | -1.7028700 | -2.1461170 |
| H    | -3.4299500 | 3.2358360  | 1.0861890  | H    | -2.0419990 | -1.8607610 | -1.6554940 |
| C    | -1.8779400 | 0.9653300  | 2.8306330  | H    | -0.9105000 | -0.6153650 | -2.2509540 |
| H    | -2.7779040 | 0.5216180  | 2.3710140  | H    | -1.1525750 | -2.1168280 | -3.1623740 |
| H    | -1.1426500 | 0.1584590  | 2.9969750  | C    | -0.2489080 | -4.3521120 | -0.9673230 |
| H    | -2.1729140 | 1.3321510  | 3.8254790  | H    | -0.4407710 | -4.8236530 | -1.9440190 |
| C    | 0.2178570  | 3.1855630  | 2.7783450  | H    | 0.4918080  | -4.9705270 | -0.4377960 |
| H    | 1.0386100  | 2.4736470  | 2.9678790  | H    | -1.1849610 | -4.3855320 | -0.3867910 |
| H    | 0.6381520  | 4.0420880  | 2.2277650  | C    | 1.8546540  | -2.5984650 | -2.3106820 |
| H    | -0.1386440 | 3.5519030  | 3.7535780  | H    | 2.6880410  | -3.1253440 | -1.8173050 |
| Si   | -0.3376420 | 2.5603520  | -1.1735000 | H    | 1.6444140  | -3.1167830 | -3.2589400 |
| C    | 1.0667180  | 1.7039010  | -2.1456330 | H    | 2.1917110  | -1.5774410 | -2.5531780 |

|   |            |            |            |    |            |            |            |
|---|------------|------------|------------|----|------------|------------|------------|
| H | 2.0427160  | 1.8628640  | -1.6546970 | Si | 1.1645470  | -2.3753500 | 1.7643630  |
| H | 0.9125830  | 0.6162070  | -2.2501480 | C  | 1.8777910  | -0.9648170 | 2.8309590  |
| H | 1.1536380  | 2.1175460  | -3.1620170 | H  | 2.7778960  | -0.5213110 | 2.3714220  |
| C | -1.8543310 | 2.5970110  | -2.3115090 | H  | 2.1725660  | -1.3316690 | 3.8258520  |
| H | -2.6881560 | 3.1237980  | -1.8187670 | H  | 1.1426420  | -0.1577920 | 2.9971790  |
| H | -1.6441030 | 3.1147690  | -3.2600750 | C  | -0.2185950 | -3.1845320 | 2.7782740  |
| H | -2.1907610 | 1.5756300  | -2.5533700 | H  | 0.1375380  | -3.5508180 | 3.7536610  |
| C | 0.2473250  | 4.3530010  | -0.9683850 | H  | -1.0392790 | -2.4724430 | 2.9674720  |
| H | 0.4394000  | 4.8240900  | -1.9452560 | H  | -0.6388790 | -4.0410450 | 2.2276680  |
| H | -0.4942560 | 4.9711140  | -0.4397220 | C  | 2.5538040  | -3.6572810 | 1.6048550  |
| H | 1.1829830  | 4.3875640  | -0.3872860 | H  | 2.2247540  | -4.5401500 | 1.0357960  |
| O | 3.5923520  | 0.6792670  | 0.2088110  | H  | 3.4298020  | -3.2356380 | 1.0874470  |
| C | 4.5616300  | 1.7113090  | 0.2961050  | H  | 2.8860270  | -4.0050070 | 2.5956220  |
| C | 5.2538990  | 1.8889990  | -1.0449080 | O  | -3.5918310 | -0.6796450 | 0.2084260  |
| H | 4.5227000  | 2.2555980  | -1.7916080 | C  | -4.5606660 | -1.7120620 | 0.2962170  |
| H | 6.0663050  | 2.6235170  | -0.9630800 | C  | -5.2532170 | -1.8902880 | -1.0445750 |
| O | 5.8171370  | 0.6745510  | -1.4725290 | H  | -4.5220580 | -2.2567240 | -1.7913950 |
| C | 4.8359770  | -0.3292330 | -1.5841880 | H  | -6.0653020 | -2.6251220 | -0.9624070 |
| C | 4.1529790  | -0.5480210 | -0.2475430 | O  | -5.8170700 | -0.6761460 | -1.4722630 |
| H | -4.0787260 | 0.0399250  | -2.3392800 | C  | -4.8363730 | 0.3280360  | -1.5843940 |
| H | -5.3334040 | 1.2473090  | -1.9214260 | C  | -4.1530620 | 0.5473380  | -0.2479920 |
| H | -5.3031900 | -1.4468080 | 1.0699050  | H  | -3.3256510 | 1.2692770  | -0.3256050 |
| H | -4.0344670 | -2.6268050 | 0.6026240  | H  | -4.8842660 | 0.9100880  | 0.4972890  |

**Table S65** Geometric coordinates and single point energies for NaHMDS tetrasolvated 1,4-dioxane dimer.

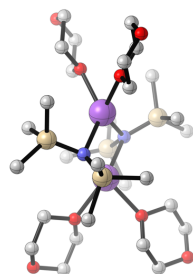

G = -3298.392461 Hartrees

G<sub>SP</sub> = -3301.000578 Hartrees

| Atom | X          | Y          | Z          | Atom | X          | Y          | Z         |
|------|------------|------------|------------|------|------------|------------|-----------|
| Si   | 0.7553370  | -2.7621160 | 1.2851670  | H    | -0.2809900 | -5.0577840 | 1.1252730 |
| N    | -0.0005390 | -1.9158720 | 0.0000310  | H    | 0.4598260  | -4.7888990 | 2.7164770 |
| Na   | -1.4480080 | 0.0002580  | 0.0000410  | C    | 4.3077290  | -0.1642070 | 1.7281560 |
| Na   | 1.4476780  | -0.0001920 | -0.0001530 | O    | 3.2200890  | 0.6445490  | 1.3126900 |
| N    | 0.0005870  | 1.9157590  | 0.0001590  | C    | 2.9345170  | 1.6737960  | 2.2510300 |
| Si   | -0.7553360 | 2.7604130  | 1.2863370  | C    | 4.1740230  | 2.5145690  | 2.4909420 |
| C    | -0.9725800 | 1.6177460  | 2.7867180  | H    | 4.4503700  | 3.0375610  | 1.5547840 |
| H    | -1.5453840 | 0.7098990  | 2.5352080  | H    | 3.9852000  | 3.2656810  | 3.2694560 |
| H    | -1.5113950 | 2.1313420  | 3.5987130  | O    | 5.2391550  | 1.7032130  | 2.9296550 |
| H    | 0.0019530  | 1.2899690  | 3.1806640  | C    | 5.5294330  | 0.7001670  | 1.9909560 |
| C    | 0.1401870  | 4.3117980  | 1.9274470  | H    | 5.8693800  | 1.1574940  | 1.0393410 |
| H    | -0.4610660 | 4.7860380  | 2.7192590  | H    | 6.3501540  | 0.0917940  | 2.3944990 |
| H    | 1.1315310  | 4.0942740  | 2.3540570  | H    | 2.6042280  | 1.2171880  | 3.2030310 |
| H    | 0.2798640  | 5.0564500  | 1.1285060  | H    | 2.1118930  | 2.2622920  | 1.8228050 |
| C    | -2.5010540 | 3.3550680  | 0.8189060  | H    | 4.4915180  | -0.8887000 | 0.9228110 |
| H    | -2.4503920 | 4.1103590  | 0.0174420  | H    | 4.0268870  | -0.7129150 | 2.6464590 |
| H    | -3.1020480 | 2.5120100  | 0.4419300  | H    | -2.1148970 | -2.2672240 | 1.8165420 |
| H    | -3.0314330 | 3.8024740  | 1.6745320  | C    | -2.9359330 | -1.6783420 | 2.2472140 |
| Si   | 0.7568600  | 2.7621880  | -1.2846170 | O    | -3.2209740 | -0.6467240 | 1.3112980 |
| C    | 0.9741130  | 1.6214490  | -2.7864710 | C    | -4.3071400 | 0.1626930  | 1.7292690 |

|    |            |            |            |   |            |            |            |
|----|------------|------------|------------|---|------------|------------|------------|
| H  | 1.5448360  | 0.7121630  | -2.5355140 | C | -5.5297880 | -0.7004930 | 1.9915800  |
| H  | -0.0007480 | 1.2959470  | -3.1815700 | O | -5.2399970 | -1.7057410 | 2.9280650  |
| H  | 1.5144550  | 2.1350440  | -3.5974320 | C | -4.1764500 | -2.5177200 | 2.4867260  |
| C  | 2.5024630  | 3.3560430  | -0.8157560 | H | -4.4544510 | -3.0384480 | 1.5497760  |
| H  | 3.0332290  | 3.8043680  | -1.6706720 | H | -3.9879300 | -3.2706720 | 3.2635330  |
| H  | 2.4516460  | 4.1104250  | -0.0134420 | H | -5.8712680 | -1.1555170 | 1.0394070  |
| H  | 3.1031850  | 2.5124410  | -0.4395820 | H | -6.3492850 | -0.0917700 | 2.3970650  |
| C  | -0.1387780 | 4.3141390  | -1.9240500 | H | -4.4907330 | 0.8889000  | 0.9254080  |
| H  | -0.2786620 | 5.0581280  | -1.1245440 | H | -4.0247480 | 0.7094030  | 2.6482930  |
| H  | 0.4620450  | 4.7891320  | -2.7157320 | H | -2.6036650 | -1.2242510 | 3.1997280  |
| H  | -1.1300250 | 4.0960820  | -2.3505630 | C | -4.3080610 | -0.1616660 | -1.7275480 |
| Si | -0.7553770 | -2.7602010 | -1.2869070 | O | -3.2204280 | 0.6471560  | -1.3121530 |
| C  | -0.9708630 | -1.6176310 | -2.7876140 | C | -2.9353650 | 1.6769990  | -2.2499740 |
| H  | -1.5441970 | -0.7098080 | -2.5372330 | C | -4.1752290 | 2.5174080  | -2.4893860 |
| H  | 0.0043280  | -1.2897020 | -3.1798590 | H | -4.4515400 | 3.0399970  | -1.5529830 |
| H  | -1.5080680 | -2.1314340 | -3.6005200 | H | -3.9867910 | 3.2688560  | -3.2676690 |
| C  | 0.1397990  | -4.3122750 | -1.9268480 | O | -5.2402020 | 1.7059090  | -2.9281330 |
| H  | 0.2771660  | -5.0571710 | -1.1277230 | C | -5.5300120 | 0.7025360  | -1.9896340 |
| H  | -0.4609550 | -4.7856920 | -2.7195540 | H | -5.8696960 | 1.1595220  | -1.0377630 |
| H  | 1.1321090  | -4.0963490 | -2.3519850 | H | -6.3507780 | 0.0941630  | -2.3930800 |
| C  | -2.5016020 | -3.3545930 | -0.8209550 | H | -2.6047660 | 1.2210760  | -3.2021870 |
| H  | -3.0313300 | -3.8022120 | -1.6768720 | H | -2.1131400 | 2.2658160  | -1.8214340 |
| H  | -2.4515350 | -4.1097250 | -0.0192870 | H | -4.4913500 | -0.8863970 | -0.9223140 |
| H  | -3.1029920 | -2.5115250 | -0.4446380 | H | -4.0275210 | -0.7100500 | -2.6461460 |
| C  | 2.5010740  | -3.3560240 | 0.8169050  | C | 4.3075950  | 0.1636610  | -1.7275980 |
| H  | 3.0317840  | -3.8039700 | 1.6720510  | O | 3.2203410  | -0.6456280 | -1.3121470 |
| H  | 2.4504960  | -4.1106740 | 0.0148310  | C | 2.9352110  | -1.6748140 | -2.2506270 |
| H  | 3.1017370  | -2.5124600 | 0.4405190  | C | 4.1750450  | -2.5151080 | -2.4904930 |
| C  | 0.9724130  | -1.6212540 | 2.7868870  | H | 4.4515220  | -3.0379850 | -1.5542910 |
| H  | 1.5447510  | -0.7129550 | 2.5360180  | H | 3.9865600  | -3.2663080 | -3.2690010 |
| H  | -0.0022040 | -1.2942400 | 3.1812740  | O | 5.2398820  | -1.7033510 | -2.9291480 |

|   |            |            |            |   |           |            |            |
|---|------------|------------|------------|---|-----------|------------|------------|
| H | 1.5115670  | -2.1354070 | 3.5982980  | C | 5.5296820 | -0.7001380 | -1.9905020 |
| C | -0.1407530 | -4.3137810 | 1.9246940  | H | 5.8698900 | -1.1572610 | -1.0388780 |
| H | -1.1318710 | -4.0950080 | 2.3511420  | H | 6.3500860 | -0.0913660 | -2.3940880 |
| H | 2.1127870  | -2.2637880 | -1.8226870 | H | 2.6048390 | -1.2182250 | -3.2026110 |
| H | 4.4911830  | 0.8881190  | -0.9221850 |   |           |            |            |
| H | 4.0263730  | 0.7123590  | -2.6457680 |   |           |            |            |



**Table S66.** Geometric coordinates and single point energies for NaHMDS trisolvated monomer with 3 1,4-dioxane.

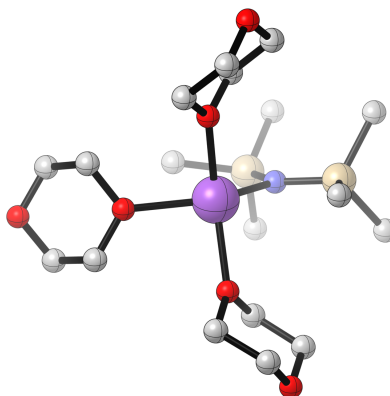

**G** = -1956.372468 Hartrees

**G<sub>SP</sub>** = -1958.034321 Hartrees

| Atom | X          | Y          | Z          | Atom | X          | Y          | Z          |
|------|------------|------------|------------|------|------------|------------|------------|
| Si   | 2.8447250  | 0.2469980  | -0.0088110 | H    | 1.0119880  | -2.2965960 | -0.5546940 |
| N    | 1.4386920  | 0.1531010  | -0.9415870 | H    | 2.2104250  | -4.3954060 | 0.3151990  |
| Si   | 1.1463650  | 0.2374380  | -2.6047710 | H    | 2.3085420  | -2.9899590 | 1.4150160  |
| C    | 2.0495170  | 1.6425310  | -3.5067410 | H    | -1.5174270 | -3.7938500 | 1.6138840  |
| H    | 1.7366600  | 1.7236730  | -4.5597410 | H    | -1.4277080 | -2.3618950 | 2.6932080  |
| H    | 1.8614410  | 2.6117740  | -3.0177100 | O    | -0.7194430 | 2.0765170  | 1.0541430  |
| H    | 3.1380610  | 1.4721970  | -3.4931080 | C    | 0.0350850  | 3.0540490  | 0.3384540  |
| C    | -0.7228380 | 0.5229890  | -2.8583170 | C    | 0.8424740  | 3.8955070  | 1.3086630  |
| H    | -1.0408290 | 1.4504830  | -2.3499900 | H    | 1.3537620  | 4.7088860  | 0.7768490  |
| H    | -1.0111840 | 0.6015820  | -3.9181730 | H    | 1.6081840  | 3.2628710  | 1.7969030  |
| H    | -1.2913790 | -0.3136730 | -2.4171670 | O    | 0.0043490  | 4.4798040  | 2.2810640  |
| C    | 1.5608020  | -1.3580260 | -3.5504850 | C    | -0.6957240 | 3.4966390  | 2.9968320  |
| H    | 2.6250750  | -1.6137770 | -3.4261360 | C    | -1.5389070 | 2.6599160  | 2.0495900  |
| H    | 0.9690120  | -2.2055870 | -3.1681240 | H    | -2.2992890 | 3.3056200  | 1.5706690  |
| H    | 1.3579800  | -1.2662050 | -4.6293110 | H    | -2.0490540 | 1.8406970  | 2.5765800  |
| Na   | -0.3930820 | -0.0597720 | 0.3463490  | H    | -1.3324060 | 4.0064120  | 3.7327920  |
| O    | -0.2833460 | -2.2470120 | 1.0138290  | H    | 0.0103350  | 2.8357460  | 3.5373210  |

|   |            |            |            |   |            |            |            |
|---|------------|------------|------------|---|------------|------------|------------|
| C | -0.8412880 | -3.0338350 | 2.0499950  | H | -0.6637090 | 3.6995550  | -0.2261600 |
| C | 0.2563870  | -3.7357500 | 2.8312510  | H | 0.6797470  | 2.4961660  | -0.3580560 |
| H | -0.1777260 | -4.3975000 | 3.5932240  | O | -2.6480080 | -0.2317550 | 0.0481390  |
| H | 0.8870910  | -2.9791600 | 3.3381000  | C | -3.3834970 | -1.4447910 | 0.0508160  |
| O | 1.0338120  | -4.5239250 | 1.9694610  | C | -4.1529080 | -1.6017250 | -1.2488910 |
| C | 1.6228120  | -3.7310720 | 0.9626660  | H | -4.7833390 | -2.5005290 | -1.2146070 |
| C | 0.5616320  | -3.0112160 | 0.1515670  | H | -3.4399510 | -1.7022720 | -2.0898930 |
| H | -0.0589770 | -3.7471620 | -0.3928960 | O | -4.9950820 | -0.4953860 | -1.4529940 |
| H | -2.8029600 | 1.7645260  | -0.2828110 | C | -4.2464440 | 0.6955480  | -1.5102050 |
| H | -4.9504290 | 1.5244310  | -1.6632360 | C | -3.4704760 | 0.8945670  | -0.2198870 |
| H | -3.5402030 | 0.6657790  | -2.3604230 | H | -4.1755290 | 1.0365670  | 0.6208690  |
| H | -4.0912580 | -1.4414470 | 0.9008410  |   |            |            |            |
| H | -2.6548810 | -2.2548240 | 0.1862270  |   |            |            |            |
| C | 3.8100420  | 1.8775740  | -0.1714440 |   |            |            |            |
| H | 3.1701050  | 2.7518230  | 0.0281240  |   |            |            |            |
| H | 4.6635750  | 1.9178200  | 0.5240370  |   |            |            |            |
| H | 4.2030850  | 1.9898960  | -1.1939710 |   |            |            |            |
| C | 2.3443580  | 0.1097160  | 1.8294760  |   |            |            |            |
| H | 3.2073850  | 0.1448220  | 2.5120160  |   |            |            |            |
| H | 1.6699710  | 0.9408380  | 2.1000970  |   |            |            |            |
| H | 1.8011590  | -0.8311990 | 2.0198270  |   |            |            |            |
| C | 4.1206680  | -1.1188010 | -0.3581470 |   |            |            |            |
| H | 3.6643960  | -2.1210810 | -0.3379590 |   |            |            |            |
| H | 4.5434650  | -0.9776290 | -1.3662020 |   |            |            |            |
| H | 4.9561620  | -1.1075890 | 0.3596990  |   |            |            |            |

**Table S67.** Geometric coordinates and single point energies for NaHMDS tetrasolvated monomer with four 1,4-dioxane.

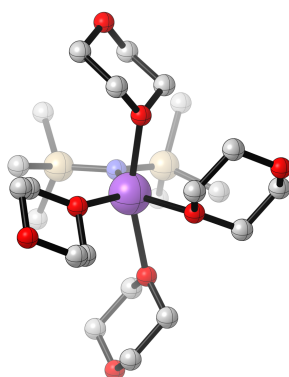

**G** = -2263.560388 Hartrees

**G<sub>SP</sub>** = -2265.576913 Hartrees

| Atom | X          | Y          | Z          | Atom | X          | Y          | Z          |
|------|------------|------------|------------|------|------------|------------|------------|
| Na   | 0.1379700  | -0.0711340 | -0.0513110 | C    | 1.2668190  | -4.4568020 | -0.1095780 |
| N    | -2.1502000 | 0.1134270  | 0.1806310  | C    | 1.0395830  | -3.3239270 | -1.0987110 |
| Si   | -2.7325440 | 0.0667450  | 1.7726150  | H    | 0.6462820  | -3.7369630 | -2.0472420 |
| C    | -3.4534610 | -1.6134180 | 2.3143110  | H    | 1.9728070  | -2.7838570 | -1.3126750 |
| H    | -2.6762220 | -2.3951620 | 2.3270160  | H    | 1.9246420  | -5.2219710 | -0.5445480 |
| H    | -3.8763730 | -1.5556850 | 3.3299840  | H    | 1.7550250  | -4.0506030 | 0.7988590  |
| H    | -4.2527920 | -1.9460100 | 1.6342060  | H    | -1.5515250 | -3.4552660 | -1.1821060 |
| C    | -1.2799430 | 0.3638940  | 2.9636610  | H    | -1.7853570 | -2.2505830 | 0.1317860  |
| H    | -1.5777180 | 0.3286590  | 4.0228960  | O    | 1.8088180  | -0.2255750 | -1.6877160 |
| H    | -0.5124330 | -0.4126750 | 2.8020870  | C    | 2.9461270  | 0.6121020  | -1.5700730 |
| H    | -0.8185870 | 1.3454200  | 2.7692700  | C    | 2.8817020  | 1.7447540  | -2.5789690 |
| C    | -4.0761290 | 1.3466080  | 2.1794980  | H    | 3.8018910  | 2.3440510  | -2.5460860 |
| H    | -3.7418450 | 2.3719740  | 1.9559660  | H    | 2.0205950  | 2.3921820  | -2.3283000 |
| H    | -4.9795450 | 1.1562600  | 1.5771850  | O    | 2.7502480  | 1.2354400  | -3.8829100 |
| H    | -4.3688330 | 1.3077840  | 3.2406660  | C    | 1.5920470  | 0.4442220  | -3.9937810 |
| Si   | -3.0869560 | 0.0565250  | -1.2312630 | C    | 1.6434110  | -0.7115710 | -3.0105360 |
| C    | -4.5152880 | -1.1993320 | -1.2057210 | H    | 2.4939030  | -1.3717990 | -3.2671710 |

|   |            |            |            |   |            |            |            |
|---|------------|------------|------------|---|------------|------------|------------|
| H | -5.0347750 | -1.2381020 | -2.1763300 | H | 0.7115480  | -1.2921510 | -3.0224740 |
| H | -4.1570180 | -2.2145210 | -0.9712090 | H | 1.5388520  | 0.0706580  | -5.0250360 |
| H | -5.2596290 | -0.9264910 | -0.4399830 | H | 0.6912120  | 1.0570000  | -3.7958200 |
| C | -1.9794040 | -0.4389530 | -2.7028690 | H | 3.8594320  | 0.0107040  | -1.7477800 |
| H | -1.5476170 | -1.4386350 | -2.5311830 | H | 2.9517630  | 0.9902690  | -0.5388680 |
| H | -2.5307070 | -0.4583200 | -3.6556980 | O | 1.9733090  | -0.0543190 | 1.4893070  |
| H | -1.1425510 | 0.2707800  | -2.8175810 | C | 2.1167900  | 0.4609260  | 2.8048750  |
| C | -3.8989660 | 1.7077380  | -1.7231640 | C | 3.5761790  | 0.7680630  | 3.0872860  |
| H | -4.4884320 | 2.1079270  | -0.8829070 | H | 3.7046530  | 1.1071340  | 4.1237720  |
| H | -3.1595660 | 2.4744300  | -2.0040500 | H | 3.9262170  | 1.5737940  | 2.4098760  |
| H | -4.5777890 | 1.5775290  | -2.5811280 | O | 4.3649270  | -0.3825380 | 2.9143020  |
| O | 0.6501460  | 2.2007600  | -0.2554230 | C | 4.2332910  | -0.8937280 | 1.6123580  |
| C | 1.4282240  | 3.1234090  | 0.4784580  | C | 2.7791990  | -1.2069040 | 1.3017770  |
| C | 0.5503450  | 3.9106480  | 1.4387620  | H | 2.4222710  | -2.0127910 | 1.9695480  |
| H | 1.1378130  | 4.6855510  | 1.9508290  | H | 2.6477010  | -1.5165600 | 0.2561150  |
| H | 0.1346320  | 3.2219280  | 2.2007210  | H | 4.8441320  | -1.8043290 | 1.5488720  |
| O | -0.4877100 | 4.5478650  | 0.7453820  | H | 4.6188760  | -0.1618150 | 0.8751840  |
| C | -1.2723150 | 3.6156370  | 0.0293070  | H | 1.7446930  | -0.2798170 | 3.5345510  |
| C | -0.4067600 | 2.8511680  | -0.9517200 | H | 1.4879350  | 1.3576590  | 2.8764900  |
| H | 0.0258310  | 3.5418030  | -1.7010380 | C | -0.8707200 | -4.1448390 | 0.7412490  |
| H | -0.9896320 | 2.0711610  | -1.4562200 | H | -1.8014760 | -4.6855640 | 0.9575620  |
| H | -2.0569400 | 4.1772100  | -0.4942160 | H | -0.4895080 | -3.7114510 | 1.6877920  |
| H | -1.7487270 | 2.8845790  | 0.7090250  | O | 0.0555080  | -5.0774740 | 0.2279290  |
| H | 1.9269710  | 3.8227980  | -0.2208130 |   |            |            |            |
| H | 2.1965480  | 2.5460840  | 1.0134360  |   |            |            |            |
| O | 0.1162860  | -2.3909920 | -0.5749280 |   |            |            |            |
| C | -1.1184250 | -3.0324990 | -0.2563730 |   |            |            |            |

**Table S68.** Geometric coordinates and single point energies for NaHMDS dimer with 1 THF and 1 toluene.

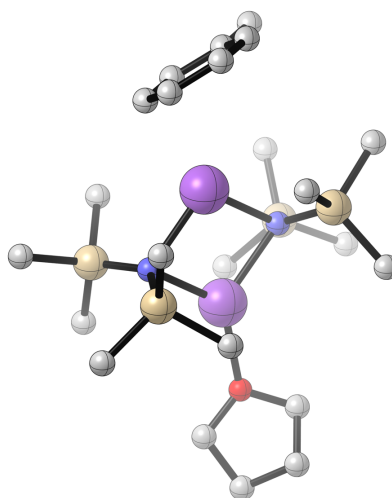

**G** = -2572.819764 Hartrees

**G<sub>SP</sub>** = -2572.158453 Hartrees

| Atom | X          | Y          | Z          | Atom | X          | Y         | Z          |
|------|------------|------------|------------|------|------------|-----------|------------|
| N    | 0.5757890  | 1.8175990  | 0.1670690  | H    | 2.3458790  | 2.5400290 | 3.6114050  |
| Na   | -1.3032570 | 0.4768320  | 0.0643620  | H    | 2.4889610  | 1.0438810 | 2.6638700  |
| Na   | 1.5079220  | -0.3178060 | 0.2366070  | Si   | 1.1266060  | 2.4192230 | -1.3303500 |
| N    | -0.3864080 | -1.6627080 | 0.1025330  | C    | 1.9662830  | 1.0005690 | -2.3002630 |
| Si   | -1.0054930 | -2.2566180 | -1.3765980 | H    | 2.9070080  | 0.6991140 | -1.8074760 |
| C    | -2.5023840 | -3.4067140 | -1.1888680 | H    | 2.2210630  | 1.3042000 | -3.3272210 |
| H    | -2.8880060 | -3.7352860 | -2.1667270 | H    | 1.3238090  | 0.1061340 | -2.3778940 |
| H    | -2.2603740 | -4.3071390 | -0.6029540 | C    | -0.2862280 | 3.0805640 | -2.4079050 |
| H    | -3.3136590 | -2.8759180 | -0.6640830 | H    | 0.0644190  | 3.4314730 | -3.3910540 |
| C    | -1.6331420 | -0.7900090 | -2.4196560 | H    | -1.0612090 | 2.3155630 | -2.5789120 |
| H    | -2.5257940 | -0.3181380 | -1.9719640 | H    | -0.7643070 | 3.9307590 | -1.8939160 |
| H    | -0.8619140 | -0.0150370 | -2.5623830 | C    | 2.4207220  | 3.8013580 | -1.2338470 |
| H    | -1.9386700 | -1.1243990 | -3.4230690 | H    | 1.9759570  | 4.7361080 | -0.8602520 |
| C    | 0.2874860  | -3.1515130 | -2.4362800 | H    | 3.2467540  | 3.5294270 | -0.5570240 |
| H    | 1.0958080  | -2.4593670 | -2.7247260 | H    | 2.8496840  | 4.0100430 | -2.2266400 |

|    |            |            |            |    |            |            |            |
|----|------------|------------|------------|----|------------|------------|------------|
| H  | 0.7378930  | -3.9845250 | -1.8741730 | C  | -4.6684750 | 1.3573320  | -1.7712860 |
| H  | -0.1470410 | -3.5599900 | -3.3619400 | C  | -3.8673110 | 2.3290510  | -1.1750290 |
| Si | -0.1745930 | -2.6129280 | 1.5090680  | C  | -3.4730110 | 2.1690760  | 0.1564400  |
| C  | 1.1509370  | -1.8156540 | 2.6230030  | C  | -3.8709840 | 1.0380170  | 0.8745240  |
| H  | 2.1533050  | -1.8446190 | 2.1602580  | C  | -4.6664580 | 0.0452750  | 0.2791070  |
| H  | 0.9137370  | -0.7670400 | 2.8700190  | C  | -5.0600100 | 0.2273420  | -1.0509540 |
| H  | 1.2292800  | -2.3566680 | 3.5784490  | H  | -5.6779900 | -0.5338030 | -1.5320690 |
| C  | -1.7502660 | -2.7557210 | 2.5528800  | C  | -5.0979400 | -1.1610940 | 1.0695160  |
| H  | -2.5384160 | -3.2637660 | 1.9744590  | H  | -5.6015720 | -1.8968810 | 0.4296570  |
| H  | -1.5898270 | -3.3249510 | 3.4816220  | H  | -4.2356330 | -1.6497940 | 1.5448500  |
| H  | -2.1221910 | -1.7549330 | 2.8292270  | H  | -5.7956360 | -0.8708070 | 1.8693660  |
| C  | 0.4454480  | -4.3754980 | 1.1781440  | H  | -3.5677130 | 0.9223640  | 1.9195650  |
| H  | 0.5716860  | -4.9400530 | 2.1152420  | H  | -2.8497460 | 2.9299650  | 0.6333970  |
| H  | -0.2491220 | -4.9406740 | 0.5371170  | H  | -3.5491620 | 3.2068540  | -1.7383660 |
| H  | 1.4210640  | -4.3474340 | 0.6664710  | H  | -4.9822420 | 1.4718670  | -2.8099290 |
| O  | 3.6601980  | -0.9017540 | 0.1613600  | C  | 0.4306650  | 4.3908600  | 1.7996930  |
| C  | 4.7865940  | -0.0294340 | 0.2956580  | H  | 0.3105130  | 4.7334980  | 2.8395270  |
| H  | 4.5288120  | 0.9432720  | -0.1562520 | H  | 1.2971060  | 4.9176480  | 1.3722680  |
| H  | 4.9930980  | 0.1298920  | 1.3632220  | H  | -0.4628480 | 4.7002170  | 1.2337630  |
| C  | 5.9335340  | -0.7170930 | -0.4469810 | C  | 2.3062500  | 2.1294880  | 2.5902500  |
| C  | 5.1882220  | -1.5779030 | -1.4693590 | H  | 3.1380640  | 2.5708260  | 2.0171880  |
| C  | 3.9844800  | -2.0283660 | -0.6541980 | Si | 0.6590070  | 2.5120720  | 1.7213220  |
| H  | 3.1015890  | -2.2866580 | -1.2579280 | C  | -0.7256830 | 1.7789090  | 2.8101580  |
| H  | 4.2324410  | -2.8901240 | -0.0109070 | H  | -1.7000760 | 2.2227690  | 2.5472430  |
| H  | 4.8567810  | -0.9664550 | -2.3223150 | H  | -0.8093370 | 0.6819050  | 2.7136340  |
| H  | 5.7819530  | -2.4173010 | -1.8525110 | H  | -0.5556910 | 1.9937460  | 3.8765660  |
| H  | 6.5055680  | -1.3577520 | 0.2401720  |    |            |            |            |
| H  | 6.6276120  | 0.0009300  | -0.9012860 |    |            |            |            |

**Table S69.** Geometric coordinates and single point energies for NaHMDS disolvated dimer with 2 THF

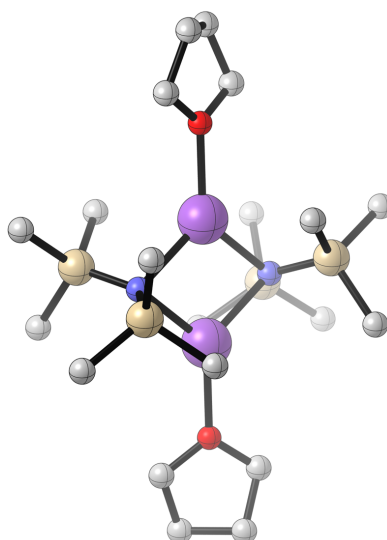

**G** = -2533.768605 Hartrees

**G<sub>SP</sub>** = -2533.120241 Hartrees

| Atom | X          | Y          | Z          | Atom | X          | Y         | Z         |
|------|------------|------------|------------|------|------------|-----------|-----------|
| N    | -0.0000990 | 1.8127690  | 0.0001650  | H    | 6.0456910  | 0.1584590 | 1.5271390 |
| Na   | 1.4548150  | 0.0001210  | 0.0002980  | H    | 6.6856030  | 1.3212710 | 0.3387610 |
| N    | 0.0001880  | -1.8127540 | 0.0002100  | Si   | -0.4395480 | 2.5768140 | 1.4618550 |
| Na   | -1.4548180 | -0.0001050 | 0.0002430  | C    | 1.0530760  | 3.0245010 | 2.5417840 |
| O    | -3.6905860 | -0.0001820 | 0.0000450  | H    | 0.7589210  | 3.4987030 | 3.4910110 |
| C    | -4.4998460 | 1.1243270  | -0.3531840 | H    | 1.6419750  | 2.1239750 | 2.7819770 |
| H    | -4.4520190 | 1.8696970  | 0.4587740  | H    | 1.7118680  | 3.7229560 | 2.0014740 |
| H    | -4.0933470 | 1.5783020  | -1.2678470 | C    | -1.5234920 | 1.3872380 | 2.4899620 |
| C    | -5.9091770 | 0.5656220  | -0.5153740 | H    | -1.7235180 | 1.8022840 | 3.4896650 |
| C    | -5.9095760 | -0.5661810 | 0.5136120  | H    | -2.5043630 | 1.2122210 | 2.0141210 |
| C    | -4.5000320 | -1.1247360 | 0.3527070  | H    | -1.0390020 | 0.4072430 | 2.6412530 |
| H    | -4.0942910 | -1.5785640 | 1.2677790  | C    | -1.4819590 | 4.1488030 | 1.2554450 |
| H    | -4.4514080 | -1.8701910 | -0.4591250 | H    | -0.9345770 | 4.9304920 | 0.7064750 |
| H    | -6.0455740 | -0.1598930 | 1.5270250  | H    | -2.4005360 | 3.9280760 | 0.6883640 |

|    |            |            |            |    |            |            |            |
|----|------------|------------|------------|----|------------|------------|------------|
| H  | -6.6855530 | -1.3216340 | 0.3376340  | H  | -1.7768350 | 4.5685120  | 2.2300820  |
| H  | -6.0442030 | 0.1593260  | -1.5289130 | Si | 0.4391680  | 2.5768530  | -1.4615600 |
| H  | -6.6854000 | 1.3209860  | -0.3400950 | C  | 1.4808790  | 4.1493170  | -1.2552580 |
| Si | 0.4395190  | -2.5768660 | 1.4619030  | H  | 1.7755150  | 4.5691100  | -2.2299320 |
| C  | 1.4814860  | -4.1491520 | 1.2555300  | H  | 0.9331650  | 4.9307840  | -0.7063030 |
| H  | 1.7761390  | -4.5689760 | 2.2301850  | H  | 2.3995860  | 3.9290420  | -0.6882120 |
| H  | 0.9339240  | -4.9306610 | 0.7064830  | C  | -1.0535900 | 3.0238270  | -2.5416090 |
| H  | 2.4001880  | -3.9286820 | 0.6885510  | H  | -1.7126090 | 3.7221710  | -2.0014280 |
| C  | 1.5238260  | -1.3875500 | 2.4899230  | H  | -0.7595880 | 3.4979590  | -3.4909180 |
| H  | 2.5046570  | -1.2127460 | 2.0139260  | H  | -1.6421980 | 2.1230690  | -2.7816460 |
| H  | 1.0395780  | -0.4074490 | 2.6413120  | C  | 1.5236920  | 1.3876400  | -2.4894730 |
| H  | 1.7239020  | -1.8026670 | 3.4895860  | H  | 2.5045360  | 1.2130170  | -2.0134350 |
| C  | -1.0532120 | -3.0241350 | 2.5418630  | H  | 1.0396020  | 0.4074530  | -2.6408020 |
| H  | -1.6419820 | -2.1234840 | 2.7819070  | H  | 1.7237310  | 1.8027200  | -3.4891590 |
| H  | -1.7120930 | -3.7225630 | 2.0016230  | H  | -2.3998940 | -3.9284050 | -0.6881710 |
| H  | -0.7591760 | -3.4982570 | 3.4911660  | O  | 3.6906000  | 0.0001750  | 0.0001370  |
| Si | -0.4391060 | -2.5767750 | -1.4615380 | C  | 4.5000810  | 1.1243870  | 0.3538020  |
| C  | -1.5232020 | -1.3873070 | -2.4896110 | H  | 4.4514100  | 1.8706040  | -0.4573270 |
| H  | -2.5041120 | -1.2124640 | -2.0137870 | H  | 4.0944080  | 1.5773590  | 1.2693270  |
| H  | -1.0388570 | -0.4072290 | -2.6408220 | C  | 5.9096290  | 0.5656670  | 0.5141040  |
| H  | -1.7231340 | -1.8023240 | -3.4893440 | C  | 5.9091530  | -0.5652040 | -0.5159070 |
| C  | 1.0536130  | -3.0241750 | -2.5414600 | C  | 4.4998180  | -1.1240280 | -0.3541520 |
| H  | 1.7125130  | -3.7225380 | -2.0011630 | H  | 4.0932720  | -1.5771570 | -1.2692130 |
| H  | 0.7595510  | -3.4983960 | -3.4907060 | H  | 4.4520100  | -1.8701380 | 0.4571260  |
| H  | 1.6423610  | -2.1235410 | -2.7816210 | H  | 6.0441350  | -0.1579930 | -1.5290850 |
| C  | -1.4812750 | -4.1489420 | -1.2552580 | H  | 6.6853690  | -1.3207420 | -0.3413540 |
| H  | -1.7760720 | -4.5686230 | -2.2299310 | H  | -0.9337780 | -4.9305870 | -0.7063410 |



**Table S70.** Geometric coordinates and single point energies for NaHMDS trisolvated dimer with 3 THF.

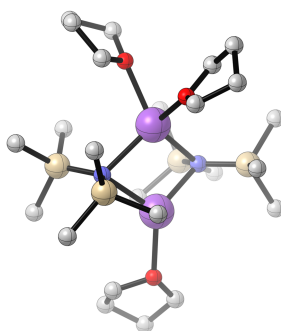

**G** = -2765.831427 Hartrees

**G<sub>SP</sub>** = -2767.813944 Hartrees

| Atom | X          | Y          | Z          | Atom | X          | Y          | Z          |
|------|------------|------------|------------|------|------------|------------|------------|
| Na   | -1.1033070 | 0.2467200  | -0.2782560 | H    | -0.1710980 | 4.8965630  | -1.6442560 |
| Na   | 1.6792540  | 0.1252170  | 0.5484880  | H    | -1.6049050 | 4.1903160  | -0.8847580 |
| N    | 0.1802100  | -1.6814170 | 0.3739910  | O    | 3.8067910  | -0.1602120 | 1.1526610  |
| Si   | -0.0058500 | -2.0307640 | 2.0387620  | C    | 4.9210170  | 0.6747060  | 0.8290410  |
| C    | 0.5102150  | -0.4887080 | 3.0356350  | H    | 4.5892580  | 1.4064570  | 0.0756700  |
| H    | 1.6060430  | -0.3464200 | 3.0262740  | H    | 5.2375240  | 1.2274300  | 1.7260240  |
| H    | 0.0420310  | 0.4305180  | 2.6432970  | C    | 6.0181200  | -0.2618410 | 0.2991040  |
| H    | 0.2186710  | -0.5758740 | 4.0937800  | C    | 5.2482110  | -1.5432260 | -0.0386350 |
| C    | 1.0752480  | -3.4451190 | 2.7021990  | C    | 4.1695280  | -1.5344300 | 1.0333440  |
| H    | 0.9192460  | -3.5851010 | 3.7836890  | H    | 3.2659480  | -2.1043510 | 0.7696660  |
| H    | 0.8444660  | -4.4004830 | 2.2056070  | H    | 4.5548220  | -1.9068020 | 1.9994120  |
| H    | 2.1447300  | -3.2366170 | 2.5419900  | H    | 4.7819340  | -1.4707330 | -1.0328130 |
| C    | -1.7859320 | -2.4552320 | 2.5408020  | H    | 5.8716410  | -2.4458250 | -0.0118420 |
| H    | -2.0917220 | -3.4099230 | 2.0844080  | H    | 6.7604090  | -0.4640860 | 1.0845700  |
| H    | -1.8974230 | -2.5491300 | 3.6327580  | H    | 6.5477590  | 0.1636270  | -0.5625540 |
| H    | -2.4822230 | -1.6809770 | 2.1868640  | O    | -2.7068440 | 0.9684230  | 1.2627700  |
| Si   | 0.2262340  | -2.9269640 | -0.8032470 | C    | -3.0600210 | 0.8819040  | 2.6443660  |
| C    | -0.2869790 | -2.2967540 | -2.5173070 | H    | -3.7320300 | 0.0188110  | 2.7954900  |
| H    | -1.2552280 | -1.7762620 | -2.4516590 | H    | -2.1459590 | 0.7147410  | 3.2318620  |

|    |            |            |            |   |            |            |            |
|----|------------|------------|------------|---|------------|------------|------------|
| H  | -0.4002910 | -3.1384650 | -3.2191800 | C | -3.7742280 | 2.1898170  | 2.9619870  |
| H  | 0.4400080  | -1.5944590 | -2.9510090 | C | -4.4873400 | 2.4690950  | 1.6387960  |
| C  | 1.9448160  | -3.7130450 | -1.0139570 | C | -3.4365290 | 2.0244330  | 0.6262330  |
| H  | 1.9258860  | -4.5149050 | -1.7688440 | H | -3.8544050 | 1.6378830  | -0.3142060 |
| H  | 2.6896300  | -2.9687770 | -1.3397520 | H | -2.7346650 | 2.8427380  | 0.3934660  |
| H  | 2.2925710  | -4.1519490 | -0.0647070 | H | -5.3916590 | 1.8470090  | 1.5544010  |
| C  | -0.9452740 | -4.3892360 | -0.4541600 | H | -4.7782760 | 3.5188180  | 1.5068040  |
| H  | -0.7329780 | -4.8680470 | 0.5146810  | H | -3.0399520 | 2.9809290  | 3.1747310  |
| H  | -2.0016680 | -4.0750770 | -0.4418000 | H | -4.4527670 | 2.1022370  | 3.8200800  |
| H  | -0.8373770 | -5.1589480 | -1.2348480 | O | -3.0222500 | -0.4105930 | -1.3917980 |
| N  | 0.6595530  | 1.8769690  | -0.5421320 | C | -3.5870180 | -0.4928840 | -2.6970240 |
| Si | 1.2434420  | 1.6701230  | -2.1367920 | H | -4.4131790 | 0.2349750  | -2.7915580 |
| C  | 2.2214830  | 3.1118990  | -2.8863330 | H | -2.8089010 | -0.2347620 | -3.4283550 |
| H  | 2.4855710  | 2.8862850  | -3.9316840 | C | -4.0972700 | -1.9232050 | -2.8126150 |
| H  | 1.6480260  | 4.0515480  | -2.8807620 | C | -4.6032370 | -2.1800250 | -1.3920180 |
| H  | 3.1570050  | 3.2858290  | -2.3324250 | C | -3.5990580 | -1.4053780 | -0.5345830 |
| C  | 2.4651640  | 0.2012350  | -2.1904300 | H | -4.0632870 | -0.9063030 | 0.3294290  |
| H  | 3.3904360  | 0.4755040  | -1.6549270 | H | -2.7811890 | -2.0423180 | -0.1597360 |
| H  | 2.0599980  | -0.7165450 | -1.7327970 | H | -5.6146980 | -1.7653460 | -1.2688830 |
| H  | 2.7508440  | -0.0550380 | -3.2227850 | H | -4.6388450 | -3.2448160 | -1.1282120 |
| C  | -0.1737700 | 1.2999070  | -3.3436780 | H | -3.2639830 | -2.5999200 | -3.0534270 |
| H  | -0.7721060 | 0.4429720  | -2.9972280 | H | -4.8725290 | -2.0380940 | -3.5809170 |
| H  | -0.8399290 | 2.1765210  | -3.3998970 | C | -0.1641620 | 3.1708060  | 1.9948450  |
| H  | 0.1783470  | 1.0667460  | -4.3607300 | H | -1.0309230 | 2.4935520  | 1.9988890  |
| Si | 0.5198380  | 3.3932330  | 0.2376660  | H | 0.6039130  | 2.7334120  | 2.6534970  |
| H  | 2.0351330  | 5.2050830  | 1.1001290  | H | -0.4675300 | 4.1346360  | 2.4337820  |
| H  | 2.8965150  | 3.6515260  | 0.9876090  | C | 2.1692080  | 4.3052610  | 0.4785520  |
| C  | -0.6132170 | 4.6200580  | -0.6739750 | H | 2.6093980  | 4.6210600  | -0.4788370 |
| H  | -0.7564980 | 5.5484860  | -0.0986750 |   |            |            |            |

**Table S71.** Geometric coordinates and single point energies for NaHMDS tetrasolvated dimer with 4 THF

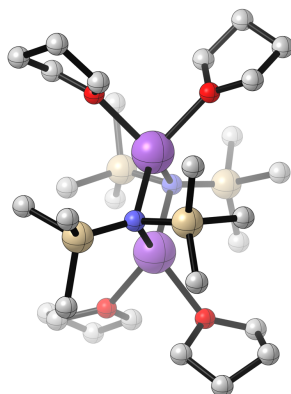

**G** = -2997.89965 Hartrees

**G<sub>SP</sub>** = -2997.013147 Hartrees

| Atom | X          | Y          | Z          | Atom | X          | Y          | Z          |
|------|------------|------------|------------|------|------------|------------|------------|
| Na   | 1.4480640  | 0.0000100  | 0.0000010  | H    | 1.0225970  | -0.4524160 | 2.6765620  |
| N    | 0.0221590  | -1.9137850 | 0.0587160  | H    | -0.7071080 | -0.1135080 | 2.5380700  |
| Na   | -1.3941310 | -0.0000040 | -0.0000070 | H    | -0.1131850 | -1.1323370 | 3.8687650  |
| N    | 0.0221430  | 1.9137880  | -0.0587160 | C    | 1.0619010  | -3.7090250 | 2.3155740  |
| Si   | -0.1787690 | 2.4119440  | -1.6848660 | H    | 0.8939020  | -3.9217890 | 3.3836710  |
| C    | 1.0618600  | 3.7090600  | -2.3155650 | H    | 0.9787170  | -4.6605920 | 1.7683190  |
| H    | 0.8938620  | 3.9218120  | -3.3836650 | H    | 2.0983810  | -3.3540120 | 2.2010980  |
| H    | 0.9786370  | 4.6606280  | -1.7683190 | C    | -1.9123040 | -3.0919560 | 2.0695800  |
| H    | 2.0983520  | 3.3540880  | -2.2010790 | H    | -2.1213780 | -4.0137890 | 1.5060370  |
| C    | 0.0222030  | 0.8953770  | -2.8010240 | H    | -2.0323110 | -3.3130410 | 3.1426130  |
| H    | 1.0226360  | 0.4524560  | -2.6765680 | H    | -2.6760800 | -2.3481150 | 1.7895110  |
| H    | -0.7070620 | 0.1135010  | -2.5380900 | Si   | 0.2361460  | -3.0861750 | -1.1733670 |
| H    | -0.1131570 | 1.1323590  | -3.8687700 | C    | -0.3493850 | -2.5149360 | -2.8860120 |
| C    | -1.9123260 | 3.0919290  | -2.0695980 | H    | -1.3452840 | -2.0486730 | -2.8136010 |
| H    | -2.6760970 | 2.3480780  | -1.7895410 | H    | -0.4215650 | -3.3822560 | -3.5613520 |
| H    | -2.1214220 | 4.0137590  | -1.5060600 | H    | 0.3237220  | -1.7796030 | -3.3493360 |
| H    | -2.0323220 | 3.3130110  | -3.1426330 | C    | 2.0593040  | -3.5899060 | -1.3752060 |

|    |            |            |            |   |            |            |            |
|----|------------|------------|------------|---|------------|------------|------------|
| Si | 0.2360770  | 3.0861790  | 1.1733750  | H | 2.2080210  | -4.2848320 | -2.2168120 |
| C  | -0.3494780 | 2.5149210  | 2.8860050  | H | 2.6886770  | -2.7013990 | -1.5491150 |
| H  | -1.3453600 | 2.0486260  | 2.8135710  | H | 2.4253460  | -4.0827870 | -0.4596370 |
| H  | 0.3236440  | 1.7796080  | 3.3493400  | C | -0.7189360 | -4.7123570 | -0.8941250 |
| H  | -0.4216990 | 3.3822360  | 3.5613470  | H | -0.4731560 | -5.1902270 | 0.0665520  |
| C  | 2.0592230  | 3.5899420  | 1.3752440  | H | -1.8085290 | -4.5455810 | -0.9099490 |
| H  | 2.4252640  | 4.0828300  | 0.4596780  | H | -0.4822670 | -5.4315010 | -1.6943850 |
| H  | 2.2079210  | 4.2848710  | 2.2168520  | O | 3.2021100  | 0.1282720  | -1.4633690 |
| H  | 2.6886100  | 2.7014460  | 1.5491570  | C | 3.5224250  | -0.2619260 | -2.7912740 |
| C  | -0.7190250 | 4.7123480  | 0.8941250  | H | 4.4221020  | -0.9046670 | -2.7903430 |
| H  | -0.4823750 | 5.4314880  | 1.6943940  | H | 2.6802600  | -0.8439130 | -3.1908320 |
| H  | -0.4732340 | 5.1902280  | -0.0665440 | C | 3.7792550  | 1.0516550  | -3.5155670 |
| H  | -1.8086170 | 4.5455630  | 0.9099310  | C | 4.5224440  | 1.8457230  | -2.4374660 |
| O  | -3.0521740 | 0.4364430  | 1.5062010  | C | 3.8750250  | 1.3500030  | -1.1362140 |
| C  | -3.5484920 | 0.1256310  | 2.8057720  | H | 4.6095400  | 1.1589000  | -0.3382390 |
| H  | -4.2880190 | -0.6918500 | 2.7313320  | H | 3.1231920  | 2.0511580  | -0.7408680 |
| H  | -2.7101450 | -0.2217290 | 3.4256890  | H | 5.5932120  | 1.5954860  | -2.4537890 |
| C  | -4.1962590 | 1.4123290  | 3.3031760  | H | 4.4288470  | 2.9326970  | -2.5602730 |
| C  | -4.7589760 | 1.9922700  | 2.0044110  | H | 2.8188010  | 1.5325330  | -3.7572470 |
| C  | -3.6785270 | 1.6181900  | 0.9909400  | H | 4.3539040  | 0.9290880  | -4.4425350 |
| H  | -4.0756360 | 1.3932950  | -0.0105100 | O | 3.2021070  | -0.1282220 | 1.4633910  |
| H  | -2.9080490 | 2.4014110  | 0.8886400  | C | 3.5223910  | 0.2619550  | 2.7913090  |
| H  | -5.7101910 | 1.5005600  | 1.7507750  | H | 4.4220680  | 0.9046960  | 2.7904070  |
| H  | -4.9341770 | 3.0746160  | 2.0466860  | H | 2.6802180  | 0.8439390  | 3.1908550  |
| H  | -3.4326350 | 2.0826020  | 3.7245630  | C | 3.7792080  | -1.0516340 | 3.5155910  |
| H  | -4.9603390 | 1.2320500  | 4.0701620  | C | 4.5224190  | -1.8456870 | 2.4374950  |
| O  | -3.0521540 | -0.4364780 | -1.5062280 | C | 3.8750170  | -1.3499570 | 1.1362390  |
| C  | -3.5484680 | -0.1256790 | -2.8058040 | H | 4.6095410  | -1.1588540 | 0.3382710  |
| H  | -4.2880070 | 0.6917920  | -2.7313730 | H | 3.1231840  | -2.0511050 | 0.7408820  |
| H  | -2.7101210 | 0.2216910  | -3.4257170 |   |            |            |            |
| C  | -4.1962120 | -1.4123880 | -3.3032080 |   |            |            |            |

|    |            |            |            |
|----|------------|------------|------------|
| C  | -4.7589310 | -1.9923290 | -2.0044430 |
| C  | -3.6784910 | -1.6182340 | -0.9909690 |
| H  | -4.0756050 | -1.3933460 | 0.0104800  |
| H  | -2.9080020 | -2.4014440 | -0.8886680 |
| H  | -5.7101520 | -1.5006280 | -1.7508150 |
| H  | -4.9341210 | -3.0746780 | -2.0467150 |
| H  | -3.4325750 | -2.0826520 | -3.7245850 |
| H  | -4.9602880 | -1.2321230 | -4.0702010 |
| Si | -0.1787560 | -2.4119400 | 1.6848660  |
| C  | 0.0221750  | -0.8953630 | 2.8010170  |
| H  | 5.5931850  | -1.5954400 | 2.4538380  |
| H  | 4.4288290  | -2.9326630 | 2.5602890  |
| H  | 2.8187510  | -1.5325180 | 3.7572460  |
| H  | 4.3538390  | -0.9290780 | 4.4425730  |

**Table S72.** Geometric coordinates and single point energies for NaHMDS trisolvated monomer with 3 THF.

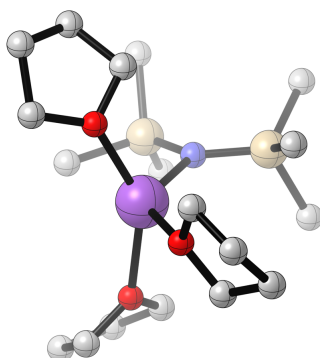

$G = -1731.006704$  Hartrees

$G_{SP} = -1732.396722$  Hartrees

| Atom | X          | Y          | Z          | Atom | X          | Y          | Z          |
|------|------------|------------|------------|------|------------|------------|------------|
| Si   | 2.6181760  | 0.2198260  | -0.0778390 | H    | -3.5535860 | -2.1291220 | -0.2596750 |
| N    | 1.2072890  | 0.0326850  | 0.8292400  | H    | -2.2725350 | -1.9994080 | 0.9781560  |
| Si   | 0.9450640  | -0.2339740 | 2.4778750  | C    | -4.2180570 | -1.1415070 | 1.5773900  |
| C    | 0.9476500  | -2.0787690 | 2.9487980  | C    | -4.8333850 | 0.1196310  | 0.9687970  |
| H    | 0.8029420  | -2.2354240 | 4.0296130  | C    | -3.5989450 | 0.8113210  | 0.4001290  |
| H    | 0.1441020  | -2.6180490 | 2.4200530  | H    | -3.8065580 | 1.4524490  | -0.4674540 |
| H    | 1.9036260  | -2.5464050 | 2.6620720  | H    | -3.0892950 | 1.4161750  | 1.1695190  |
| C    | -0.7829020 | 0.4112840  | 2.9548240  | H    | -5.5309890 | -0.1458330 | 0.1598890  |
| H    | -1.5381780 | -0.0392400 | 2.2889110  | H    | -5.3693130 | 0.7415830  | 1.6969480  |
| H    | -1.0583720 | 0.1723070  | 3.9940650  | H    | -3.7476170 | -0.9038560 | 2.5431930  |
| H    | -0.8382780 | 1.5052070  | 2.8285600  | H    | -4.9389570 | -1.9541090 | 1.7332540  |
| C    | 2.1920930  | 0.6121940  | 3.6327700  | O    | -0.9050840 | 2.2096630  | -1.0871480 |
| H    | 3.2085490  | 0.2240630  | 3.4556870  | C    | -0.2212400 | 3.0480970  | -0.1465210 |
| H    | 2.2156630  | 1.6981500  | 3.4494930  | H    | -0.9630190 | 3.5510360  | 0.4995990  |
| H    | 1.9503210  | 0.4482670  | 4.6948250  | H    | 0.4231590  | 2.4018360  | 0.4696350  |
| Na   | -0.5695990 | 0.0244650  | -0.5599900 | C    | 0.5235380  | 4.0552170  | -1.0096980 |
| O    | -2.7344970 | -0.2461180 | -0.0112950 | C    | -0.4824540 | 4.2837000  | -2.1392880 |
| C    | -3.1491880 | -1.4933770 | 0.5460960  | C    | -1.0667510 | 2.8823130  | -2.3342300 |

|   |            |            |            |   |            |            |            |
|---|------------|------------|------------|---|------------|------------|------------|
| H | -1.6133480 | -3.5328620 | -2.4092490 | H | -2.1328400 | 2.8974330  | -2.6071440 |
| H | -1.4341820 | -1.9495460 | -3.2235340 | H | -0.5188550 | 2.3218740  | -3.1104070 |
| C | 0.3978770  | -3.2096090 | -3.2088340 | H | -1.2653740 | 4.9837760  | -1.8114850 |
| C | 1.2918110  | -3.4414160 | -1.9676670 | H | -0.0328050 | 4.6814290  | -3.0579830 |
| C | 0.4275310  | -2.9506500 | -0.7946880 | H | 1.4488230  | 3.6035090  | -1.3992240 |
| H | -0.0923210 | -3.7946630 | -0.3057780 | H | 0.7888710  | 4.9706070  | -0.4654860 |
| H | 0.9660530  | -2.3652900 | -0.0358310 | O | -0.5442310 | -2.0920150 | -1.3857020 |
| H | 1.5731420  | -4.4948330 | -1.8426960 | C | -0.9168940 | -2.6972090 | -2.6077540 |
| H | 2.2179860  | -2.8560150 | -2.0380590 |   |            |            |            |
| H | 0.8377570  | -2.4476650 | -3.8664280 |   |            |            |            |
| H | 0.2468640  | -4.1186620 | -3.8049840 |   |            |            |            |
| C | 3.8684700  | -1.2056140 | 0.0771410  |   |            |            |            |
| H | 3.3997710  | -2.1818730 | -0.1248030 |   |            |            |            |
| H | 4.7263990  | -1.0889020 | -0.6041310 |   |            |            |            |
| H | 4.2610370  | -1.2421530 | 1.1065950  |   |            |            |            |
| C | 2.1189960  | 0.3340910  | -1.9208540 |   |            |            |            |
| H | 2.9831450  | 0.4383290  | -2.5948380 |   |            |            |            |
| H | 1.5565030  | -0.5634760 | -2.2318360 |   |            |            |            |
| H | 1.4658690  | 1.2105970  | -2.0789060 |   |            |            |            |
| C | 3.6084720  | 1.7988420  | 0.2958920  |   |            |            |            |
| H | 2.9728670  | 2.6952830  | 0.2157890  |   |            |            |            |
| H | 3.9989130  | 1.7670500  | 1.3252850  |   |            |            |            |
| H | 4.4640330  | 1.9231060  | -0.3871570 |   |            |            |            |

**Table S73.** Geometric coordinates and single point energies for NaHMDS tetrasolvated monomer with 4 THF.

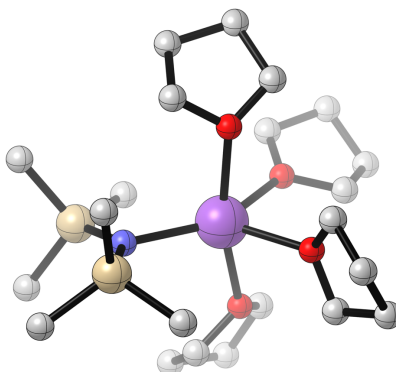

$G = -1963.073823$  Hartrees

$G_{SP} = -1964.727222$  Hartrees

| Atom | X          | Y          | Z          | Atom | X          | Y          | Z         |
|------|------------|------------|------------|------|------------|------------|-----------|
| Na   | 0.2720600  | -0.0111720 | 0.0803480  | H    | -3.7613210 | 2.0696920  | 2.8906150 |
| N    | -2.0170340 | 0.1189060  | -0.0625900 | H    | -2.1536430 | 2.4736830  | 2.2402500 |
| Si   | -2.4618490 | 0.0729410  | -1.6876270 | H    | -3.5970940 | 2.6556960  | 1.2147610 |
| C    | -3.3094710 | 1.6454530  | -2.3463720 | C    | -1.9747930 | -0.6463120 | 2.7777320 |
| H    | -2.6641450 | 2.5306570  | -2.2246320 | H    | -0.9462140 | -0.2511650 | 2.8288730 |
| H    | -3.5689330 | 1.5606150  | -3.4138630 | H    | -2.4490440 | -0.4981190 | 3.7608280 |
| H    | -4.2403770 | 1.8365570  | -1.7879140 | H    | -1.9095340 | -1.7305300 | 2.5887320 |
| C    | -0.8650260 | -0.1098500 | -2.7246020 | C    | -4.6464450 | -0.5151970 | 1.2957540 |
| H    | -1.0566410 | -0.2219500 | -3.8030850 | H    | -5.2697780 | 0.0207480  | 0.5612480 |
| H    | -0.2428030 | 0.7924000  | -2.5899690 | H    | -4.6015880 | -1.5708670 | 0.9838410 |
| H    | -0.2686060 | -0.9761650 | -2.3892710 | H    | -5.1582150 | -0.4661780 | 2.2700320 |
| C    | -3.6265080 | -1.3519880 | -2.1711380 | O    | 1.5023480  | -0.2997290 | 1.9895600 |
| H    | -3.2742380 | -2.3176550 | -1.7759410 | C    | 1.6688760  | 0.7596220  | 2.9301230 |
| H    | -4.6272550 | -1.1749590 | -1.7461590 | H    | 2.6413130  | 1.2527810  | 2.7477890 |
| H    | -3.7368360 | -1.4447170 | -3.2636040 | H    | 0.8715130  | 1.4990420  | 2.7686930 |
| Si   | -2.9042240 | 0.2396680  | 1.3698350  | C    | 1.6351910  | 0.0943620  | 4.3029900 |
| C    | -3.1293510 | 2.0262530  | 1.9891950  | C    | 2.2404100  | -1.2754110 | 3.9934520 |



|   |            |            |            |   |            |            |            |
|---|------------|------------|------------|---|------------|------------|------------|
| C | 1.6338570  | -1.5699760 | 2.6251780  | H | 2.2288740  | 3.8523470  | -1.8526920 |
| H | 2.2533750  | -2.2211640 | 1.9915160  | H | 1.7467050  | 5.0479180  | -0.6424440 |
| H | 0.6362810  | -2.0306740 | 2.7171840  | O | 2.2793230  | 0.0693820  | -1.0340420 |
| H | 3.3365820  | -1.2015010 | 3.9206160  | C | 3.4553060  | -0.3707210 | -0.3654930 |
| H | 1.9952420  | -2.0432310 | 4.7382510  | H | 3.7431340  | 0.3693620  | 0.4033560  |
| H | 0.5943590  | -0.0206710 | 4.6404120  | H | 3.2294720  | -1.3145070 | 0.1483110  |
| H | 2.1874200  | 0.6613030  | 5.0634330  | C | 4.5134160  | -0.4796810 | -1.4564920 |
| O | 0.5775490  | -2.3113920 | -0.2180660 | C | 4.1154500  | 0.6809890  | -2.3700460 |
| C | -0.6500470 | -3.0326200 | -0.0781970 | C | 2.5912190  | 0.6003960  | -2.3183910 |
| H | -0.5807050 | -3.7167340 | 0.7880520  | H | 2.0942180  | 1.5767590  | -2.4300530 |
| H | -1.4484670 | -2.2944690 | 0.0918820  | H | 2.1894660  | -0.0732360 | -3.0944770 |
| C | -0.7823300 | -3.8106820 | -1.3794300 | H | 4.4636560  | 1.6344470  | -1.9424040 |
| C | 0.6725340  | -4.1984990 | -1.6474710 | H | 4.5101760  | 0.5997450  | -3.3906600 |
| C | 1.4344110  | -2.9658430 | -1.1467690 | H | 4.4105630  | -1.4370960 | -1.9908390 |
| H | 2.3820280  | -3.2380940 | -0.6523630 | H | 5.5376900  | -0.4076480 | -1.0690670 |
| H | 1.6648630  | -2.2586630 | -1.9612300 | H | -0.6458180 | 3.8821870  | 0.7096380  |
| H | 0.9429830  | -5.0840690 | -1.0532930 | H | -1.3458030 | 2.5097980  | -0.2207280 |
| H | 0.8822270  | -4.4203140 | -2.7017620 | H | -0.4410450 | 4.7414660  | -1.5914720 |
| H | -1.1601040 | -3.1472810 | -2.1718820 | H | -0.0274020 | 3.1219380  | -2.1969730 |
| H | -1.4589910 | -4.6712230 | -1.2979850 |   |            |            |            |
| O | 0.6108770  | 2.2795930  | 0.3042880  |   |            |            |            |
| C | 1.8142520  | 3.0076400  | 0.1502200  |   |            |            |            |
| H | 2.0573390  | 3.5306640  | 1.0925620  |   |            |            |            |
| H | 2.6151280  | 2.2863340  | -0.0629870 |   |            |            |            |
| C | 1.5668140  | 4.0223770  | -0.9925200 |   |            |            |            |
| C | 0.0822470  | 3.8090200  | -1.3440600 |   |            |            |            |
| C | -0.4548730 | 3.1369880  | -0.0859380 |   |            |            |            |

**Table S74.** Geometric coordinates and single point energies for sodium cation with 5 THF's bound.

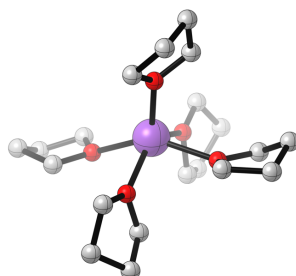

G = -1322.459668 Hartrees

G<sub>SP</sub> = -1323.825501 Hartrees

| Atom | X          | Y          | Z          | Atom | X          | Y          | Z          |
|------|------------|------------|------------|------|------------|------------|------------|
| Na   | -0.1201990 | 0.0299590  | 0.3364380  | H    | 4.3053350  | 0.5856310  | 3.1798120  |
| O    | 1.5192360  | 0.6582040  | -1.1095080 | H    | 4.0258760  | -1.4319580 | 1.7887400  |
| C    | 2.0095210  | 1.9668980  | -1.4066140 | H    | 3.8005550  | -2.0828510 | 3.4292240  |
| H    | 1.6183170  | 2.2925000  | -2.3862330 | O    | -2.3021520 | -0.4851570 | 0.6390730  |
| H    | 1.6383710  | 2.6571770  | -0.6354810 | C    | -2.6990100 | -1.8507960 | 0.8044480  |
| C    | 3.5262880  | 1.8293060  | -1.4510050 | H    | -2.9305030 | -2.2785150 | -0.1859850 |
| C    | 3.6835060  | 0.4190080  | -2.0205210 | H    | -1.8597590 | -2.4158420 | 1.2350310  |
| C    | 2.5293920  | -0.3251590 | -1.3527810 | C    | -3.9301520 | -1.8166920 | 1.7045430  |
| H    | 2.1067500  | -1.1259240 | -1.9770400 | C    | -4.5420080 | -0.4634390 | 1.3434290  |
| H    | 2.8242250  | -0.7665100 | -0.3838480 | C    | -3.2945630 | 0.3939750  | 1.1761370  |
| H    | 3.5464490  | 0.4348490  | -3.1116660 | H    | -3.4276120 | 1.2393030  | 0.4863900  |
| H    | 4.6591320  | -0.0354680 | -1.8083290 | H    | -2.9451910 | 0.7891420  | 2.1454070  |
| H    | 3.9510540  | 1.8870970  | -0.4371740 | H    | -5.0890810 | -0.5309200 | 0.3912670  |
| H    | 4.0042100  | 2.6046120  | -2.0624420 | H    | -5.2267760 | -0.0728140 | 2.1061250  |
| O    | -0.1311340 | -1.8863390 | -0.8924960 | H    | -3.6306300 | -1.8275560 | 2.7629010  |
| C    | -0.6961510 | -1.5318650 | -2.1599090 | H    | -4.6033390 | -2.6652630 | 1.5315150  |
| H    | -1.7750490 | -1.3393550 | -2.0241230 | O    | -0.8983860 | 2.1393920  | 0.0469280  |
| H    | -0.2133460 | -0.6047720 | -2.5060760 | C    | -1.0316120 | 3.3940720  | 0.7191970  |
| C    | -0.4473750 | -2.7317910 | -3.0673730 | H    | -1.7938710 | 3.3019820  | 1.5114110  |
| C    | -0.4959460 | -3.8873780 | -2.0676810 | H    | -0.0707330 | 3.6475980  | 1.1891310  |

|   |            |            |            |   |            |           |            |
|---|------------|------------|------------|---|------------|-----------|------------|
| C | 0.2057430  | -3.2733780 | -0.8620370 | C | -1.4658840 | 4.3814950 | -0.3567890 |
| H | -0.1194550 | -3.6983570 | 0.0987120  | C | -2.3156480 | 3.4890740 | -1.2620610 |
| H | 1.3020460  | -3.3825890 | -0.9385290 | C | -1.5192100 | 2.1885460 | -1.2418520 |
| H | -1.5390610 | -4.1331750 | -1.8177740 | H | -2.1380920 | 1.2857590 | -1.3650980 |
| H | -0.0053050 | -4.8010570 | -2.4248960 | H | -0.7343910 | 2.1829070 | -2.0173070 |
| H | 0.5509960  | -2.6662480 | -3.5261630 | H | -3.3127410 | 3.3384320 | -0.8206240 |
| H | -1.1872710 | -2.8141040 | -3.8728810 | H | -2.4490670 | 3.8873140 | -2.2752590 |
| O | 1.4232490  | -0.3793150 | 1.9111000  | H | -0.5899790 | 4.7584450 | -0.9062010 |
| C | 1.9408120  | -1.6377200 | 2.3524800  | H | -2.0107470 | 5.2417190 | 0.0509540  |
| H | 1.3757260  | -1.9722840 | 3.2378500  |   |            |           |            |
| H | 1.8021690  | -2.3742720 | 1.5475590  |   |            |           |            |
| C | 3.4021180  | -1.3729110 | 2.6941100  |   |            |           |            |
| C | 3.3390920  | 0.0669820  | 3.2044780  |   |            |           |            |
| C | 2.3153050  | 0.6837870  | 2.2575340  |   |            |           |            |
| H | 1.7372900  | 1.5014750  | 2.7111750  |   |            |           |            |
| H | 2.7891790  | 1.0593170  | 1.3336300  |   |            |           |            |
| H | 2.9647050  | 0.0886650  | 4.2383070  |   |            |           |            |

**Table S75.** Geometric coordinates and single point energies for sodium cation with 6 THF's bound.

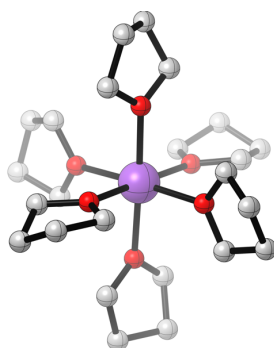

G = -1554.536592 Hartrees

G<sub>SP</sub> = -1556.165596 Hartrees

| Atom | X          | Y         | Z          | Atom | X          | Y          | Z          |
|------|------------|-----------|------------|------|------------|------------|------------|
| Na   | 0.0455590  | 0.0002590 | -0.0013920 | O    | -1.2573120 | -1.7887500 | -0.4826960 |
| O    | 1.3007950  | 1.8457170 | 0.3907730  | C    | -1.1469920 | -3.0451750 | 0.1806870  |
| C    | 2.4165340  | 1.9036730 | 1.2769300  | H    | -0.4161460 | -3.6820520 | -0.3501520 |
| H    | 2.0557450  | 2.0735690 | 2.3071920  | H    | -0.7702600 | -2.8645390 | 1.1978260  |
| H    | 2.9367860  | 0.9342740 | 1.2483220  | C    | -2.5434330 | -3.6479500 | 0.1142730  |
| C    | 3.2564090  | 3.0791540 | 0.7912920  | C    | -3.0029100 | -3.1693820 | -1.2639550 |
| C    | 2.1712960  | 4.0291210 | 0.2834740  | C    | -2.4093870 | -1.7617820 | -1.3229480 |
| C    | 1.1885010  | 3.0554730 | -0.3602640 | H    | -2.1118580 | -1.4608650 | -2.3398390 |
| H    | 0.1428210  | 3.3957990 | -0.3339440 | H    | -3.1129290 | -1.0037590 | -0.9375850 |
| H    | 1.4543510  | 2.8498990 | -1.4115580 | H    | -2.5632450 | -3.8033980 | -2.0481920 |
| H    | 1.6972480  | 4.5493810 | 1.1293290  | H    | -4.0921170 | -3.1756110 | -1.3935450 |
| H    | 2.5406480  | 4.7861930 | -0.4191810 | H    | -3.1811060 | -3.2192940 | 0.9028300  |
| H    | 3.9103750  | 2.7671840 | -0.0375640 | H    | -2.5461500 | -4.7394080 | 0.2241990  |
| H    | 3.8856270  | 3.5090890 | 1.5803200  | O    | 1.3204520  | -1.2412050 | 1.4032670  |
| O    | -1.2787740 | 1.2894300 | -1.3070800 | C    | 1.2028760  | -1.2031150 | 2.8261900  |
| C    | -2.4380770 | 1.9907010 | -0.8618460 | H    | 1.4462780  | -0.1854310 | 3.1770500  |
| H    | -3.1384370 | 1.2685660 | -0.4078960 | H    | 0.1606870  | -1.4189010 | 3.1038560  |
| H    | -2.1491400 | 2.7161430 | -0.0849480 | C    | 2.2050150  | -2.2289970 | 3.3475610  |
| C    | -3.0315500 | 2.6493800 | -2.1071530 | C    | 3.2907190  | -2.1719330 | 2.2725460  |

|   |            |            |            |   |           |            |            |
|---|------------|------------|------------|---|-----------|------------|------------|
| C | -2.5632210 | 1.7058290  | -3.2161540 | C | 2.4494640 | -2.0187370 | 1.0111020  |
| C | -1.1658500 | 1.3519250  | -2.7264780 | H | 2.9616220 | -1.4995760 | 0.1869620  |
| H | -0.7831320 | 0.3849880  | -3.0837660 | H | 2.1062600 | -3.0019360 | 0.6422290  |
| H | -0.4388330 | 2.1358330  | -3.0064140 | H | 3.9278890 | -1.2860890 | 2.4185330  |
| H | -3.1952470 | 0.8048900  | -3.2472680 | H | 3.9367180 | -3.0582120 | 2.2499280  |
| H | -2.5660990 | 2.1634770  | -4.2131120 | H | 1.7499930 | -3.2305450 | 3.3734860  |
| H | -2.5970320 | 3.6491740  | -2.2552610 | H | 2.5683900 | -1.9930920 | 4.3553370  |
| H | -4.1215420 | 2.7583600  | -2.0501000 | O | 1.3294020 | -0.5745660 | -1.7811120 |
| O | -1.2840250 | 0.4661640  | 1.7738190  | C | 1.2287770 | -1.8296860 | -2.4552760 |
| C | -1.1917130 | 1.6667330  | 2.5358470  | H | 1.4777490 | -2.6372590 | -1.7454900 |
| H | -0.4752120 | 1.5252930  | 3.3654470  | H | 0.1897560 | -1.9756980 | -2.7853420 |
| H | -0.8061520 | 2.4606140  | 1.8798630  | C | 2.2353550 | -1.7614220 | -3.6001780 |
| C | -2.5987210 | 1.9034770  | 3.0667710  | C | 3.3085050 | -0.8446590 | -3.0119010 |
| C | -3.0571730 | 0.4681580  | 3.3298850  | C | 2.4526380 | 0.1644220  | -2.2555870 |
| C | -2.4385670 | -0.2819950 | 2.1498830  | H | 2.9554790 | 0.6272520  | -1.3929500 |
| H | -2.1397550 | -1.3118820 | 2.4017580  | H | 2.1034390 | 0.9695940  | -2.9266830 |
| H | -3.1268500 | -0.3299920 | 1.2885690  | H | 3.9492150 | -1.4045350 | -2.3133000 |
| H | -2.6335250 | 0.1058010  | 4.2783110  | H | 3.9524150 | -0.3772340 | -3.7670230 |
| H | -4.1470170 | 0.3541500  | 3.3798100  | H | 1.7789860 | -1.2913550 | -4.4842480 |
| H | -3.2244720 | 2.3720550  | 2.2914480  | H | 2.6108770 | -2.7491720 | -3.8945800 |
| H | -2.6195040 | 2.5418130  | 3.9586520  |   |           |            |            |

**Table S76.** Geometric coordinates and single point energies for NaHMDS disolvated HMPA dimer.

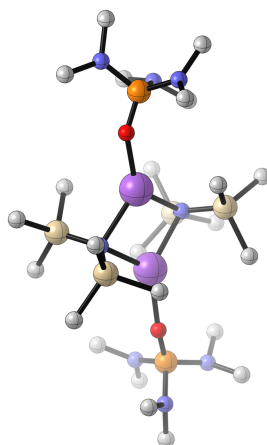

G = -3708.476029 Hartrees

G<sub>SP</sub> = -3711.050065 Hartrees

| Atom | X          | Y          | Z          | Atom | X          | Y         | Z          |
|------|------------|------------|------------|------|------------|-----------|------------|
| Na   | -1.5664420 | 0.4046260  | -0.0754600 | H    | 1.9687200  | 3.7063750 | 2.0476130  |
| N    | 0.0794330  | 2.0635710  | -0.0229720 | H    | 0.9515430  | 3.6187890 | 3.5104620  |
| Na   | 1.3683670  | 0.1372210  | -0.1452490 | H    | 1.6986510  | 2.1427120 | 2.8544820  |
| N    | -0.2803510 | -1.5687600 | 0.0969770  | Si   | 0.5672310  | 2.8924880 | -1.4341090 |
| Si   | -0.5191320 | -2.3430870 | -1.4036640 | C    | 1.2547620  | 1.6462450 | -2.7000100 |
| C    | -1.2035670 | -4.1142020 | -1.3280980 | H    | 2.1850360  | 1.1698690 | -2.3473040 |
| H    | -1.5405440 | -4.4477580 | -2.3225330 | H    | 1.4847900  | 2.1457500 | -3.6541780 |
| H    | -0.4286990 | -4.8171480 | -0.9865660 | H    | 0.5238760  | 0.8499880 | -2.9203460 |
| H    | -2.0548480 | -4.1966660 | -0.6342600 | C    | -0.8448430 | 3.8040360 | -2.3123970 |
| C    | -1.7527430 | -1.3360910 | -2.4498560 | H    | -0.5125170 | 4.2667060 | -3.2551090 |
| H    | -2.7411100 | -1.2780260 | -1.9640080 | H    | -1.6616140 | 3.1008430 | -2.5436370 |
| H    | -1.4076230 | -0.3023120 | -2.6264130 | H    | -1.2609720 | 4.5957980 | -1.6710490 |
| H    | -1.8952450 | -1.7960590 | -3.4403680 | C    | 1.9623950  | 4.1463190 | -1.1326060 |
| C    | 1.0825420  | -2.4662680 | -2.4234490 | H    | 1.6419460  | 4.9452810 | -0.4447870 |
| H    | 1.5477570  | -1.4783930 | -2.5781240 | H    | 2.8222350  | 3.6342660 | -0.6702390 |
| H    | 1.8108680  | -3.0997620 | -1.8900070 | H    | 2.3040570  | 4.6221750 | -2.0655550 |
| H    | 0.9114110  | -2.9139230 | -3.4153540 | O    | -3.7033190 | 0.7862920 | -0.3032940 |

|    |            |            |            |    |            |            |            |
|----|------------|------------|------------|----|------------|------------|------------|
| Si | 0.2491720  | -2.2584220 | 1.5629730  | P  | -4.9565970 | -0.0192950 | -0.1016750 |
| C  | 1.5948160  | -1.1519250 | 2.3483620  | N  | -6.1138480 | 0.9425730  | 0.6197980  |
| H  | 2.5119540  | -1.1025530 | 1.7355090  | C  | -7.4661070 | 0.4631400  | 0.8125190  |
| H  | 1.2267980  | -0.1206210 | 2.4926790  | H  | -7.4818290 | -0.6348190 | 0.8369750  |
| H  | 1.8898490  | -1.5291910 | 3.3402800  | H  | -7.8598460 | 0.8254920  | 1.7763390  |
| C  | -1.0955170 | -2.4230540 | 2.8930450  | H  | -8.1494260 | 0.8093010  | 0.0155170  |
| H  | -1.8942870 | -3.1047950 | 2.5599260  | C  | -5.9328240 | 2.3785240  | 0.7348170  |
| H  | -0.6749190 | -2.8316390 | 3.8257810  | H  | -6.5608680 | 2.9248920  | 0.0091690  |
| H  | -1.5545730 | -1.4508130 | 3.1308610  | H  | -6.2103040 | 2.7132300  | 1.7478080  |
| C  | 0.9989660  | -4.0013130 | 1.4200330  | H  | -4.8824210 | 2.6316810  | 0.5526380  |
| H  | 1.5777180  | -4.2574840 | 2.3220520  | N  | -5.4543000 | -0.6744580 | -1.5573850 |
| H  | 0.2044790  | -4.7557210 | 1.3100760  | C  | -5.1554230 | 0.0367300  | -2.7893700 |
| H  | 1.6645020  | -4.0957770 | 0.5475540  | H  | -6.0402180 | 0.5761860  | -3.1723660 |
| O  | 3.5091180  | 0.2468120  | -0.4827130 | H  | -4.3444200 | 0.7534010  | -2.6147130 |
| P  | 4.8979120  | -0.2094040 | -0.1372430 | H  | -4.8243810 | -0.6777310 | -3.5600330 |
| N  | 5.9981850  | 0.6384310  | -1.0641540 | C  | -6.4884960 | -1.6828210 | -1.6743370 |
| C  | 7.4170730  | 0.5203010  | -0.7980630 | H  | -7.4628950 | -1.2465150 | -1.9603150 |
| H  | 7.6422180  | -0.4608280 | -0.3581940 | H  | -6.2062480 | -2.4137970 | -2.4499820 |
| H  | 7.9825110  | 0.6038530  | -1.7400670 | H  | -6.6067650 | -2.2200850 | -0.7251980 |
| H  | 7.7814390  | 1.3073510  | -0.1122150 | N  | -4.8753710 | -1.3648590 | 0.8909880  |
| C  | 5.5965610  | 1.8330740  | -1.7873100 | C  | -4.0262520 | -2.4662350 | 0.4385610  |
| H  | 5.8816090  | 2.7531320  | -1.2465570 | H  | -4.2867030 | -3.3746570 | 1.0030760  |
| H  | 6.0835950  | 1.8512680  | -2.7754490 | H  | -4.1863240 | -2.6640150 | -0.6288730 |
| H  | 4.5100780  | 1.8334810  | -1.9276320 | H  | -2.9513850 | -2.2545340 | 0.5962330  |
| N  | 5.1618820  | -0.0535930 | 1.5059780  | C  | -4.7865500 | -1.1471480 | 2.3309410  |
| C  | 4.4848890  | 1.0095980  | 2.2318180  | H  | -5.4586130 | -0.3367530 | 2.6358130  |
| H  | 5.1796590  | 1.8291300  | 2.4874090  | H  | -5.0837990 | -2.0694750 | 2.8518250  |
| H  | 3.6661630  | 1.4180920  | 1.6270350  | H  | -3.7595800 | -0.8920100 | 2.6460180  |
| H  | 4.0550410  | 0.6140020  | 3.1665600  | H  | 6.1699810  | -3.1465320 | -1.7724570 |
| C  | 6.2798800  | -0.6480310 | 2.2109490  | H  | 4.5935560  | -2.4959980 | -2.3073020 |
| H  | 7.0728080  | 0.0916690  | 2.4233610  | Si | -0.2925350 | 2.8020930  | 1.4683900  |

|   |           |            |            |   |            |           |           |
|---|-----------|------------|------------|---|------------|-----------|-----------|
| H | 5.9355350 | -1.0578930 | 3.1751730  | C | -1.4649560 | 1.6637600 | 2.4553520 |
| H | 6.7113090 | -1.4679410 | 1.6237380  | H | -2.4557880 | 1.5952580 | 1.9723110 |
| N | 5.2934530 | -1.8122590 | -0.4158770 | H | -1.0479490 | 0.6456930 | 2.5445070 |
| C | 4.5920660 | -2.8186440 | 0.3739370  | H | -1.6259650 | 2.0396180 | 3.4773680 |
| H | 5.1758350 | -3.7514410 | 0.3760470  | C | -1.1915370 | 4.4678580 | 1.3296880 |
| H | 4.4676140 | -2.4822040 | 1.4105430  | H | -1.4395710 | 4.8757630 | 2.3223510 |
| H | 3.5911720 | -3.0346830 | -0.0399990 | H | -0.5764320 | 5.2153610 | 0.8036260 |
| C | 5.5349670 | -2.2478420 | -1.7859220 | H | -2.1284580 | 4.3484510 | 0.7626510 |
| H | 6.0490710 | -1.4607320 | -2.3487870 | C | 1.2206640  | 3.0963600 | 2.5788130 |



**Table S77.** Geometric coordinates and single point energies for NaHMDS disolvated HMPA monomer.

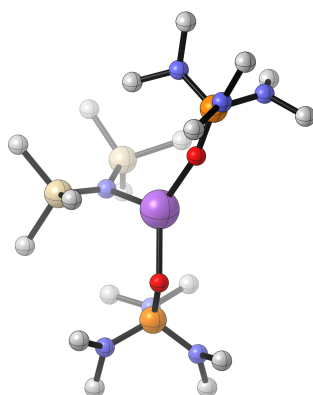

G = -2673.639552 Hartrees

G<sub>SP</sub> = -2675.621637 Hartrees

| Atom | X          | Y          | Z          | Atom | X         | Y          | Z          |
|------|------------|------------|------------|------|-----------|------------|------------|
| Si   | 0.7159340  | 2.3287170  | -1.5443030 | H    | 3.0638500 | -4.6861030 | 0.9571380  |
| N    | 0.4156400  | 1.8645770  | 0.0524560  | H    | 2.4421850 | -3.7983080 | -0.4604650 |
| Si   | -0.1397610 | 2.6338400  | 1.4489300  | N    | 4.3499940 | -0.7552390 | -1.1507200 |
| C    | 1.2195900  | 3.1517460  | 2.6811830  | C    | 3.9930150 | -0.7937390 | -2.5567680 |
| H    | 0.7843960  | 3.6952390  | 3.5354040  | H    | 4.4513060 | -1.6595980 | -3.0684600 |
| H    | 1.7797200  | 2.2929360  | 3.0820450  | H    | 2.9041310 | -0.8576700 | -2.6563740 |
| H    | 1.9451660  | 3.8207000  | 2.1902620  | H    | 4.3371110 | 0.1265250  | -3.0556190 |
| C    | -1.2822800 | 1.4506350  | 2.4187640  | C    | 5.7681470 | -0.6641310 | -0.8747510 |
| H    | -0.7533370 | 0.5197820  | 2.6894530  | H    | 6.3189570 | -1.5540790 | -1.2317930 |
| H    | -1.6588350 | 1.8992930  | 3.3520180  | H    | 6.1918070 | 0.2218740  | -1.3753890 |
| H    | -2.1484710 | 1.1676730  | 1.7982740  | H    | 5.9431880 | -0.5546480 | 0.2041160  |
| C    | -1.1319350 | 4.2358710  | 1.1819920  | N    | 3.4806510 | -0.1964880 | 1.2744010  |
| H    | -0.4715930 | 5.0416000  | 0.8241600  | C    | 3.7171050 | 1.2261020  | 1.0255690  |
| H    | -1.9310240 | 4.1130110  | 0.4358380  | H    | 4.1626160 | 1.6640260  | 1.9324990  |
| H    | -1.5894420 | 4.5749000  | 2.1254540  | H    | 4.4177480 | 1.3587950  | 0.1935430  |
| Na   | 0.0602480  | -0.3747380 | -0.1584380 | H    | 2.7758150 | 1.7506010  | 0.7895470  |
| O    | -1.9885610 | -1.0710050 | -0.2315900 | C    | 2.6797080 | -0.4353170 | 2.4685010  |

|   |            |            |            |   |            |            |            |
|---|------------|------------|------------|---|------------|------------|------------|
| P | -3.4820850 | -1.0394450 | -0.0978040 | H | 2.5094570  | -1.5113270 | 2.6047280  |
| N | -4.0433910 | 0.5320070  | -0.1781630 | H | 3.2088920  | -0.0476850 | 3.3533770  |
| C | -5.4694010 | 0.7884680  | -0.2367360 | H | 1.7045760  | 0.0800380  | 2.4034560  |
| H | -6.0234540 | 0.0097980  | 0.3046850  | C | 2.5507760  | 2.6356090  | -1.9399720 |
| H | -5.6896750 | 1.7557560  | 0.2415520  | H | 3.1334260  | 1.7225230  | -1.7371760 |
| H | -5.8451260 | 0.8307470  | -1.2759160 | H | 2.6987060  | 2.9117310  | -2.9965000 |
| C | -3.2157270 | 1.5809920  | -0.7576690 | H | 2.9635320  | 3.4422080  | -1.3128060 |
| H | -3.3773640 | 1.6827800  | -1.8468080 | C | 0.2050510  | 0.9179640  | -2.7337070 |
| H | -3.4737440 | 2.5394260  | -0.2816120 | H | 0.3850750  | 1.1967470  | -3.7839180 |
| H | -2.1503260 | 1.3916210  | -0.5686230 | H | 0.7802720  | -0.0046710 | -2.5424780 |
| N | -4.1528600 | -2.0446010 | -1.2610200 | H | -0.8675770 | 0.6793050  | -2.6335020 |
| C | -3.4346000 | -2.2804520 | -2.5012430 | C | -0.2272250 | 3.8617780  | -2.1534150 |
| H | -3.8492230 | -1.6847690 | -3.3341930 | H | -1.3149240 | 3.7305460  | -2.0357660 |
| H | -2.3774670 | -2.0235350 | -2.3717780 | H | 0.0597820  | 4.7598100  | -1.5851480 |
| H | -3.5054830 | -3.3453650 | -2.7768580 | H | -0.0211630 | 4.0541980  | -3.2185220 |
| C | -5.5565750 | -2.3995150 | -1.3003300 | H | -3.3805960 | -0.9015810 | 3.1422200  |
| H | -6.1194970 | -1.7959200 | -2.0353480 | O | 1.9203810  | -1.4792180 | -0.5727320 |
| H | -5.6648840 | -3.4597100 | -1.5851340 | P | 3.2875520  | -1.2809060 | 0.0250810  |
| H | -6.0131630 | -2.2648770 | -0.3119520 | N | 3.7745650  | -2.7223940 | 0.7385190  |
| N | -4.1803340 | -1.6212510 | 1.3062310  | C | 4.9201170  | -2.8385590 | 1.6168240  |
| C | -4.0648430 | -3.0417970 | 1.5987050  | H | 5.1478860  | -1.8672810 | 2.0726720  |
| H | -4.9726370 | -3.3916640 | 2.1159470  | H | 4.6971250  | -3.5542470 | 2.4257620  |
| H | -3.9477030 | -3.6128500 | 0.6699550  | H | 5.8195390  | -3.2027790 | 1.0862040  |
| H | -3.1966140 | -3.2500960 | 2.2478270  | C | 3.3296220  | -3.9753050 | 0.1575480  |
| C | -4.2739880 | -0.7971200 | 2.5023770  | H | 4.1153740  | -4.4429300 | -0.4639900 |
| H | -4.3763580 | 0.2597400  | 2.2333440  |   |            |            |            |
| H | -5.1568790 | -1.1045170 | 3.0849670  |   |            |            |            |

**Table S78.** Geometric coordinates and single point energies for NaHMDS trisolvated HMPA monomer.

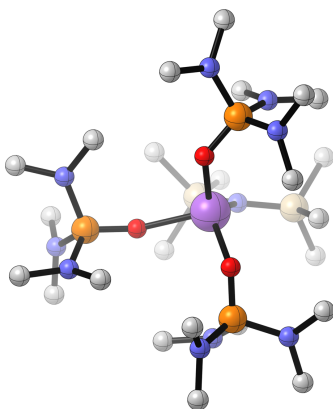

G = -3493.059983 Hartrees

G<sub>SP</sub> = -3495.731653 Hartrees

| Atom | X          | Y          | Z          | Atom | X          | Y          | Z          |
|------|------------|------------|------------|------|------------|------------|------------|
| Si   | -1.7636420 | -1.4221760 | 2.9051490  | H    | 3.2441910  | 2.9330130  | 2.6825800  |
| N    | -0.7323880 | -0.1655500 | 2.4585580  | C    | 4.8411490  | 1.6533750  | 0.9733160  |
| Si   | 0.1309330  | 0.9508520  | 3.3897880  | H    | 5.0230130  | 0.9646790  | 0.1397630  |
| C    | 0.0031520  | 2.7160070  | 2.6848410  | H    | 5.7536290  | 2.2474170  | 1.1463170  |
| H    | 0.6181050  | 3.4323880  | 3.2542840  | H    | 4.6354640  | 1.0639190  | 1.8842220  |
| H    | 0.3373690  | 2.7220260  | 1.6341640  | O    | -1.5779610 | 0.9244320  | -1.3802620 |
| H    | -1.0395120 | 3.0710210  | 2.7156850  | P    | -3.0751780 | 1.0062780  | -1.4254580 |
| C    | 1.9987350  | 0.5661170  | 3.4432930  | N    | -3.5637040 | 2.4678450  | -2.0798080 |
| H    | 2.3973260  | 0.6410610  | 2.4170740  | C    | -4.7766730 | 3.1720070  | -1.7333030 |
| H    | 2.5540380  | 1.2600540  | 4.0963280  | H    | -5.2635670 | 2.6888890  | -0.8768680 |
| H    | 2.1770530  | -0.4575740 | 3.8100540  | H    | -4.5531820 | 4.2172650  | -1.4587840 |
| C    | -0.4368100 | 1.0853560  | 5.2020740  | H    | -5.4922060 | 3.1945370  | -2.5767030 |
| H    | -1.4919370 | 1.3987870  | 5.2527880  | C    | -2.8361600 | 2.9986760  | -3.2144480 |
| H    | -0.3530140 | 0.1156540  | 5.7187880  | H    | -3.4195880 | 2.9181240  | -4.1500420 |
| H    | 0.1620900  | 1.8197040  | 5.7644900  | H    | -2.5992640 | 4.0636340  | -3.0513210 |
| Na   | -0.3315080 | -0.0845210 | 0.1783880  | H    | -1.8918910 | 2.4524100  | -3.3316190 |
| O    | 0.1610190  | -1.8150260 | -1.2164940 | N    | -3.6994570 | -0.2175150 | -2.3727470 |

|   |            |            |            |   |            |            |            |
|---|------------|------------|------------|---|------------|------------|------------|
| P | 1.2081800  | -2.8625940 | -0.9640370 | C | -3.0320270 | -1.5052540 | -2.4451000 |
| N | 0.4697280  | -4.3336590 | -0.6488980 | H | -2.9709100 | -1.8316500 | -3.4971810 |
| C | 1.1892650  | -5.5041080 | -0.1909960 | H | -2.0092400 | -1.4261810 | -2.0491390 |
| H | 2.1578610  | -5.2136870 | 0.2342050  | H | -3.5788970 | -2.2816350 | -1.8774460 |
| H | 0.6097010  | -6.0151740 | 0.5960380  | C | -5.0065630 | -0.1488760 | -2.9837800 |
| H | 1.3622410  | -6.2294120 | -1.0071530 | H | -4.9455310 | -0.4310710 | -4.0484690 |
| C | -0.8597390 | -4.6000650 | -1.1660470 | H | -5.7317020 | -0.8279020 | -2.4979210 |
| H | -0.8278430 | -5.2572570 | -2.0546150 | H | -5.4042980 | 0.8729030  | -2.9276390 |
| H | -1.4705220 | -5.0938030 | -0.3928280 | N | -3.8197010 | 0.9445340  | 0.0563210  |
| H | -1.3461270 | -3.6542370 | -1.4301390 | C | -4.8272540 | -0.0141580 | 0.4595070  |
| N | 2.2399600  | -2.9333190 | -2.2911920 | H | -5.7895180 | 0.4854720  | 0.6761670  |
| C | 1.7338460  | -2.5223870 | -3.5875960 | H | -4.9876190 | -0.7563440 | -0.3322880 |
| H | 1.3241960  | -3.3746910 | -4.1622880 | H | -4.5074320 | -0.5524840 | 1.3647090  |
| H | 0.9438710  | -1.7743740 | -3.4519810 | C | -3.3454300 | 1.8529260  | 1.0953540  |
| H | 2.5490970  | -2.0773720 | -4.1814450 | H | -2.7256240 | 2.6419980  | 0.6451790  |
| C | 3.3025460  | -3.9160920 | -2.3441680 | H | -4.2029450 | 2.3321190  | 1.5981990  |
| H | 2.9766730  | -4.8638970 | -2.8132030 | H | -2.7221320 | 1.3197590  | 1.8335950  |
| H | 4.1456970  | -3.5212930 | -2.9347210 | C | -3.3463780 | -0.8919450 | 3.8353720  |
| H | 3.6694950  | -4.1338460 | -1.3325590 | H | -3.8182830 | 0.0045770  | 3.4060240  |
| N | 2.2557820  | -2.6901540 | 0.3202820  | H | -4.0977800 | -1.6984950 | 3.8645930  |
| C | 3.3463750  | -1.7226680 | 0.2461860  | H | -3.0826740 | -0.6482780 | 4.8772870  |
| H | 4.1508880  | -2.0411420 | 0.9277790  | C | -2.2742900 | -2.3497860 | 1.3173100  |
| H | 3.7456310  | -1.6720740 | -0.7742630 | H | -3.0634550 | -3.1024790 | 1.4764010  |
| H | 3.0059680  | -0.7159070 | 0.5403010  | H | -2.6234040 | -1.6420660 | 0.5447800  |
| C | 1.6872880  | -2.7917970 | 1.6664020  | H | -1.3886350 | -2.8619370 | 0.9050020  |
| H | 0.9190570  | -3.5743290 | 1.6938050  | C | -1.0381100 | -2.7494590 | 4.0677680  |
| H | 2.4875310  | -3.0630500 | 2.3725370  | H | -0.1359300 | -3.2252480 | 3.6554720  |
| H | 1.2246490  | -1.8429580 | 1.9963360  | H | -0.7587650 | -2.2934430 | 5.0311920  |
| O | 1.5176300  | 1.0845420  | -0.0246840 | H | -1.7745130 | -3.5427150 | 4.2772000  |
| P | 2.5508690  | 2.0872220  | -0.4305520 | H | 2.5499720  | 5.0195260  | -2.1613650 |
| N | 3.4621230  | 1.4387740  | -1.6876290 | H | 2.1376640  | 5.6003460  | -0.5263810 |

|   |           |            |            |   |            |           |            |
|---|-----------|------------|------------|---|------------|-----------|------------|
| C | 4.4973310 | 2.2228190  | -2.3284500 | H | 3.6194030  | 4.6463070 | -0.7775830 |
| H | 4.9867790 | 2.8803980  | -1.5976070 | N | 3.7327440  | 2.5418040 | 0.6602270  |
| H | 5.2639230 | 1.5518960  | -2.7485260 | C | 3.4221160  | 3.4714070 | 1.7376930  |
| H | 4.1046260 | 2.8452040  | -3.1550350 | H | 4.2632770  | 4.1699550 | 1.8814170  |
| C | 2.8503250 | 0.4372480  | -2.5443840 | H | 2.5184660  | 4.0452440 | 1.5026670  |
| H | 2.4145430 | 0.8863660  | -3.4569830 | H | -0.0769420 | 2.6471020 | -0.9854370 |
| H | 3.6110540 | -0.2986180 | -2.8564620 | H | -0.0802840 | 4.3681970 | -0.4991150 |
| H | 2.0566480 | -0.0914750 | -2.0008460 | C | 2.5729730  | 4.7559300 | -1.0885990 |
| N | 1.8297090 | 3.5432250  | -0.8212900 |   |            |           |            |
| C | 0.4131890 | 3.6167890  | -1.1395910 |   |            |           |            |
| H | 0.2682100 | 3.9149700  | -2.1933310 |   |            |           |            |

**Table S79.** Geometric coordinates and single point energies for sodium cation solvated by 3 HMPA molecules.

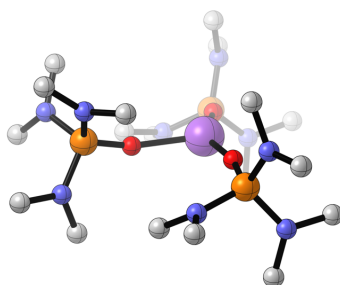

G = -2620.387829 Hartrees

G<sub>SP</sub> = -2622.510303 Hartrees

| Atom | X          | Y          | Z          | Atom | X         | Y          | Z          |
|------|------------|------------|------------|------|-----------|------------|------------|
| Na   | 0.2493170  | -0.7882380 | 0.3399500  | P    | 3.8096600 | -1.1970790 | 0.0843670  |
| O    | -1.7719650 | -1.5157450 | 0.3672720  | N    | 4.1820980 | 0.1139440  | -0.8881150 |
| P    | -3.2147330 | -1.8297560 | 0.0616690  | C    | 5.5074130 | 0.2940910  | -1.4555420 |
| N    | -4.0372710 | -2.2551680 | 1.4407070  | H    | 6.0060820 | -0.6743700 | -1.5852220 |
| C    | -5.2401020 | -3.0673260 | 1.4865400  | H    | 5.4230290 | 0.7685130  | -2.4462470 |
| H    | -5.4610160 | -3.4776550 | 0.4945010  | H    | 6.1455990 | 0.9387340  | -0.8249340 |
| H    | -5.1078130 | -3.9047010 | 2.1913680  | C    | 3.4129760 | 1.3422440  | -0.7809390 |
| H    | -6.1076660 | -2.4756010 | 1.8270530  | H    | 3.9209500 | 2.0825140  | -0.1344390 |
| C    | -3.6888600 | -1.6122190 | 2.6960900  | H    | 3.3032570 | 1.7922860  | -1.7815720 |
| H    | -4.4458860 | -0.8658170 | 2.9942340  | H    | 2.4099230 | 1.1448420  | -0.3817620 |
| H    | -3.6173660 | -2.3662480 | 3.4956000  | N    | 4.7280530 | -1.2942810 | 1.4739450  |
| H    | -2.7141820 | -1.1195180 | 2.6030380  | C    | 4.1719480 | -0.9317350 | 2.7657480  |
| N    | -3.9259610 | -0.4949130 | -0.6447740 | H    | 4.5091180 | 0.0691880  | 3.0883000  |
| C    | -3.1617170 | 0.4334150  | -1.4573500 | H    | 3.0785250 | -0.9393350 | 2.7123590  |
| H    | -3.4461950 | 1.4711560  | -1.2130430 | H    | 4.4935400 | -1.6596730 | 3.5274530  |
| H    | -2.0899570 | 0.3279220  | -1.2452400 | C    | 6.1780640 | -1.3505530 | 1.4304950  |
| H    | -3.3378120 | 0.2773930  | -2.5380600 | H    | 6.6364660 | -0.3615870 | 1.6076230  |
| C    | -5.3665170 | -0.3833670 | -0.7643050 | H    | 6.5475720 | -2.0384490 | 2.2079290  |
| H    | -5.6783730 | 0.6511670  | -0.5499490 | H    | 6.5195740 | -1.7272380 | 0.4579230  |

|   |            |            |            |   |            |            |            |
|---|------------|------------|------------|---|------------|------------|------------|
| H | -5.7258070 | -0.6425640 | -1.7769410 | N | 4.3573370  | -2.4835060 | -0.8223100 |
| H | -5.8660570 | -1.0409330 | -0.0422740 | C | 4.6060920  | -3.7802500 | -0.2087410 |
| N | -3.4932080 | -3.1269410 | -0.9521290 | H | 5.4932490  | -4.2441130 | -0.6674720 |
| C | -3.5810550 | -2.9529480 | -2.3917920 | H | 4.7842040  | -3.6674250 | 0.8662710  |
| H | -4.2174100 | -3.7439480 | -2.8161910 | H | 3.7500500  | -4.4613250 | -0.3520620 |
| H | -4.0356050 | -1.9856270 | -2.6363630 | C | 4.0623510  | -2.5681620 | -2.2451400 |
| H | -2.5923960 | -3.0123790 | -2.8811100 | H | 3.8397190  | -1.5741550 | -2.6491740 |
| C | -2.9984850 | -4.4333320 | -0.5402310 | H | 4.9303540  | -2.9813150 | -2.7826680 |
| H | -2.9296930 | -4.4828340 | 0.5541090  | H | 3.1981100  | -3.2275650 | -2.4354860 |
| H | -3.6889400 | -5.2200660 | -0.8814340 | H | -2.4921710 | 1.6011960  | 2.6698320  |
| H | -1.9992470 | -4.6407700 | -0.9604570 | C | -1.9519500 | 4.1152690  | 1.9326830  |
| O | -0.0348950 | 1.3064850  | -0.1114160 | H | -2.9879140 | 4.4320130  | 1.7204690  |
| P | -0.5209500 | 2.7276060  | 0.0134250  | H | -1.8598860 | 3.9792550  | 3.0231970  |
| N | -1.1799100 | 3.2040850  | -1.4411640 | H | -1.2684930 | 4.9147740  | 1.6237310  |
| C | -1.9932230 | 4.3977170  | -1.5570260 | N | 0.6250150  | 3.8758360  | 0.4125450  |
| H | -2.3360910 | 4.7300110  | -0.5694330 | C | 1.3117830  | 3.7587810  | 1.6900100  |
| H | -1.4448190 | 5.2313780  | -2.0315820 | H | 1.5057150  | 4.7598930  | 2.1058770  |
| H | -2.8844100 | 4.1873230  | -2.1702410 | H | 0.6909270  | 3.2022250  | 2.4038100  |
| C | -0.7755960 | 2.5985550  | -2.6960020 | H | 2.2767640  | 3.2330590  | 1.5852290  |
| H | -1.6645440 | 2.3127930  | -3.2824060 | C | 1.3753440  | 4.5969190  | -0.6006110 |
| H | -0.1754720 | 3.2939720  | -3.3102680 | H | 0.7971480  | 4.6698350  | -1.5292130 |
| H | -0.1826670 | 1.6983350  | -2.4963650 | H | 1.5867770  | 5.6180130  | -0.2475670 |
| N | -1.6302460 | 2.8780360  | 1.2442380  | H | 2.3401220  | 4.1090900  | -0.8257550 |
| C | -2.4941950 | 1.7582080  | 1.5783210  | O | 2.3529010  | -1.1398980 | 0.4619300  |
| H | -3.5376160 | 1.9393310  | 1.2635480  |   |            |            |            |
| H | -2.1387010 | 0.8398360  | 1.0939850  |   |            |            |            |

**Table S80.** Geometric coordinates and single point energies for sodium cation solvated by 4 HMPA molecules.

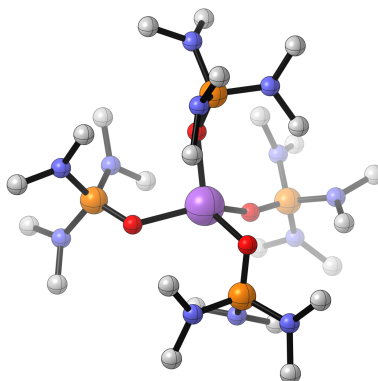

G = -3439.817587 Hartrees

G<sub>SP</sub> = -3442.626722 Hartrees

| Atom | X          | Y          | Z          | Atom | X          | Y          | Z          |
|------|------------|------------|------------|------|------------|------------|------------|
| Na   | -0.0631850 | -0.3487530 | 0.0856390  | H    | 0.5678010  | -3.0268830 | -0.8068320 |
| O    | 1.6354010  | 0.5101470  | -0.9815750 | H    | 1.5855720  | -1.9005610 | -1.7470920 |
| P    | 2.6520390  | 1.5418740  | -1.3833220 | C    | 3.7726720  | -2.0884680 | -0.3148200 |
| N    | 1.9368440  | 2.8222380  | -2.1747480 | H    | 4.3630210  | -1.8960630 | 0.5884790  |
| C    | 2.5819180  | 3.6483320  | -3.1770890 | H    | 4.3067520  | -2.8273520 | -0.9352870 |
| H    | 3.5445770  | 3.2134120  | -3.4710080 | H    | 3.6790860  | -1.1508490 | -0.8899130 |
| H    | 1.9457700  | 3.7270330  | -4.0740110 | O    | -1.5838490 | -1.8951700 | -0.3648600 |
| H    | 2.7591020  | 4.6723820  | -2.8023480 | P    | -2.6795380 | -1.6737300 | -1.3824520 |
| C    | 0.6856380  | 3.3553770  | -1.6620560 | N    | -2.6786030 | -2.9340270 | -2.4690040 |
| H    | 0.8438590  | 4.2997930  | -1.1078350 | C    | -3.3741570 | -2.8636000 | -3.7390420 |
| H    | 0.0001540  | 3.5643790  | -2.4999570 | H    | -3.6419340 | -1.8237280 | -3.9638510 |
| H    | 0.1940960  | 2.6305950  | -0.9987620 | H    | -2.7231650 | -3.2350920 | -4.5466250 |
| N    | 3.4619880  | 2.1026810  | -0.0398780 | H    | -4.2945980 | -3.4748530 | -3.7402140 |
| C    | 3.6523040  | 1.2596280  | 1.1284080  | C    | -2.2069980 | -4.2520660 | -2.0856380 |
| H    | 3.4817800  | 1.8547140  | 2.0407090  | H    | -3.0397740 | -4.9722900 | -1.9959650 |
| H    | 2.9278050  | 0.4331500  | 1.1219750  | H    | -1.5042610 | -4.6384230 | -2.8416790 |
| H    | 4.6783960  | 0.8503030  | 1.1811110  | H    | -1.6859120 | -4.1888130 | -1.1227090 |



|   |            |            |            |   |            |            |            |
|---|------------|------------|------------|---|------------|------------|------------|
| C | 4.2060600  | 3.3456350  | -0.0480250 | N | -4.2188830 | -1.5396100 | -0.7424900 |
| H | 3.9528900  | 3.9445940  | 0.8425500  | C | -4.4084270 | -0.5884750 | 0.3411470  |
| H | 5.2981060  | 3.1785470  | -0.0396330 | H | -4.3535080 | -1.0819640 | 1.3278580  |
| H | 3.9568090  | 3.9390840  | -0.9370480 | H | -3.6303120 | 0.1879150  | 0.3071980  |
| N | 3.7921460  | 0.9916050  | -2.4691210 | H | -5.3942070 | -0.1028610 | 0.2511000  |
| C | 5.1995240  | 0.8059010  | -2.1797920 | C | -5.1315740 | -2.6688650 | -0.7103850 |
| H | 5.8245570  | 1.3271730  | -2.9241940 | H | -5.0097220 | -3.2760150 | 0.2047860  |
| H | 5.4439130  | 1.1992730  | -1.1860620 | H | -6.1687700 | -2.3015460 | -0.7382200 |
| H | 5.4701290  | -0.2641080 | -2.2012500 | H | -4.9788530 | -3.3157340 | -1.5819600 |
| C | 3.3279150  | 0.3835320  | -3.7037660 | N | -2.4879660 | -0.2858950 | -2.2828910 |
| H | 2.2629350  | 0.6049370  | -3.8571190 | C | -3.4113660 | 0.8300400  | -2.3358670 |
| H | 3.8901990  | 0.7784500  | -4.5658240 | H | -3.4103090 | 1.2558460  | -3.3521810 |
| H | 3.4548020  | -0.7132270 | -3.6806080 | H | -4.4294510 | 0.4922710  | -2.1096750 |
| O | 1.0832200  | -1.0695570 | 1.8427660  | H | -3.1153170 | 1.6192440  | -1.6207590 |
| P | 1.7835170  | -2.3728240 | 1.5471160  | C | -1.1496330 | 0.0111720  | -2.7672710 |
| N | 3.0976430  | -2.5254190 | 2.5711750  | H | -0.5171580 | -0.8865810 | -2.7149880 |
| C | 3.8336890  | -3.7758490 | 2.6154080  | H | -1.1934650 | 0.3303200  | -3.8215470 |
| H | 3.8695010  | -4.2348920 | 1.6181050  | H | -0.6698490 | 0.8090680  | -2.1760740 |
| H | 4.8692980  | -3.5836300 | 2.9351560  | O | -1.4185560 | 1.3680220  | 0.2289400  |
| H | 3.3869750  | -4.5001240 | 3.3209250  | P | -1.8698700 | 2.3059740  | 1.3171800  |
| C | 3.1465930  | -1.7490410 | 3.7995120  | N | -2.4687550 | 1.4120610  | 2.6016740  |
| H | 2.7521530  | -2.3158670 | 4.6618770  | C | -2.7500350 | 2.1057240  | 3.8491230  |
| H | 4.1901850  | -1.4757220 | 4.0212450  | H | -3.1383210 | 3.1132790  | 3.6467550  |
| H | 2.5546140  | -0.8352820 | 3.6781050  | H | -3.5164190 | 1.5546600  | 4.4145240  |
| N | 0.6903310  | -3.6278910 | 1.6502910  | H | -1.8528430 | 2.1965390  | 4.4885160  |
| C | -0.5865530 | -3.4539620 | 2.3227750  | C | -1.9932840 | 0.0420430  | 2.7726740  |
| H | -0.6912790 | -4.1753220 | 3.1500670  | H | -0.9744800 | -0.0071840 | 3.1985510  |
| H | -0.6545830 | -2.4368590 | 2.7236050  | H | -2.6813630 | -0.4843160 | 3.4515760  |
| H | -1.4153550 | -3.5921320 | 1.6089890  | H | -1.9925520 | -0.4914100 | 1.8129470  |
| C | 0.9347220  | -4.9662590 | 1.1523310  | N | -0.6089380 | 3.3195260  | 1.7527210  |
| H | 0.9740250  | -5.7009920 | 1.9745290  | C | 0.7383140  | 2.7716050  | 1.7960930  |

|   |            |            |            |   |            |           |           |
|---|------------|------------|------------|---|------------|-----------|-----------|
| H | 0.1258690  | -5.2715050 | 0.4655260  | H | 1.0210790  | 2.4630850 | 2.8190070 |
| H | 1.8811420  | -5.0079310 | 0.5999530  | H | 0.8312560  | 1.9035190 | 1.1310650 |
| N | 2.4586360  | -2.5979620 | 0.0366210  | H | 1.4608320  | 3.5302510 | 1.4515700 |
| C | 1.5982100  | -2.8097740 | -1.1203750 | C | -0.7826050 | 4.5178500 | 2.5561430 |
| H | 1.9723480  | -3.6510610 | -1.7278230 | H | -0.5248460 | 4.3432970 | 3.6155380 |
| C | -2.8381330 | 4.4355830  | -0.0075210 | H | -0.1245900 | 5.3167410 | 2.1768540 |
| H | -3.3736960 | 5.3506580  | 0.2899000  | H | -1.8190480 | 4.8715090 | 2.5025810 |
| H | -1.7649690 | 4.6582800  | -0.0516800 | N | -3.0966750 | 3.3748510 | 0.9573040 |
| H | -3.1791430 | 4.1501410  | -1.0181030 |   |            |           |           |
| C | -4.4979710 | 2.9896230  | 1.0340020  |   |            |           |           |
| H | -4.6353270 | 2.1949810  | 1.7758640  |   |            |           |           |
| H | -5.1012670 | 3.8610070  | 1.3316740  |   |            |           |           |
| H | -4.8729870 | 2.6308580  | 0.0586620  |   |            |           |           |

**Table S81.** Geometric coordinates and single point energies for NaHMDS disolvated DMPU dimer.

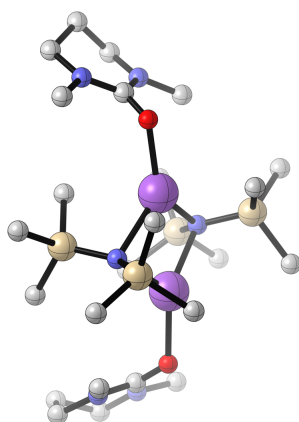

G = -2909.549901 Hartrees

G<sub>SP</sub> = -2911.682836 Hartrees

| Atom | X          | Y          | Z          | Atom | X          | Y          | Z          |
|------|------------|------------|------------|------|------------|------------|------------|
| Na   | -1.4607820 | -0.0881610 | 0.8339100  | C    | 5.2543000  | -1.6807570 | -1.6525160 |
| Na   | 1.4775260  | 0.3319650  | 0.9096860  | N    | 4.5595620  | -1.1951310 | -0.4725040 |
| N    | 0.2763570  | -1.6762770 | 0.7213570  | C    | 4.0515840  | -2.1515030 | 0.4982390  |
| Si   | 0.4383010  | -2.4175920 | 2.2488360  | H    | 4.4675120  | -1.9561400 | 1.4971530  |
| C    | 1.4723710  | -1.2725810 | 3.3671900  | H    | 2.9526050  | -2.1105670 | 0.5629970  |
| H    | 2.4815670  | -1.1032890 | 2.9545890  | H    | 4.3493100  | -3.1578930 | 0.1795710  |
| H    | 0.9903690  | -0.2874910 | 3.4981780  | H    | 6.3048910  | -1.9295280 | -1.4131700 |
| H    | 1.5973320  | -1.6953370 | 4.3757360  | H    | 4.7608400  | -2.6073290 | -1.9805380 |
| C    | 1.2865400  | -4.1151310 | 2.2589290  | H    | 4.1547060  | -0.5468560 | -3.1095660 |
| H    | 1.4960560  | -4.4431390 | 3.2892820  | H    | 5.8149350  | -0.9572700 | -3.6068610 |
| H    | 0.6399590  | -4.8741700 | 1.7925600  | H    | 6.7497410  | 0.6646380  | -1.9967730 |
| H    | 2.2393510  | -4.1018280 | 1.7070590  | H    | 5.5130820  | 1.4846430  | -2.9707560 |
| C    | -1.2300630 | -2.6710250 | 3.1194120  | C    | 4.7858600  | 2.4633640  | -0.7334520 |
| H    | -1.8516630 | -3.3713890 | 2.5381550  | H    | 4.2806940  | 2.5811660  | 0.2299320  |
| H    | -1.1080590 | -3.0892910 | 4.1310060  | H    | 5.7837860  | 2.9266240  | -0.6765850 |
| H    | -1.7986240 | -1.7311460 | 3.2157720  | H    | 4.1999720  | 2.9816130  | -1.5104210 |
| Si   | 0.0332980  | -2.3520220 | -0.8203120 | O    | -3.6408050 | -0.4650310 | 0.7607920  |

|    |            |            |            |   |            |            |            |
|----|------------|------------|------------|---|------------|------------|------------|
| C  | -1.2647020 | -1.3258340 | -1.7803530 | C | -4.3061380 | -0.3992600 | -0.2807040 |
| H  | -2.2669950 | -1.5323030 | -1.3706930 | N | -4.5750290 | 0.8123840  | -0.8461080 |
| H  | -1.2869800 | -1.5936230 | -2.8484630 | C | -5.1731940 | 0.9525500  | -2.1624190 |
| H  | -1.0855310 | -0.2386340 | -1.7178310 | C | -6.1568410 | -0.1776760 | -2.4025820 |
| C  | 1.6138960  | -2.3999370 | -1.8821310 | C | -5.4583560 | -1.5051490 | -2.1788250 |
| H  | 1.3897160  | -2.5722120 | -2.9468740 | N | -4.7918290 | -1.5246080 | -0.8898940 |
| H  | 2.1854630  | -1.4614170 | -1.7945480 | C | -4.4190220 | -2.8297090 | -0.3842010 |
| H  | 2.2620940  | -3.2223660 | -1.5369800 | H | -3.8119910 | -3.3728690 | -1.1281800 |
| C  | -0.6401510 | -4.1277700 | -0.8401550 | H | -3.8346560 | -2.7089340 | 0.5333300  |
| H  | 0.1267910  | -4.8478240 | -0.5160260 | H | -5.3188940 | -3.4253000 | -0.1650710 |
| H  | -1.5012650 | -4.2285610 | -0.1601910 | H | -4.7259770 | -1.6985530 | -2.9859460 |
| H  | -0.9660180 | -4.4198310 | -1.8517180 | H | -6.1852280 | -2.3314490 | -2.1984120 |
| N  | -0.2453440 | 1.9061780  | 0.5554580  | H | -6.9997800 | -0.0817100 | -1.7017120 |
| Si | 0.2434360  | 2.6406250  | -0.9066670 | H | -6.5554430 | -0.1276650 | -3.4247270 |
| C  | 1.2474030  | 4.2393890  | -0.6854260 | H | -4.3957760 | 0.9594150  | -2.9488920 |
| H  | 1.5903560  | 4.6359720  | -1.6547480 | H | -5.6862140 | 1.9234060  | -2.2043350 |
| H  | 0.6598280  | 5.0286600  | -0.1913050 | C | -4.0198810 | 1.9803220  | -0.1803310 |
| H  | 2.1347310  | 4.0497780  | -0.0609510 | H | -2.9171900 | 1.9953530  | -0.2040140 |
| C  | 1.3909610  | 1.4797890  | -1.8917870 | H | -4.3870760 | 2.8788290  | -0.6910960 |
| H  | 2.3416830  | 1.3020860  | -1.3615170 | H | -4.3391060 | 2.0083030  | 0.8706000  |
| H  | 0.9256750  | 0.5024020  | -2.0930450 | C | 0.7793850  | 3.3308480  | 3.0002470  |
| H  | 1.6489960  | 1.9293060  | -2.8644940 | H | 1.3729730  | 4.0669090  | 2.4356880  |
| C  | -1.1899320 | 3.0694220  | -2.0778220 | H | 0.4692030  | 3.7993350  | 3.9474260  |
| H  | -1.7729230 | 2.1708360  | -2.3387840 | H | 1.4457640  | 2.4870680  | 3.2458420  |
| H  | -1.8737100 | 3.7903910  | -1.6017920 | C | -1.7970400 | 4.2781180  | 1.6867370  |
| H  | -0.8211380 | 3.5180030  | -3.0136690 | H | -2.0596970 | 4.7572070  | 2.6430480  |
| Si | -0.7044340 | 2.7505110  | 1.9705710  | H | -1.2826230 | 5.0295460  | 1.0678940  |
| C  | -1.7079070 | 1.5809260  | 3.0919120  | H | -2.7353860 | 4.0131170  | 1.1755130  |
| H  | -2.6459620 | 1.2391170  | 2.6208620  | O | 3.6811550  | 0.4593620  | 0.7836900  |
| H  | -1.1233660 | 0.6887990  | 3.3777410  | C | 4.3563770  | 0.1239970  | -0.1999890 |
| H  | -1.9859550 | 2.0841080  | 4.0305230  | N | 4.9080330  | 1.0531630  | -1.0371360 |

C 5.1937430 -0.6432620 -2.7573810 C 5.6667380 0.6944550 -2.2204940

**Table S82.** Geometric coordinates and single point energies for NaHMDS disolvated DMPU monomer.

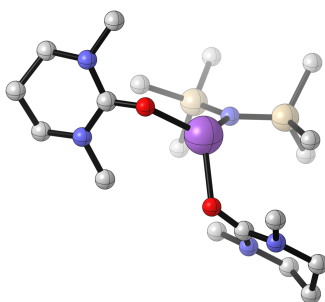

G = -1874.71751 Hartrees

G<sub>SP</sub> = -1876.259356 Hartrees

| Atom | X          | Y          | Z          | Atom | X          | Y          | Z          |
|------|------------|------------|------------|------|------------|------------|------------|
| Si   | -0.8308590 | -2.4437700 | 0.7623100  | C    | -3.1331000 | 1.3572000  | -0.6287390 |
| N    | 0.2943330  | -1.6546310 | -0.2261640 | N    | -4.2957150 | 0.8630110  | -1.1529250 |
| Si   | 1.7345400  | -2.2613640 | -0.8744210 | C    | -5.4661490 | 0.5929240  | -0.3379950 |
| C    | 2.9680500  | -2.8961540 | 0.4313400  | C    | -5.5852530 | 1.6208860  | 0.7696560  |
| H    | 3.9430380  | -3.1682560 | -0.0043250 | C    | -4.2835970 | 1.6631340  | 1.5455470  |
| H    | 3.1368210  | -2.1397600 | 1.2150730  | N    | -3.1636510 | 1.8692900  | 0.6432300  |
| H    | 2.5627910  | -3.7923520 | 0.9292910  | C    | -1.8960810 | 2.2266610  | 1.2506420  |
| C    | 2.6464820  | -0.8768050 | -1.8252990 | H    | -1.2343090 | 2.7023190  | 0.5195160  |
| H    | 2.9507890  | -0.0620640 | -1.1488670 | H    | -2.0847180 | 2.9313030  | 2.0710810  |
| H    | 3.5560220  | -1.2575500 | -2.3166940 | H    | -1.3753830 | 1.3430740  | 1.6676560  |
| H    | 2.0070780  | -0.4454890 | -2.6156020 | H    | -4.1485350 | 0.7252530  | 2.1178760  |
| C    | 1.5314930  | -3.6711690 | -2.1287800 | H    | -4.2925600 | 2.4902290  | 2.2706050  |
| H    | 1.0823070  | -4.5576840 | -1.6555470 | H    | -5.7873830 | 2.6106290  | 0.3332090  |
| H    | 0.8656930  | -3.3611690 | -2.9494840 | H    | -6.4175820 | 1.3658850  | 1.4392100  |
| H    | 2.4979100  | -3.9716290 | -2.5643390 | H    | -6.3495320 | 0.6243200  | -0.9929940 |
| Na   | -0.1377850 | 0.4610770  | -0.8191360 | H    | -5.4050510 | -0.4277630 | 0.0857320  |
| O    | 1.2067470  | 2.0253960  | 0.0157330  | C    | -4.2542360 | 0.2090060  | -2.4441190 |
| C    | 2.4213110  | 1.8993960  | 0.2239320  | H    | -5.1520880 | 0.4779070  | -3.0195550 |
| N    | 2.8752400  | 1.1860640  | 1.2920550  | H    | -3.3632000 | 0.5352350  | -2.9869480 |

|   |            |            |            |   |            |            |            |
|---|------------|------------|------------|---|------------|------------|------------|
| C | 4.2695360  | 0.8024750  | 1.4421720  | H | -4.2235780 | -0.8890080 | -2.3349830 |
| C | 5.1711580  | 1.8897960  | 0.8902070  | C | -0.3973360 | -2.3695770 | 2.6164690  |
| C | 4.7619640  | 2.1932410  | -0.5377760 | H | -0.3966380 | -1.3276580 | 2.9776680  |
| N | 3.3418840  | 2.4867580  | -0.6075050 | H | -1.1127370 | -2.9372680 | 3.2328820  |
| C | 2.8715080  | 3.0674700  | -1.8471820 | H | 0.6084170  | -2.7832200 | 2.7949100  |
| H | 1.8383240  | 3.4040540  | -1.7227860 | C | -2.5362850 | -1.5949360 | 0.6373250  |
| H | 3.5043520  | 3.9276480  | -2.1074720 | H | -3.3038370 | -2.1325740 | 1.2174320  |
| H | 2.9140910  | 2.3368530  | -2.6749370 | H | -2.4734280 | -0.5694360 | 1.0377120  |
| H | 5.0083430  | 1.3393830  | -1.1983800 | H | -2.8686570 | -1.5312890 | -0.4118310 |
| H | 5.3092650  | 3.0679540  | -0.9206160 | C | -1.1098900 | -4.2793320 | 0.3654120  |
| H | 5.0716490  | 2.7979020  | 1.5037880  | H | -1.3934750 | -4.4139080 | -0.6901080 |
| H | 6.2205990  | 1.5677580  | 0.9231210  | H | -0.1875770 | -4.8578570 | 0.5376960  |
| H | 4.4660820  | 0.6439900  | 2.5119650  | H | -1.9009760 | -4.7167270 | 0.9949700  |
| H | 4.4647370  | -0.1572700 | 0.9278050  |   |            |            |            |
| C | 1.8772770  | 0.5008200  | 2.1030020  |   |            |            |            |
| H | 1.1037600  | 1.2128150  | 2.4199480  |   |            |            |            |
| H | 1.3952810  | -0.3229230 | 1.5482060  |   |            |            |            |
| H | 2.3743410  | 0.0983910  | 2.9944480  |   |            |            |            |
| O | -2.0882600 | 1.3691450  | -1.2872360 |   |            |            |            |

**Table S83.** Geometric coordinates and single point energies for NaHMDS trisolvated DMPU monomer.

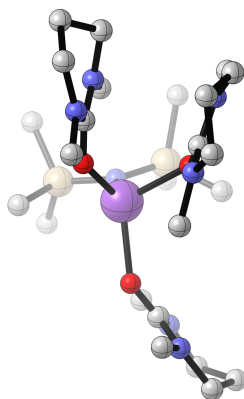

G = -2294.669544 Hartrees

G<sub>SP</sub> = -2296.679577 Hartrees

| Atom | X          | Y          | Z          | Atom | X          | Y          | Z          |
|------|------------|------------|------------|------|------------|------------|------------|
| Si   | 1.9647340  | 2.3106830  | 1.6766360  | H    | 4.3882080  | -4.8297250 | -1.0420620 |
| N    | 1.6055870  | 2.0459240  | 0.0470500  | C    | 1.6706460  | -4.2444360 | -1.4359420 |
| Si   | 1.8984760  | 3.0017990  | -1.3149440 | H    | 1.0842440  | -4.9130230 | -0.7844160 |
| C    | 1.0497630  | 4.7085890  | -1.2960460 | H    | 1.0107590  | -3.4873790 | -1.8688530 |
| H    | 1.2261480  | 5.2678960  | -2.2289740 | H    | 2.1012150  | -4.8530450 | -2.2496450 |
| H    | -0.0386600 | 4.6197320  | -1.1521550 | O    | -1.5542450 | 0.0031750  | -1.5804960 |
| H    | 1.4427260  | 5.3132150  | -0.4621110 | C    | -2.6887880 | 0.3817970  | -1.2900990 |
| C    | 1.2650280  | 2.0818390  | -2.8600100 | N    | -3.8066440 | -0.3050610 | -1.7196720 |
| H    | 0.1877570  | 1.8512580  | -2.8001300 | C    | -5.1598820 | 0.2260040  | -1.7292420 |
| H    | 1.4298380  | 2.6602060  | -3.7826180 | C    | -5.2170110 | 1.6480990  | -1.1958480 |
| H    | 1.8010910  | 1.1230390  | -2.9687850 | C    | -4.2421060 | 1.7723270  | -0.0360440 |
| C    | 3.7313590  | 3.3792380  | -1.6689510 | N    | -2.9095050 | 1.4825160  | -0.5188210 |
| H    | 4.1752320  | 3.9725650  | -0.8546000 | C    | -1.7563620 | 2.2437100  | -0.0636470 |
| H    | 4.3147790  | 2.4492320  | -1.7587770 | H    | -1.0647340 | 2.4244170  | -0.8954440 |
| H    | 3.8516210  | 3.9458990  | -2.6065040 | H    | -2.0987320 | 3.2123470  | 0.3220940  |
| Na   | 0.4973120  | 0.1384630  | -0.5428070 | H    | -1.1908770 | 1.7229260  | 0.7226530  |
| O    | -0.7331630 | -0.6612840 | 1.2017410  | H    | -4.5278870 | 1.0796810  | 0.7812030  |



|   |            |            |            |   |            |            |            |
|---|------------|------------|------------|---|------------|------------|------------|
| C | -1.8493660 | -1.1603340 | 1.3172730  | H | -4.2458510 | 2.7893100  | 0.3766100  |
| N | -2.1756960 | -2.2985800 | 0.6263330  | H | -4.9186910 | 2.3637440  | -1.9757450 |
| C | -3.3825510 | -3.0570880 | 0.8919530  | H | -6.2435550 | 1.8897630  | -0.8883310 |
| C | -4.5125820 | -2.1091450 | 1.2457940  | H | -5.5533470 | 0.1846390  | -2.7595250 |
| C | -4.0857760 | -1.2280940 | 2.4038980  | H | -5.8087420 | -0.4330700 | -1.1215490 |
| N | -2.8091320 | -0.5989630 | 2.1263940  | C | -3.6282000 | -1.5590190 | -2.4122330 |
| C | -2.4479170 | 0.5174750  | 2.9759350  | H | -3.7631980 | -1.4475220 | -3.5018170 |
| H | -1.3893050 | 0.7576500  | 2.8321730  | H | -2.6193420 | -1.9374260 | -2.2213410 |
| H | -3.0535960 | 1.4073050  | 2.7344000  | H | -4.3735610 | -2.2864580 | -2.0479380 |
| H | -2.6161580 | 0.2600350  | 4.0344400  | C | 0.6483420  | 3.3394700  | 2.6016230  |
| H | -4.0292770 | -1.8185280 | 3.3389780  | H | -0.3311460 | 2.8344140  | 2.6030500  |
| H | -4.8293960 | -0.4332860 | 2.5776760  | H | 0.9318480  | 3.5285140  | 3.6497020  |
| H | -4.7277310 | -1.4789360 | 0.3697650  | H | 0.5137490  | 4.3133360  | 2.1032860  |
| H | -5.4203430 | -2.6693640 | 1.5078890  | C | 2.0880560  | 0.6616800  | 2.6180080  |
| H | -3.6340860 | -3.6313900 | -0.0117090 | H | 2.3209780  | 0.8139640  | 3.6841890  |
| H | -3.2254480 | -3.7883150 | 1.7086170  | H | 1.1405120  | 0.1042450  | 2.5441540  |
| C | -1.0962890 | -2.9169700 | -0.1234960 | H | 2.8768710  | 0.0234220  | 2.1856320  |
| H | -1.4806950 | -3.8305830 | -0.5954320 | C | 3.6022390  | 3.2315420  | 1.9936500  |
| H | -0.7296760 | -2.2341750 | -0.9027480 | H | 4.4434650  | 2.7202770  | 1.4984970  |
| H | -0.2419410 | -3.1718670 | 0.5238750  | H | 3.5575070  | 4.2566290  | 1.5904850  |
| O | 1.8711470  | -1.5370750 | -1.1499160 | H | 3.8291280  | 3.3035120  | 3.0695860  |
| C | 2.7971660  | -2.2120250 | -0.6966020 | H | 3.2080960  | 0.3522430  | -0.3624730 |
| N | 2.7209330  | -3.5896180 | -0.6905990 | H | 4.7970500  | 0.1628880  | 0.4029030  |
| C | 3.7702420  | -4.4617170 | -0.1999230 | H | 4.6436090  | -0.0321680 | -1.3682340 |
| C | 4.6360520  | -3.7396590 | 0.8115450  | H | 5.7606440  | -2.5918360 | -0.6407730 |
| C | 5.0809090  | -2.4189420 | 0.2164530  | H | 5.6413590  | -1.8310050 | 0.9571040  |
| N | 3.9269240  | -1.6375280 | -0.1858310 | H | 4.0584190  | -3.5471610 | 1.7281970  |
| C | 4.1480340  | -0.2154710 | -0.3989140 | H | 5.5048130  | -4.3567770 | 1.0773700  |
| H | 3.2957100  | -5.3456750 | 0.2559330  |   |            |            |            |

**Table S84.** Geometric coordinates and single point energies for sodium cation solvated by 3 DMPU molecules.

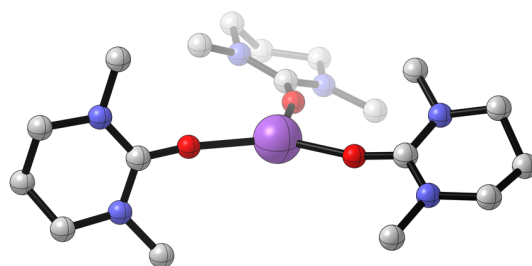

G = -1422.00152 Hartrees

G<sub>SP</sub> = -1423.46305 Hartrees

| Atom | X          | Y          | Z          | Atom | X          | Y          | Z          |
|------|------------|------------|------------|------|------------|------------|------------|
| Na   | 0.1289250  | -0.5187300 | 0.0073490  | N    | 3.9522940  | -2.6301550 | -0.2648860 |
| O    | -1.9203650 | -1.1661830 | 0.1142330  | C    | 3.1887710  | -3.7499780 | -0.7769400 |
| C    | -3.0675050 | -1.6386750 | 0.0416890  | H    | 3.4435940  | -4.6627450 | -0.2163120 |
| N    | -3.4934120 | -2.2379440 | -1.1057780 | H    | 2.1208470  | -3.5474120 | -0.6654980 |
| C    | -4.7618560 | -2.9473900 | -1.1887530 | H    | 3.4165130  | -3.9223460 | -1.8406370 |
| C    | -5.7989290 | -2.2379220 | -0.3399000 | H    | 5.6096500  | -3.4907180 | 0.7039710  |
| C    | -5.2794970 | -2.1142560 | 1.0783300  | H    | 5.7127520  | -3.3920520 | -1.0627090 |
| N    | -3.9318970 | -1.5627270 | 1.0929820  | H    | 6.0860040  | -0.9885810 | -1.0098570 |
| C    | -3.4887340 | -1.0300250 | 2.3647920  | H    | 7.1836670  | -1.7068800 | 0.1900390  |
| H    | -3.6456980 | -1.7751690 | 3.1603580  | H    | 5.6034610  | -1.1503700 | 2.0179110  |
| H    | -2.4248850 | -0.7848750 | 2.3113790  | H    | 5.9345950  | 0.3125320  | 1.0705630  |
| H    | -4.0569170 | -0.1229950 | 2.6261730  | C    | 3.3772530  | 0.6237280  | 1.3141710  |
| H    | -5.2864190 | -3.0976040 | 1.5825290  | H    | 2.4926300  | 0.8954950  | 0.7269480  |
| H    | -5.9249060 | -1.4463830 | 1.6684730  | H    | 3.0621350  | 0.4152610  | 2.3510810  |
| H    | -5.9888900 | -1.2382490 | -0.7583450 | H    | 4.0640350  | 1.4801480  | 1.3284610  |
| H    | -6.7459430 | -2.7929610 | -0.3466870 | O    | 0.2350450  | 1.6262140  | -0.1347430 |
| H    | -4.6473020 | -3.9973200 | -0.8627150 | C    | -0.1033790 | 2.8193940  | -0.1928190 |
| H    | -5.0722680 | -2.9652520 | -2.2421280 | N    | -1.2964600 | 3.2292440  | 0.3282210  |
| C    | -2.5342900 | -2.3946540 | -2.1829550 | C    | -1.6585440 | 4.6340140  | 0.4472870  |

|   |            |            |            |   |            |           |            |
|---|------------|------------|------------|---|------------|-----------|------------|
| H | -1.9909030 | -1.4564780 | -2.3455300 | C | -1.0833770 | 5.4190380 | -0.7148700 |
| H | -1.8026650 | -3.1928290 | -1.9760430 | C | 0.4105110  | 5.1752530 | -0.7877780 |
| H | -3.0780660 | -2.6476000 | -3.1005770 | N | 0.6977780  | 3.7487630 | -0.7886350 |
| O | 2.0801820  | -1.3925510 | 0.0614440  | C | 2.0068790  | 3.3621610 | -1.2741930 |
| C | 3.3115730  | -1.5081720 | 0.1677040  | H | 2.8030540  | 3.7313310 | -0.6060340 |
| N | 4.0612940  | -0.5069180 | 0.7165120  | H | 2.0684070  | 2.2723760 | -1.3364650 |
| C | 5.4721270  | -0.6830060 | 1.0242430  | H | 2.1703430  | 3.7892680 | -2.2742040 |
| C | 6.1280280  | -1.5267410 | -0.0511660 | H | 0.9263590  | 5.6670200 | 0.0573910  |
| C | 5.3887310  | -2.8444460 | -0.1648080 | H | 0.8267040  | 5.6037450 | -1.7111910 |
| H | -1.3023940 | 5.0485820  | 1.4084960  | H | -1.5592950 | 5.0897830 | -1.6505300 |
| H | -2.7553150 | 4.7017710  | 0.4520870  | H | -1.2866520 | 6.4905290 | -0.5899300 |
| C | -2.0939340 | 2.2624860  | 1.0589730  |   |            |           |            |
| H | -2.0679960 | 1.2856210  | 0.5616060  |   |            |           |            |
| H | -1.7430350 | 2.1382400  | 2.0981580  |   |            |           |            |
| H | -3.1324240 | 2.6166120  | 1.0844980  |   |            |           |            |

**Table S85** Geometric coordinates and single point energies for sodium cation solvated by 4 DMPU molecules.

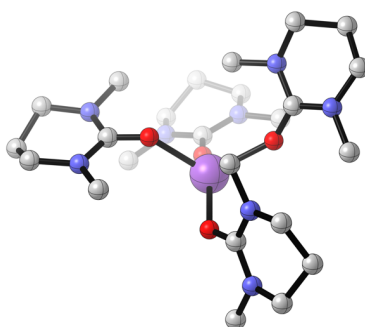

G = -1841.966869 Hartrees

G<sub>SP</sub> = -1843.897348 Hartrees

| Atom | X          | Y          | Z          | Atom | X          | Y          | Z          |
|------|------------|------------|------------|------|------------|------------|------------|
| Na   | -0.1079340 | 0.3340000  | -0.6929780 | H    | -3.8913590 | -3.1838440 | -0.8492170 |
| O    | 1.7815940  | -0.5104380 | -1.3781030 | H    | -3.7000570 | -3.4603100 | 2.6270720  |
| C    | 2.8079200  | -1.1890010 | -1.5028590 | H    | -3.6777280 | -4.6483450 | 1.3116860  |
| N    | 2.7591180  | -2.5551060 | -1.5161610 | H    | -1.3491380 | -5.1930720 | 1.6902030  |
| C    | 3.9221280  | -3.3998860 | -1.7399280 | H    | -2.1159890 | -5.1619530 | 3.2934330  |
| C    | 5.1912860  | -2.7001230 | -1.2971700 | H    | -1.2832600 | -2.8415950 | 3.6616230  |
| C    | 5.2417690  | -1.3218390 | -1.9263440 | H    | 0.0730380  | -3.9042960 | 3.2354370  |
| N    | 4.0325580  | -0.5845390 | -1.5970150 | C    | 0.7080220  | -1.8676440 | 1.7216740  |
| C    | 4.0793850  | 0.8598080  | -1.7218080 | H    | 1.1068320  | -1.7514660 | 0.7057710  |
| H    | 4.0125230  | 1.1842630  | -2.7738970 | H    | 0.5545030  | -0.8576810 | 2.1383590  |
| H    | 3.2526740  | 1.3094910  | -1.1614840 | H    | 1.4472050  | -2.4024070 | 2.3317970  |
| H    | 5.0315950  | 1.2202290  | -1.3074090 | O    | 0.6801500  | 1.4627720  | 1.0319090  |
| H    | 5.3679510  | -1.3997930 | -3.0222640 | C    | 1.4934340  | 2.3724960  | 1.2393060  |
| H    | 6.1002760  | -0.7523100 | -1.5428650 | N    | 1.0959650  | 3.6770610  | 1.2577200  |
| H    | 5.1992320  | -2.6009560 | -0.2010650 | C    | 1.9662190  | 4.7603920  | 1.6871410  |
| H    | 6.0700760  | -3.2891090 | -1.5903810 | C    | 3.4034830  | 4.4575390  | 1.3104180  |
| H    | 3.9860040  | -3.6797910 | -2.8077130 | C    | 3.7869190  | 3.0958740  | 1.8554110  |
| H    | 3.7765870  | -4.3318770 | -1.1734190 | N    | 2.8223840  | 2.0933660  | 1.4332450  |

|   |            |            |            |   |            |            |            |
|---|------------|------------|------------|---|------------|------------|------------|
| C | 1.4778990  | -3.2350020 | -1.5529970 | C | 3.2192990  | 0.7047950  | 1.5547210  |
| H | 0.6632450  | -2.5159170 | -1.4208820 | H | 3.1584850  | 0.3479590  | 2.5978330  |
| H | 1.3489200  | -3.7572320 | -2.5152770 | H | 2.5723940  | 0.0867870  | 0.9227400  |
| H | 1.4248710  | -3.9818490 | -0.7450590 | H | 4.2575460  | 0.5983170  | 1.2099010  |
| O | -1.8039430 | 1.6729870  | -1.1395260 | H | 3.8575450  | 3.1266830  | 2.9588720  |
| C | -3.0348160 | 1.5525780  | -1.0838550 | H | 4.7758350  | 2.7942830  | 1.4790480  |
| N | -3.6537080 | 1.1078050  | 0.0549200  | H | 3.5025000  | 4.4570400  | 0.2143080  |
| C | -5.0951340 | 0.9846650  | 0.1910660  | H | 4.0733190  | 5.2295840  | 1.7111610  |
| C | -5.7436160 | 0.7405780  | -1.1564680 | H | 1.8787320  | 4.9222210  | 2.7775990  |
| C | -5.2733550 | 1.8030100  | -2.1294200 | H | 1.6267990  | 5.6832210  | 1.1961570  |
| N | -3.8216040 | 1.8541960  | -2.1581670 | C | -0.3236140 | 3.9573700  | 1.1300290  |
| C | -3.2242800 | 2.4163570  | -3.3529020 | H | -0.7827030 | 3.2640920  | 0.4150520  |
| H | -3.6338030 | 3.4204540  | -3.5471650 | H | -0.8465940 | 3.8701290  | 2.0976070  |
| H | -2.1428010 | 2.4917650  | -3.2149960 | H | -0.4439790 | 4.9835030  | 0.7597670  |
| H | -3.4378570 | 1.7801050  | -4.2256410 | H | -1.8431170 | 1.1817230  | 1.1210570  |
| H | -5.6897050 | 2.7906140  | -1.8574030 | H | -3.3041730 | 1.5762200  | 2.0686720  |
| H | -5.6227700 | 1.5761420  | -3.1472600 | H | -2.9677760 | -0.1204390 | 1.6194480  |
| H | -5.4566450 | -0.2534310 | -1.5329360 | O | -1.2140240 | -1.4706230 | -0.1152260 |
| H | -6.8372030 | 0.7635510  | -1.0625310 | C | -1.4662240 | -2.2909710 | 0.7750700  |
| H | -5.5147110 | 1.8919620  | 0.6645220  | N | -0.5175090 | -2.6468030 | 1.6934010  |
| H | -5.2974210 | 0.1460370  | 0.8756040  | C | -0.8544250 | -3.4593770 | 2.8497780  |
| C | -2.8964840 | 0.9258570  | 1.2772020  | C | -1.8327630 | -4.5414210 | 2.4332370  |
| C | -3.7459690 | -2.4465810 | -0.0424080 | C | -3.0664730 | -3.8952970 | 1.8330900  |
| H | -4.6939040 | -2.3501190 | 0.5098450  | N | -2.7046250 | -2.8596770 | 0.8759150  |
| H | -3.4806480 | -1.4793600 | -0.4842890 |   |            |            |            |

**Table S86.** Geometric coordinates and single point energies for NaHMDS disolvated DMF dimer.

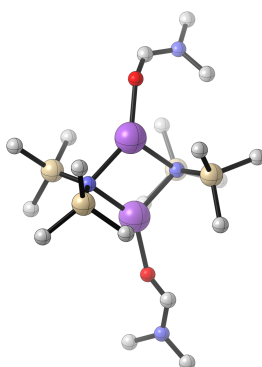

G = -2565.894022 Hartrees

G<sub>SP</sub> = -2567.653526 Hartrees

| Atom | X          | Y          | Z          | Atom | X          | Y          | Z          |
|------|------------|------------|------------|------|------------|------------|------------|
| Na   | -1.4340150 | 0.9481630  | -0.4634510 | H    | 6.6108770  | -0.9107850 | 1.4181050  |
| N    | 0.5709310  | 2.0958760  | -0.1118930 | H    | 4.9145460  | -0.7607910 | 1.9765470  |
| Na   | 1.2573970  | -0.1017850 | 0.2495400  | H    | 5.9111250  | -2.1595570 | 2.4899330  |
| N    | -0.7905500 | -1.2761240 | -0.0759210 | H    | 3.7676780  | -2.5845710 | -0.8951160 |
| Si   | -0.6789340 | -2.0331380 | -1.5948990 | Si   | 0.2089160  | 3.0746550  | 1.2447200  |
| C    | -1.7239120 | -3.5977850 | -1.8565010 | C    | -1.3048120 | 2.3652060  | 2.1563560  |
| H    | -1.6855170 | -3.9079710 | -2.9129270 | H    | -2.2223020 | 2.4259620  | 1.5456210  |
| H    | -1.3397540 | -4.4309390 | -1.2486990 | H    | -1.1528730 | 1.3113660  | 2.4413040  |
| H    | -2.7809660 | -3.4502550 | -1.5875400 | H    | -1.4997100 | 2.9269000  | 3.0831830  |
| C    | -1.2201100 | -0.7937020 | -2.9359230 | C    | -0.2546240 | 4.8657990  | 0.8215500  |
| H    | -2.2784330 | -0.5127280 | -2.8008930 | H    | -0.5063390 | 5.4399360  | 1.7271840  |
| H    | -0.6205770 | 0.1324240  | -2.9077120 | H    | 0.5637540  | 5.3928110  | 0.3070640  |
| H    | -1.1169300 | -1.2080350 | -3.9505240 | H    | -1.1313650 | 4.8816540  | 0.1545520  |
| C    | 1.0972490  | -2.5834580 | -2.0116190 | C    | 1.6169070  | 3.1382310  | 2.5148280  |
| H    | 1.8073230  | -1.7406890 | -1.9933450 | H    | 2.5166650  | 3.5874760  | 2.0664280  |
| H    | 1.4221830  | -3.3213310 | -1.2586090 | H    | 1.3470310  | 3.7291710  | 3.4040980  |
| H    | 1.1624280  | -3.0555790 | -3.0046050 | H    | 1.8842680  | 2.1227520  | 2.8507630  |

|    |            |            |            |    |            |            |            |
|----|------------|------------|------------|----|------------|------------|------------|
| Si | -1.0663490 | -1.9069490 | 1.4818360  | Si | 1.5154520  | 2.6331530  | -1.4329750 |
| C  | 0.3253420  | -1.3562170 | 2.6660350  | C  | 2.3040800  | 1.1393620  | -2.3135060 |
| H  | 1.2978720  | -1.7638430 | 2.3407020  | H  | 3.0059060  | 0.6050540  | -1.6498460 |
| H  | 0.4177860  | -0.2579520 | 2.7313560  | H  | 2.8774300  | 1.4638570  | -3.1958410 |
| H  | 0.1463630  | -1.7173160 | 3.6904830  | H  | 1.5473300  | 0.4196650  | -2.6647530 |
| C  | -2.6958720 | -1.2967640 | 2.2539540  | C  | 0.5014410  | 3.5587300  | -2.7408480 |
| H  | -3.5591560 | -1.8108110 | 1.8017620  | H  | 1.1123530  | 3.8615450  | -3.6056190 |
| H  | -2.7230020 | -1.4947690 | 3.3372150  | H  | -0.3238770 | 2.9298850  | -3.1132490 |
| H  | -2.8328100 | -0.2131310 | 2.1072580  | H  | 0.0546070  | 4.4654970  | -2.3038890 |
| C  | -1.1199810 | -3.7994770 | 1.6008150  | C  | 2.9785300  | 3.7483490  | -0.9609040 |
| H  | -1.2014230 | -4.1253450 | 2.6498740  | H  | 2.6505940  | 4.6641040  | -0.4450920 |
| H  | -1.9841290 | -4.2062180 | 1.0530070  | H  | 3.6630430  | 3.2124230  | -0.2840020 |
| H  | -0.2098180 | -4.2512280 | 1.1743360  | H  | 3.5507620  | 4.0521620  | -1.8516990 |
| O  | 3.2043890  | -1.1474120 | 0.4310480  | O  | -3.6272640 | 1.1874980  | -0.4175490 |
| C  | 4.0036960  | -1.9608490 | -0.0083310 | C  | -4.7058620 | 0.8332130  | 0.0360460  |
| N  | 5.2221560  | -2.1954070 | 0.5051910  | N  | -5.2150050 | -0.4014420 | -0.0690420 |
| C  | 6.1120860  | -3.1766230 | -0.0735960 | C  | -6.5198150 | -0.7344370 | 0.4575260  |
| H  | 7.0483750  | -2.7029740 | -0.4063030 | H  | -7.1863110 | -1.0866770 | -0.3443890 |
| H  | 6.3595420  | -3.9579020 | 0.6613320  | H  | -6.4383640 | -1.5245150 | 1.2193900  |
| H  | 5.6306500  | -3.6485440 | -0.9391590 | H  | -6.9691420 | 0.1532370  | 0.9202910  |
| C  | 5.6926960  | -1.4649490 | 1.6647080  | C  | -4.4609510 | -1.4374890 | -0.7522060 |
| H  | -4.7219720 | -2.4127320 | -0.3191590 | H  | -4.6892140 | -1.4545850 | -1.8304410 |
| H  | -5.3629240 | 1.5384660  | 0.5861040  | H  | -3.3842240 | -1.2667090 | -0.6096570 |

**Table S87.** Geometric coordinates and single point energies for NaHMDS tetrasolvated DMF dimer.

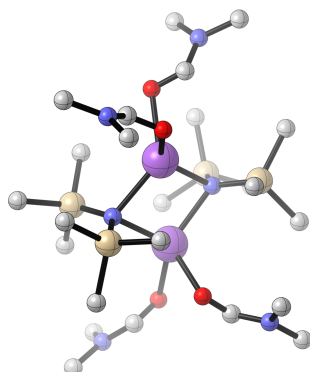

G = -3062.152163 Hartrees

G<sub>SP</sub> = -3064.478895 Hartrees

| Atom | X          | Y          | Z         | Atom | X          | Y          | Z          |
|------|------------|------------|-----------|------|------------|------------|------------|
| Na   | -1.3746360 | 0.3435970  | 0.0620200 | H    | 4.2236260  | 0.5481030  | -0.1043360 |
| N    | -0.4873010 | -1.8623790 | 0.2998600 | Si   | -0.9685370 | -2.7380420 | -1.0838020 |
| Na   | 1.4204690  | -0.4857560 | 0.2253580 | C    | -1.1277210 | -1.5858370 | -2.5782120 |
| N    | 0.5256380  | 1.7428580  | 0.2361890 | H    | -1.8897920 | -0.8011410 | -2.4391030 |
| Si   | 0.5176280  | 2.3491780  | 1.8327450 | H    | -0.1689780 | -1.0743660 | -2.7597400 |
| C    | 0.4180900  | 4.2383940  | 2.0232550 | H    | -1.3911230 | -2.1478400 | -3.4889610 |
| H    | 0.3456860  | 4.5019920  | 3.0907650 | C    | -2.6487190 | -3.6187680 | -0.8856180 |
| H    | 1.3119950  | 4.7362070  | 1.6150420 | H    | -2.9846580 | -4.0850540 | -1.8255420 |
| H    | -0.4626020 | 4.6541950  | 1.5092990 | H    | -2.5963490 | -4.4057180 | -0.1161250 |
| C    | -0.9895360 | 1.6927880  | 2.7863950 | H    | -3.4182420 | -2.9001360 | -0.5634930 |
| H    | -1.9129830 | 2.1590080  | 2.4058120 | C    | 0.2450200  | -4.1048420 | -1.6213900 |
| H    | -1.1260240 | 0.6029790  | 2.6994720 | H    | 0.2989530  | -4.9088350 | -0.8723910 |
| H    | -0.9157650 | 1.9272320  | 3.8601820 | H    | -0.0548380 | -4.5533210 | -2.5832660 |
| C    | 2.0824540  | 1.8751390  | 2.8129420 | H    | 1.2574400  | -3.6864410 | -1.7328720 |
| H    | 2.2628250  | 0.7883270  | 2.8191630 | Si   | -0.5350240 | -2.5615990 | 1.8634130  |
| H    | 2.9572860  | 2.3592280  | 2.3452860 | C    | 0.7229920  | -1.7361420 | 3.0197060  |
| H    | 2.0241540  | 2.2157010  | 3.8594660 | H    | 1.7525870  | -1.8694790 | 2.6481440  |



|    |            |            |            |   |            |            |            |
|----|------------|------------|------------|---|------------|------------|------------|
| Si | 1.0334820  | 2.6023940  | -1.1506980 | H | 0.6710760  | -2.1815690 | 4.0258950  |
| C  | 0.5699830  | 1.6928910  | -2.7437080 | H | 0.5411380  | -0.6565960 | 3.1326400  |
| H  | 1.1390170  | 0.7525820  | -2.8031620 | C | -2.2443410 | -2.3956610 | 2.6788840  |
| H  | -0.5039080 | 1.4514000  | -2.7742540 | H | -2.2804200 | -2.8617420 | 3.6765130  |
| H  | 0.8190350  | 2.3008090  | -3.6288500 | H | -2.5208980 | -1.3339710 | 2.7779540  |
| C  | 0.2973760  | 4.3539310  | -1.3276580 | H | -3.0038980 | -2.8801650 | 2.0414860  |
| H  | 0.7309510  | 5.0671700  | -0.6121220 | C | -0.1046580 | -4.4140450 | 1.9249740  |
| H  | 0.4817200  | 4.7411520  | -2.3434780 | H | -0.8073010 | -5.0263290 | 1.3379660  |
| H  | -0.7900750 | 4.3279580  | -1.1561700 | H | 0.9077600  | -4.5900850 | 1.5278630  |
| C  | 2.9237920  | 2.8463850  | -1.2488380 | H | -0.1291120 | -4.7807560 | 2.9635450  |
| H  | 3.2038930  | 3.5831860  | -2.0185280 | O | -2.6816940 | 1.3710420  | -1.5643380 |
| H  | 3.3295230  | 3.1905500  | -0.2824320 | C | -3.0199150 | 2.4630170  | -1.1296700 |
| H  | 3.3966220  | 1.8870420  | -1.5155180 | N | -3.1329100 | 3.5837150  | -1.8646600 |
| O  | 2.6524120  | -0.7554870 | -1.6916780 | C | -3.4958710 | 4.8484370  | -1.2674560 |
| C  | 3.2142750  | -1.8341510 | -1.8202720 | H | -3.6839150 | 4.7099890  | -0.1950220 |
| N  | 3.1931170  | -2.5831260 | -2.9361280 | H | -2.6800060 | 5.5788320  | -1.3870270 |
| C  | 3.7922490  | -3.8978930 | -2.9758240 | H | -4.4044620 | 5.2550180  | -1.7381630 |
| H  | 4.3347730  | -4.0848970 | -2.0404020 | C | -2.7718520 | 3.5848270  | -3.2671840 |
| H  | 3.0155570  | -4.6711090 | -3.0897880 | H | -1.8369680 | 4.1482360  | -3.4180450 |
| H  | 4.4974690  | -3.9765620 | -3.8169980 | H | -2.6230170 | 2.5498710  | -3.5928510 |
| C  | 2.3876080  | -2.1822230 | -4.0720580 | H | -3.5724520 | 4.0505160  | -3.8610320 |
| H  | 1.4701420  | -2.7914750 | -4.1231610 | H | -3.2755210 | 2.6010010  | -0.0573690 |
| H  | 2.1086640  | -1.1289730 | -3.9581340 | O | -3.4595340 | 0.3648480  | 1.0798170  |
| H  | 2.9610440  | -2.3153800 | -5.0007240 | C | -4.1790810 | -0.4314900 | 0.4941840  |
| H  | 3.7995170  | -2.2794760 | -0.9877620 | N | -5.1562710 | -1.1557820 | 1.0689200  |
| O  | 3.5114510  | -0.8872770 | 1.1483650  | C | -5.9362990 | -2.1120760 | 0.3176150  |
| C  | 4.2262990  | 0.0755360  | 0.8993050  | H | -5.6609540 | -2.0631780 | -0.7435090 |
| N  | 5.0655470  | 0.6607640  | 1.7695310  | H | -5.7490400 | -3.1362760 | 0.6773090  |
| C  | 5.8052780  | 1.8494360  | 1.4118390  | H | -7.0111490 | -1.8943830 | 0.4161840  |
| H  | 5.4804780  | 2.7042320  | 2.0269310  | C | -5.4197110 | -1.0473340 | 2.4887870  |
| H  | 6.8847090  | 1.6978730  | 1.5662860  | H | -5.1917020 | -1.9973970 | 2.9956210  |

|   |           |            |           |   |            |            |            |
|---|-----------|------------|-----------|---|------------|------------|------------|
| H | 5.6245910 | 2.0933520  | 0.3570270 | H | -4.7809590 | -0.2599540 | 2.9026480  |
| C | 5.1353130 | 0.2147860  | 3.1448420 | H | -6.4781880 | -0.7946000 | 2.6563320  |
| H | 4.7538860 | 1.0001170  | 3.8161810 | H | -4.0756550 | -0.6087980 | -0.5982780 |
| H | 4.5148680 | -0.6813500 | 3.2538840 |   |            |            |            |
| H | 6.1761690 | -0.0177660 | 3.4169690 |   |            |            |            |

**Table S88** Geometric coordinates and single point energies for NaHMDS disolvated DMF monomer.

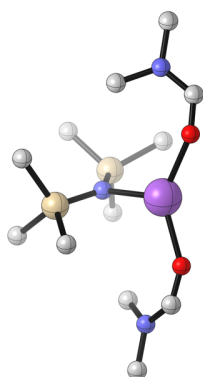

G = -1531.066646 Hartrees

G<sub>SP</sub> = -1532.233946 Hartrees

| Atom | X          | Y          | Z          | Atom | X          | Y          | Z          |
|------|------------|------------|------------|------|------------|------------|------------|
| Si   | 0.6165410  | 1.3591270  | -1.3945640 | H    | 5.8906690  | -1.1318130 | 1.1427690  |
| N    | 0.0000090  | 0.6185400  | -0.0000960 | C    | 3.3344990  | -0.1130730 | 0.9675190  |
| Si   | -0.6164400 | 1.3585300  | 1.3947150  | H    | 2.2566820  | -0.0776580 | 0.7485580  |
| C    | 0.7298200  | 1.9123160  | 2.6189430  | H    | 3.4900160  | -0.1290770 | 2.0581780  |
| H    | 0.3084160  | 2.4303960  | 3.4950400  | H    | 3.7976130  | 0.7971470  | 0.5611230  |
| H    | 1.3005280  | 1.0433980  | 2.9845390  | H    | 3.8309540  | -3.1470800 | -0.4738830 |
| H    | 1.4388670  | 2.5976850  | 2.1270040  | O    | -2.0171180 | -2.4678650 | -0.1417610 |
| C    | -1.7076530 | 0.1265830  | 2.3563820  | C    | -3.2233180 | -2.3416290 | 0.0095470  |
| H    | -1.1521410 | -0.7961220 | 2.5984240  | N    | -3.9502460 | -1.2726300 | -0.3437160 |
| H    | -2.0568750 | 0.5543360  | 3.3093480  | C    | -5.3861090 | -1.2504620 | -0.1718400 |
| H    | -2.5974530 | -0.1609640 | 1.7723000  | H    | -5.7227610 | -2.1897120 | 0.2848800  |
| C    | -1.6979200 | 2.8918450  | 1.0800740  | H    | -5.6831710 | -0.4146640 | 0.4792420  |
| H    | -1.1167090 | 3.6830540  | 0.5798310  | H    | -5.8906780 | -1.1310010 | -1.1429550 |
| H    | -2.5509310 | 2.6506010  | 0.4264350  | C    | -3.3345690 | -0.1125430 | -0.9671100 |
| H    | -2.0953910 | 3.3108140  | 2.0181490  | H    | -2.2566880 | -0.0774170 | -0.7484280 |
| Na   | -0.0000510 | -1.6223650 | -0.0004390 | H    | -3.4903880 | -0.1278470 | -2.0577370 |
| O    | 2.0169940  | -2.4679370 | 0.1412980  | H    | -3.7974120 | 0.7975060  | -0.5600160 |

|   |            |            |            |   |            |            |            |
|---|------------|------------|------------|---|------------|------------|------------|
| C | 3.2231850  | -2.3417030 | -0.0100890 | H | -3.8311610 | -3.1471840 | 0.4729330  |
| N | 3.9501620  | -1.2728730 | 0.3435670  | C | 1.6976100  | 2.8925640  | -1.0791470 |
| C | 5.3860180  | -1.2506480 | 0.1716200  | H | 2.5506370  | 2.6510930  | -0.4256070 |
| H | 5.7226000  | -2.1896200 | -0.2857240 | H | 2.0950530  | 3.3121450  | -2.0169570 |
| H | 5.6830540  | -0.4144570 | -0.4789660 | H | 1.1162340  | 3.6833720  | -0.5784640 |
| H | 2.5976510  | -0.1601870 | -1.7719180 | C | 1.7082580  | 0.1277810  | -2.3564160 |
| H | 1.1528240  | -0.7947360 | -2.5993580 | H | 2.0581270  | 0.5560830  | -3.3088950 |
| C | -0.7297760 | 1.9128120  | -2.6187670 |   |            |            |            |
| H | -1.2999370 | 1.0437320  | -2.9848390 |   |            |            |            |
| H | -1.4392850 | 2.5975480  | -2.1266110 |   |            |            |            |
| H | -0.3085390 | 2.4315340  | -3.4945650 |   |            |            |            |

**Table S89.** Geometric coordinates and single point energies for NaHMDS trisolvated DMF monomer.

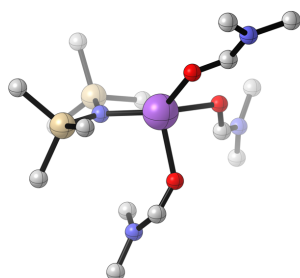

G = -1779.193206 Hartrees

G<sub>SP</sub> = -1780.64386 Hartrees

| Atom | X          | Y          | Z          | Atom | X          | Y          | Z          |
|------|------------|------------|------------|------|------------|------------|------------|
| Si   | 1.8156620  | 0.4025630  | -2.0770990 | N    | 2.0883570  | 0.3967620  | 2.9645700  |
| N    | 1.2876580  | -0.6262580 | -0.8411840 | C    | 3.0875970  | 0.1656200  | 3.9839710  |
| Si   | 1.9684150  | -2.1152960 | -0.4062160 | H    | 2.6631510  | -0.4516440 | 4.7862190  |
| C    | 2.4846680  | -3.2272370 | -1.8580640 | H    | 3.9560980  | -0.3595120 | 3.5578880  |
| H    | 2.8600490  | -4.2042460 | -1.5142200 | H    | 3.4299060  | 1.1176350  | 4.4183840  |
| H    | 1.6313580  | -3.4027390 | -2.5318090 | C    | 2.4536970  | 1.1896660  | 1.8009910  |
| H    | 3.2826170  | -2.7506110 | -2.4505670 | H    | 1.9376840  | 0.7912370  | 0.9103400  |
| C    | 0.7166060  | -3.1237860 | 0.6201960  | H    | 2.2095710  | 2.2548510  | 1.9542120  |
| H    | -0.1953240 | -3.3387900 | 0.0389330  | H    | 3.5358780  | 1.0961710  | 1.6403970  |
| H    | 1.1415960  | -4.0892120 | 0.9366260  | H    | 0.6985910  | -0.7237750 | 3.9757040  |
| H    | 0.4136730  | -2.5875540 | 1.5363270  | C    | 1.3938980  | -0.1827290 | -3.8342570 |
| C    | 3.5123220  | -1.9727970 | 0.7070980  | H    | 0.3073380  | -0.3323890 | -3.9355210 |
| H    | 4.2749670  | -1.3303020 | 0.2383480  | H    | 1.7154320  | 0.5407670  | -4.6006520 |
| H    | 3.2384500  | -1.5262180 | 1.6765370  | H    | 1.8813210  | -1.1464790 | -4.0487980 |
| H    | 3.9672170  | -2.9565940 | 0.9050500  | C    | 0.9988810  | 2.1179470  | -1.9064500 |
| Na   | -0.7333650 | -0.5235900 | 0.2000190  | H    | 1.3526840  | 2.8185860  | -2.6797370 |
| O    | -2.7436140 | -1.5440780 | 0.1302730  | H    | -0.0951140 | 2.0211040  | -2.0007900 |
| C    | -3.8037630 | -0.9422020 | 0.0860170  | H    | 1.2231600  | 2.5549760  | -0.9181490 |
| N    | -5.0163390 | -1.5312190 | 0.0408930  | C    | 3.6943740  | 0.7240720  | -2.0702020 |

|   |            |            |            |   |            |            |            |
|---|------------|------------|------------|---|------------|------------|------------|
| C | -6.2319680 | -0.7555580 | -0.0176840 | H | 4.0186890  | 1.1422700  | -1.1032950 |
| H | -5.9871050 | 0.3140970  | -0.0102950 | H | 4.2487590  | -0.2162580 | -2.2240090 |
| H | -6.7968830 | -0.9799010 | -0.9362840 | H | 3.9982710  | 1.4254220  | -2.8637090 |
| H | -6.8786710 | -0.9735000 | 0.8469070  | H | -0.8941350 | 5.5746890  | 0.8114610  |
| C | -5.1368040 | -2.9733840 | 0.0388940  | C | -2.0926950 | 3.9986710  | -1.1220080 |
| H | -4.1317280 | -3.4052350 | 0.0882370  | H | -1.4516160 | 4.2389400  | -1.9855480 |
| H | -5.7248600 | -3.3111230 | 0.9063060  | H | -2.7169240 | 3.1340580  | -1.3701190 |
| H | -5.6382480 | -3.3162900 | -0.8794330 | H | -2.7306860 | 4.8667550  | -0.8976150 |
| H | -3.8386450 | 0.1663420  | 0.0779300  | H | -0.4905500 | 2.2451320  | 1.3000030  |
| O | -1.8853690 | 1.4677780  | 0.0446830  | O | -0.0672530 | 0.1186290  | 2.2867300  |
| C | -1.2176420 | 2.3974840  | 0.4760990  | C | 0.8448050  | -0.0920340 | 3.0733420  |
| N | -1.2772770 | 3.6636520  | 0.0247430  |   |            |            |            |
| C | -0.3542920 | 4.6691420  | 0.4954080  |   |            |            |            |
| H | 0.2090240  | 4.2793550  | 1.3530050  |   |            |            |            |
| H | 0.3599260  | 4.9412830  | -0.2988020 |   |            |            |            |

**Table S90.** Geometric coordinates and single point energies for NaHMDS tetrasolvated DMF monomer.

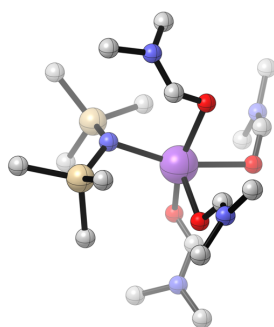

G = -2027.320541 Hartrees

G<sub>SP</sub> = -2029.056022 Hartrees

| Atom | X          | Y          | Z          | Atom | X         | Y          | Z          |
|------|------------|------------|------------|------|-----------|------------|------------|
| Na   | 0.1126930  | 0.6707300  | 0.0350670  | H    | 4.9705760 | 0.2376930  | -1.1039720 |
| N    | -0.9250750 | -1.3034210 | -0.6323590 | H    | 5.4121460 | 1.7668110  | -1.9201980 |
| Si   | 0.1195620  | -2.6242200 | -0.7990910 | H    | 4.5613250 | 1.7972160  | -0.3447240 |
| C    | 1.7224200  | -2.1834210 | -1.7275790 | C    | 3.2694150 | 0.5989370  | -3.2454430 |
| H    | 2.2348810  | -1.3659530 | -1.1913480 | H    | 3.5721300 | -0.4541510 | -3.1451290 |
| H    | 2.4170050  | -3.0347290 | -1.8185590 | H    | 2.2279770 | 0.6368850  | -3.5831960 |
| H    | 1.4771240  | -1.8258470 | -2.7402770 | H    | 3.9184960 | 1.0922740  | -3.9859380 |
| C    | 0.7075200  | -3.2957210 | 0.8901350  | H    | 2.4870850 | 2.2700000  | -0.3949590 |
| H    | 1.4820770  | -4.0667670 | 0.7472810  | O    | 2.1742900 | 0.0807600  | 0.9144130  |
| H    | 1.1444060  | -2.4921320 | 1.5046200  | C    | 1.9704090 | 0.0241620  | 2.1193750  |
| H    | -0.1130480 | -3.7573050 | 1.4633980  | N    | 2.6065860 | -0.8119590 | 2.9641570  |
| C    | -0.6414230 | -4.1236780 | -1.6882650 | C    | 2.2706510 | -0.8575450 | 4.3677080  |
| H    | -1.5430720 | -4.4681210 | -1.1559360 | H    | 1.9051520 | -1.8588410 | 4.6454980  |
| H    | -0.9456240 | -3.8577690 | -2.7135970 | H    | 3.1475690 | -0.6229870 | 4.9914350  |
| H    | 0.0597690  | -4.9708900 | -1.7539250 | H    | 1.4804180 | -0.1258870 | 4.5791060  |
| Si   | -1.9587670 | -0.6521350 | -1.8043870 | C    | 3.6079060 | -1.7378120 | 2.4791620  |
| C    | -1.2282100 | -0.5763700 | -3.5580300 | H    | 3.3198060 | -2.7712110 | 2.7256510  |
| H    | -1.9144040 | -0.1023130 | -4.2781020 | H    | 3.6758940 | -1.6372170 | 1.3901380  |

|   |            |            |            |   |            |            |            |
|---|------------|------------|------------|---|------------|------------|------------|
| H | -0.2995750 | 0.0161520  | -3.5238960 | H | 4.5872960  | -1.5225110 | 2.9351880  |
| H | -0.9803810 | -1.5811820 | -3.9367040 | H | 1.2074970  | 0.6663200  | 2.6047380  |
| C | -2.3117120 | 1.1782110  | -1.3573860 | O | 0.5409910  | 2.7175900  | 1.0738720  |
| H | -1.4397900 | 1.7896580  | -1.6470540 | C | -0.5445110 | 3.1971820  | 1.3676730  |
| H | -3.1845230 | 1.5790060  | -1.8972270 | N | -1.2801800 | 3.9921130  | 0.5692470  |
| H | -2.4878270 | 1.3077350  | -0.2754170 | C | -2.5785350 | 4.4745870  | 0.9764410  |
| C | -3.6468790 | -1.5154280 | -1.9931470 | H | -2.7890910 | 4.1473560  | 2.0027870  |
| H | -3.4988310 | -2.5913400 | -2.1809140 | H | -2.6160570 | 5.5746610  | 0.9429580  |
| H | -4.2819550 | -1.4198590 | -1.0985770 | H | -3.3623390 | 4.0767920  | 0.3123500  |
| H | -4.2082770 | -1.0986730 | -2.8446860 | C | -0.8153140 | 4.3523610  | -0.7562100 |
| O | 1.1314380  | 1.7013100  | -1.7975220 | H | 0.0178940  | 3.6962880  | -1.0372010 |
| C | 2.2737820  | 1.7747890  | -1.3626350 | H | -1.6320310 | 4.2141760  | -1.4790360 |
| N | 3.3656000  | 1.2757680  | -1.9695360 | H | -0.4911470 | 5.4054480  | -0.7820970 |
| C | 4.6456120  | 1.2713510  | -1.3038660 | H | -1.0277120 | 2.9880460  | 2.3429600  |
| H | -3.3066400 | -2.5907420 | 0.5639400  | O | -1.1690740 | 0.4917550  | 2.0496090  |
| H | -2.2670630 | -3.0881340 | 1.9139500  | C | -1.5454350 | -0.6778070 | 2.0113160  |
| C | -3.8831320 | -0.1118820 | 1.7600330  | N | -2.8256290 | -1.0793520 | 1.9450100  |
| H | -4.7488930 | -0.3786210 | 2.3842100  | C | -3.1256260 | -2.4617010 | 1.6424810  |
| H | -3.5092600 | 0.8760210  | 2.0520850  | H | -4.0044670 | -2.7917000 | 2.2156150  |
| H | -4.2020660 | -0.0754150 | 0.7054980  |   |            |            |            |
| H | -0.8350990 | -1.5219450 | 2.0830220  |   |            |            |            |



**Table S91.** Geometric coordinates and single point energies for sodium cation solvated by 4 DMF molecules.

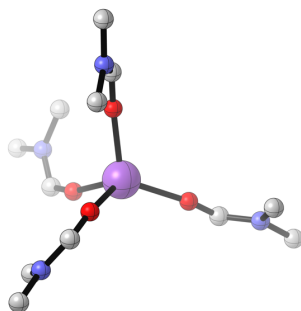

G = -1154.656055 Hartrees

G<sub>SP</sub> = -1155.838722 Hartrees

| Atom | X          | Y          | Z          | Atom | X         | Y          | Z          |
|------|------------|------------|------------|------|-----------|------------|------------|
| Na   | -0.2593880 | -0.1058410 | 0.0416360  | N    | 1.2501780 | 3.4371100  | 1.5894050  |
| O    | 0.4210560  | 0.7981020  | -1.8556000 | C    | 1.6525620 | 4.5794210  | 2.3846840  |
| C    | 0.7805190  | 0.9274670  | -3.0190440 | H    | 1.6808700 | 4.3039840  | 3.4460520  |
| N    | 1.3406980  | -0.0250040 | -3.7752310 | H    | 2.6519320 | 4.9261030  | 2.0827330  |
| C    | 1.7082430  | 0.2209280  | -5.1550070 | H    | 0.9417210 | 5.4090440  | 2.2549160  |
| H    | 1.4729450  | 1.2577530  | -5.4247950 | C    | 1.1525570 | 3.6315330  | 0.1549070  |
| H    | 2.7853840  | 0.0531940  | -5.3023470 | H    | 0.9129250 | 2.6798390  | -0.3330240 |
| H    | 1.1552640  | -0.4520570 | -5.8271300 | H    | 0.3682370 | 4.3687740  | -0.0752880 |
| C    | 1.5768180  | -1.3589540 | -3.2557930 | H    | 2.1100550 | 4.0096980  | -0.2328340 |
| H    | 1.3410270  | -1.3876780 | -2.1858610 | H    | 1.0815660 | 2.2625290  | 3.2563670  |
| H    | 0.9504900  | -2.0908150 | -3.7885890 | O    | 1.0186280 | -1.9015190 | 0.2117960  |
| H    | 2.6323260  | -1.6308170 | -3.4040080 | C    | 1.7094690 | -2.8030650 | 0.6693200  |
| H    | 0.6650190  | 1.8934150  | -3.5527100 | N    | 2.2831190 | -2.8121390 | 1.8790700  |
| O    | -2.4231860 | -0.4729890 | 0.1914570  | C    | 3.0627290 | -3.9431420 | 2.3400440  |
| C    | -3.4744940 | -1.0818030 | 0.3435200  | H    | 3.0981480 | -4.7144750 | 1.5609700  |
| N    | -4.6987370 | -0.5425840 | 0.2811440  | H    | 4.0910010 | -3.6316390 | 2.5759860  |
| C    | -5.8927160 | -1.3399290 | 0.4732080  | H    | 2.6134880 | -4.3774870 | 3.2455550  |
| H    | -5.6162970 | -2.3836020 | 0.6670610  | C    | 2.1247750 | -1.6997000 | 2.7970110  |

|   |            |            |            |   |           |            |           |
|---|------------|------------|------------|---|-----------|------------|-----------|
| H | -6.4736710 | -0.9641500 | 1.3284820  | H | 1.6021020 | -0.8769420 | 2.2960530 |
| H | -6.5289110 | -1.3040760 | -0.4236000 | H | 1.5499040 | -2.0147130 | 3.6813620 |
| C | -4.8796520 | 0.8713380  | 0.0156930  | H | 3.1141800 | -1.3534450 | 3.1302850 |
| H | -3.8965720 | 1.3364450  | -0.1063420 | H | 1.9216320 | -3.7199210 | 0.0813760 |
| H | -5.4697560 | 1.0121680  | -0.9020100 | C | 0.9586680 | 2.2583260  | 2.1536270 |
| H | -5.4115980 | 1.3488520  | 0.8518850  |   |           |            |           |
| H | -3.4889680 | -2.1710930 | 0.5528040  |   |           |            |           |
| O | 0.5953950  | 1.2513020  | 1.5592120  |   |           |            |           |

**Table S92.** Geometric coordinates and single point energies for sodium cation solvated by 5 DMF molecules.

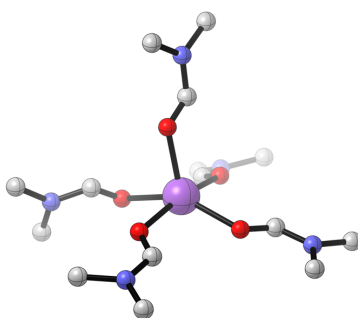

G = -1402.789499 Hartrees

G<sub>SP</sub> = -1404.256287 Hartrees

| Atom | X          | Y          | Z          | Atom | X          | Y          | Z          |
|------|------------|------------|------------|------|------------|------------|------------|
| Na   | 0.0509710  | 0.1844940  | -0.0838240 | C    | 2.5878120  | -3.0585090 | -2.7417350 |
| O    | 2.2707970  | 0.5532900  | -0.0053140 | H    | 2.5062420  | -4.1194960 | -3.0230390 |
| C    | 2.8112340  | 1.6420800  | 0.1314750  | H    | 1.7572590  | -2.4971990 | -3.1812000 |
| N    | 4.1389820  | 1.8472790  | 0.1170670  | H    | 3.5404270  | -2.6667470 | -3.1288920 |
| C    | 4.7078470  | 3.1646350  | 0.2994950  | H    | 1.6297950  | -2.1627140 | 0.3876610  |
| H    | 3.9033380  | 3.8983920  | 0.4336790  | O    | -0.2334670 | -1.0697720 | 1.7652330  |
| H    | 5.3573750  | 3.1887710  | 1.1876790  | C    | -1.3244570 | -1.3888970 | 2.2180660  |
| H    | 5.3066290  | 3.4548470  | -0.5771240 | N    | -1.5204010 | -2.0287420 | 3.3822380  |
| C    | 5.0557320  | 0.7426000  | -0.0756660 | C    | -2.8458450 | -2.3763650 | 3.8460020  |
| H    | 4.4707480  | -0.1672120 | -0.2470090 | H    | -3.5932320 | -2.0427390 | 3.1153670  |
| H    | 5.7030940  | 0.9337880  | -0.9446440 | H    | -2.9397870 | -3.4654330 | 3.9738840  |
| H    | 5.6922110  | 0.6096550  | 0.8125080  | H    | -3.0581180 | -1.8942650 | 4.8122760  |
| H    | 2.2135870  | 2.5652260  | 0.2762230  | C    | -0.4007980 | -2.3911810 | 4.2281300  |
| O    | -0.2946440 | 2.4172480  | 0.0349480  | H    | 0.5209530  | -2.0278320 | 3.7627980  |
| C    | -1.3983240 | 2.9167860  | -0.1485130 | H    | -0.5138550 | -1.9347220 | 5.2227960  |
| N    | -1.6838080 | 4.2236070  | -0.0362690 | H    | -0.3484660 | -3.4838830 | 4.3485780  |
| C    | -3.0160260 | 4.7320410  | -0.2831230 | H    | -2.2639400 | -1.1576370 | 1.6732950  |
| H    | -3.6835980 | 3.9039430  | -0.5517220 | O    | -2.1339620 | -0.1205570 | -0.7081330 |

|   |            |            |            |   |            |            |            |
|---|------------|------------|------------|---|------------|------------|------------|
| H | -3.4141690 | 5.2297040  | 0.6140110  | C | -2.3677240 | -0.9727220 | -1.5623370 |
| H | -3.0072710 | 5.4593430  | -1.1089840 | N | -3.5767060 | -1.2187730 | -2.0897390 |
| C | -0.6640110 | 5.1847340  | 0.3309660  | C | -3.7642320 | -2.2286390 | -3.1104980 |
| H | 0.2714480  | 4.6490470  | 0.5201510  | H | -2.8056280 | -2.7149760 | -3.3284790 |
| H | -0.5127020 | 5.9132420  | -0.4799100 | H | -4.4803900 | -2.9927390 | -2.7727630 |
| H | -0.9640570 | 5.7283510  | 1.2391600  | H | -4.1493550 | -1.7764700 | -4.0368790 |
| H | -2.2690750 | 2.2900080  | -0.4300370 | C | -4.7435350 | -0.4666660 | -1.6765920 |
| O | 0.6266930  | -1.6624730 | -1.3117150 | H | -4.4561800 | 0.2136000  | -0.8683440 |
| C | 1.5478920  | -2.2099770 | -0.7174430 | H | -5.1468020 | 0.1140620  | -2.5203020 |
| N | 2.5342460  | -2.9095790 | -1.3019350 | H | -5.5281750 | -1.1500810 | -1.3190880 |
| C | 3.5766760  | -3.5432580 | -0.5254020 | H | -1.5591220 | -1.6169670 | -1.9605550 |
| H | 3.5703620  | -4.6333620 | -0.6781130 |   |            |            |            |
| H | 4.5661100  | -3.1596280 | -0.8181720 |   |            |            |            |
| H | 3.4206940  | -3.3357270 | 0.5406170  |   |            |            |            |

**Table S93.** Geometric coordinates and single point energies for sodium cation solvated by 6 DMF molecules.

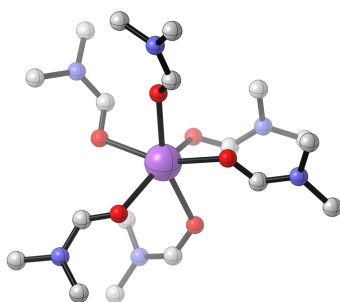

G = -1650.920751 Hartrees

G<sub>SP</sub> = -1652.669205 Hartrees

| Atom | X          | Y          | Z         | Atom | X          | Y          | Z          |
|------|------------|------------|-----------|------|------------|------------|------------|
| Na   | -0.1329780 | -0.1186070 | 0.0697210 | H    | -3.0311850 | -2.2140430 | 2.6590990  |
| O    | 0.9775840  | 1.8861480  | 0.3857050 | H    | -4.4570380 | -1.6652090 | 3.5918770  |
| C    | 1.7177430  | 2.1583550  | 1.3194630 | H    | -4.6836790 | -2.7525540 | 2.1954160  |
| N    | 1.9554890  | 3.4026310  | 1.7712280 | H    | -3.2749470 | 0.6820490  | 0.5498890  |
| C    | 2.8471760  | 3.6539230  | 2.8818000 | H    | -1.7703560 | -3.7755960 | 0.3647610  |
| H    | 3.6798880  | 4.3047370  | 2.5743140 | C    | -1.5647400 | -2.9342100 | -0.3309640 |
| H    | 2.3110700  | 4.1436930  | 3.7088820 | O    | -0.4474830 | -2.4519260 | -0.4427910 |
| H    | 3.2588410  | 2.7043050  | 3.2458830 | N    | -2.6542120 | -2.5423930 | -1.0121530 |
| C    | 1.3052710  | 4.5432360  | 1.1595280 | C    | -3.9460160 | -3.1525610 | -0.7948710 |
| H    | 2.0524840  | 5.2299570  | 0.7326560 | H    | -3.8577940 | -3.9614180 | -0.0579690 |
| H    | 0.6431120  | 4.1790710  | 0.3652470 | H    | -4.6654020 | -2.4072090 | -0.4182320 |
| H    | 0.7151730  | 5.0923750  | 1.9090690 | H    | -4.3406180 | -3.5737600 | -1.7319310 |
| H    | 2.2572170  | 1.3621410  | 1.8727500 | C    | -2.5843750 | -1.4513280 | -1.9661280 |
| O    | 1.8581690  | -0.8929590 | 0.9957840 | H    | -1.5377520 | -1.1601090 | -2.1202210 |
| C    | 2.2597060  | -2.0382790 | 0.8464890 | H    | -3.0266960 | -1.7683340 | -2.9223200 |
| N    | 3.4855200  | -2.4785430 | 1.1992300 | H    | -3.1306740 | -0.5703080 | -1.5938590 |
| C    | 3.8514080  | -3.8722780 | 1.0646520 | O    | -1.6500670 | 1.4350000  | -0.8695230 |
| H    | 3.0521520  | -4.4148870 | 0.5439880 | C    | -1.0127320 | 2.2397850  | -1.5348770 |
| H    | 4.7829970  | -3.9756590 | 0.4867810 | N    | -1.2747240 | 3.5600200  | -1.6087950 |

|   |            |            |            |   |            |            |            |
|---|------------|------------|------------|---|------------|------------|------------|
| H | 4.0064660  | -4.3352590 | 2.0516690  | C | -0.5079750 | 4.4323130  | -2.4698860 |
| C | 4.4366270  | -1.6056800 | 1.8548390  | H | -1.1456000 | 4.8750420  | -3.2508570 |
| H | 4.0242660  | -0.5914060 | 1.8787270  | H | -0.0549620 | 5.2519180  | -1.8901320 |
| H | 4.6276220  | -1.9436090 | 2.8853470  | H | 0.2936170  | 3.8599210  | -2.9530480 |
| H | 5.3924070  | -1.6020570 | 1.3084200  | C | -2.3670690 | 4.1480530  | -0.8646740 |
| H | 1.6158120  | -2.8146570 | 0.3867860  | H | -3.1476000 | 4.5245820  | -1.5441950 |
| O | -1.9343270 | -0.5972890 | 1.3808020  | H | -2.7947240 | 3.3838500  | -0.2076300 |
| C | -3.0735960 | -0.1998780 | 1.1914000  | H | -2.0019310 | 4.9896640  | -0.2560920 |
| N | -4.1808740 | -0.7712840 | 1.7071120  | H | -0.1417960 | 1.9221710  | -2.1399090 |
| C | -5.4968990 | -0.2189660 | 1.4735980  | O | 0.7127210  | -0.2392140 | -2.0797370 |
| H | -5.4225150 | 0.6365020  | 0.7903190  | C | 1.5003990  | -1.1500060 | -2.2808500 |
| H | -6.1613800 | -0.9727470 | 1.0223470  | N | 2.8241190  | -1.0926240 | -2.0448840 |
| H | -5.9535860 | 0.1205700  | 2.4160870  | C | 3.7022860  | -2.1975930 | -2.3537810 |
| C | -4.0831010 | -1.9167180 | 2.5873460  | H | 4.4447600  | -1.9109880 | -3.1144390 |
| H | 2.6232670  | 0.7835420  | -1.1684790 | H | 4.2398650  | -2.5205520 | -1.4479320 |
| H | 4.0396850  | -0.1637870 | -0.6217810 | H | 3.1165610  | -3.0426510 | -2.7383090 |
| H | 4.0606360  | 0.6013270  | -2.2406700 | C | 3.4220260  | 0.1057810  | -1.4925450 |
| H | 1.1682400  | -2.1323730 | -2.6765420 |   |            |            |            |

**Table S94.** Geometric coordinates and single point energies for NaHMDS disolvated DMSO dimer.

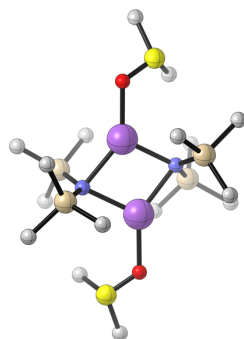

G = -3175.219833 Hartrees

G<sub>SP</sub> = -3177.089036 Hartrees

| Atom | X          | Y          | Z          | Atom | X          | Y          | Z          |
|------|------------|------------|------------|------|------------|------------|------------|
| N    | 1.2135850  | -1.3797500 | 0.0396810  | C    | -0.9788080 | 4.1771320  | -1.1191040 |
| Na   | -1.1065510 | -0.9527140 | 0.3439810  | H    | -0.8493670 | 4.7119990  | -2.0732280 |
| N    | -1.2139620 | 1.3790060  | 0.0392710  | H    | -1.9081640 | 4.5420200  | -0.6531700 |
| Na   | 1.1056330  | 0.9513040  | 0.3432500  | H    | -0.1417950 | 4.4541050  | -0.4589930 |
| O    | 3.0354260  | 2.0006150  | 0.4579470  | O    | -3.0369620 | -2.0000370 | 0.4567720  |
| S    | 4.3875390  | 1.3123560  | 0.2907060  | S    | -4.3888320 | -1.3108290 | 0.2910640  |
| C    | 4.2070470  | 0.3004760  | -1.1861500 | C    | -4.2086230 | -0.2974790 | -1.1847960 |
| H    | 5.1522430  | -0.2122810 | -1.4101830 | H    | -5.1536460 | 0.2161250  | -1.4076300 |
| H    | 3.4213560  | -0.4307830 | -0.9410050 | H    | -3.4222340 | 0.4329510  | -0.9393700 |
| H    | 3.8808600  | 0.9412050  | -2.0169940 | H    | -3.8834410 | -0.9375450 | -2.0165440 |
| C    | 5.4552120  | 2.5997130  | -0.3845660 | C    | -5.4576180 | -2.5968910 | -0.3849020 |
| H    | 5.5761500  | 3.3526300  | 0.4030680  | H    | -5.5785770 | -3.3505000 | 0.4020630  |
| H    | 6.4278660  | 2.1682230  | -0.6536730 | H    | -6.4301540 | -2.1645700 | -0.6530990 |
| H    | 4.9507520  | 3.0387760  | -1.2548350 | H    | -4.9538400 | -3.0353870 | -1.2558500 |
| Si   | -2.0013330 | 1.9080020  | 1.4642830  | Si   | 2.0029480  | -1.9093160 | 1.4634660  |
| C    | -3.7957080 | 2.4802130  | 1.1997350  | C    | 1.0993580  | -3.3070510 | 2.3713930  |
| H    | -4.2110550 | 2.9328890  | 2.1136400  | H    | 1.5695150  | -3.5253610 | 3.3431140  |
| H    | -3.8634280 | 3.2272270  | 0.3926410  | H    | 0.0485970  | -3.0307400 | 2.5618020  |

|    |            |            |            |    |            |            |            |
|----|------------|------------|------------|----|------------|------------|------------|
| H  | -4.4452070 | 1.6314850  | 0.9303760  | H  | 1.0958790  | -4.2346230 | 1.7798820  |
| C  | -2.0955470 | 0.4700260  | 2.7104110  | C  | 2.0973330  | -0.4722030 | 2.7105170  |
| H  | -2.6979820 | -0.3784420 | 2.3480780  | H  | 2.5552980  | -0.8134450 | 3.6516190  |
| H  | -1.0941320 | 0.0840380  | 2.9672830  | H  | 2.6982990  | 0.3771640  | 2.3478090  |
| H  | -2.5519170 | 0.8114420  | 3.6522260  | H  | 1.0957900  | -0.0874510 | 2.9687080  |
| C  | -1.0957920 | 3.3043350  | 2.3724570  | C  | 3.7974390  | -2.4798730 | 1.1962760  |
| H  | -0.0449250 | 3.0275200  | 2.5615270  | H  | 3.8647470  | -3.2267540 | 0.3890260  |
| H  | -1.0926340 | 4.2324020  | 1.7817060  | H  | 4.4457820  | -1.6305150 | 0.9261420  |
| H  | -1.5648610 | 3.5220420  | 3.3448440  | H  | 4.2144550  | -2.9322180 | 2.1095890  |
| Si | -1.0157030 | 2.2999370  | -1.3918870 | Si | 1.0154100  | -2.3001620 | -1.3918670 |
| C  | 0.6613570  | 1.8868410  | -2.2101440 | C  | 0.9790700  | -4.1775430 | -1.1201590 |
| H  | 1.5045850  | 2.3341950  | -1.6553130 | H  | 0.8494760  | -4.7115400 | -2.0747600 |
| H  | 0.8324290  | 0.7990940  | -2.2857640 | H  | 1.9087300  | -4.5425670 | -0.6549350 |
| H  | 0.6985010  | 2.2966840  | -3.2311590 | H  | 0.1423850  | -4.4554470 | -0.4600320 |
| C  | -2.3243990 | 2.0082150  | -2.7391110 | C  | 2.3241690  | -2.0078460 | -2.7389600 |
| H  | -3.3299350 | 2.2916830  | -2.3886670 | H  | 3.3298540  | -2.2903280 | -2.3881530 |
| H  | -2.0944190 | 2.6282510  | -3.6198880 | H  | 2.0949420  | -2.6284400 | -3.6195380 |
| H  | -2.3582950 | 0.9585320  | -3.0705590 | H  | 2.3572960  | -0.9582650 | -3.0708450 |
| H  | -0.8323950 | -0.7990470 | -2.2854120 | C  | -0.6615790 | -1.8868480 | -2.2100670 |
| H  | -0.6986050 | -2.2963990 | -3.2312020 | H  | -1.5050390 | -2.3341280 | -1.6555370 |



**Table S95.** Geometric coordinates and single point energies for NaHMDS tetrasolvated DMSO dimer.

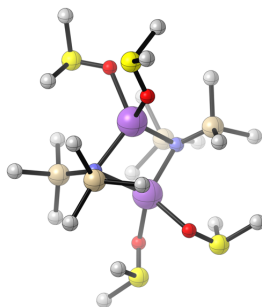

G = -4280.807505 Hartrees

G<sub>SP</sub> = -4283.353401 Hartrees

| Atom   | X          | Y          | Z          | Atom | X          | Y          | Z          |
|--------|------------|------------|------------|------|------------|------------|------------|
| Symbol | X          | Y          | Z          | C    | -2.1434550 | -2.6520600 | 2.2750430  |
| Na     | -1.2890680 | 0.3272850  | -0.1293630 | H    | -2.5570860 | -3.5050200 | 1.7132830  |
| N      | 0.4881110  | 1.8371020  | -0.7444510 | H    | -2.2221270 | -2.8832250 | 3.3499240  |
| Na     | 1.6227730  | -0.1128830 | -0.0156030 | H    | -2.7561140 | -1.7617190 | 2.0667080  |
| N      | -0.1700940 | -1.7971110 | 0.1495010  | C    | 0.6413120  | -3.8459130 | 2.2987640  |
| Si     | -0.2077350 | -2.8978000 | -1.1579960 | H    | 0.0266200  | -4.4914350 | 2.9459330  |
| C      | -1.1544370 | -4.5256260 | -0.8317170 | H    | 0.9561680  | -4.4523480 | 1.4350250  |
| H      | -1.0957750 | -5.1710970 | -1.7234110 | H    | 1.5450940  | -3.5821400 | 2.8702810  |
| H      | -0.7233170 | -5.0851930 | 0.0129000  | O    | 3.6004440  | -0.9166230 | -0.8790060 |
| H      | -2.2206830 | -4.3682720 | -0.6079720 | S    | 4.5441170  | -1.6136780 | 0.1005290  |
| C      | -1.0619010 | -2.1382370 | -2.6926060 | C    | 3.4830890  | -2.5088100 | 1.2507020  |
| H      | -2.0580410 | -2.5813110 | -2.8563720 | H    | 4.0660850  | -3.2727170 | 1.7821890  |
| S      | -4.0312380 | -0.6966080 | -1.8303560 | H    | 3.0955140  | -1.7559770 | 1.9483810  |
| O      | -3.3680710 | 0.4474550  | -1.0670740 | H    | 2.6681210  | -2.9533810 | 0.6639920  |
| C      | -3.9521760 | -2.1003030 | -0.7002290 | C    | 5.1680490  | -3.0311600 | -0.8300800 |
| H      | -4.3458450 | -2.9990270 | -1.1939410 | H    | 5.7326590  | -2.6201410 | -1.6752330 |
| H      | -2.8858260 | -2.2293280 | -0.4610970 | H    | 5.8236530  | -3.6345590 | -0.1890530 |
| H      | -4.5038780 | -1.8577010 | 0.2171840  | H    | 4.3093410  | -3.6092720 | -1.1951550 |
| C      | -5.7988810 | -0.3512350 | -1.6819710 | O    | 3.1084770  | 0.5482800  | 1.6235270  |

|    |            |            |            |    |            |            |            |
|----|------------|------------|------------|----|------------|------------|------------|
| H  | -5.9951250 | 0.5543300  | -2.2684930 | S  | 4.2351420  | 1.5498260  | 1.3629160  |
| H  | -6.3765970 | -1.1951220 | -2.0808610 | C  | 4.0119190  | 2.1237780  | -0.3346170 |
| H  | -6.0225110 | -0.1794170 | -0.6204920 | H  | 4.6381390  | 3.0107600  | -0.5003580 |
| H  | -1.1845380 | -1.0453570 | -2.6117950 | H  | 4.3121270  | 1.2895610  | -0.9808610 |
| H  | -0.4797080 | -2.3195960 | -3.6095720 | H  | 2.9392090  | 2.3346220  | -0.4791590 |
| C  | 1.5054770  | -3.4983400 | -1.7270730 | C  | 3.7375670  | 3.0579990  | 2.2202970  |
| H  | 2.2067460  | -2.6566900 | -1.8431780 | H  | 3.6756260  | 2.8003040  | 3.2844800  |
| H  | 1.9195240  | -4.2049920 | -0.9865900 | H  | 4.5017760  | 3.8291550  | 2.0563620  |
| H  | 1.4343130  | -4.0346020 | -2.6868130 | H  | 2.7565080  | 3.3780760  | 1.8488690  |
| Si | -0.3382360 | -2.2764610 | 1.7860580  | Si | 0.5981900  | 1.8468930  | -2.4519810 |
| C  | 0.2051040  | -0.8953390 | 2.9571070  | C  | -1.0919170 | 1.8572120  | -3.3281850 |
| H  | 1.2295050  | -0.5343310 | 2.7634050  | H  | -0.9863160 | 1.6804500  | -4.4106190 |
| H  | -0.4773830 | -0.0365410 | 2.8592750  | H  | -1.7839150 | 1.1049920  | -2.9184520 |
| H  | 0.1646590  | -1.2402850 | 4.0033200  | H  | -1.5760640 | 2.8373380  | -3.1888150 |
| H  | 0.9520150  | 4.2650150  | -3.0770320 | C  | 1.5481120  | 0.3133740  | -3.0398020 |
| H  | 2.5070620  | 3.4854530  | -2.7061350 | H  | 1.5100630  | 0.2197320  | -4.1367170 |
| H  | 1.7048390  | 3.1797440  | -4.2670630 | H  | 2.6069980  | 0.3602230  | -2.7397710 |
| Si | 0.1231800  | 3.1931250  | 0.2256700  | H  | 1.1396120  | -0.6205350 | -2.6217400 |
| C  | -1.6320580 | 3.8613020  | -0.0837940 | C  | 1.5288780  | 3.3339040  | -3.1902800 |
| H  | -1.9395580 | 4.6029980  | 0.6718140  | H  | -0.7581910 | 2.2211260  | 2.3344580  |
| H  | -1.7087910 | 4.3310670  | -1.0773670 | H  | 1.0053160  | 2.0269520  | 2.2825530  |
| H  | -2.3428130 | 3.0202030  | -0.0571870 | H  | 0.2890300  | 3.6119440  | 2.7122810  |
| C  | 1.2506580  | 4.7187140  | -0.0256490 | O  | -2.5112710 | 0.7756910  | 1.7066210  |
| H  | 0.9967520  | 5.2296030  | -0.9665910 | S  | -4.0209590 | 0.6170570  | 1.7646900  |
| H  | 1.1011160  | 5.4411810  | 0.7936980  | C  | -4.3881070 | 0.7731790  | 3.5254920  |
| H  | 2.3243900  | 4.4811460  | -0.0740330 | H  | -5.4737220 | 0.7824400  | 3.6879770  |
| C  | 0.1826200  | 2.7262380  | 2.0641350  | H  | -3.9357870 | -0.1010380 | 4.0097900  |
| H  | -4.4926320 | 2.2371580  | 0.1358490  | H  | -3.9135410 | 1.6919290  | 3.8931620  |
| H  | -5.7843860 | 2.2116670  | 1.4066200  | C  | -4.7034220 | 2.1914470  | 1.2114350  |
| H  | -4.1789700 | 2.9995180  | 1.7381260  |    |            |            |            |

**Table S96.** Geometric coordinates and single point energies for NaHMDS disolvated DMSO monomer.

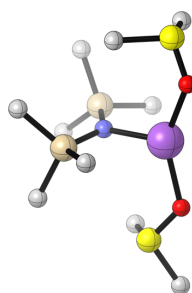

G = -2140.395238 Hartrees

G<sub>SP</sub> = -2141.674509 Hartrees

| Atom | X          | Y          | Z          | Atom | X          | Y          | Z          |
|------|------------|------------|------------|------|------------|------------|------------|
| Na   | 0.0396930  | 1.6126480  | -0.1515750 | H    | -3.1291000 | -1.5644060 | -1.1292490 |
| N    | -0.1149770 | -0.6656670 | 0.0289360  | H    | -2.6070770 | -3.1109420 | -1.8278910 |
| Si   | 0.3002350  | -1.0373460 | 1.6344690  | O    | -1.8781810 | 2.6199800  | 0.0881630  |
| C    | 1.9784810  | -1.9118190 | 1.8460780  | S    | -3.2979950 | 2.0736090  | 0.1653660  |
| H    | 2.8124260  | -1.2496850 | 1.5647060  | C    | -3.5747030 | 1.3039650  | -1.4447010 |
| H    | 2.1378440  | -2.2117760 | 2.8941350  | H    | -4.5531450 | 0.8062500  | -1.4594100 |
| H    | 2.0351950  | -2.8173770 | 1.2219550  | H    | -3.5463260 | 2.1129040  | -2.1845540 |
| C    | 0.4490340  | 0.5853260  | 2.6235340  | H    | -2.7613800 | 0.5869340  | -1.6214120 |
| H    | 0.6859390  | 0.3943650  | 3.6815230  | C    | -3.1874790 | 0.5559590  | 1.1373500  |
| H    | 1.2584130  | 1.2212240  | 2.2240860  | H    | -3.0117850 | 0.8589980  | 2.1772820  |
| H    | -0.4840910 | 1.1727350  | 2.5954030  | H    | -4.1341010 | 0.0039580  | 1.0606810  |
| C    | -0.9519870 | -2.1409480 | 2.5456510  | H    | -2.3320730 | -0.0268510 | 0.7520190  |
| H    | -1.9682550 | -1.7167550 | 2.5201610  | O    | 2.1633210  | 2.0642580  | -0.3866930 |
| H    | -0.9982780 | -3.1347230 | 2.0707220  | S    | 3.2677970  | 1.0828100  | -0.0110450 |
| H    | -0.6721950 | -2.2885960 | 3.6007080  | C    | 3.1103880  | -0.2894620 | -1.1659760 |
| Si   | -0.5885410 | -1.7349450 | -1.2008190 | H    | 3.9233750  | -1.0079570 | -0.9956520 |
| C    | 0.4616890  | -3.3165970 | -1.3190110 | H    | 2.1316430  | -0.7347470 | -0.9266530 |
| H    | 0.1547040  | -3.9457900 | -2.1694320 | H    | 3.1218010  | 0.1108760  | -2.1885440 |
| H    | 1.5319590  | -3.0840950 | -1.4403160 | C    | 4.7603510  | 1.8385430  | -0.6886830 |

|   |            |            |            |   |            |            |            |
|---|------------|------------|------------|---|------------|------------|------------|
| H | 0.3569350  | -3.9192460 | -0.4020040 | H | 4.9350810  | 2.7564440  | -0.1152880 |
| C | -0.4489170 | -0.8811200 | -2.8953340 | H | 5.6081880  | 1.1504810  | -0.5780080 |
| H | 0.6046250  | -0.6480150 | -3.1183480 | H | 4.5686330  | 2.0810860  | -1.7417540 |
| H | -0.8307590 | -1.5152640 | -3.7105810 | H | -2.5259230 | -2.8520520 | -0.0676730 |
| H | -1.0027710 | 0.0717990  | -2.9269180 |   |            |            |            |
| C | -2.3806800 | -2.3678120 | -1.0467270 |   |            |            |            |

**Table S97.** Geometric coordinates and single point energies for NaHMDS trisolvated DMSO monomer.

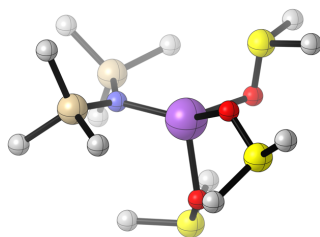

G = -2693.187629 Hartrees

G<sub>SP</sub> = -2694.803643 Hartrees

| Atom | X          | Y          | Z          | Atom | X          | Y          | Z          |
|------|------------|------------|------------|------|------------|------------|------------|
| Na   | -0.5022200 | 0.1122760  | 0.1269820  | C    | -3.0278720 | 2.8852130  | 0.0925800  |
| N    | 1.7548910  | 0.1332950  | 0.4203770  | H    | -2.1488970 | 2.8881010  | -0.5641620 |
| Si   | 2.0457750  | 1.5219630  | 1.3537820  | H    | -3.8506370 | 3.4608550  | -0.3519400 |
| C    | 3.4966470  | 2.5886630  | 0.7353290  | H    | -2.7783230 | 3.2393190  | 1.1014680  |
| H    | 3.3429860  | 2.9120370  | -0.3067250 | O    | -1.0286820 | 1.4161700  | -1.6156470 |
| H    | 3.6393850  | 3.4898400  | 1.3527400  | S    | -0.1961260 | 1.2453120  | -2.8896600 |
| H    | 4.4340570  | 2.0095380  | 0.7652320  | C    | 1.4402650  | 1.8859770  | -2.4773560 |
| C    | 0.4971610  | 2.6360770  | 1.3011140  | H    | 2.1184630  | 1.6999950  | -3.3213780 |
| H    | 0.6712120  | 3.5901130  | 1.8229410  | H    | 1.3246690  | 2.9645890  | -2.3126570 |
| H    | 0.2074650  | 2.8599260  | 0.2609730  | H    | 1.7719540  | 1.3702560  | -1.5567700 |
| H    | -0.3620650 | 2.1462260  | 1.7924400  | C    | 0.2496460  | -0.5030220 | -2.9452790 |
| C    | 2.3781760  | 1.2098470  | 3.1972540  | H    | -0.6866360 | -1.0732590 | -2.9690020 |
| H    | 1.5684210  | 0.6021600  | 3.6313230  | H    | 0.8522360  | -0.6845540 | -3.8453070 |
| H    | 3.3224180  | 0.6647250  | 3.3473890  | H    | 0.8090260  | -0.7470740 | -2.0310520 |
| H    | 2.4385300  | 2.1547870  | 3.7609200  | O    | -1.3074930 | -1.8612760 | -0.6657370 |
| Si   | 2.8221010  | -1.1485970 | 0.1247960  | S    | -1.5188280 | -2.7438760 | 0.5587210  |
| C    | 3.8257030  | -0.9155900 | -1.4815160 | C    | -3.2990040 | -2.6970430 | 0.8480690  |
| H    | 4.5374730  | -1.7400970 | -1.6470730 | H    | -3.5718690 | -3.4061490 | 1.6402670  |
| H    | 3.1731360  | -0.8565290 | -2.3677010 | H    | -3.4903520 | -1.6632650 | 1.1609500  |
| H    | 4.3999650  | 0.0240200  | -1.4312850 | H    | -3.8074080 | -2.9237460 | -0.0982910 |

|   |            |            |            |   |            |            |            |
|---|------------|------------|------------|---|------------|------------|------------|
| C | 1.8772570  | -2.7909530 | -0.0844140 | C | -1.3944260 | -4.4312050 | -0.0690430 |
| H | 1.0915490  | -2.6922140 | -0.8503230 | H | -0.3396880 | -4.5841930 | -0.3282530 |
| H | 2.5451390  | -3.6208830 | -0.3649780 | H | -1.7046210 | -5.1411190 | 0.7084930  |
| H | 1.3900190  | -3.0467430 | 0.8723750  | H | -2.0265690 | -4.5042560 | -0.9635190 |
| C | 4.1140600  | -1.4747710 | 1.4790680  | S | -3.5286120 | 1.1575500  | 0.2102650  |
| H | 4.7659810  | -0.5983400 | 1.6258620  | C | -4.9438550 | 1.3959990  | 1.3120690  |
| H | 3.6239620  | -1.6898540 | 2.4415580  | H | -5.7121190 | 1.9993020  | 0.8115320  |
| H | 4.7566790  | -2.3319220 | 1.2218840  | H | -5.3415420 | 0.4011120  | 1.5463600  |
| O | -2.4985850 | 0.4790720  | 1.1141670  | H | -4.5815070 | 1.8814370  | 2.2274500  |

**Table S98.** Geometric coordinates and single point energies for NaHMDS tetrasolvated DMSO monomer.

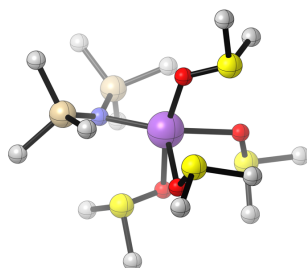

G = -3245.975952 Hartrees

G<sub>SP</sub> = -3247.927531 Hartrees

| Atom | X          | Y          | Z          | Atom | X          | Y          | Z          |
|------|------------|------------|------------|------|------------|------------|------------|
| Na   | 0.0887620  | 0.1423070  | -0.0969850 | C    | 2.7374890  | 3.9915630  | 1.0862290  |
| N    | -2.2386230 | 0.4157640  | -0.0777250 | H    | 2.6948920  | 3.7832290  | 2.1618840  |
| Si   | -2.7173490 | 0.7493970  | 1.5021650  | H    | 3.7066820  | 4.4313450  | 0.8172020  |
| C    | -4.0042000 | -0.4929470 | 2.1696600  | H    | 1.9019340  | 4.6442530  | 0.8021250  |
| H    | -3.5774090 | -1.5091740 | 2.2098940  | O    | 2.1032590  | -0.0358720 | -1.3470360 |
| H    | -4.3368960 | -0.2335580 | 3.1877000  | S    | 1.8542960  | -1.2085280 | -2.3038630 |
| H    | -4.8923540 | -0.5260600 | 1.5181680  | C    | 3.2474770  | -1.1080720 | -3.4540480 |
| C    | -1.2450590 | 0.5976390  | 2.7117890  | H    | 3.2718310  | -2.0072830 | -4.0837850 |
| H    | -1.5576520 | 0.7804410  | 3.7528230  | H    | 3.0837170  | -0.2206430 | -4.0773980 |
| H    | -0.8178170 | -0.4171810 | 2.6480190  | H    | 4.1737860  | -0.9999750 | -2.8744850 |
| H    | -0.4554390 | 1.3234890  | 2.4517340  | C    | 2.3888090  | -2.6681110 | -1.3906880 |
| C    | -3.4554120 | 2.4756660  | 1.7976810  | H    | 1.8224080  | -2.6106590 | -0.4518360 |
| H    | -2.7343570 | 3.2498410  | 1.4894990  | H    | 2.1099610  | -3.5648220 | -1.9590800 |
| H    | -4.3749040 | 2.6225630  | 1.2100490  | H    | 3.4725110  | -2.6179740 | -1.2189880 |
| H    | -3.6990050 | 2.6360170  | 2.8603780  | O    | -0.4402330 | -1.9929970 | -0.9132450 |
| Si   | -2.5046690 | 1.0354760  | -1.6208860 | S    | -1.3304460 | -2.3387230 | 0.2864120  |
| C    | -3.0254080 | -0.2943070 | -2.8785780 | C    | -2.9333030 | -2.7494460 | -0.4168790 |
| H    | -3.0534940 | 0.1127400  | -3.9022270 | H    | -3.5371850 | -3.2733530 | 0.3359720  |
| H    | -2.2909070 | -1.1160110 | -2.8511350 | H    | -3.3752670 | -1.7760850 | -0.6622740 |

|   |            |            |            |   |            |            |            |
|---|------------|------------|------------|---|------------|------------|------------|
| H | -4.0209990 | -0.7120490 | -2.6568200 | H | -2.7716930 | -3.3604930 | -1.3147740 |
| C | -0.8865300 | 1.7454460  | -2.3622330 | C | -0.7818620 | -4.0151360 | 0.6987750  |
| H | -0.1330430 | 0.9517330  | -2.5143870 | H | 0.2216280  | -3.8933830 | 1.1255810  |
| H | -1.0550730 | 2.2267210  | -3.3388890 | H | -1.4557140 | -4.4612420 | 1.4421830  |
| H | -0.4614280 | 2.4901800  | -1.6700050 | H | -0.7455260 | -4.6133620 | -0.2214080 |
| C | -3.7803430 | 2.4380310  | -1.7536650 | O | 1.1929040  | -1.3200490 | 1.3881300  |
| H | -4.7634180 | 2.1026670  | -1.3859760 | S | 2.1567470  | -0.4542020 | 2.1892210  |
| H | -3.4775990 | 3.3055570  | -1.1468510 | C | 2.4078260  | -1.3738370 | 3.7231130  |
| H | -3.9038500 | 2.7722960  | -2.7963860 | H | 3.2146100  | -0.9156050 | 4.3098450  |
| O | 1.0796820  | 2.0270110  | 0.5868250  | H | 1.4590450  | -1.3125770 | 4.2703700  |
| S | 2.5090360  | 2.4056080  | 0.2476770  | H | 2.6342130  | -2.4170700 | 3.4670210  |
| C | 2.4796410  | 3.0259600  | -1.4458910 | C | 3.7618180  | -0.7634810 | 1.4197760  |
| H | 3.4748230  | 3.4086140  | -1.7092420 | H | 3.6369110  | -0.4076480 | 0.3864070  |
| H | 2.2137010  | 2.1543040  | -2.0550180 | H | 4.5461940  | -0.1991760 | 1.9416580  |
| H | 1.7096500  | 3.8043810  | -1.5216480 | H | 3.9600840  | -1.8439690 | 1.4383000  |



**Table S99.** Geometric coordinates and single point energies for sodium cation solvated by 3 DMSO molecules.

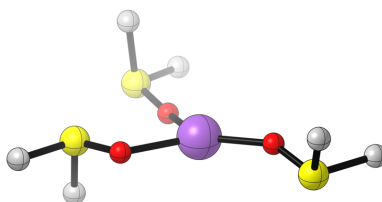

G = -1820.502293 Hartrees

G<sub>SP</sub> = -1821.570515 Hartrees

| Atom | X          | Y          | Z          | Atom | X          | Y         | Z          |
|------|------------|------------|------------|------|------------|-----------|------------|
| Na   | 0.6108080  | 0.0915100  | 0.0733800  | S    | -2.2038360 | 1.6812570 | -0.1425140 |
| O    | -1.1788710 | -1.1242040 | 0.3765970  | C    | -2.6282660 | 1.5290110 | 1.6036030  |
| S    | -2.5399530 | -1.7363210 | 0.0543350  | H    | -3.7191490 | 1.5414830 | 1.7260460  |
| C    | -2.5840610 | -1.8785960 | -1.7418980 | H    | -2.2117930 | 0.5651520 | 1.9214390  |
| H    | -3.4876660 | -2.4237880 | -2.0441770 | H    | -2.1517110 | 2.3558920 | 2.1460500  |
| H    | -2.6142360 | -0.8541370 | -2.1325310 | C    | -2.7979130 | 3.3588250 | -0.4198760 |
| H    | -1.6740030 | -2.3943260 | -2.0749190 | H    | -2.5199290 | 3.6233770 | -1.4468320 |
| C    | -2.3640280 | -3.4824960 | 0.4594090  | H    | -3.8882950 | 3.3928120 | -0.2998250 |
| H    | -2.2210480 | -3.5370740 | 1.5450310  | H    | -2.2895840 | 4.0224330 | 0.2909770  |
| H    | -3.2770000 | -4.0193160 | 0.1713120  | C    | 4.8510880  | 0.8782820 | -1.1437920 |
| H    | -1.4815360 | -3.8747880 | -0.0617690 | H    | 4.3071620  | 1.7943090 | -1.4031310 |
| O    | 2.7201850  | -0.1739040 | 0.0025740  | H    | 5.9134330  | 1.1040790 | -0.9849580 |
| S    | 4.1296270  | 0.2657660  | 0.3899780  | H    | 4.7103750  | 0.1162050 | -1.9209280 |
| C    | 5.0564940  | -1.2741630 | 0.5170170  | O    | -0.6854980 | 1.8156320 | -0.1753730 |
| H    | 6.1189590  | -1.0514700 | 0.6789970  |      |            |           |            |
| H    | 4.6493900  | -1.8142640 | 1.3798480  |      |            |           |            |
| H    | 4.8979000  | -1.8498070 | -0.4037680 |      |            |           |            |

**Table S100.** Geometric coordinates and single point energies for sodium cation solvated by 4 DMSO molecules.

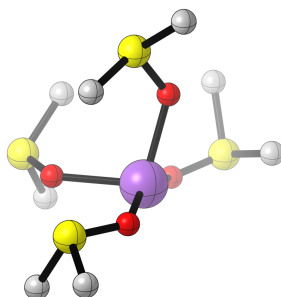

G = -2373.308057 Hartrees

G<sub>SP</sub> = -2374.711214 Hartrees

| Atom | X          | Y          | Z          | Atom | X          | Y          | Z          |
|------|------------|------------|------------|------|------------|------------|------------|
| Na   | -0.0729290 | 0.1166760  | -0.8421200 | H    | -1.6362570 | -2.2155700 | 0.5444660  |
| O    | -2.1122770 | -0.5282360 | -1.2684920 | C    | 0.5550670  | -3.9282400 | 1.1238180  |
| S    | -3.3807440 | -0.1258790 | -0.5156270 | H    | 1.6045310  | -4.2155010 | 0.9892470  |
| C    | -3.5708100 | 1.6457090  | -0.7798950 | H    | 0.1142380  | -4.4929190 | 1.9553090  |
| H    | -4.5469730 | 1.9668990  | -0.3939520 | H    | -0.0063210 | -4.0762160 | 0.1923460  |
| H    | -2.7547910 | 2.1055360  | -0.2104120 | O    | -0.8954450 | 1.2933690  | 0.8700470  |
| H    | -3.4763680 | 1.8474880  | -1.8549260 | S    | -0.0988030 | 2.2260180  | 1.7948000  |
| C    | -4.7140790 | -0.6966130 | -1.5868830 | C    | 1.4081980  | 1.3082390  | 2.1726170  |
| H    | -4.6654100 | -1.7917580 | -1.5961270 | H    | 2.1092220  | 1.9664870  | 2.7029960  |
| H    | -5.6800840 | -0.3638690 | -1.1860770 | H    | 1.1223910  | 0.4715080  | 2.8233290  |
| H    | -4.5365240 | -0.3027550 | -2.5956850 | H    | 1.8151430  | 0.9479720  | 1.2169170  |
| O    | 1.0518510  | -1.4907830 | 0.2366710  | C    | 0.6324030  | 3.4647350  | 0.7063130  |
| S    | 0.5425140  | -2.1696350 | 1.5144110  | H    | -0.2016650 | 4.0348940  | 0.2792910  |
| C    | -1.2406980 | -1.9071810 | 1.5221730  | H    | 1.2635170  | 4.1318780  | 1.3083470  |
| H    | -1.6826890 | -2.4750020 | 2.3515690  | H    | 1.2066020  | 2.9482760  | -0.0775960 |
| H    | -1.3947970 | -0.8260580 | 1.6555410  | O    | 1.8594520  | 1.1384970  | -1.1687150 |
| H    | 3.2415870  | -0.8200890 | 0.2268070  | S    | 3.1800140  | 0.5669380  | -1.6968780 |
| C    | 2.7305970  | -0.9756580 | -2.5216220 | C    | 3.9832760  | -0.1688060 | -0.2568740 |

|   |           |            |            |   |           |            |            |
|---|-----------|------------|------------|---|-----------|------------|------------|
| H | 2.1104280 | -0.7033570 | -3.3848800 | H | 4.8731160 | -0.7209010 | -0.5869090 |
| H | 3.6445010 | -1.4748450 | -2.8696920 | H | 4.2843280 | 0.6578980  | 0.3981230  |
| H | 2.1744340 | -1.5983840 | -1.8059800 |   |           |            |            |

**Table S101.** Geometric coordinates and single point energies for sodium cation solvated by 5 DMSO molecules.

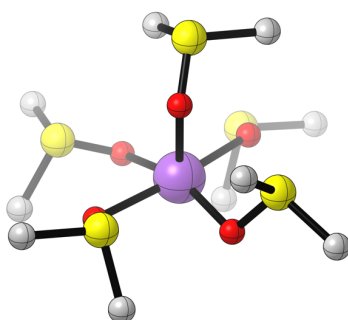

G = -2926.111957 Hartrees

G<sub>SP</sub> = -2927.852845 Hartrees

| Atom | X         | Y          | Z          | Atom | X          | Y          | Z          |
|------|-----------|------------|------------|------|------------|------------|------------|
| Na   | 0.0363420 | -0.0136200 | -0.4566180 | H    | -2.4503520 | 4.3376190  | -0.4184360 |
| O    | 1.4335160 | -1.7807080 | -0.4854950 | C    | -3.2252920 | 1.9677000  | -1.7460050 |
| S    | 2.9099230 | -1.6955660 | -0.8817910 | H    | -3.0061230 | 0.9881290  | -2.1880990 |
| C    | 3.2997460 | -3.3711170 | -1.4283340 | H    | -4.3046330 | 2.0944170  | -1.5872260 |
| H    | 4.3140140 | -3.3995780 | -1.8468780 | H    | -2.8104940 | 2.7827530  | -2.3529640 |
| H    | 3.2409910 | -4.0160890 | -0.5436380 | O    | -1.9244160 | -0.8162020 | -1.2143490 |
| H    | 2.5490940 | -3.6757300 | -2.1687150 | S    | -2.4158120 | -2.0018410 | -0.3827620 |
| C    | 2.9361480 | -0.8952590 | -2.4967570 | C    | -3.6994320 | -1.3220360 | 0.6831790  |
| H    | 2.6622760 | 0.1493220  | -2.3077790 | H    | -4.1982430 | -2.1367960 | 1.2248050  |
| H    | 3.9479920 | -0.9634430 | -2.9172480 | H    | -3.1661490 | -0.6556570 | 1.3721830  |
| H    | 2.1995720 | -1.3945890 | -3.1400550 | H    | -4.4119550 | -0.7658230 | 0.0592040  |
| O    | 2.0080970 | 1.0938510  | -0.3543290 | C    | -3.4755800 | -2.9138320 | -1.5232520 |
| S    | 1.9587910 | 2.4266430  | 0.3974420  | H    | -2.8203340 | -3.3156650 | -2.3050340 |
| C    | 3.6969510 | 2.7917970  | 0.7199660  | H    | -3.9773170 | -3.7331970 | -0.9924140 |
| H    | 3.7927750 | 3.7876730  | 1.1714760  | H    | -4.2000660 | -2.2156160 | -1.9616530 |
| H    | 4.0559770 | 2.0253640  | 1.4175230  | O    | -0.8623020 | -0.4229290 | 1.5772650  |
| H    | 4.2478520 | 2.7262580  | -0.2270430 | S    | -0.1099720 | -1.0180650 | 2.7673730  |
| C    | 1.6573780 | 3.6753240  | -0.8633500 | C    | 0.2164820  | -2.7334550 | 2.3095790  |

|   |            |           |            |   |            |            |           |
|---|------------|-----------|------------|---|------------|------------|-----------|
| H | 0.6330950  | 3.4851150 | -1.2061230 | H | 0.8142480  | -3.2090990 | 3.0983590 |
| H | 1.7437540  | 4.6727930 | -0.4128140 | H | -0.7626460 | -3.2222540 | 2.2363660 |
| H | 2.3872660  | 3.5348890 | -1.6710150 | H | 0.7245430  | -2.7289860 | 1.3340940 |
| O | -0.8903160 | 2.0343020 | -0.5124590 | C | 1.5778160  | -0.3925130 | 2.6131140 |
| S | -2.3765370 | 1.9570640 | -0.1568960 | H | 1.5297700  | 0.6796770  | 2.8440930 |
| C | -2.7774100 | 3.6390980 | 0.3625720  | H | 2.2252850  | -0.9060690 | 3.3360660 |
| H | -3.8558120 | 3.7248770 | 0.5484130  | H | 1.8982340  | -0.5518190 | 1.5732790 |
| H | -2.2221350 | 3.8188280 | 1.2908700  |   |            |            |           |

**Table S102.** Geometric coordinates and single point energies for NaHMDS TMEDA disolvated dimer. The green bond indicates a minor N–Na contact. This contact is an angstrom longer than the other N–Na bonds.

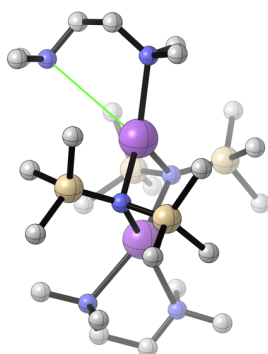

G = -2763.842314 Hartrees

G<sub>SP</sub> = -2765.821037 Hartrees

| Atom | X          | Y          | Z          | Atom | X          | Y          | Z          |
|------|------------|------------|------------|------|------------|------------|------------|
| N    | 0.2894380  | 1.8569280  | 0.0388730  | H    | -0.6427280 | 5.0783660  | 0.1551780  |
| Na   | 1.7377060  | -0.0981030 | -0.1733730 | H    | -1.9749690 | 4.1378710  | 0.8462750  |
| Na   | -1.3054120 | 0.1157010  | 0.4197330  | H    | -0.9459960 | 5.1337020  | 1.9018090  |
| N    | 0.1844440  | -1.7404070 | 0.6075800  | N    | -3.6728600 | 0.4986390  | 1.2226660  |
| Si   | 0.7675580  | -1.9289830 | 2.2063620  | C    | -3.6926060 | -0.0062020 | 2.5918350  |
| C    | 1.4443530  | -3.6487050 | 2.6421990  | H    | -3.6970140 | -1.1051010 | 2.5906820  |
| H    | 1.8945710  | -3.6358180 | 3.6474910  | H    | -2.8017320 | 0.3295580  | 3.1384310  |
| H    | 0.6413320  | -4.4029420 | 2.6492060  | H    | -4.5885500 | 0.3480840  | 3.1420420  |
| H    | 2.2138340  | -3.9846190 | 1.9297930  | C    | -4.8902030 | 0.0454580  | 0.5487680  |
| C    | 2.2024680  | -0.7161240 | 2.5230000  | C    | -5.0134900 | 0.3934500  | -0.9274660 |
| H    | 3.1088800  | -1.0125360 | 1.9729030  | N    | -4.1531620 | -0.3710100 | -1.8117440 |
| H    | 1.9506580  | 0.3176890  | 2.2304320  | C    | -4.5116040 | -1.7790070 | -1.8189650 |
| H    | 2.4626490  | -0.6939410 | 3.5927750  | H    | -3.9517280 | -2.2947750 | -2.6081870 |
| C    | -0.5184530 | -1.5481960 | 3.5513630  | H    | -4.2556450 | -2.2659800 | -0.8692360 |
| H    | -0.7871040 | -0.4807700 | 3.5451800  | H    | -5.5963680 | -1.9234970 | -2.0154000 |
| H    | -1.4365480 | -2.1377850 | 3.4022440  | C    | -4.2167020 | 0.1574550  | -3.1627050 |
| H    | -0.1247360 | -1.7791880 | 4.5539720  | H    | -3.9725670 | 1.2277170  | -3.1641600 |

|    |            |            |            |   |            |            |            |
|----|------------|------------|------------|---|------------|------------|------------|
| Si | -0.6928940 | -2.9516530 | -0.2197400 | H | -3.4859840 | -0.3618450 | -3.7996100 |
| C  | -1.2423070 | -2.3471080 | -1.9335270 | H | -5.2248820 | 0.0298860  | -3.6125320 |
| H  | -1.8517990 | -1.4280870 | -1.8884020 | H | -4.8025710 | 1.4630800  | -1.0805180 |
| H  | -0.3814990 | -2.1467030 | -2.5876960 | H | -6.0818800 | 0.2483010  | -1.2077540 |
| H  | -1.8491360 | -3.1255500 | -2.4225900 | H | -4.9653430 | -1.0442300 | 0.6817500  |
| C  | 0.1891240  | -4.6052300 | -0.5430020 | H | -5.7705470 | 0.4820350  | 1.0685600  |
| H  | 0.5835640  | -5.0507270 | 0.3816210  | C | -3.6022510 | 1.9559180  | 1.2385390  |
| H  | -0.5264910 | -5.3194320 | -0.9812050 | H | -2.7575610 | 2.2805530  | 1.8592770  |
| H  | 1.0264060  | -4.5088960 | -1.2513450 | H | -3.4396520 | 2.3532610  | 0.2282890  |
| C  | -2.2909940 | -3.4139380 | 0.7130910  | H | -4.5274350 | 2.4056550  | 1.6559850  |
| H  | -2.9309200 | -4.1076190 | 0.1445840  | N | 4.2255150  | 0.7172960  | -0.1100640 |
| H  | -2.0541940 | -3.8894380 | 1.6789450  | C | 4.8563070  | 1.0618930  | 1.1532290  |
| H  | -2.8786890 | -2.5044690 | 0.9313070  | H | 4.1686360  | 1.6626510  | 1.7627140  |
| Si | 0.0860090  | 2.2983340  | -1.6024060 | H | 5.1006570  | 0.1507500  | 1.7167870  |
| C  | -1.7442840 | 2.5483500  | -2.0527510 | H | 5.7899190  | 1.6431960  | 1.0037500  |
| H  | -2.3242550 | 1.6481710  | -1.7813010 | C | 5.0941540  | -0.1442540 | -0.8997310 |
| H  | -2.1625390 | 3.4078450  | -1.5048440 | C | 4.3784280  | -0.8495650 | -2.0443960 |
| H  | -1.8876170 | 2.7269930  | -3.1304170 | N | 3.1800540  | -1.5626590 | -1.6287830 |
| C  | 0.6761810  | 0.8763950  | -2.7222140 | C | 3.4551170  | -2.5696940 | -0.6145860 |
| H  | 1.7690360  | 0.7355080  | -2.6883200 | H | 2.5161210  | -3.0682760 | -0.3400610 |
| H  | 0.2080020  | -0.0784270 | -2.4312710 | H | 4.1818760  | -3.3304410 | -0.9711120 |
| H  | 0.4073450  | 1.0643580  | -3.7733350 | H | 3.8573470  | -2.1057510 | 0.2960950  |
| C  | 0.9995630  | 3.8559060  | -2.1881650 | C | 2.5367900  | -2.1776120 | -2.7767640 |
| H  | 0.8204430  | 4.0244760  | -3.2619450 | H | 1.6200030  | -2.6861330 | -2.4520080 |
| H  | 0.6567390  | 4.7525900  | -1.6499870 | H | 2.2664500  | -1.4126270 | -3.5184980 |
| H  | 2.0867460  | 3.7752120  | -2.0373160 | H | 3.1954910  | -2.9254490 | -3.2663430 |
| Si | 0.2773920  | 3.0277880  | 1.2904320  | H | 5.1062200  | -1.5403640 | -2.5250800 |
| C  | -0.1637510 | 2.2618380  | 2.9747380  | H | 4.0860730  | -0.1236950 | -2.8209460 |
| H  | -1.1001340 | 1.6820770  | 2.9559100  | H | 5.9498100  | 0.4267740  | -1.3203320 |
| H  | -0.2893610 | 3.0541510  | 3.7296550  | H | 5.5318370  | -0.8952670 | -0.2257820 |
| H  | 0.6254720  | 1.5848840  | 3.3344980  | C | 3.8699770  | 1.9269650  | -0.8370620 |

|   |            |           |           |   |           |           |            |
|---|------------|-----------|-----------|---|-----------|-----------|------------|
| C | 1.9340280  | 3.9079610 | 1.5929950 | H | 3.4075770 | 1.6771180 | -1.8012780 |
| H | 1.8240450  | 4.6613320 | 2.3889890 | H | 3.1374870 | 2.5070200 | -0.2607600 |
| H | 2.7186010  | 3.2043720 | 1.9104770 | H | 4.7577820 | 2.5633990 | -1.0376900 |
| H | 2.2855880  | 4.4273870 | 0.6872710 |   |           |           |            |
| C | -0.9417060 | 4.4694590 | 1.0228540 |   |           |           |            |



**Table S103.** Geometric coordinates and single point energies for NaHMDS TMEDA monosolvated monomer.

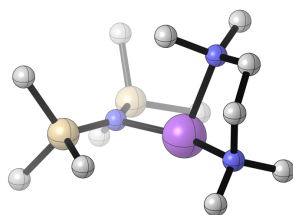

G = -1381.908281 Hartrees

G<sub>SP</sub> = -1382.900732 Hartrees

| Atom | X          | Y          | Z          | Atom | X          | Y          | Z          |
|------|------------|------------|------------|------|------------|------------|------------|
| C    | 3.2668390  | 0.8802470  | 1.0446370  | H    | -3.2824980 | -3.6157140 | -0.1571140 |
| Na   | 0.7280570  | 0.0315630  | -0.7263800 | N    | 1.8482010  | 1.2113230  | 1.0654780  |
| N    | -1.3998540 | -0.1369700 | -0.1886050 | C    | 1.6336330  | 2.6441380  | 1.2009940  |
| Si   | -2.2265060 | 1.2791450  | -0.5813690 | H    | 2.0557450  | 3.0393500  | 2.1474400  |
| C    | -2.7208780 | 2.3365340  | 0.9190330  | H    | 2.0991580  | 3.1806750  | 0.3613430  |
| H    | -1.8481160 | 2.5759660  | 1.5481470  | H    | 0.5553540  | 2.8551720  | 1.1899070  |
| H    | -3.1980080 | 3.2845020  | 0.6238300  | C    | 1.1319500  | 0.4979300  | 2.1197400  |
| H    | -3.4327220 | 1.7823750  | 1.5513250  | H    | 1.4768750  | 0.8099470  | 3.1264720  |
| C    | -1.0555920 | 2.3666170  | -1.6367690 | H    | 0.0526600  | 0.6791050  | 2.0172240  |
| H    | -1.5089080 | 3.3286260  | -1.9214300 | H    | 1.2826780  | -0.5870860 | 2.0258860  |
| H    | -0.1217500 | 2.6040260  | -1.0953510 | N    | 3.0231030  | -0.7058350 | -0.8828430 |
| H    | -0.7904340 | 1.8423340  | -2.5716580 | C    | 3.5601760  | -0.4989650 | 0.4616750  |
| C    | -3.8019970 | 1.0496790  | -1.6101750 | H    | 3.1368490  | -1.2814070 | 1.1107840  |
| H    | -3.5947080 | 0.4490580  | -2.5094030 | H    | 4.6613230  | -0.6483550 | 0.4677230  |
| H    | -4.5696050 | 0.5171880  | -1.0267590 | C    | 3.5768590  | 0.2365340  | -1.8453410 |
| H    | -4.2300380 | 2.0135240  | -1.9281430 | H    | 3.2703840  | 1.2660810  | -1.6090950 |
| Si   | -1.7634560 | -1.6770410 | 0.3934470  | H    | 4.6853250  | 0.2028090  | -1.8740090 |
| C    | -2.1878040 | -1.7471590 | 2.2437870  | H    | 3.2034380  | -0.0028400 | -2.8508330 |
| H    | -2.3854790 | -2.7756670 | 2.5852490  | C    | 3.2558080  | -2.0790150 | -1.3110960 |
| H    | -1.3688980 | -1.3370170 | 2.8560350  | H    | 2.7884340  | -2.7752330 | -0.6014910 |

|   |            |            |            |   |           |            |            |
|---|------------|------------|------------|---|-----------|------------|------------|
| H | -3.0861650 | -1.1440130 | 2.4504340  | H | 2.8047750 | -2.2457100 | -2.2992610 |
| C | -0.2029340 | -2.7693240 | 0.1749550  | H | 4.3375160 | -2.3128660 | -1.3775150 |
| H | 0.6607420  | -2.3511400 | 0.7244140  | H | 3.7900040 | 1.6475190  | 0.4541600  |
| H | -0.3498000 | -3.7956260 | 0.5455990  | H | 3.7074220 | 0.9252410  | 2.0628170  |
| H | 0.0706790  | -2.8422530 | -0.8924710 |   |           |            |            |
| C | -3.1617710 | -2.5804090 | -0.5133530 |   |           |            |            |
| H | -4.1198410 | -2.0585390 | -0.3630820 |   |           |            |            |
| H | -2.9674360 | -2.6071570 | -1.5968130 |   |           |            |            |

**Table S104.** Geometric coordinates and single point energies for LiHMDS TMEDA monosolvated monomer.

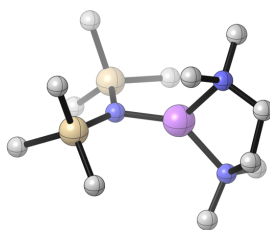

G = -1227.22675 Hartrees

G<sub>SP</sub> = -1228.175576 Hartrees

| Atom | X          | Y          | Z          | Atom | X          | Y          | Z          |
|------|------------|------------|------------|------|------------|------------|------------|
| Si   | -1.8625680 | 1.4667750  | -0.2308920 | H    | 2.8119630  | 1.9180000  | -0.1930850 |
| N    | -1.0443340 | 0.0220390  | 0.1301950  | H    | 4.2825040  | 1.2386510  | 0.5282370  |
| Si   | -1.6486850 | -1.5374270 | 0.4144440  | C    | 2.1378010  | 1.5724710  | 2.2257430  |
| C    | -2.8545790 | -1.7089640 | 1.8651180  | H    | 3.0568030  | 1.9389240  | 2.7245990  |
| H    | -3.1011140 | -2.7644400 | 2.0618060  | H    | 1.6573830  | 2.4095520  | 1.7032740  |
| H    | -2.4197690 | -1.2785820 | 2.7805840  | H    | 1.4407060  | 1.2076800  | 2.9920540  |
| H    | -3.7949140 | -1.1744370 | 1.6618350  | C    | 3.0234820  | -0.6421740 | 1.9591940  |
| C    | -0.1419910 | -2.6332050 | 0.8696200  | H    | 4.0380090  | -0.4113880 | 2.3420770  |
| H    | 0.3182820  | -2.2947070 | 1.8150210  | H    | 2.3904760  | -0.9308790 | 2.8088740  |
| H    | -0.4371740 | -3.6829330 | 1.0188810  | H    | 3.0915810  | -1.5092070 | 1.2865820  |
| H    | 0.6347690  | -2.6356540 | 0.0837100  | C    | -3.5365100 | 1.6472440  | 0.6421090  |
| C    | -2.4803360 | -2.3467960 | -1.0861350 | H    | -3.4308890 | 1.5094010  | 1.7294520  |
| H    | -3.3881020 | -1.7855420 | -1.3609440 | H    | -3.9826560 | 2.6378390  | 0.4609610  |
| H    | -1.8106650 | -2.3338150 | -1.9608590 | H    | -4.2488510 | 0.8893600  | 0.2772580  |
| H    | -2.7764960 | -3.3896650 | -0.8919310 | C    | -0.8111830 | 2.9643020  | 0.2888740  |
| Li   | 0.7933120  | -0.2570730 | 0.2625170  | H    | -1.2746420 | 3.9170290  | -0.0110510 |
| N    | 2.4279370  | 0.5018210  | 1.2789010  | H    | -0.6818140 | 2.9782370  | 1.3827380  |
| C    | 3.2608590  | 0.9833880  | 0.1774390  | H    | 0.1917030  | 2.9263950  | -0.1716500 |
| C    | 3.3613350  | -0.0323640 | -0.9567210 | C    | -2.2234330 | 1.6989660  | -2.0841820 |
| N    | 2.0448050  | -0.4874830 | -1.3972210 | H    | -1.2988040 | 1.8299690  | -2.6682070 |

|   |           |            |            |   |            |            |            |
|---|-----------|------------|------------|---|------------|------------|------------|
| C | 1.3715870 | 0.5024830  | -2.2354670 | H | -2.7491110 | 0.8178780  | -2.4854470 |
| H | 1.2621460 | 1.4568250  | -1.7003720 | H | -2.8565620 | 2.5824320  | -2.2638830 |
| H | 1.9313160 | 0.6849040  | -3.1744540 | H | 3.9403560  | 0.4111310  | -1.7917950 |
| H | 0.3577600 | 0.1512210  | -2.4673040 | H | 1.0967070  | -2.1013400 | -2.3391680 |
| C | 2.1131250 | -1.7672190 | -2.0885000 | H | 2.7018020  | -1.7013810 | -3.0249580 |
| H | 2.5743330 | -2.5243820 | -1.4385040 | H | 3.9307700  | -0.9101620 | -0.6172990 |

**Table S105.** Geometric coordinates and single point energies for NaHMDS TMEDA disolvated monomer.

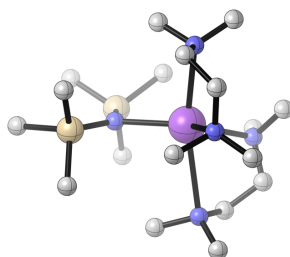

G = -1729.011139 Hartrees

G<sub>SP</sub> = -1730.397455 Hartrees

| Atom | X          | Y          | Z          | Atom | X          | Y          | Z          |
|------|------------|------------|------------|------|------------|------------|------------|
| C    | -2.7932070 | 2.3183800  | 1.3684070  | H    | -0.2474570 | 3.0177790  | 0.4454610  |
| Si   | -2.7528500 | 0.4136820  | 1.2077110  | H    | 0.6357370  | 4.3171890  | -0.3627140 |
| N    | -1.6979470 | -0.1468230 | -0.0035590 | C    | -0.7330300 | 2.5746980  | -1.9326990 |
| Si   | -2.1014710 | -1.0643830 | -1.3743310 | H    | -1.0139120 | 3.6410400  | -2.0599790 |
| C    | -3.8392750 | -0.8494080 | -2.1119010 | H    | -0.7557130 | 2.0941110  | -2.9179300 |
| H    | -3.8725630 | -1.3201120 | -3.1080950 | H    | -1.4624550 | 2.0654270  | -1.2862370 |
| H    | -4.6246410 | -1.3093150 | -1.4957210 | C    | 1.5987560  | 2.8823600  | -2.3189540 |
| H    | -4.0855470 | 0.2178060  | -2.2338570 | H    | 1.5185080  | 2.2771430  | -3.2332450 |
| C    | -1.9167830 | -2.9463480 | -1.1243470 | H    | 1.4590070  | 3.9480620  | -2.5994170 |
| H    | -2.5279670 | -3.2828010 | -0.2711620 | H    | 2.6164770  | 2.7631220  | -1.9238530 |
| H    | -2.2446800 | -3.5025420 | -2.0172210 | N    | 2.4020790  | -1.2223570 | -1.3786770 |
| H    | -0.8752360 | -3.2404730 | -0.9150530 | C    | 2.9930610  | -2.0159110 | -0.3022580 |
| C    | -0.9630070 | -0.6440380 | -2.8619760 | C    | 1.9367050  | -2.7745720 | 0.4977490  |
| H    | -1.4597010 | 0.1046990  | -3.4980050 | N    | 1.4448540  | -1.9918590 | 1.6251450  |
| H    | 0.0184860  | -0.2284610 | -2.5778610 | C    | 0.1150270  | -2.4256800 | 2.0379140  |
| H    | -0.7866200 | -1.5342620 | -3.4865630 | H    | -0.1711400 | -1.8929780 | 2.9543090  |
| Na   | 0.6145730  | 0.1040710  | -0.1754120 | H    | -0.6292870 | -2.1726720 | 1.2684450  |
| N    | 0.6030360  | 2.4449360  | -1.3562500 | H    | 0.0866890  | -3.5149570 | 2.2507940  |
| C    | 0.6663010  | 3.2303690  | -0.1284820 | C    | 2.3650360  | -2.0941580 | 2.7442570  |

|   |            |            |           |   |            |            |            |
|---|------------|------------|-----------|---|------------|------------|------------|
| C | 1.8944960  | 2.9655450  | 0.7298550 | H | 2.0754170  | -1.3998550 | 3.5469180  |
| N | 1.9541230  | 1.6155700  | 1.2784710 | H | 2.3807330  | -3.1203460 | 3.1677590  |
| C | 3.2776100  | 1.3346740  | 1.8041600 | H | 3.3910550  | -1.8492040 | 2.4339840  |
| H | 3.3066090  | 0.3109970  | 2.1989230 | H | 2.3323930  | -3.7532470 | 0.8423800  |
| H | 4.0350490  | 1.4275020  | 1.0119900 | H | 1.0852650  | -2.9986690 | -0.1607500 |
| H | 3.5547530  | 2.0287510  | 2.6250990 | H | 3.5227780  | -1.3294430 | 0.3762800  |
| C | 0.9540220  | 1.4098080  | 2.3186320 | H | 3.7532150  | -2.7111210 | -0.7159640 |
| H | 1.0099540  | 0.3712830  | 2.6721040 | C | 3.2959580  | -0.1525490 | -1.7909070 |
| H | 1.1035670  | 2.0957320  | 3.1783170 | H | 4.2858390  | -0.5330360 | -2.1183420 |
| H | -0.0602520 | 1.5634910  | 1.9266180 | H | 2.8458160  | 0.3992330  | -2.6267390 |
| H | 1.9188100  | 3.7189120  | 1.5466440 | H | 3.4448070  | 0.5499000  | -0.9571270 |
| H | 2.8066870  | 3.1292110  | 0.1354450 | C | 2.0821530  | -2.0740320 | -2.5172180 |
| H | -5.0423480 | 0.3945220  | 0.1255540 | H | 1.6633610  | -1.4724540 | -3.3324280 |
| C | -2.3406110 | -0.1871810 | 2.9698830 | H | 2.9854750  | -2.5991290 | -2.8906830 |
| H | -3.0287970 | 0.2840940  | 3.6900370 | H | 1.3292200  | -2.8261210 | -2.2432540 |
| H | -2.4705410 | -1.2780780 | 3.0500870 | C | -4.5820280 | -0.0680580 | 1.0110920  |
| H | -1.3140420 | 0.0550170  | 3.2847160 | H | -4.7011690 | -1.1597930 | 0.9207750  |
| H | -1.8725870 | 2.7417310  | 1.8019710 | H | -5.1490010 | 0.2589600  | 1.8973370  |
| H | -2.9611190 | 2.8021090  | 0.3930730 | H | -3.6188610 | 2.6166380  | 2.0342400  |

**Table S106** Geometric coordinates and single point energies for NaHMDS (R,R)-TMCDA disolvated dimer.

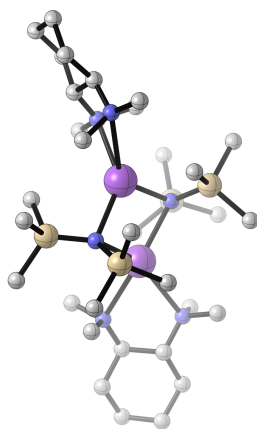

G = -3075.385111 Hartrees

G<sub>SP</sub> = -3077.699253 Hartrees

| Atom | X          | Y          | Z          | Atom | X          | Y          | Z          |
|------|------------|------------|------------|------|------------|------------|------------|
| Na   | 1.5988980  | -0.1281490 | -0.0283950 | H    | 5.3039760  | -3.0361640 | 0.2825190  |
| N    | -0.0101300 | -1.9520580 | -0.2816790 | H    | 4.5983840  | -2.1100120 | 1.6384630  |
| Na   | -1.5205070 | -0.0276390 | -0.1702010 | H    | 3.5555580  | -3.0911840 | 0.6042160  |
| N    | -0.0234350 | 1.8474340  | -0.3993980 | H    | 5.0025660  | -2.2593210 | -2.0057870 |
| Si   | 0.4836080  | 2.2835070  | -1.9805710 | H    | 3.2510170  | -2.4600910 | -1.7320280 |
| C    | 1.4448130  | 3.9209550  | -2.1310130 | H    | 3.8740730  | -0.9029770 | -2.3162510 |
| H    | 1.7525850  | 4.0730030  | -3.1780540 | H    | 1.5144130  | -3.8234440 | -2.6407110 |
| H    | 0.8144080  | 4.7788840  | -1.8490900 | C    | -1.5594540 | -4.1636630 | -1.7275650 |
| H    | 2.3503350  | 3.9560650  | -1.5080300 | H    | -0.9932950 | -5.0066100 | -1.3017650 |
| C    | 1.6705630  | 0.9430630  | -2.6334490 | H    | -2.4713520 | -4.0362110 | -1.1252890 |
| H    | 2.6203840  | 0.9745470  | -2.0706610 | H    | -1.8676770 | -4.4568750 | -2.7438840 |
| H    | 1.2453590  | -0.0706160 | -2.5455370 | H    | -1.8501390 | -1.6153460 | -3.7002470 |
| H    | 1.9245640  | 1.0989700  | -3.6929310 | H    | -1.0451860 | -0.3290960 | -2.7840050 |
| C    | -0.9039350 | 2.5041820  | -3.2612860 | H    | -4.1403790 | -2.8169000 | 1.1249520  |
| H    | -1.5401240 | 1.6163230  | -3.3901400 | H    | -3.8052450 | -1.9822110 | -0.4320650 |
| H    | -1.5511230 | 3.3437880  | -2.9599880 | H    | -2.4639690 | -2.5138420 | 0.5957040  |

|    |            |            |            |    |            |            |            |
|----|------------|------------|------------|----|------------|------------|------------|
| H  | -0.4752720 | 2.7532210  | -4.2450400 | H  | -5.3719920 | -0.8004090 | 3.2202750  |
| H  | -3.9040160 | 0.4255170  | -3.1789060 | H  | -6.0492420 | -1.6946080 | 1.8509550  |
| C  | -4.7389850 | 0.2250500  | -2.4921720 | H  | -6.7791010 | 1.1623110  | 2.7022050  |
| N  | -4.3064210 | 0.4579080  | -1.1286170 | H  | -7.7901130 | -0.2710610 | 2.9143350  |
| C  | -5.3067130 | 0.0722830  | -0.1363350 | H  | -8.4805310 | 1.0813750  | 0.9005990  |
| C  | -6.5428210 | 0.9858890  | -0.0737650 | H  | -7.9657890 | -0.5489360 | 0.4520750  |
| C  | -7.6080830 | 0.4126030  | 0.8588290  | H  | -6.2414860 | 1.9841500  | 0.2869530  |
| C  | -7.0369470 | 0.1864180  | 2.2558680  | H  | -6.9549900 | 1.1224440  | -1.0849790 |
| C  | -5.7820020 | -0.6845590 | 2.2063780  | H  | -5.6656110 | -0.9261250 | -0.4440370 |
| C  | -4.7137930 | -0.0798660 | 1.2775150  | H  | -5.0349470 | -0.8274410 | -2.6194240 |
| H  | -4.4951830 | 0.9334100  | 1.6657230  | H  | -5.5886260 | 0.8674370  | -2.8006290 |
| N  | -3.4321730 | -0.7933990 | 1.2681170  | Si | 0.5102960  | -3.0197190 | 0.9539200  |
| C  | -2.8468300 | -0.9181160 | 2.5953400  | C  | 1.4761440  | -2.0077780 | 2.2467940  |
| H  | -3.3073710 | -1.7280590 | 3.1946960  | H  | 2.3564410  | -1.4998000 | 1.8208200  |
| H  | -1.7723720 | -1.1437530 | 2.5053130  | H  | 0.8139920  | -1.2351680 | 2.6756800  |
| H  | -2.9529030 | 0.0255600  | 3.1474590  | H  | 1.8337070  | -2.6334400 | 3.0793680  |
| C  | -3.4773360 | -2.0925020 | 0.6100880  | C  | 1.5711690  | -4.4802180 | 0.3322890  |
| H  | -2.5242700 | -1.1019960 | -2.1441040 | H  | 2.1658580  | -4.9244420 | 1.1470290  |
| C  | -1.5815610 | -1.2864970 | -2.6846970 | H  | 0.9032120  | -5.2700820 | -0.0461920 |
| Si | -0.5069930 | -2.5798460 | -1.8032790 | H  | 2.2539810  | -4.2144660 | -0.4866680 |
| C  | 0.8801650  | -3.0106310 | -3.0272120 | C  | -0.8168420 | -3.9498530 | 1.9549300  |
| H  | 0.4411460  | -3.3574450 | -3.9764650 | H  | -1.4679680 | -4.5397460 | 1.2902700  |
| H  | 1.5274270  | -2.1503350 | -3.2544490 | H  | -0.3076170 | -4.6585050 | 2.6284250  |
| C  | 4.0850860  | -1.7489340 | -1.6466580 | H  | -1.4574000 | -3.3072830 | 2.5744010  |
| N  | 4.1863390  | -1.2945520 | -0.2696680 | H  | -0.8098400 | 1.4780590  | 2.6201160  |
| C  | 5.1567330  | -0.2060830 | -0.0882540 | H  | -1.7670220 | 2.9509110  | 2.9102540  |
| C  | 4.8610200  | 0.5876960  | 1.1996750  | C  | -1.7416640 | 4.3686310  | -0.0500910 |
| C  | 5.9214830  | 1.6743070  | 1.4490290  | H  | -2.1629700 | 4.9914370  | 0.7555890  |
| C  | 7.3455700  | 1.1288170  | 1.4349140  | H  | -1.1731280 | 5.0415700  | -0.7119760 |
| C  | 7.6207510  | 0.4507110  | 0.0965370  | H  | -2.5773470 | 3.9652850  | -0.6367090 |
| C  | 6.6210660  | -0.6801340 | -0.1229560 | H  | 1.3540770  | 4.6857010  | 0.7515050  |



|    |            |            |            |   |            |            |            |
|----|------------|------------|------------|---|------------|------------|------------|
| H  | 6.8159480  | -1.1954110 | -1.0762600 | H | 0.2229230  | 4.9384060  | 2.0972360  |
| H  | 6.7740410  | -1.4243190 | 0.6755440  | H | 1.8624570  | 1.5055570  | 2.4596160  |
| H  | 7.5335530  | 1.1945930  | -0.7140440 | H | 3.0545850  | 0.3562670  | 3.1130760  |
| H  | 8.6476430  | 0.0582320  | 0.0574620  | H | 3.4130650  | 2.1148630  | 3.0909670  |
| H  | 8.0624000  | 1.9425100  | 1.6193200  | C | 3.3277400  | 2.3309050  | 0.4217950  |
| H  | 7.4788040  | 0.3962630  | 2.2495990  | H | 3.7403330  | 3.2237820  | 0.9323460  |
| H  | 5.8460860  | 2.4386790  | 0.6591800  | H | 3.8233860  | 2.2348600  | -0.5550970 |
| H  | 5.7028910  | 2.1828250  | 2.4013880  | H | 2.2600960  | 2.5077190  | 0.2456620  |
| H  | 4.9199380  | -0.1254540 | 2.0397660  | H | 5.0085900  | 0.4843250  | -0.9388350 |
| N  | 3.4870070  | 1.1085510  | 1.1973550  | C | 4.4307080  | -2.4345170 | 0.6027760  |
| C  | 2.9386080  | 1.2816030  | 2.5319880  | H | -2.3804030 | 1.6912750  | 1.8193360  |
| H  | 1.4252860  | 3.6358650  | 2.1854280  | H | -3.4949170 | 1.9760810  | 0.0790330  |
| C  | 0.7430180  | 4.1668710  | 1.5067260  | C | -3.7882690 | 1.7999620  | -0.9647500 |
| Si | -0.5735460 | 3.0562020  | 0.6905600  | H | -4.5109370 | 2.5929840  | -1.2500650 |
| C  | -1.4702120 | 2.2210640  | 2.1413410  | H | -2.8905110 | 1.9326550  | -1.5872020 |

**Table S107.** Geometric coordinates and single point energies for NaHMDS (R,R)-TMCDA monosolvated dimer. The starting geometry for this computation started as a monosolvated open dimer but collapsed to a closed dimer.

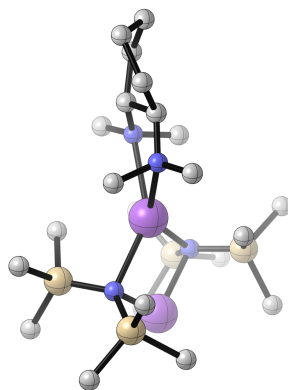

G = -2572.497021 Hartrees

G<sub>SP</sub> = -2574.25027 Hartrees

| Atom | X          | Y          | Z          | Atom | X         | Y          | Z          |
|------|------------|------------|------------|------|-----------|------------|------------|
| C    | -3.6380980 | 0.2869740  | -0.6929680 | H    | 0.1949330 | -4.2603770 | 1.5595810  |
| Na   | -0.2067990 | 0.0248270  | -0.0239540 | H    | 1.3830400 | -4.2851770 | 2.8852870  |
| C    | -3.6496980 | -0.2793310 | 0.7339290  | C    | 3.2962860 | -4.1843530 | 0.3819640  |
| N    | -2.3785740 | -0.9171940 | 1.0982830  | H    | 4.1651870 | -3.7668170 | -0.1505140 |
| C    | -2.3482010 | -1.2740820 | 2.5075290  | H    | 3.6749060 | -4.7894520 | 1.2207340  |
| H    | -1.3284090 | -1.5617680 | 2.7948470  | H    | 2.7762810 | -4.8639640 | -0.3109310 |
| H    | -2.6398970 | -0.4081330 | 3.1199360  | C    | 3.2803580 | -1.7580740 | 2.1619750  |
| H    | -3.0235530 | -2.1178970 | 2.7514010  | H    | 2.7587470 | -0.8875490 | 2.5940480  |
| C    | -2.0184060 | -2.0629690 | 0.2744460  | H    | 3.6386630 | -2.3617910 | 3.0097270  |
| H    | -2.0185820 | -1.7862860 | -0.7899260 | H    | 4.1914540 | -1.4040690 | 1.6434620  |
| H    | -0.9986500 | -2.3881970 | 0.5299440  | N    | 1.3822150 | 1.8538910  | 0.1452130  |
| H    | -2.6896270 | -2.9347550 | 0.4034520  | Si   | 2.0864450 | 2.8175050  | -1.0787500 |
| H    | -3.7536690 | 0.5798850  | 1.4191520  | C    | 2.7009190 | 4.5268260  | -0.5351750 |
| C    | -4.8823360 | -1.1961520 | 0.9453890  | H    | 3.3530210 | 4.4793660  | 0.3502950  |
| H    | -5.1673320 | -1.1544470 | 2.0076190  | H    | 3.2696850 | 5.0056580  | -1.3476280 |
| H    | -4.6029090 | -2.2408110 | 0.7429430  | H    | 1.8520040 | 5.1844500  | -0.2924800 |

|    |            |            |            |    |            |            |            |
|----|------------|------------|------------|----|------------|------------|------------|
| C  | -6.0880830 | -0.8087640 | 0.0797660  | C  | 0.9775140  | 3.1470650  | -2.5782450 |
| C  | -6.1189400 | 0.7021520  | -0.1164400 | H  | 0.7131290  | 2.2214260  | -3.1117790 |
| C  | -4.9061410 | 1.1439100  | -0.9452730 | H  | 0.0453080  | 3.6531560  | -2.2816130 |
| H  | -4.6826210 | 2.2010660  | -0.7381370 | H  | 1.4981990  | 3.8027590  | -3.2938410 |
| H  | -5.1559420 | 1.0868530  | -2.0155220 | C  | 3.6196630  | 1.9153180  | -1.7963720 |
| H  | -6.1047010 | 1.1896000  | 0.8723470  | H  | 4.4050540  | 1.7677550  | -1.0318590 |
| H  | -7.0479650 | 1.0247250  | -0.6075160 | H  | 3.3606140  | 0.9363990  | -2.2404080 |
| H  | -6.0212320 | -1.2941450 | -0.9078600 | H  | 4.0849150  | 2.5005920  | -2.6038500 |
| H  | -7.0163860 | -1.1732820 | 0.5419810  | Si | 1.2854880  | 2.2620080  | 1.8035600  |
| N  | -2.3872600 | 0.9883010  | -1.0104700 | C  | 2.9845800  | 2.3215770  | 2.6618780  |
| C  | -2.3412400 | 1.3832120  | -2.4102660 | H  | 2.8862690  | 2.5514820  | 3.7346330  |
| H  | -1.3319420 | 1.7337860  | -2.6602000 | H  | 3.5260410  | 1.3626620  | 2.5887840  |
| H  | -2.5739000 | 0.5205270  | -3.0519000 | H  | 3.6246630  | 3.0970690  | 2.2130030  |
| H  | -3.0543240 | 2.1968580  | -2.6491550 | C  | 0.4286470  | 3.9011480  | 2.2092900  |
| C  | -2.1009090 | 2.1310990  | -0.1519810 | H  | 0.2748900  | 4.0043960  | 3.2950400  |
| H  | -1.1008050 | 2.5204450  | -0.3945010 | H  | 1.0297090  | 4.7590780  | 1.8733360  |
| H  | -2.8273040 | 2.9600750  | -0.2604310 | H  | -0.5550480 | 3.9667070  | 1.7185850  |
| H  | -2.0830420 | 1.8230910  | 0.9032350  | C  | 0.2967520  | 0.9089860  | 2.7068020  |
| H  | -3.6764670 | -0.5733490 | -1.3840420 | H  | 0.6624080  | -0.1060770 | 2.4690180  |
| Na | 2.8230310  | 0.0458770  | 0.0553540  | H  | 0.3616820  | 1.0297470  | 3.7991490  |
| N  | 1.4894000  | -1.7936190 | -0.1924370 | H  | -0.7712020 | 0.9464560  | 2.4389100  |
| Si | 1.2305200  | -2.2896840 | -1.8112620 | H  | -0.7573590 | -3.8151580 | -1.5321350 |
| C  | 0.2682540  | -0.9209680 | -2.7164790 | H  | 0.0760730  | -4.1323740 | -3.0729210 |
| H  | 0.7623270  | 0.0577290  | -2.5839180 | C  | 2.8257940  | -2.5308480 | -2.8113970 |
| H  | 0.2130330  | -1.1164850 | -3.7982360 | H  | 2.6049740  | -2.7565530 | -3.8666220 |
| H  | -0.7682110 | -0.8243370 | -2.3543130 | H  | 3.4535030  | -1.6243960 | -2.7910420 |
| C  | 0.2316610  | -3.8909990 | -2.0096260 | H  | 3.4255000  | -3.3607500 | -2.4085660 |
| H  | 0.7558240  | -4.7430590 | -1.5492040 | Si | 2.1598900  | -2.8031260 | 1.0156590  |
| H  | 0.2934280  | -2.8939080 | 2.6976300  | C  | 0.8889230  | -3.6366710 | 2.1453460  |

**Table S108.** Geometric coordinates and single point energies for NaHMDS (R,R)-TMCDA monosolvated monomer.

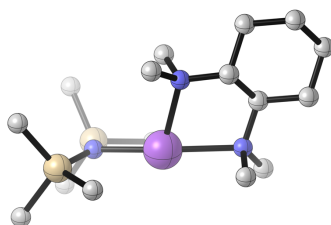

G = -1537.683691 Hartrees

G<sub>SP</sub> = -1538.843276 Hartrees

| Atom | X          | Y          | Z          | Atom | X          | Y          | Z          |
|------|------------|------------|------------|------|------------|------------|------------|
| C    | -2.9416610 | 0.5781630  | 0.3213690  | H    | -1.9697670 | -1.1372520 | 2.1790610  |
| Na   | 0.2119820  | 0.1406970  | 0.7537170  | H    | -1.2579060 | 0.1004840  | 3.2361710  |
| N    | 2.2671080  | 0.0610370  | -0.0337670 | C    | -1.9989470 | 2.2109360  | 1.8706810  |
| Si   | 3.0395280  | -1.3381660 | 0.5053470  | H    | -2.9161580 | 2.4751000  | 2.4314240  |
| C    | 4.6840790  | -1.0722040 | 1.4115730  | H    | -1.1411390 | 2.3880050  | 2.5368710  |
| H    | 4.5644530  | -0.3516400 | 2.2355720  | H    | -1.9036880 | 2.8910500  | 1.0125060  |
| H    | 5.0750270  | -2.0134540 | 1.8295670  | N    | -1.3005020 | -1.0116530 | -0.7029580 |
| H    | 5.4451170  | -0.6674840 | 0.7261620  | C    | -2.7103060 | -0.7803550 | -0.3745810 |
| C    | 1.8821300  | -2.1979610 | 1.7682320  | H    | -2.9861120 | -1.5678220 | 0.3490570  |
| H    | 2.2985860  | -3.1423000 | 2.1514670  | C    | -3.6674530 | -0.9205740 | -1.5694900 |
| H    | 1.7152400  | -1.5403790 | 2.6399480  | H    | -3.4877880 | -1.8845350 | -2.0698530 |
| H    | 0.9004200  | -2.4418350 | 1.3237440  | H    | -3.4432230 | -0.1317320 | -2.3068260 |
| C    | 3.3859440  | -2.6176840 | -0.8546260 | C    | -0.9695940 | -2.4205410 | -0.8501530 |
| H    | 2.4667110  | -2.8878760 | -1.3982480 | H    | -1.2653470 | -2.9767540 | 0.0516600  |
| H    | 4.0869960  | -2.1972470 | -1.5930120 | H    | -1.4581610 | -2.8901380 | -1.7271790 |
| H    | 3.8302550  | -3.5422870 | -0.4533280 | H    | 0.1183030  | -2.5231230 | -0.9757510 |
| Si   | 2.6997280  | 1.5473530  | -0.7048380 | C    | -0.8108090 | -0.2558120 | -1.8532980 |
| C    | 4.2732510  | 2.3374900  | -0.0015820 | H    | -1.0976010 | 0.8031790  | -1.7683300 |
| H    | 4.4331260  | 3.3514260  | -0.4013720 | H    | 0.2896500  | -0.3076080 | -1.8710760 |
| H    | 4.2205190  | 2.4031070  | 1.0963010  | H    | -1.2006010 | -0.6412290 | -2.8146220 |

|   |            |            |            |   |            |            |            |
|---|------------|------------|------------|---|------------|------------|------------|
| H | 5.1584300  | 1.7331470  | -0.2544300 | H | -2.7509960 | 1.3696640  | -0.4261430 |
| C | 1.2815850  | 2.7864940  | -0.3463660 | C | -4.4155440 | 0.6934520  | 0.7464890  |
| H | 1.1537400  | 2.9209590  | 0.7423470  | H | -4.5866740 | 1.6625200  | 1.2385470  |
| H | 1.4695180  | 3.7822530  | -0.7768640 | H | -4.6395610 | -0.0889190 | 1.4917550  |
| H | 0.3222920  | 2.4336300  | -0.7674400 | C | -5.3666010 | 0.5320600  | -0.4381450 |
| C | 2.9042050  | 1.5278340  | -2.5924810 | C | -5.1286250 | -0.7992080 | -1.1448060 |
| H | 3.7034200  | 0.8262890  | -2.8793980 | H | -5.3826350 | -1.6265860 | -0.4602140 |
| H | 1.9794860  | 1.1934120  | -3.0891180 | H | -5.7884560 | -0.8986850 | -2.0189770 |
| H | 3.1642450  | 2.5209850  | -2.9917940 | H | -5.2017880 | 1.3567530  | -1.1524720 |
| N | -1.9831900 | 0.8301570  | 1.4098440  | H | -6.4093960 | 0.6131840  | -0.0982200 |
| C | -2.0766200 | -0.0993140 | 2.5271460  |   |            |            |            |
| H | -3.0240240 | -0.0159780 | 3.0928990  |   |            |            |            |

**Table S109.** Geometric coordinates and single point energies for LiHMDS (R,R)-TMCDA monosolvated monomer.

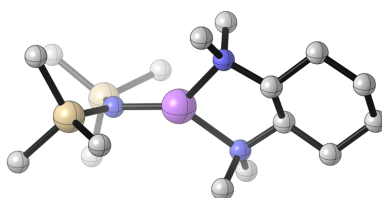

G = -1383.003398 Hartrees

G<sub>SP</sub> = -1384.11993 Hartrees

| Atom | X          | Y          | Z          | Atom | X          | Y          | Z          |
|------|------------|------------|------------|------|------------|------------|------------|
| Si   | 2.6676500  | -1.3661320 | 0.6801560  | H    | -3.9457900 | 1.9922760  | 1.5024400  |
| N    | 1.9104010  | -0.0014610 | 0.0002620  | H    | -3.9362620 | 0.2877470  | 1.9845480  |
| Si   | 2.6722040  | 1.3619940  | -0.6769560 | C    | -5.2172690 | 0.7052520  | 0.2991880  |
| C    | 3.3074670  | 2.5942540  | 0.6201400  | C    | -5.2180020 | -0.7095710 | -0.2761180 |
| H    | 3.7667360  | 3.4827290  | 0.1585500  | H    | -5.2638090 | -1.4381190 | 0.5513330  |
| H    | 2.4882720  | 2.9335420  | 1.2742700  | H    | -6.1136700 | -0.8760990 | -0.8920140 |
| H    | 4.0625820  | 2.1156080  | 1.2631190  | H    | -5.2730960 | 1.4337240  | -0.5277140 |
| C    | 1.4220560  | 2.3121250  | -1.7555030 | H    | -6.1074570 | 0.8691850  | 0.9236680  |
| H    | 0.4963390  | 2.5313300  | -1.1959330 | C    | -1.1993230 | 0.3737480  | 2.2022040  |
| H    | 1.8295170  | 3.2748250  | -2.1013470 | H    | -1.8822550 | 0.7202480  | 3.0002540  |
| H    | 1.1500460  | 1.7242820  | -2.6468660 | H    | -1.3188870 | -0.7139120 | 2.0866310  |
| C    | 4.1466800  | 0.9547960  | -1.7988850 | H    | -0.1648750 | 0.5600020  | 2.5279400  |
| H    | 4.9460330  | 0.4543670  | -1.2287350 | C    | -1.2075980 | 2.4908500  | 1.0771310  |
| H    | 3.8409590  | 0.2742590  | -2.6090140 | H    | -1.8663520 | 2.9450240  | 1.8420230  |
| H    | 4.5775420  | 1.8605010  | -2.2540080 | H    | -0.1633090 | 2.6732950  | 1.3694270  |
| Li   | 0.0623010  | 0.0020350  | -0.0098540 | H    | -1.3866920 | 2.9959860  | 0.1178460  |
| N    | -1.4212470 | 1.0571910  | 0.9304010  | C    | 4.1358860  | -0.9600950 | 1.8106990  |
| C    | -2.6898340 | 0.7240010  | 0.2670350  | H    | 3.8256540  | -0.2799450 | 2.6194540  |
| C    | -2.6902710 | -0.7211090 | -0.2683670 | H    | 4.5640260  | -1.8660970 | 2.2677810  |
| N    | -1.4271470 | -1.0505700 | -0.9441040 | H    | 4.9385500  | -0.4594540 | 1.2453980  |

|   |            |            |            |   |            |            |            |
|---|------------|------------|------------|---|------------|------------|------------|
| C | -1.2126760 | -2.4835600 | -1.0966390 | C | 1.4115800  | -2.3177690 | 1.7502680  |
| H | -1.3852400 | -2.9917590 | -0.1378090 | H | 1.8162940  | -3.2820550 | 2.0949150  |
| H | -1.8756750 | -2.9362110 | -1.8587410 | H | 1.1360450  | -1.7324200 | 2.6421460  |
| H | -0.1700110 | -2.6640350 | -1.3958800 | H | 0.4882980  | -2.5338030 | 1.1854620  |
| C | -1.2176010 | -0.3630900 | -2.2156900 | C | 3.3099110  | -2.5970630 | -0.6147270 |
| H | -1.3343530 | 0.7243490  | -2.0951950 | H | 2.4939480  | -2.9361330 | -1.2729770 |
| H | -0.1871240 | -0.5499800 | -2.5533540 | H | 4.0681540  | -2.1179320 | -1.2536340 |
| H | -1.9091000 | -0.7058310 | -3.0079680 | H | 3.7670210  | -3.4857060 | -0.1513030 |
| H | -2.7419210 | -1.3957310 | 0.6047090  | H | -3.9544970 | -0.2888280 | -1.9738590 |
| C | -3.9567580 | -0.9638960 | -1.1013250 | H | -2.7521610 | 1.3984210  | -0.6054890 |
| H | -3.9545970 | -1.9932580 | -1.4912380 | C | -3.9488790 | 0.9630110  | 1.1122600  |

**Table S110.** Geometric coordinates and single point energies for NaHMDS bipy disolvated dimer.

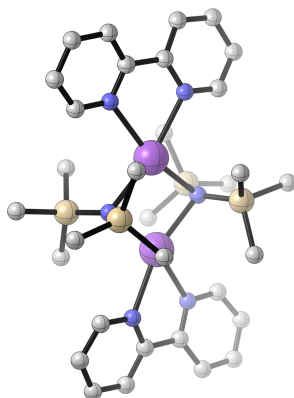

G = -3058.995001 Hartrees

G<sub>SP</sub> = -3061.263951 Hartrees

| Atom | X          | Y          | Z          | Atom | X          | Y          | Z          |
|------|------------|------------|------------|------|------------|------------|------------|
| Na   | -1.5692120 | -0.0002550 | 0.0004140  | H    | -1.0292540 | -2.0215070 | -3.7715650 |
| N    | -0.0001240 | -1.8222230 | -0.0004040 | C    | -0.2448520 | -4.3464440 | -1.7184640 |
| Na   | 1.5688640  | -0.0002920 | -0.0015480 | H    | -0.1873290 | -4.6503240 | -2.7760210 |
| N    | -0.0002450 | 1.8215170  | -0.0004420 | H    | 0.5088650  | -4.9248360 | -1.1619530 |
| Si   | 0.0907390  | 2.4775550  | 1.5681380  | H    | -1.2347060 | -4.6471140 | -1.3402840 |
| C    | -0.2410260 | 4.3453790  | 1.7185450  | C    | 1.7860310  | -2.2683930 | -2.4203810 |
| H    | -0.1815950 | 4.6490660  | 2.7760520  | H    | 2.5035280  | -3.0285860 | -2.0743500 |
| H    | 0.5122230  | 4.9232920  | 1.1609040  | H    | 1.6703310  | -2.3980950 | -3.5085000 |
| H    | -1.2312810 | 4.6468130  | 1.3420250  | H    | 2.2540400  | -1.2827350 | -2.2609180 |
| C    | -1.1292810 | 1.6196480  | 2.7507810  | Si   | -0.0892820 | -2.4795970 | 1.5677590  |
| H    | -2.1789600 | 1.7467730  | 2.4465290  | C    | 1.1304350  | -1.6212890 | 2.7503460  |
| H    | -0.9336980 | 0.5367340  | 2.8113120  | H    | 2.1799960  | -1.7458300 | 2.4445910  |
| H    | -1.0255870 | 2.0199660  | 3.7717120  | H    | 1.0287640  | -2.0235530 | 3.7707160  |
| C    | 1.7884280  | 2.2652260  | 2.4184080  | H    | 0.9327740  | -0.5388780 | 2.8128430  |
| H    | 2.2557790  | 1.2794200  | 2.2579780  | C    | -1.7867270 | -2.2697750 | 2.4190840  |
| H    | 2.5061970  | 3.0252830  | 2.0726470  | H    | -1.6711260 | -2.3999290 | 3.5071620  |
| H    | 1.6733000  | 2.3941320  | 3.5066840  | H    | -2.2548090 | -1.2840960 | 2.2599630  |



|    |            |            |            |    |            |            |            |
|----|------------|------------|------------|----|------------|------------|------------|
| Si | -0.0901570 | 2.4785680  | -1.5686570 | H  | -2.5040960 | -3.0299010 | 2.0726460  |
| C  | 1.1295230  | 1.6204830  | -2.7515260 | C  | 0.2445550  | -4.3472100 | 1.7165330  |
| H  | 2.1791920  | 1.7451570  | -2.4462130 | H  | -0.5086600 | -4.9254850 | 1.1592290  |
| H  | 0.9319850  | 0.5380290  | -2.8138980 | H  | 1.2347410  | -4.6474860 | 1.3389080  |
| H  | 1.0274090  | 2.0225990  | -3.7719110 | H  | 0.1863830  | -4.6516290 | 2.7739000  |
| C  | -1.7877270 | 2.2677240  | -2.4194880 | C  | -4.8146310 | -0.7456470 | -0.0352380 |
| H  | -2.5051700 | 3.0280560  | -2.0736530 | C  | -5.9864310 | -1.4915090 | 0.1420610  |
| H  | -1.6723200 | 2.3968710  | -3.5077060 | C  | -5.9198560 | -2.8787950 | 0.0566690  |
| H  | -2.2556180 | 1.2821270  | -2.2593590 | C  | -4.6915210 | -3.4807160 | -0.1973050 |
| C  | 0.2426990  | 4.3463200  | -1.7177670 | C  | -3.5755500 | -2.6574040 | -0.3438780 |
| H  | 0.1837180  | 4.6507050  | -2.7750980 | H  | -2.5814510 | -3.0792140 | -0.5202050 |
| H  | -0.5105080 | 4.9241810  | -1.1600060 | N  | -3.6365780 | -1.3315710 | -0.2668830 |
| H  | 1.2329220  | 4.6471700  | -1.3407100 | H  | -4.5879380 | -4.5630300 | -0.2701310 |
| C  | 4.8142200  | 0.7471490  | -0.0358740 | H  | -6.8185150 | -3.4814960 | 0.1960900  |
| C  | 5.9853950  | 1.4936750  | 0.1427420  | H  | -6.9313100 | -0.9987600 | 0.3670200  |
| C  | 5.9180950  | 2.8809300  | 0.0574160  | C  | -4.8140140 | 0.7478140  | 0.0370490  |
| C  | 4.6896640  | 3.4821360  | -0.1977850 | C  | -5.9853530 | 1.4946240  | -0.1393340 |
| C  | 3.5743230  | 2.6581810  | -0.3455410 | C  | -5.9175870 | 2.8818520  | -0.0539690 |
| H  | 2.5801560  | 3.0794750  | -0.5227030 | C  | -4.6885740 | 3.4827760  | 0.1990980  |
| N  | 3.6360440  | 1.3323750  | -0.2686290 | C  | -3.5731550 | 2.6585660  | 0.3448100  |
| H  | 4.5855130  | 4.5643970  | -0.2706160 | H  | -2.5785590 | 3.0795390  | 0.5203590  |
| H  | 6.8162440  | 3.4841560  | 0.1978430  | N  | -3.6353310 | 1.3327810  | 0.2678470  |
| H  | 6.9303110  | 1.0014260  | 0.3686570  | H  | -4.5840710 | 4.5650060  | 0.2718730  |
| C  | 4.8144190  | -0.7463070 | 0.0361970  | H  | -6.8158670 | 3.4852810  | -0.1926830 |
| C  | 5.9862810  | -1.4924260 | -0.1396120 | H  | -6.9308050 | 1.0026460  | -0.3635760 |
| C  | 5.9192310  | -2.8797100 | -0.0545680 | H  | 6.8179240  | -3.4826190 | -0.1928650 |
| C  | 4.6903950  | -3.4813640 | 0.1976380  | H  | 6.9315830  | -0.9998510 | -0.3631860 |
| C  | 3.5744410  | -2.6577980 | 0.3428850  | Si | 0.0887520  | -2.4788670 | -1.5688810 |
| H  | 2.5799960  | -3.0793330 | 0.5179040  | C  | -1.1313030 | -1.6201710 | -2.7508680 |
| N  | 3.6359220  | -1.3319650 | 0.2661890  | H  | -2.1808510 | -1.7455160 | -2.4454080 |
| H  | 4.5864490  | -4.5636650 | 0.2701500  | H  | -0.9342280 | -0.5375990 | -2.8124680 |

**Table S111.** Geometric coordinates and single point energies for NaHMDS bipy monosolvated open dimer.

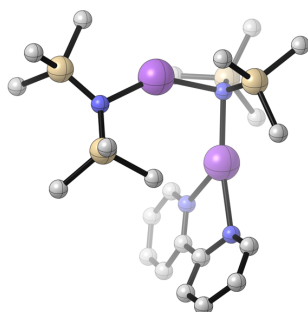

G = -2564.291623 Hartrees

G<sub>SP</sub> = -2566.02517 Hartrees

| Atom | X          | Y          | Z          | Atom | X          | Y         | Z          |
|------|------------|------------|------------|------|------------|-----------|------------|
| Na   | 1.4412770  | 1.0025880  | 0.3084450  | C    | 0.8419280  | 2.1875220 | 2.8702300  |
| N    | -0.4789970 | 2.2986740  | 0.2169780  | H    | 0.9316820  | 1.0871040 | 2.8823560  |
| Na   | -2.0659500 | 0.6676880  | -0.1847540 | H    | 1.7778090  | 2.6190160 | 2.4714940  |
| N    | -2.4559820 | -1.5032270 | -0.0400030 | H    | 0.7621000  | 2.5060860 | 3.9209330  |
| Si   | -1.4117090 | -2.5002500 | 0.8303860  | C    | -2.1637370 | 1.8545210 | 2.6124780  |
| C    | 0.2434660  | -1.5649370 | 1.0623330  | H    | -3.1020140 | 2.1615570 | 2.1197160  |
| H    | 0.0421780  | -0.6229720 | 1.6046500  | H    | -2.0770060 | 0.7576550 | 2.5202850  |
| H    | 0.9985120  | -2.1294500 | 1.6337930  | H    | -2.2740850 | 2.0801810 | 3.6842490  |
| H    | 0.6575330  | -1.3421090 | 0.0632710  | Si   | -0.2904010 | 3.2091280 | -1.2126700 |
| C    | -0.9681030 | -4.1434650 | -0.0122150 | C    | -1.1864610 | 4.8720310 | -1.2802360 |
| H    | -1.8624370 | -4.7822520 | -0.0948470 | H    | -1.1174080 | 5.3076170 | -2.2895140 |
| H    | -0.5930740 | -3.9683240 | -1.0327990 | H    | -2.2536400 | 4.7512160 | -1.0362020 |
| H    | -0.2057810 | -4.7075770 | 0.5488080  | H    | -0.7586980 | 5.5951330 | -0.5702790 |
| C    | -1.9981780 | -2.9387930 | 2.5817560  | C    | 1.5429280  | 3.5910570 | -1.5685030 |
| H    | -1.2602580 | -3.5461010 | 3.1301380  | H    | 1.6756260  | 4.1296940 | -2.5199580 |
| H    | -2.1949420 | -2.0250560 | 3.1646160  | H    | 1.9380320  | 4.2359080 | -0.7658170 |
| H    | -2.9405170 | -3.5070630 | 2.5380020  | H    | 2.1849190  | 2.6947230 | -1.6129880 |
| Si   | -3.9479660 | -1.8253770 | -0.7733240 | C    | -0.9650730 | 2.1837100 | -2.6692540 |

|    |            |            |            |   |            |            |            |
|----|------------|------------|------------|---|------------|------------|------------|
| C  | -3.8345990 | -2.8419080 | -2.3721620 | H | -2.0687380 | 2.1977160  | -2.6706390 |
| H  | -3.1697990 | -2.3460030 | -3.0967840 | H | -0.6468290 | 2.5813740  | -3.6458780 |
| H  | -3.4137660 | -3.8386540 | -2.1659610 | H | -0.6508890 | 1.1268640  | -2.6190420 |
| H  | -4.8193720 | -2.9806720 | -2.8460220 | C | 3.4413980  | -1.0021080 | -1.1579690 |
| C  | -5.2071430 | -2.7090870 | 0.3371860  | C | 4.1728060  | -1.7225870 | -2.1093840 |
| H  | -5.3449120 | -2.1619480 | 1.2827680  | C | 3.9407000  | -1.4875200 | -3.4609920 |
| H  | -6.1894020 | -2.8141470 | -0.1499690 | C | 2.9908340  | -0.5397720 | -3.8265470 |
| H  | -4.8482990 | -3.7206140 | 0.5885200  | C | 2.3207070  | 0.1424050  | -2.8123560 |
| C  | -4.7287680 | -0.1536310 | -1.2734650 | H | 1.5744720  | 0.9041020  | -3.0559460 |
| H  | -4.0994850 | 0.3738030  | -2.0130070 | N | 2.5399230  | -0.0799380 | -1.5177450 |
| H  | -5.7185750 | -0.2775950 | -1.7386860 | H | 2.7711810  | -0.3222030 | -4.8711700 |
| H  | -4.8670820 | 0.5007510  | -0.3945090 | H | 4.5020290  | -2.0361060 | -4.2185550 |
| Si | -0.6759050 | 2.7517360  | 1.8516120  | H | 4.9299940  | -2.4407650 | -1.7980720 |
| C  | -0.8792170 | 4.6001820  | 2.1860750  | C | 3.6447710  | -1.2308300 | 0.3067410  |
| H  | -1.7715770 | 5.0001610  | 1.6814060  | C | 4.1419150  | -2.4496280 | 0.7819930  |
| H  | -0.9850560 | 4.7909040  | 3.2653740  | C | 4.3202620  | -2.6188340 | 2.1515030  |
| H  | -0.0065700 | 5.1678990  | 1.8259660  | C | 4.0063570  | -1.5676230 | 3.0062420  |
| H  | 4.1307210  | -1.6509110 | 4.0853940  | C | 3.5012680  | -0.3954670 | 2.4455550  |
| H  | 4.6925970  | -3.5658920 | 2.5443620  | H | 3.2214290  | 0.4473420  | 3.0837570  |
| H  | 4.3543050  | -3.2673960 | 0.0948170  | N | 3.3181810  | -0.2327630 | 1.1369510  |

**Table S112.** Geometric coordinates and single point energies for NaHMDS bipy disolvated monomer.

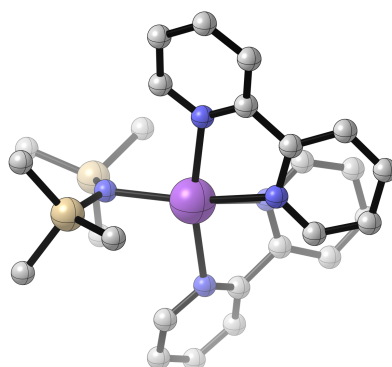

G = -2024.16868 Hartrees

G<sub>SP</sub> = -2025.844374 Hartrees

| Atom | X          | Y          | Z          | Atom | X          | Y          | Z          |
|------|------------|------------|------------|------|------------|------------|------------|
| Na   | 0.0644860  | 0.1567170  | -0.2862580 | C    | -0.0499610 | 4.5419710  | 0.9558760  |
| N    | -1.5316400 | -1.2785170 | 0.9713630  | C    | 0.2313990  | 3.1837690  | 0.7860420  |
| C    | -1.6108710 | -2.5320700 | 0.5175970  | H    | 1.2065250  | 2.7414900  | 1.0237320  |
| C    | -2.7516780 | -3.3202780 | 0.7125330  | H    | 0.7103950  | 5.2120980  | 1.3565070  |
| C    | -3.8325530 | -2.7742140 | 1.3984730  | H    | -1.5619440 | 6.0649870  | 0.6960800  |
| C    | -3.7396880 | -1.4696530 | 1.8774360  | H    | -3.2240770 | 4.4590900  | -0.2570730 |
| C    | -2.5603610 | -0.7644210 | 1.6381020  | N    | 2.2554880  | 0.5339610  | 0.1679640  |
| H    | -2.4377280 | 0.2637690  | 1.9940090  | Si   | 2.8063770  | -0.1733810 | 1.5980590  |
| H    | -4.5592790 | -1.0029430 | 2.4234880  | C    | 1.5049690  | 0.0359040  | 2.9712200  |
| H    | -4.7391940 | -3.3611180 | 1.5541350  | H    | 0.5455910  | -0.4089140 | 2.6560880  |
| H    | -2.7956480 | -4.3326330 | 0.3101260  | H    | 1.8077600  | -0.4498990 | 3.9124190  |
| C    | -0.4179220 | -3.0438680 | -0.2222930 | H    | 1.3273150  | 1.1031600  | 3.1815200  |
| C    | -0.0147800 | -4.3793590 | -0.1268660 | C    | 3.0871570  | -2.0544530 | 1.4602720  |
| C    | 1.1332170  | -4.7787380 | -0.8072140 | H    | 3.4937420  | -2.4852380 | 2.3895870  |
| C    | 1.8362680  | -3.8389330 | -1.5533490 | H    | 2.1358760  | -2.5688610 | 1.2385890  |
| C    | 1.3571290  | -2.5288350 | -1.5875390 | H    | 3.7888450  | -2.2820560 | 0.6409180  |
| H    | 1.8915920  | -1.7503360 | -2.1388810 | C    | 4.4291620  | 0.5579290  | 2.2680380  |
| N    | 0.2556520  | -2.1470700 | -0.9481760 | H    | 5.2465770  | 0.4220980  | 1.5412070  |

|   |            |            |            |    |            |            |            |
|---|------------|------------|------------|----|------------|------------|------------|
| H | 2.7503930  | -4.1005510 | -2.0856800 | H  | 4.3186790  | 1.6403330  | 2.4416040  |
| H | 1.4836920  | -5.8094820 | -0.7371760 | H  | 4.7388180  | 0.0892790  | 3.2157520  |
| H | -0.5682110 | -5.0801920 | 0.4986090  | Si | 3.0288540  | 1.1351620  | -1.2011940 |
| N | -0.6662000 | 2.3332770  | 0.2957820  | C  | 3.8093880  | 2.8560860  | -0.9781680 |
| C | -1.8736730 | 2.7725700  | -0.0645490 | H  | 3.0448740  | 3.5956760  | -0.6894030 |
| C | -2.7947570 | 1.7381350  | -0.6284960 | H  | 4.5658770  | 2.8289710  | -0.1776700 |
| C | -4.1856230 | 1.8375570  | -0.4953700 | H  | 4.2980280  | 3.2161050  | -1.8977590 |
| C | -4.9824560 | 0.8153930  | -1.0020110 | C  | 4.4257920  | 0.0421310  | -1.9006380 |
| C | -4.3730100 | -0.2681240 | -1.6299830 | H  | 4.0784750  | -0.9819200 | -2.1131990 |
| C | -2.9810930 | -0.2759330 | -1.7200580 | H  | 4.8544690  | 0.4562430  | -2.8272990 |
| N | -2.2161210 | 0.6955010  | -1.2320950 | H  | 5.2396420  | -0.0416290 | -1.1620590 |
| H | -2.4544370 | -1.1097690 | -2.1952450 | C  | 1.7397320  | 1.3408390  | -2.5969380 |
| H | -4.9565440 | -1.0929480 | -2.0384850 | H  | 2.1787320  | 1.7555460  | -3.5177410 |
| H | -6.0678710 | 0.8613670  | -0.8995610 | H  | 1.2607740  | 0.3827780  | -2.8663970 |
| H | -4.6304840 | 2.6867630  | 0.0235530  | H  | 0.9397340  | 2.0292540  | -2.2728850 |
| C | -2.2424410 | 4.1145600  | 0.0688020  | C  | -1.3089810 | 5.0088020  | 0.5903240  |

**Table S113.** Geometric coordinates and single point energies for NaHMDS DME disolvated dimer.

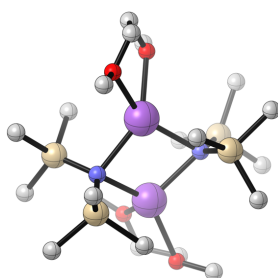

G = -2686.355084 Hartrees

G<sub>SP</sub> = -2688.26002 Hartrees

| Atom | X          | Y          | Z          | Atom | X          | Y          | Z          |
|------|------------|------------|------------|------|------------|------------|------------|
| Na   | -0.7605140 | 1.1748110  | -0.0715200 | H    | 2.5402270  | -2.6736220 | 2.5183330  |
| N    | -1.6319750 | -1.0221470 | 0.2204460  | H    | 3.9933070  | -3.4214590 | 1.7798350  |
| Na   | 0.7323680  | -1.3435810 | 0.0480250  | C    | 3.1894350  | -3.0359980 | -0.6636700 |
| N    | 1.5677660  | 0.8488440  | 0.3950940  | C    | 2.2950250  | -3.4214990 | -1.8166830 |
| Si   | 1.5930320  | 1.4843380  | 1.9883070  | H    | 1.8876440  | -4.4382730 | -1.6698630 |
| C    | 2.3135570  | 3.2337890  | 2.1634420  | H    | 2.8989510  | -3.4201200 | -2.7424880 |
| H    | 2.2049840  | 3.5788640  | 3.2042280  | O    | 1.2447340  | -2.4912380 | -1.9147890 |
| H    | 3.3859850  | 3.2654620  | 1.9138660  | C    | 0.6429170  | -2.4605790 | -3.1869700 |
| H    | 1.7963720  | 3.9519750  | 1.5087340  | H    | 0.2738650  | -3.4593870 | -3.4751650 |
| C    | -0.1955910 | 1.6501220  | 2.6290070  | H    | -0.2098090 | -1.7733810 | -3.1402150 |
| H    | -0.6910880 | 2.5025210  | 2.1308430  | H    | 1.3608920  | -2.1025240 | -3.9453400 |
| H    | -0.8019420 | 0.7474720  | 2.4466740  | H    | 3.6695570  | -2.0600780 | -0.8686260 |
| H    | -0.2198290 | 1.8557410  | 3.7100600  | H    | 3.9875030  | -3.7934960 | -0.5530540 |
| C    | 2.5599020  | 0.4617300  | 3.2622630  | Si   | -2.6204480 | -1.1360000 | -1.1672210 |
| H    | 2.1591290  | -0.5529950 | 3.3975220  | C    | -2.5862770 | -2.8408330 | -2.0174710 |
| H    | 3.6137520  | 0.3728910  | 2.9520970  | H    | -1.6078360 | -3.3277490 | -1.8867520 |
| H    | 2.5418990  | 0.9617820  | 4.2436600  | H    | -3.3408710 | -3.5035600 | -1.5670580 |
| Si   | 2.7249450  | 1.3302100  | -0.7698440 | H    | -2.8047710 | -2.7737400 | -3.0955710 |
| C    | 2.4263280  | 0.4403440  | -2.4310820 | C    | -2.0545960 | 0.1731810  | -2.4401860 |

|   |            |            |            |    |            |            |            |
|---|------------|------------|------------|----|------------|------------|------------|
| H | 2.8293130  | -0.5835200 | -2.4123960 | H  | -2.4028110 | 1.1666590  | -2.1122570 |
| H | 1.3539270  | 0.3530200  | -2.6735210 | H  | -0.9581690 | 0.2232010  | -2.5630170 |
| H | 2.9192350  | 0.9778430  | -3.2566550 | H  | -2.4886310 | -0.0153500 | -3.4344530 |
| C | 2.7335210  | 3.2012160  | -1.1450150 | C  | -4.4557000 | -0.7437220 | -0.8809930 |
| H | 3.4004810  | 3.7310320  | -0.4485200 | H  | -5.0446170 | -0.8724630 | -1.8032480 |
| H | 3.0913260  | 3.4086200  | -2.1665890 | H  | -4.8885350 | -1.4053420 | -0.1133490 |
| H | 1.7282530  | 3.6343150  | -1.0297180 | H  | -4.5783430 | 0.2969020  | -0.5422620 |
| C | 4.5237240  | 0.9313440  | -0.2959070 | Si | -1.9342490 | -1.9491010 | 1.6282910  |
| H | 5.2296050  | 1.2568840  | -1.0767980 | C  | -0.2854120 | -2.3009050 | 2.5135720  |
| H | 4.7970940  | 1.4504440  | 0.6372180  | H  | 0.3188100  | -3.0231250 | 1.9382990  |
| H | 4.6785840  | -0.1466470 | -0.1292130 | H  | -0.4505960 | -2.7380800 | 3.5100570  |
| O | 2.4222940  | -2.9522990 | 0.5096500  | H  | 0.3029080  | -1.3786730 | 2.6557430  |
| C | 3.2047700  | -2.6610360 | 1.6467080  | C  | -3.0729960 | -1.1530260 | 2.9253870  |
| H | 3.6663520  | -1.6628830 | 1.5594440  | H  | -3.1980780 | -1.8366900 | 3.7800920  |
| O | -2.6995920 | 2.3901940  | 0.2817040  | H  | -2.6788850 | -0.2017560 | 3.3143650  |
| C | -3.4821940 | 2.1009650  | 1.4172140  | H  | -4.0738890 | -0.9641650 | 2.5044730  |
| H | -3.4879500 | 1.0106110  | 1.5280480  | C  | -2.7024210 | -3.6564640 | 1.3079910  |
| H | -3.0506120 | 2.5562640  | 2.3255000  | H  | -3.7160100 | -3.5734490 | 0.8839010  |
| H | -4.5141270 | 2.4680260  | 1.2812720  | H  | -2.0918400 | -4.2418460 | 0.6031030  |
| H | -1.7279060 | 4.9671200  | -1.5663170 | H  | -2.7815470 | -4.2263500 | 2.2474440  |
| H | -2.7049870 | 3.5591820  | -2.0894630 | O  | -0.7883630 | 3.1227340  | -1.4682620 |
| C | -0.2517090 | 3.1330710  | -2.7706710 | C  | -1.9500690 | 3.9045570  | -1.3572380 |
| H | 0.6246530  | 2.4748480  | -2.7792080 | C  | -2.5040670 | 3.7586310  | 0.0397410  |
| H | -0.9939780 | 2.7642330  | -3.4999900 | H  | -3.4580970 | 4.3117550  | 0.1117250  |
| H | 0.0654510  | 4.1510610  | -3.0555530 | H  | -1.8026080 | 4.1848720  | 0.7832440  |

**Table S114.** Geometric coordinates and single point energies for NaHMDS DME monosolvated monomer.

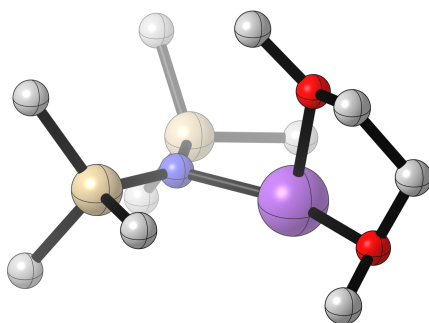

G = -1343.157151 Hartrees

G<sub>SP</sub> = -1344.114079 Hartrees

| Atom | X          | Y          | Z          | Atom | X          | Y          | Z          |
|------|------------|------------|------------|------|------------|------------|------------|
| Na   | -0.8972420 | -0.7077310 | -0.8289060 | H    | 4.3648070  | -1.7858270 | -1.4994780 |
| N    | 1.0868680  | 0.0435050  | -0.2460310 | H    | 3.3207820  | -0.7160320 | -2.4761940 |
| Si   | 1.0693660  | 1.6983560  | 0.0802280  | C    | 1.3705640  | -2.7907950 | -0.8195710 |
| C    | 1.5825830  | 2.1807720  | 1.8454320  | H    | 0.5469810  | -3.0469850 | -0.1286130 |
| H    | 0.9887170  | 1.6475370  | 2.6038930  | H    | 0.9553490  | -2.6809670 | -1.8375430 |
| H    | 2.6393630  | 1.9203180  | 2.0156230  | H    | 2.0469750  | -3.6588830 | -0.8446530 |
| H    | 1.4722080  | 3.2625450  | 2.0223140  | C    | -3.3087250 | -0.5284320 | 1.1821930  |
| C    | 2.1263180  | 2.7656120  | -1.0774420 | C    | -3.8713040 | -0.9885030 | -0.1487990 |
| H    | 1.8652870  | 2.5714540  | -2.1294100 | H    | -4.9498180 | -0.7678830 | -0.2155870 |
| H    | 1.9988390  | 3.8421800  | -0.8816360 | H    | -3.7372800 | -2.0768330 | -0.2368790 |
| H    | 3.1938790  | 2.5244410  | -0.9539480 | O    | -3.1757270 | -0.4011930 | -1.2318010 |
| C    | -0.7322860 | 2.3102900  | -0.1496020 | C    | -3.7069490 | 0.8350890  | -1.6614340 |
| H    | -0.8677050 | 3.3648790  | 0.1358880  | H    | -3.0925030 | 1.1879560  | -2.4980830 |
| H    | -1.0286110 | 2.2196700  | -1.2096190 | H    | -4.7454920 | 0.7072130  | -2.0085870 |
| H    | -1.4325800 | 1.7076600  | 0.4567340  | H    | -3.6770410 | 1.5929450  | -0.8616640 |
| Si   | 2.2465700  | -1.1844500 | -0.2622860 | H    | -3.4438110 | 0.5629420  | 1.3163700  |
| C    | 3.0118080  | -1.5684000 | 1.4331360  | H    | -3.8395690 | -1.0378920 | 2.0079030  |
| H    | 3.7213120  | -2.4096710 | 1.3849460  | O    | -1.9444800 | -0.8485970 | 1.1785030  |



|   |           |            |            |   |            |            |           |
|---|-----------|------------|------------|---|------------|------------|-----------|
| H | 3.5549460 | -0.6911760 | 1.8187360  | C | -1.2378100 | -0.4676490 | 2.3412620 |
| H | 2.2322790 | -1.8238820 | 2.1687560  | H | -1.5572810 | -1.0730090 | 3.2059810 |
| C | 3.6920740 | -0.9146080 | -1.4587900 | H | -0.1714530 | -0.6176530 | 2.1295450 |
| H | 4.2888610 | -0.0418950 | -1.1496990 | H | -1.4049400 | 0.6007390  | 2.5619680 |

**Table S115.** Geometric coordinates and single point energies for NaHMDS DME disolvated monomer.

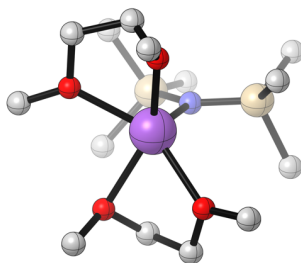

G = -1651.524745 Hartrees

G<sub>SP</sub> = -1652.836119 Hartrees

| Atom | X          | Y          | Z          | Atom | X          | Y          | Z          |
|------|------------|------------|------------|------|------------|------------|------------|
| Na   | 0.9540170  | -0.1797570 | -0.2030820 | H    | 0.2984960  | -3.4634990 | 1.7463840  |
| N    | -1.2844070 | 0.1294900  | -0.0112860 | O    | 1.3093150  | -2.4855800 | 0.2187450  |
| Si   | -1.8667250 | 1.3877680  | 0.9593030  | C    | 1.4495280  | -3.6366920 | -0.5759360 |
| C    | -1.5237960 | 3.1097020  | 0.2163590  | H    | 0.5270910  | -4.2417450 | -0.5581580 |
| H    | -0.4375080 | 3.2798060  | 0.1569800  | H    | 1.6404440  | -3.3151960 | -1.6066830 |
| H    | -1.9385060 | 3.1860530  | -0.8020480 | H    | 2.2945280  | -4.2551190 | -0.2256330 |
| H    | -1.9586580 | 3.9182820  | 0.8250700  | H    | 0.8156760  | -1.6332920 | 3.3964900  |
| C    | -3.7321590 | 1.3615760  | 1.3235350  | H    | -0.1290430 | -1.0821070 | 1.9679180  |
| H    | -4.0445370 | 0.3826710  | 1.7222820  | C    | 3.1004850  | -0.7159890 | 2.4036190  |
| H    | -3.9960720 | 2.1303450  | 2.0675390  | H    | 3.6850340  | 0.1989620  | 2.2429420  |
| H    | -4.3210450 | 1.5557310  | 0.4140130  | H    | 3.1296300  | -0.9721210 | 3.4772340  |
| C    | -1.0208550 | 1.4240330  | 2.6673710  | H    | 3.5671910  | -1.5339240 | 1.8284140  |
| H    | -1.2515640 | 2.3535020  | 3.2123460  | O    | 1.5780620  | 0.4958210  | -2.3461680 |
| H    | -1.3622840 | 0.5804110  | 3.2899230  | C    | 0.9935660  | 1.7804970  | -2.2567770 |
| H    | 0.0740390  | 1.3428130  | 2.5692130  | C    | 1.7491820  | 2.6657270  | -1.2823990 |
| Si   | -2.0923440 | -1.0630320 | -0.8978510 | H    | 1.2094940  | 3.6241820  | -1.1756160 |
| C    | -3.8176700 | -0.6130620 | -1.5533870 | H    | 2.7748330  | 2.8943980  | -1.6326110 |
| H    | -4.1829560 | -1.3800360 | -2.2550760 | O    | 1.8001980  | 1.9793740  | -0.0564310 |
| H    | -4.5488920 | -0.5290550 | -0.7353580 | C    | 2.2527910  | 2.7466180  | 1.0279100  |

|   |            |            |            |   |            |            |            |
|---|------------|------------|------------|---|------------|------------|------------|
| H | -3.7959940 | 0.3524380  | -2.0838320 | H | 2.2337710  | 2.0982550  | 1.9126630  |
| C | -2.3126460 | -2.6883770 | 0.0746510  | H | 3.2802570  | 3.1139090  | 0.8545590  |
| H | -2.8648280 | -2.5091700 | 1.0112930  | H | 1.5881080  | 3.6097670  | 1.2054130  |
| H | -2.8489730 | -3.4614010 | -0.4986020 | H | -0.0284960 | 1.6219200  | -1.8737820 |
| H | -1.3217100 | -3.0904750 | 0.3416670  | H | 0.9413340  | 2.2546080  | -3.2524630 |
| C | -1.0776190 | -1.5532390 | -2.4355520 | C | 2.7103860  | 0.4131180  | -3.1693610 |
| H | -0.9667750 | -0.6986610 | -3.1217760 | H | 3.0293100  | -0.6362820 | -3.1912200 |
| H | -0.0614290 | -1.8787060 | -2.1591080 | H | 2.4717520  | 0.7311370  | -4.1987120 |
| H | -1.5537240 | -2.3788720 | -2.9883160 | H | 3.5465950  | 1.0282890  | -2.7940410 |
| O | 1.7869050  | -0.4589700 | 1.9823030  | C | 1.1444730  | -2.7704070 | 1.5881210  |
| C | 0.8471530  | -1.4660230 | 2.3048280  | H | 2.0562860  | -3.2632730 | 1.9777730  |

**Table S116.** Geometric coordinates and single point energies for sodium cation with 3 DME molecules.

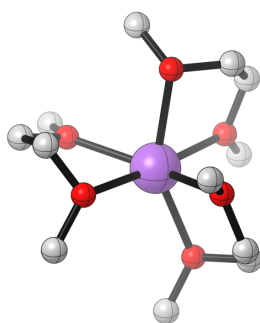

G -1087.214075 Hartrees

G<sub>SP</sub> = -1088.328026 Hartrees

| Atom | X          | Y          | Z          | Atom | X          | Y          | Z          |
|------|------------|------------|------------|------|------------|------------|------------|
| Na   | -0.0145960 | -0.0325590 | -0.1256840 | H    | -0.3176540 | 3.2286020  | 2.2310550  |
| O    | 1.8612670  | -0.6650050 | -1.3451520 | H    | 1.2519770  | 3.7629090  | 0.3608800  |
| C    | 2.9522310  | -0.2822390 | -0.5258510 | H    | -0.4300700 | 3.7195380  | -0.2218410 |
| C    | 2.8248810  | -0.8763770 | 0.8617590  | H    | 1.4540910  | 1.6388190  | -2.5466560 |
| H    | 2.7783970  | -1.9818110 | 0.8135010  | H    | 0.4312450  | 3.1183060  | -2.4831270 |
| H    | 3.7049090  | -0.6037100 | 1.4719850  | O    | -0.8522770 | -2.0731230 | 0.6480290  |
| O    | 1.6433740  | -0.3669680 | 1.4313160  | C    | -2.2051680 | -1.7399790 | 0.8660620  |
| C    | 1.3197280  | -0.9199570 | 2.6876770  | C    | -2.9012930 | -1.3167580 | -0.4155010 |
| H    | 2.1265460  | -0.7378610 | 3.4166570  | H    | -3.9163380 | -0.9505810 | -0.1735460 |
| H    | 0.4003240  | -0.4293380 | 3.0320010  | H    | -3.0161420 | -2.1626910 | -1.1182610 |
| H    | 1.1377700  | -2.0041630 | 2.6051320  | O    | -2.1316270 | -0.2972460 | -1.0105990 |
| H    | 3.9084570  | -0.5756540 | -0.9887710 | C    | -2.7390730 | 0.2872170  | -2.1399640 |
| H    | 2.9202320  | 0.8140730  | -0.4455720 | H    | -2.0512300 | 1.0454810  | -2.5337640 |
| C    | 2.0908980  | -1.8265390 | -2.1132100 | H    | -2.9323220 | -0.4659990 | -2.9215260 |
| H    | 1.1593780  | -2.0676340 | -2.6396890 | H    | -3.6930220 | 0.7697030  | -1.8680130 |
| H    | 2.8865050  | -1.6538960 | -2.8557670 | H    | -2.1974010 | -0.8986700 | 1.5753130  |
| H    | 2.3770400  | -2.6844940 | -1.4819120 | H    | -2.7484090 | -2.5805110 | 1.3313810  |
| H    | 2.0960130  | 3.1495100  | -1.8221890 | C    | -0.6367510 | -3.3501710 | 0.0920950  |

|   |            |           |            |   |            |            |            |
|---|------------|-----------|------------|---|------------|------------|------------|
| C | 1.1963340  | 2.5252360 | -1.9542150 | H | 0.4466570  | -3.5210470 | 0.0728610  |
| O | 0.7148930  | 2.0681630 | -0.7105720 | H | -1.1076120 | -4.1314160 | 0.7110710  |
| C | 0.3854510  | 3.0980970 | 0.1926550  | H | -1.0265500 | -3.4257580 | -0.9369290 |
| C | -0.0059600 | 2.4531710 | 1.5101150  | H | -3.0232590 | 1.1971770  | 1.1238100  |
| O | -1.0217920 | 1.4825930 | 1.3505540  | H | -2.5712740 | 2.7668850  | 1.8532060  |
| C | -2.2991380 | 2.0201720 | 1.0891030  | H | 0.8619800  | 1.9164620  | 1.9167390  |
| H | -2.3532180 | 2.4873670 | 0.0915400  |   |            |            |            |

**Table S117** Geometric coordinates and single point energies for NaHMDS NIP disolvated dimer.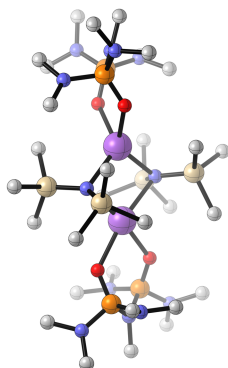

G = -4999.021698 Hartrees

G<sub>SP</sub> = -5002.574597 Hartrees

| Atom | X          | Y          | Z          | Atom | X          | Y          | Z          |
|------|------------|------------|------------|------|------------|------------|------------|
| Na   | -1.5880630 | -0.0268000 | 0.2337810  | H    | 1.1265980  | -4.9592130 | -0.1443490 |
| N    | -0.0970000 | -1.7896990 | -0.3336780 | H    | 2.4462270  | -3.7546660 | -0.1079700 |
| Na   | 1.4831100  | -0.0052670 | 0.0843710  | H    | 2.0202690  | -4.6834670 | 1.3676200  |
| N    | -0.1006490 | 1.7086550  | 0.8316110  | Si   | -0.2924760 | -2.2444210 | -1.9598850 |
| Si   | -0.1446230 | 2.0518440  | 2.4972510  | C    | -0.5556820 | -4.1153830 | -2.2596610 |
| C    | -0.8036060 | 3.7816480  | 2.9679240  | H    | -1.0750880 | -4.2982410 | -3.2146650 |
| H    | -0.7873200 | 3.9151100  | 4.0619410  | H    | 0.4149170  | -4.6332320 | -2.3094020 |
| H    | -0.1914890 | 4.5834110  | 2.5261170  | H    | -1.1394450 | -4.5901260 | -1.4547480 |
| H    | -1.8411120 | 3.9323320  | 2.6308190  | C    | 1.2021870  | -1.7976860 | -3.0490800 |
| C    | -1.3013980 | 0.8520350  | 3.4137490  | H    | 2.1075760  | -2.2301700 | -2.5969110 |
| H    | -2.3440100 | 1.0493740  | 3.1152470  | H    | 1.0948060  | -2.1688370 | -4.0811170 |
| H    | -1.1075950 | -0.2076350 | 3.1850240  | H    | 1.3374970  | -0.7045520 | -3.0880300 |
| H    | -1.2302360 | 0.9828920  | 4.5054690  | C    | -1.7701090 | -1.3532730 | -2.7723260 |
| C    | 1.5756760  | 1.9870250  | 3.3098270  | H    | -2.6798750 | -1.4169070 | -2.1556810 |
| H    | 2.1114120  | 1.0617220  | 3.0475440  | H    | -1.5621290 | -0.2785160 | -2.8998690 |
| H    | 2.1679240  | 2.8307000  | 2.9190020  | H    | -1.9782570 | -1.7745580 | -3.7701540 |
| H    | 1.5297690  | 2.0749070  | 4.4071620  | O    | -3.3011320 | -0.9695460 | 1.3504400  |
| Si   | 0.1536560  | 2.8542120  | -0.3953560 | P    | -4.6246990 | -1.2700360 | 0.7309630  |

|   |            |            |            |   |            |            |            |
|---|------------|------------|------------|---|------------|------------|------------|
| C | 0.6889560  | 1.9448630  | -1.9845610 | N | -5.5864960 | -2.0654510 | 1.8386860  |
| H | 1.7064770  | 1.5288020  | -1.8768820 | C | -6.7237690 | -2.8756110 | 1.4675600  |
| H | 0.0003600  | 1.1111400  | -2.1992190 | H | -6.6585700 | -3.8677220 | 1.9445010  |
| H | 0.6921530  | 2.6071880  | -2.8651630 | H | -7.6798460 | -2.4141480 | 1.7771470  |
| C | -1.4227330 | 3.8189850  | -0.8419420 | H | -6.7506430 | -3.0251240 | 0.3802460  |
| H | -1.7303060 | 4.4304780  | 0.0232180  | C | -5.3911480 | -1.8630560 | 3.2624160  |
| H | -1.2945210 | 4.4896230  | -1.7069880 | H | -6.2333990 | -1.3075230 | 3.7151920  |
| H | -2.2235950 | 3.0950930  | -1.0638690 | H | -5.3112440 | -2.8363710 | 3.7730020  |
| C | 1.4924160  | 4.1703690  | -0.0675340 | H | -4.4586370 | -1.3103950 | 3.4282610  |
| H | 1.6659110  | 4.7941690  | -0.9606020 | N | -4.5724030 | -2.2010790 | -0.6416750 |
| H | 1.2039700  | 4.8420230  | 0.7560630  | C | -3.7011590 | -3.3675270 | -0.6267980 |
| H | 2.4304960  | 3.6672500  | 0.2130360  | H | -3.2863230 | -3.5192370 | -1.6340970 |
| O | 3.2627450  | 1.3709160  | 0.3836260  | H | -2.8568910 | -3.1922840 | 0.0538410  |
| P | 4.5638510  | 1.5181870  | -0.3351420 | H | -4.2400510 | -4.2841110 | -0.3236530 |
| N | 5.4132760  | 2.8174850  | 0.2665180  | C | -5.4534040 | -2.0956920 | -1.7840880 |
| C | 6.4580900  | 3.5352370  | -0.4333420 | H | -6.1174810 | -2.9759090 | -1.8674220 |
| H | 6.1653830  | 4.5871400  | -0.5968290 | H | -6.0743040 | -1.1928860 | -1.7151520 |
| H | 7.3952430  | 3.5350470  | 0.1508420  | H | -4.8559230 | -2.0315270 | -2.7094180 |
| H | 6.6522680  | 3.0742700  | -1.4093460 | N | -5.4800520 | 0.1337100  | 0.2608310  |
| C | 5.0885850  | 3.3359050  | 1.5866640  | P | -4.7170720 | 1.2602060  | -0.7740640 |
| H | 5.9563530  | 3.2585670  | 2.2639060  | O | -3.3189640 | 0.8059570  | -1.0315750 |
| H | 4.7944670  | 4.3963940  | 1.5171240  | N | -5.5690250 | 1.4065260  | -2.1969790 |
| H | 4.2447070  | 2.7757600  | 2.0069060  | C | -4.9984310 | 0.9285610  | -3.4459740 |
| N | 4.6019540  | 1.7667870  | -1.9835820 | H | -4.9246540 | 1.7532640  | -4.1745680 |
| C | 4.0857960  | 3.0235250  | -2.5135940 | H | -3.9950510 | 0.5228120  | -3.2651470 |
| H | 3.0974990  | 2.8848210  | -2.9787780 | H | -5.6303250 | 0.1374340  | -3.8850980 |
| H | 3.9734230  | 3.7608790  | -1.7080080 | C | -6.9375250 | 1.8722210  | -2.2760190 |
| H | 4.7799210  | 3.4265320  | -3.2697950 | H | -7.2496610 | 2.3258020  | -1.3267350 |
| C | 4.5636550  | 0.6581670  | -2.9273620 | H | -7.0341010 | 2.6383330  | -3.0642280 |
| H | 4.9803140  | 1.0005470  | -3.8867120 | H | -7.6337850 | 1.0493370  | -2.5197960 |
| H | 5.1792450  | -0.1751840 | -2.5663130 | N | -4.9794630 | 2.6979410  | 0.0251490  |

|   |           |            |            |    |            |            |            |
|---|-----------|------------|------------|----|------------|------------|------------|
| H | 3.5400790 | 0.2829610  | -3.0983990 | C  | -5.0178480 | 3.9762280  | -0.6726990 |
| N | 5.4850910 | 0.1029810  | -0.1209640 | H  | -5.2488760 | 3.8286870  | -1.7341720 |
| P | 4.7095800 | -1.4046910 | 0.0445750  | H  | -5.7953430 | 4.6178540  | -0.2273040 |
| O | 3.3232920 | -1.3263450 | -0.5073260 | H  | -4.0487670 | 4.4944340  | -0.6042730 |
| N | 5.5952220 | -2.5557970 | -0.7758690 | C  | -4.4319600 | 2.7859810  | 1.3772480  |
| C | 5.1517730 | -3.0216650 | -2.0796310 | H  | -5.0096100 | 3.5176280  | 1.9620050  |
| H | 5.0090550 | -4.1150420 | -2.0653510 | H  | -4.4899200 | 1.8086180  | 1.8746030  |
| H | 4.1944490 | -2.5536550 | -2.3352730 | H  | -3.3729470 | 3.0945900  | 1.3555610  |
| H | 5.8950550 | -2.7809130 | -2.8594230 | C  | -6.8547680 | 0.3598420  | 0.7012520  |
| C | 6.8300820 | -3.1496140 | -0.3082110 | H  | -7.5973940 | -0.0552270 | -0.0024360 |
| H | 7.0535540 | -2.8196710 | 0.7131960  | H  | -7.0165770 | -0.0990210 | 1.6845330  |
| H | 6.7444010 | -4.2499220 | -0.3023720 | H  | -7.0291880 | 1.4396010  | 0.8022430  |
| H | 7.6790060 | -2.8804270 | -0.9611910 | H  | 5.2258600  | 0.1945080  | 2.3099160  |
| N | 4.9780460 | -1.7893600 | 1.6438880  | H  | 3.9786660  | -0.7268310 | 3.1887660  |
| C | 4.6873370 | -3.1411970 | 2.1037380  | C  | 6.9396010  | 0.1315450  | -0.2037840 |
| H | 4.6242420 | -3.8320450 | 1.2533710  | H  | 7.3081520  | -0.1853370 | -1.1942540 |
| H | 5.4863900 | -3.4843600 | 2.7816550  | H  | 7.3029610  | 1.1457490  | 0.0017750  |
| H | 3.7260910 | -3.1789030 | 2.6409530  | H  | 7.3741930  | -0.5303300 | 0.5598880  |
| C | 4.9680420 | -0.7940910 | 2.7062300  | Si | 0.4027350  | -2.7948840 | 0.9455230  |
| H | 5.7113530 | -1.0737600 | 3.4698650  | C  | -1.0144890 | -3.6362620 | 1.8943340  |
| H | 1.4990320 | -2.3481360 | 3.1790380  | H  | -0.6555890 | -4.0900000 | 2.8320810  |
| H | 2.3410260 | -1.4901120 | 1.8655490  | H  | -1.8019670 | -2.9028710 | 2.1335930  |
| H | 0.8122040 | -0.8491190 | 2.5285210  | H  | -1.4653100 | -4.4407090 | 1.2902430  |
| C | 1.6131400 | -4.1874580 | 0.4706340  | C  | 1.3475040  | -1.7706860 | 2.2526310  |



**Table S118.** Geometric coordinates and single point energies for NaHMDS NIPA monosolvated monomer.

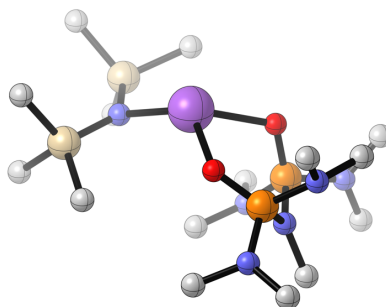

G = -2499.495146 Hartrees

G<sub>SP</sub> = -2501.276167 Hartrees

| Atom | X          | Y          | Z          | Atom | X          | Y          | Z          |
|------|------------|------------|------------|------|------------|------------|------------|
| Na   | 0.8220350  | 0.3383910  | 1.3594530  | H    | 1.5326640  | -2.7694120 | -1.0765020 |
| P    | -2.2578910 | 1.2638880  | 0.2754780  | C    | 0.3862960  | -0.5635760 | -2.0698680 |
| N    | -3.4365670 | 1.0322700  | 1.4359270  | H    | 0.5861490  | -0.8131970 | -3.1233630 |
| C    | -3.5548670 | 2.0927130  | 2.4278080  | H    | -0.2701370 | 0.3153030  | -2.0364490 |
| H    | -2.9289580 | 1.8949720  | 3.3147100  | H    | 1.3345760  | -0.3117840 | -1.5598780 |
| H    | -3.2396640 | 3.0509300  | 1.9934910  | C    | -3.1301430 | -0.3375430 | -1.7993590 |
| H    | -4.6035030 | 2.1858020  | 2.7501660  | H    | -4.0316480 | -0.9252680 | -1.5577180 |
| C    | -3.8153130 | -0.2835370 | 1.9215320  | H    | -3.4388060 | 0.6445310  | -2.1760320 |
| H    | -4.8198180 | -0.2198880 | 2.3669280  | H    | -2.5828550 | -0.8454330 | -2.6070680 |
| H    | -3.8565460 | -1.0005020 | 1.0917980  | N    | 2.8076200  | 0.3432200  | 0.3382990  |
| H    | -3.1128980 | -0.6689780 | 2.6801390  | Si   | 3.7165840  | -1.0553750 | 0.6357920  |
| N    | -2.8726480 | 2.4816690  | -0.6732250 | C    | 5.3060720  | -0.7856740 | 1.6426550  |
| C    | -4.2809640 | 2.7511420  | -0.8785510 | H    | 6.0060180  | -0.1365830 | 1.0914970  |
| H    | -4.5192550 | 3.7880390  | -0.5869600 | H    | 5.0803950  | -0.2906830 | 2.6003800  |
| H    | -4.5608500 | 2.6305120  | -1.9404150 | H    | 5.8260900  | -1.7328850 | 1.8582830  |
| H    | -4.8902660 | 2.0702460  | -0.2726230 | C    | 2.6672420  | -2.2779970 | 1.6568390  |
| C    | -1.9624060 | 3.2994860  | -1.4609420 | H    | 2.5143510  | -1.8794470 | 2.6749470  |
| H    | -2.1013150 | 3.1191710  | -2.5414860 | H    | 1.6681880  | -2.4470010 | 1.2216510  |

|   |            |            |            |    |           |            |            |
|---|------------|------------|------------|----|-----------|------------|------------|
| H | -2.1492090 | 4.3674510  | -1.2647450 | H  | 3.1602370 | -3.2569850 | 1.7652570  |
| H | -0.9233170 | 3.0774050  | -1.1889970 | C  | 4.2942070 | -1.9662060 | -0.9376330 |
| O | -0.8851150 | 1.6185000  | 0.7523100  | H  | 4.6872760 | -2.9710910 | -0.7134120 |
| N | -2.2557130 | -0.1724540 | -0.6410190 | H  | 3.4896200 | -2.0675620 | -1.6826890 |
| P | -1.3109780 | -1.5077730 | -0.1588070 | H  | 5.1010430 | -1.3914250 | -1.4190090 |
| O | -0.7870010 | -1.2450670 | 1.2220120  | Si | 3.3593190 | 1.8106710  | -0.3142630 |
| N | -2.2383610 | -2.8913160 | -0.1710190 | C  | 4.5836570 | 1.6129530  | -1.7563310 |
| C | -2.6301940 | -3.5282660 | 1.0754810  | H  | 4.8500280 | 2.5845140  | -2.2022320 |
| H | -2.2593800 | -4.5665910 | 1.1029820  | H  | 5.5160800 | 1.1352530  | -1.4136770 |
| H | -2.1959270 | -2.9825680 | 1.9203410  | H  | 4.1571600 | 0.9763810  | -2.5482240 |
| H | -3.7284230 | -3.5543380 | 1.1806920  | C  | 4.2197520 | 2.9323800  | 0.9560270  |
| C | -2.6630340 | -3.5846020 | -1.3715200 | H  | 5.0939630 | 2.4223830  | 1.3903940  |
| H | -2.2331920 | -3.1103120 | -2.2615100 | H  | 4.5625260 | 3.8801360  | 0.5107910  |
| H | -2.3224340 | -4.6340510 | -1.3463710 | H  | 3.5336080 | 3.1736030  | 1.7837810  |
| H | -3.7625300 | -3.5878190 | -1.4647940 | C  | 1.8953420 | 2.8250950  | -0.9875030 |
| N | -0.2698300 | -1.7090740 | -1.4332240 | H  | 1.4176110 | 2.3022880  | -1.8326220 |
| C | 0.5267900  | -2.9311180 | -1.4943390 | H  | 1.1324400 | 2.9675090  | -0.2046380 |
| H | 0.0418070  | -3.7365570 | -0.9280690 | H  | 2.2171030 | 3.8174470  | -1.3413970 |
| H | 0.6308060  | -3.2508740 | -2.5433140 |    |           |            |            |

**Table S119.** Geometric coordinates and single point energies for NaHMDS NIPA disolvated monomer.

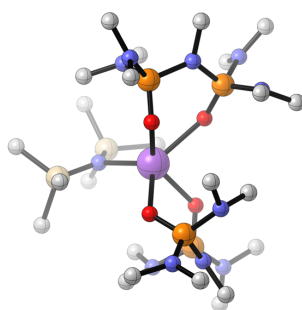

G = -3964.183624 Hartrees

G<sub>SP</sub> = -3967.14406 Hartrees

| Atom | X          | Y         | Z          | Atom | X          | Y          | Z          |
|------|------------|-----------|------------|------|------------|------------|------------|
| Na   | 0.1640580  | 0.5050770 | 0.0024380  | H    | 3.2056550  | -1.5286090 | -4.6613800 |
| N    | 0.4379380  | 2.8637880 | 0.0463760  | H    | 3.1643780  | -0.3050050 | -3.3665610 |
| Si   | 0.9814740  | 3.6547150 | -1.3530110 | H    | 4.6610120  | -1.2512760 | -3.6638880 |
| C    | 2.7925710  | 4.2632710 | -1.2926710 | C    | 3.4214600  | -3.6593780 | -3.0323260 |
| H    | 2.9576430  | 4.8956150 | -0.4055820 | H    | 2.9413200  | -4.3473850 | -2.3262670 |
| H    | 3.5134380  | 3.4337780 | -1.2461720 | H    | 3.0686610  | -3.9068690 | -4.0484700 |
| H    | 3.0313490  | 4.8639580 | -2.1856290 | H    | 4.5135100  | -3.8229910 | -3.0063490 |
| C    | 0.8585080  | 2.5171720 | -2.8660640 | N    | 1.2022170  | -3.0783280 | -1.0590220 |
| H    | 1.4403980  | 1.5973460 | -2.6973630 | C    | 0.1655310  | -3.2242530 | -2.0773410 |
| H    | -0.1831710 | 2.1995240 | -3.0335350 | H    | 0.5772690  | -2.9866290 | -3.0676990 |
| H    | 1.2226350  | 3.0117060 | -3.7808920 | H    | -0.1888260 | -4.2675100 | -2.0922150 |
| C    | 0.0239340  | 5.2516380 | -1.7874880 | H    | -0.6792630 | -2.5401110 | -1.8815520 |
| H    | 0.3534850  | 5.6623430 | -2.7558210 | C    | 0.7178290  | -3.3489420 | 0.2891190  |
| H    | -1.0643600 | 5.0899460 | -1.8408020 | H    | 0.3496670  | -4.3878730 | 0.3226810  |
| H    | 0.2039990  | 6.0240360 | -1.0213160 | H    | 1.5324060  | -3.2478460 | 1.0152980  |
| Si   | 0.1510770  | 3.5713210 | 1.5586810  | H    | -0.0914910 | -2.6575730 | 0.5882610  |
| C    | -1.3780460 | 4.7170560 | 1.6373590  | C    | 4.3821620  | -2.8726200 | 0.0310420  |
| H    | -1.5402380 | 5.0932450 | 2.6609240  | H    | 5.1787250  | -2.6675420 | -0.7039390 |
| H    | -1.2202430 | 5.5879940 | 0.9813390  | H    | 4.8270110  | -2.8965430 | 1.0336010  |

|   |            |            |            |   |            |            |            |
|---|------------|------------|------------|---|------------|------------|------------|
| H | -2.3040580 | 4.2253790  | 1.3067830  | H | 3.9700380  | -3.8732630 | -0.1731560 |
| C | 1.5261530  | 4.7163690  | 2.2285510  | O | -1.5020760 | -0.2672780 | -1.4863890 |
| H | 1.2739230  | 5.0779040  | 3.2389470  | P | -2.9307060 | 0.1126890  | -1.2697500 |
| H | 2.5073060  | 4.2201730  | 2.2832780  | N | -3.7796820 | 0.0113860  | -2.7021390 |
| H | 1.6366340  | 5.6001030  | 1.5786150  | C | -4.9925720 | 0.7438140  | -3.0024380 |
| C | -0.0857480 | 2.2095460  | 2.8638980  | H | -4.8305180 | 1.4307150  | -3.8511380 |
| H | -0.7906150 | 1.4409750  | 2.5061460  | H | -5.8135300 | 0.0576330  | -3.2775290 |
| H | 0.8665250  | 1.6810000  | 3.0297150  | H | -5.3002120 | 1.3374220  | -2.1336850 |
| H | -0.4448490 | 2.6012520  | 3.8292420  | C | -3.2626780 | -0.7955390 | -3.7923050 |
| P | 3.1208090  | -0.6632100 | 1.1868840  | H | -3.9503250 | -1.6235460 | -4.0390170 |
| N | 3.9243100  | -1.1668200 | 2.5593430  | H | -3.1346710 | -0.1764210 | -4.6958310 |
| C | 5.3382100  | -0.9809000 | 2.8050160  | H | -2.2821500 | -1.2006250 | -3.5173510 |
| H | 5.4954110  | -0.4063810 | 3.7339070  | N | -3.3261050 | 1.6146860  | -0.6838550 |
| H | 5.8590860  | -1.9493490 | 2.9177590  | C | -2.7794200 | 2.7623480  | -1.4119710 |
| H | 5.7924400  | -0.4250830 | 1.9764660  | H | -1.8110470 | 3.0669540  | -0.9793990 |
| C | 3.1963580  | -1.8696990 | 3.5989760  | H | -2.6278560 | 2.4984500  | -2.4683520 |
| H | 3.5280130  | -2.9204070 | 3.6861650  | H | -3.4930860 | 3.6000540  | -1.3604140 |
| H | 3.3596000  | -1.3792140 | 4.5728590  | C | -3.5338740 | 1.8686130  | 0.7336700  |
| H | 2.1231180  | -1.8394890 | 3.3765860  | H | -4.0933350 | 2.8104950  | 0.8376070  |
| N | 3.9967370  | 0.6428260  | 0.6513140  | H | -4.1320630 | 1.0685820  | 1.1879240  |
| C | 3.6916580  | 1.8928110  | 1.3526480  | H | -2.5848280 | 1.9690260  | 1.2858970  |
| H | 2.8052960  | 2.3851740  | 0.9157700  | N | -3.6632790 | -0.9547650 | -0.1463810 |
| H | 3.4912990  | 1.6863620  | 2.4142740  | P | -2.8025020 | -1.4280630 | 1.2401540  |
| H | 4.5600240  | 2.5664830  | 1.2885680  | O | -1.5149000 | -0.6842570 | 1.3393750  |
| C | 4.3904220  | 0.8288940  | -0.7364690 | N | -3.7221260 | -1.1743340 | 2.6129040  |
| H | 5.2421920  | 1.5258540  | -0.7657150 | C | -3.3783350 | -0.1166930 | 3.5507250  |
| H | 4.7141440  | -0.1248270 | -1.1741260 | H | -3.2255400 | -0.5423370 | 4.5567900  |
| H | 3.5694190  | 1.2376120  | -1.3466850 | H | -2.4497240 | 0.3749940  | 3.2402910  |
| O | 1.6655170  | -0.4818740 | 1.4729400  | H | -4.1827980 | 0.6357710  | 3.6160450  |
| N | 3.3287640  | -1.8685500 | -0.0086530 | C | -4.8782160 | -1.9605130 | 2.9885870  |
| P | 2.2647990  | -1.8161840 | -1.3316140 | H | -5.0152580 | -2.8024330 | 2.2994370  |

|   |            |            |            |   |            |            |            |
|---|------------|------------|------------|---|------------|------------|------------|
| O | 1.7126150  | -0.4378410 | -1.4783090 | H | -4.7472590 | -2.3699770 | 4.0056390  |
| N | 3.0782510  | -2.2914150 | -2.7066500 | H | -5.7989750 | -1.3515400 | 2.9883690  |
| C | 3.5577050  | -1.2900640 | -3.6440810 | N | -2.8141780 | -3.0954340 | 1.1077090  |
| H | -3.0889120 | -3.1380820 | -0.9740160 | C | -2.4079940 | -3.8984980 | 2.2467920  |
| H | -1.9055020 | -4.3169070 | -0.3572520 | H | -2.3512550 | -3.2781030 | 3.1502100  |
| C | -5.0935300 | -1.2290940 | -0.2050730 | H | -3.1344140 | -4.7097250 | 2.4248900  |
| H | -5.6781340 | -0.5564540 | 0.4463950  | H | -1.4170400 | -4.3536170 | 2.0798370  |
| H | -5.4468410 | -1.1157740 | -1.2371890 | C | -2.8668970 | -3.8210150 | -0.1456730 |
| H | -5.2921610 | -2.2678210 | 0.0991670  | H | -3.6491700 | -4.5988010 | -0.1031780 |

**Table S120.** Geometric coordinates and single point energies for sodium cation solvated by 2 NIPA molecules.

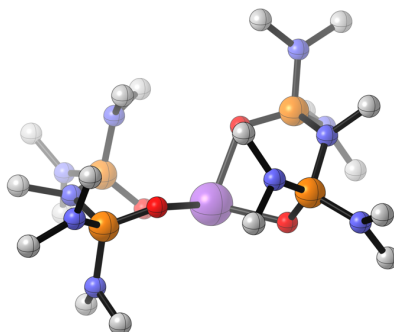

G = -3091.536447 Hartrees

G<sub>SP</sub> = -3093.945049 Hartrees

| Atom | X          | Y          | Z          | Atom | X          | Y          | Z          |
|------|------------|------------|------------|------|------------|------------|------------|
| Na   | -0.0001000 | 0.0005780  | -1.1242790 | H    | -5.3702960 | 2.3331110  | -2.3548760 |
| P    | 2.7519390  | -1.4780410 | -0.3829990 | H    | -4.1967560 | 3.6420030  | -2.6640630 |
| N    | 3.8780800  | -2.5912640 | -0.8699670 | H    | -3.6894730 | 1.9453600  | -2.8558100 |
| C    | 4.5300490  | -3.5559490 | -0.0019080 | N    | -2.0099340 | 2.1935220  | 0.9203920  |
| H    | 4.3303220  | -4.5821230 | -0.3525700 | C    | -1.2540260 | 3.4169570  | 0.6621380  |
| H    | 5.6235660  | -3.4089760 | 0.0012710  | H    | -0.1830670 | 3.1889550  | 0.5343710  |
| H    | 4.1553750  | -3.4600050 | 1.0239000  | H    | -1.6238470 | 3.9043880  | -0.2499700 |
| C    | 4.3098590  | -2.6235300 | -2.2601460 | H    | -1.3829720 | 4.1157520  | 1.5035520  |
| H    | 5.3695590  | -2.3328540 | -2.3551110 | C    | -1.5293200 | 1.4432450  | 2.0724200  |
| H    | 4.1962300  | -3.6419190 | -2.6643510 | H    | -1.4889950 | 2.1218760  | 2.9382850  |
| H    | 3.6886380  | -1.9453430 | -2.8559360 | H    | -2.2166750 | 0.6240130  | 2.3145580  |
| N    | 2.0095850  | -2.1934180 | 0.9204630  | H    | -0.5235180 | 1.0294730  | 1.8892620  |
| C    | 1.2535170  | -3.4167650 | 0.6622820  | O    | -1.9059770 | 1.0376330  | -1.5442960 |
| H    | 0.1825750  | -3.1886220 | 0.5346500  | N    | -3.5300530 | 0.1082180  | 0.2630890  |
| H    | 1.6231410  | -3.9042030 | -0.2499000 | P    | -2.7663520 | -1.4062160 | 0.1655330  |
| H    | 1.3825040  | -4.1155960 | 1.5036610  | O    | -1.2718310 | -1.2455430 | 0.2304750  |
| C    | 1.5291090  | -1.4430880 | 2.0725150  | N    | -3.2930150 | -2.3540920 | 1.4235700  |
| H    | 1.4888470  | -2.1216740 | 2.9384180  | C    | -2.5384770 | -2.3995870 | 2.6657880  |

|   |           |            |            |   |            |            |            |
|---|-----------|------------|------------|---|------------|------------|------------|
| H | 2.2164950 | -0.6238510 | 2.3145460  | H | -2.3917380 | -3.4463130 | 2.9766130  |
| H | 0.5233260 | -1.0292680 | 1.8893850  | H | -1.5535570 | -1.9412570 | 2.5192100  |
| O | 1.9055350 | -1.0372970 | -1.5441620 | H | -3.0678610 | -1.8740280 | 3.4796480  |
| N | 3.5300220 | -0.1083690 | 0.2631100  | C | -4.5749360 | -3.0356910 | 1.4634090  |
| P | 2.7666750 | 1.4062240  | 0.1655470  | H | -5.0590100 | -2.9917850 | 0.4807910  |
| O | 1.2721370 | 1.2458780  | 0.2307640  | H | -4.4280410 | -4.0946750 | 1.7308650  |
| N | 3.2937370 | 2.3540890  | 1.4234340  | H | -5.2472500 | -2.5860760 | 2.2141880  |
| C | 2.5393040 | 2.3999710  | 2.6657040  | N | -3.4193590 | -2.1240710 | -1.1838660 |
| H | 2.3929710 | 3.4467780  | 2.9764430  | C | -2.9198490 | -3.4533240 | -1.5156990 |
| H | 1.5542100 | 1.9419800  | 2.5192320  | H | -2.5826030 | -3.9673390 | -0.6055310 |
| H | 3.0685570 | 1.8742960  | 3.4795770  | H | -3.7254900 | -4.0499310 | -1.9692620 |
| C | 4.5759520 | 3.0351380  | 1.4631130  | H | -2.0753980 | -3.4070360 | -2.2242770 |
| H | 5.0598380 | 2.9911040  | 0.4804060  | C | -3.9231200 | -1.3702050 | -2.3236530 |
| H | 4.4295420 | 4.0941580  | 1.7306820  | H | -4.6486380 | -1.9964100 | -2.8632600 |
| H | 5.2482290 | 2.5851870  | 2.2137270  | H | -4.4364810 | -0.4627020 | -1.9855880 |
| N | 3.4196140 | 2.1238360  | -1.1840060 | H | -3.1201580 | -1.0754750 | -3.0192260 |
| C | 2.9205840 | 3.4532770  | -1.5157740 | C | -4.8188900 | 0.2049450  | 0.9479350  |
| H | 2.5833520 | 3.9673010  | -0.6056070 | H | -4.7197270 | 0.0543800  | 2.0347220  |
| H | 3.7264740 | 4.0496900  | -1.9691570 | H | -5.2547890 | 1.1949760  | 0.7701010  |
| H | 2.0762290 | 3.4073320  | -2.2244880 | H | -5.5257920 | -0.5398530 | 0.5529020  |
| C | 3.9231100 | 1.3698060  | -2.3237990 | H | 5.5263620  | 0.5383860  | 0.5520300  |
| H | 4.6486450 | 1.9958680  | -2.8635490 | P | -2.7523240 | 1.4780840  | -0.3830330 |
| H | 4.4363950 | 0.4622610  | -1.9857290 | N | -3.8787530 | 2.5911220  | -0.8697610 |
| H | 3.1200250 | 1.0751270  | -3.0192490 | C | -4.5308090 | 3.5555770  | -0.0015150 |
| C | 4.8188600 | -0.2054040 | 0.9479140  | H | -4.3312850 | 4.5818320  | -0.3520530 |
| H | 4.7198740 | -0.0535940 | 2.0345350  | H | -5.6243020 | 3.4084200  | 0.0017380  |
| H | 5.2539100 | -1.1959970 | 0.7711540  | H | -4.1560340 | 3.4595450  | 1.0242490  |
|   |           |            |            | C | -4.3105470 | 2.6236020  | -2.2599280 |

**Table S121.** Geometric coordinates and single point energies for sodium cation solvated by 3 NIPA molecules.

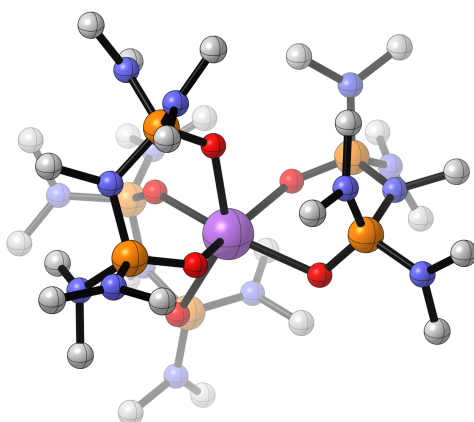

G = -4556.22629 Hartrees

G<sub>SP</sub> = -4559.81512 Hartrees

| Atom | X          | Y          | Z          | Atom | X          | Y          | Z          |
|------|------------|------------|------------|------|------------|------------|------------|
| Na   | 0.0816630  | -0.0709330 | -0.6016480 | H    | -4.6406690 | 0.7003170  | 2.7558480  |
| P    | -0.9148330 | -2.7284660 | 1.4172570  | H    | -5.5304980 | 3.2397260  | 1.0119870  |
| N    | -1.4922720 | -2.4571970 | 2.9572900  | H    | -4.4958710 | 2.6956840  | -0.3416460 |
| C    | -2.0607750 | -3.4646540 | 3.8290580  | C    | -3.4983900 | -3.3063900 | 0.8443970  |
| H    | -1.4609590 | -3.5671840 | 4.7501840  | H    | -3.4519330 | -4.4051950 | 0.9387950  |
| H    | -3.0888310 | -3.1951400 | 4.1276800  | H    | -3.7449250 | -2.8785830 | 1.8255270  |
| H    | -2.0899070 | -4.4385050 | 3.3258270  | H    | -4.3130340 | -3.0509040 | 0.1554570  |
| C    | -1.4391330 | -1.1166380 | 3.5166380  | O    | 1.9805620  | -0.1609190 | -1.9344070 |
| H    | -2.4461240 | -0.7990500 | 3.8384880  | P    | 3.1680920  | -0.8563240 | -1.3626620 |
| H    | -0.7780490 | -1.0912720 | 4.4007470  | N    | 4.2655190  | -1.2145450 | -2.5640460 |
| H    | -1.0715280 | -0.4081570 | 2.7624830  | C    | 5.2380290  | -2.2851270 | -2.4980600 |
| N    | -0.4502180 | -4.3350690 | 1.4705860  | H    | 5.1480500  | -2.9388120 | -3.3814310 |
| C    | 0.5774030  | -4.7189150 | 2.4226170  | H    | 6.2717030  | -1.8961010 | -2.4710990 |
| H    | 1.5253680  | -4.9589160 | 1.9111570  | H    | 5.0719210  | -2.8944440 | -1.6006920 |
| H    | 0.7659830  | -3.8994790 | 3.1300350  | C    | 4.3750670  | -0.3424320 | -3.7196340 |
| H    | 0.2616620  | -5.6062850 | 2.9967030  | H    | 5.3234650  | 0.2251820  | -3.7132630 |



|   |            |            |            |   |           |            |            |
|---|------------|------------|------------|---|-----------|------------|------------|
| C | -0.7203400 | -5.3284640 | 0.4508100  | H | 4.3420000 | -0.9371350 | -4.6464450 |
| H | -1.0241780 | -6.2774110 | 0.9233480  | H | 3.5301370 | 0.3561010  | -3.7316060 |
| H | -1.5274710 | -4.9964550 | -0.2128240 | N | 2.9035200 | -2.2862590 | -0.5707560 |
| H | 0.1723270  | -5.5293030 | -0.1681210 | C | 2.0941700 | -3.2872650 | -1.2473600 |
| O | 0.1319620  | -1.7224770 | 1.0679710  | H | 1.1817840 | -3.4742510 | -0.6591310 |
| N | -2.2428790 | -2.7377680 | 0.3499080  | H | 1.7670050 | -2.9146380 | -2.2269670 |
| P | -2.0931310 | -2.4068340 | -1.3208800 | H | 2.6613850 | -4.2263930 | -1.3765430 |
| O | -0.7005470 | -1.9741090 | -1.6276930 | C | 3.2134570 | -2.5986600 | 0.8079840  |
| N | -2.4725730 | -3.7647190 | -2.2194780 | H | 3.7722510 | -3.5498810 | 0.8657700  |
| C | -1.4271940 | -4.5123030 | -2.8978340 | H | 3.8244280 | -1.8110840 | 1.2644170  |
| H | -1.6097990 | -4.5251850 | -3.9854490 | H | 2.2802850 | -2.6867610 | 1.3858190  |
| H | -0.4568000 | -4.0376410 | -2.7144270 | N | 4.0031010 | 0.1141200  | -0.2168450 |
| H | -1.3947410 | -5.5581320 | -2.5464110 | P | 3.1609910 | 1.0224580  | 0.9472800  |
| C | -3.8098990 | -4.2968350 | -2.3950810 | O | 1.6998250 | 1.0362810  | 0.6397980  |
| H | -4.5582070 | -3.5877810 | -2.0215810 | N | 3.4134280 | 0.4429090  | 2.4894620  |
| H | -4.0093550 | -4.4666030 | -3.4664860 | C | 2.3655770 | -0.3094790 | 3.1668390  |
| H | -3.9379560 | -5.2613540 | -1.8725250 | H | 2.0376520 | 0.2230060  | 4.0764840  |
| N | -3.3854240 | -1.4018540 | -1.6082280 | H | 1.5061890 | -0.4618430 | 2.4987760  |
| C | -3.6204650 | -1.0226440 | -2.9980440 | H | 2.7463580 | -1.2992070 | 3.4725450  |
| H | -3.2954100 | -1.8243450 | -3.6734210 | C | 4.6839030 | 0.4859220  | 3.1869840  |
| H | -4.6970780 | -0.8519480 | -3.1548900 | H | 5.3747900 | 1.1832920  | 2.6975080  |
| H | -3.0576220 | -0.1065180 | -3.2405640 | H | 4.5319100 | 0.8307490  | 4.2232770  |
| C | -3.8497680 | -0.4011970 | -0.6613650 | H | 5.1595060 | -0.5102430 | 3.2308260  |
| H | -4.9530340 | -0.4009570 | -0.6450170 | N | 4.0095910 | 2.4647280  | 0.9434220  |
| H | -3.4606150 | -0.5976360 | 0.3452780  | C | 3.8635780 | 3.4044510  | 2.0435340  |
| H | -3.4813420 | 0.5920410  | -0.9622420 | H | 3.4204700 | 2.9088370  | 2.9160830  |
| H | -5.4732600 | 1.5157970  | 0.5627670  | H | 4.8474590 | 3.8091610  | 2.3317950  |
| C | -4.8686490 | 2.4324610  | 0.6544610  | H | 3.2169800 | 4.2534350  | 1.7596690  |
| N | -3.7696670 | 2.2340660  | 1.5817730  | C | 4.5043810 | 3.0739570  | -0.2806000 |
| P | -2.1491430 | 2.2207970  | 1.1782560  | H | 5.5106170 | 3.4906470  | -0.1119250 |
| N | -2.1183520 | 3.1950570  | -0.2156380 | H | 4.5608680 | 2.3316440  | -1.0856190 |

|   |            |           |            |   |            |            |            |
|---|------------|-----------|------------|---|------------|------------|------------|
| P | -1.2413110 | 2.7249400 | -1.6104660 | H | 3.8453180  | 3.8948440  | -0.6137290 |
| N | -1.8019470 | 3.6933190 | -2.8462700 | C | 5.4522660  | -0.0578130 | -0.0893210 |
| C | -1.3067380 | 5.0231200 | -3.1342670 | H | 5.7231420  | -1.0187330 | 0.3807100  |
| H | -1.0219660 | 5.1033690 | -4.1962170 | H | 5.9259760  | -0.0109850 | -1.0791830 |
| H | -2.0691790 | 5.7962760 | -2.9299140 | H | 5.8683510  | 0.7549190  | 0.5194030  |
| H | -0.4207020 | 5.2405830 | -2.5245590 | O | -1.4170080 | 1.2799400  | -1.9399160 |
| C | -2.9686940 | 3.2863780 | -3.6064840 | C | -2.6092260 | 4.5729890  | -0.1360890 |
| H | -3.8409050 | 3.9299710 | -3.3893990 | H | -1.7897690 | 5.3058190  | -0.0450980 |
| H | -2.7616140 | 3.3491790 | -4.6867730 | H | -3.1989040 | 4.8209010  | -1.0294390 |
| H | -3.2206890 | 2.2458990 | -3.3683880 | H | -3.2642180 | 4.6838460  | 0.7374710  |
| N | 0.3122090  | 3.2147140 | -1.3138120 | O | -1.4569290 | 0.9229740  | 0.9236760  |
| C | 1.3321850  | 2.8680270 | -2.2923010 | N | -1.4416210 | 2.9948380  | 2.4776150  |
| H | 2.1200790  | 2.2719550 | -1.8074160 | C | -0.1031460 | 2.6213050  | 2.9107230  |
| H | 0.9044050  | 2.2341970 | -3.0800400 | H | -0.1307870 | 2.2307690  | 3.9432870  |
| H | 1.7655560  | 3.7771590 | -2.7469820 | H | 0.3167960  | 1.8582490  | 2.2412870  |
| C | 0.7913330  | 3.9726350 | -0.1792700 | H | 0.5630690  | 3.5021150  | 2.8999670  |
| H | 1.1693070  | 4.9641810 | -0.4931290 | C | -2.0282460 | 4.1019180  | 3.2068410  |
| H | -0.0028240 | 4.1172810 | 0.5629440  | H | -3.0832530 | 4.2318040  | 2.9363410  |
| H | 1.6027750  | 3.4129950 | 0.3103350  | H | -1.9776800 | 3.9072990  | 4.2913250  |
| H | -3.3062790 | 1.5980770 | 3.5323790  | H | -1.4939970 | 5.0482030  | 3.0101580  |
| H | -4.9071590 | 2.3634630 | 3.3510810  | C | -4.1750680 | 1.6948710  | 2.8689360  |

**Table S122.** Geometric coordinates and single point energies for NaHMDS PMDTA disolvated dimer.

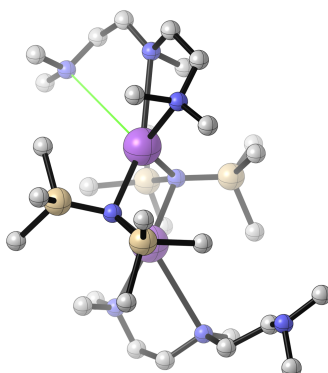

G = -3109.752278 Hartrees

G<sub>SP</sub> = -3112.122829 Hartrees

| Atom | X          | Y         | Z          | Atom | X         | Y          | Z          |
|------|------------|-----------|------------|------|-----------|------------|------------|
| Na   | 1.0860950  | 0.9365320 | -0.4400130 | H    | 5.5726660 | -2.4314220 | 3.5620320  |
| N    | -0.5952840 | 1.1383610 | 1.2736340  | C    | 6.6445960 | -2.3750130 | 1.0475360  |
| Si   | -1.1172110 | 2.7121110 | 0.8611710  | H    | 7.3976830 | -1.9523800 | 1.7499510  |
| C    | -2.6684160 | 3.3717690 | 1.7355270  | H    | 6.8096530 | -3.4597400 | 0.9847420  |
| H    | -3.5384010 | 2.7332720 | 1.5247500  | H    | 6.8326750 | -1.9532580 | 0.0507030  |
| H    | -2.9045220 | 4.3865360 | 1.3753740  | H    | 5.6626590 | -0.2032500 | 2.3024960  |
| H    | -2.5395530 | 3.4204630 | 2.8264420  | H    | 3.9647280 | -0.5919880 | 1.9486350  |
| C    | -1.5840250 | 2.7195990 | -0.9819390 | H    | 6.1433690 | 0.2336420  | -0.0257800 |
| H    | -0.8361390 | 2.2478290 | -1.6429040 | H    | 4.7211460 | -0.7032110 | -0.5552530 |
| H    | -1.7922590 | 3.7308730 | -1.3666950 | C    | 4.5910430 | 2.1584000  | 1.1840660  |
| H    | -2.5103330 | 2.1290440 | -1.0777650 | H    | 3.8985760 | 3.0102470  | 1.1664360  |
| C    | 0.2180440  | 4.0239550 | 1.2111250  | H    | 4.4673410 | 1.6767380  | 2.1597310  |
| H    | 0.2990520  | 4.1726680 | 2.3006520  | H    | 5.6320570 | 2.5418980  | 1.1073200  |
| H    | 1.2054170  | 3.6908280 | 0.8518470  | H    | 5.6159540 | 2.1206010  | -1.2617590 |
| H    | -0.0106790 | 5.0010130 | 0.7567300  | H    | 4.3839360 | 1.0709860  | -1.9652680 |
| Si   | 0.0147570  | 0.7768080 | 2.8324740  | H    | 4.1647220 | 3.5138720  | -2.4457350 |
| C    | 1.8438520  | 1.2552990 | 2.9938660  | H    | 3.8914120 | 3.8393070  | -0.7320120 |

|    |            |            |            |    |            |            |            |
|----|------------|------------|------------|----|------------|------------|------------|
| H  | 2.4003410  | 0.8443300  | 2.1357660  | C  | 1.6594010  | 4.1940780  | -1.8042110 |
| H  | 1.9724380  | 2.3488070  | 2.9764520  | H  | 0.5689370  | 4.0766730  | -1.8553110 |
| H  | 2.3055840  | 0.8675650  | 3.9165060  | H  | 1.8951350  | 4.8186860  | -0.9338050 |
| C  | -0.0724210 | -1.0929210 | 3.2069250  | H  | 2.0019960  | 4.7223130  | -2.7181400 |
| H  | -0.5411290 | -1.6301960 | 2.3702470  | H  | 2.4392460  | 2.5619360  | -3.7836450 |
| H  | 0.9293860  | -1.5247340 | 3.3583840  | H  | 2.3852360  | 1.0764280  | -2.7853140 |
| H  | -0.6640780 | -1.2970540 | 4.1140610  | H  | 0.7420770  | 0.3969540  | -4.7485910 |
| C  | -0.8740530 | 1.6397850  | 4.2733410  | H  | -0.8744130 | 0.1690220  | -5.4527450 |
| H  | -0.4535690 | 1.3027890  | 5.2343200  | Si | 1.4265990  | -1.9776800 | -1.5484720 |
| H  | -0.7572500 | 2.7339880  | 4.2248420  | C  | 2.0818080  | -1.7798900 | 0.2227040  |
| H  | -1.9533090 | 1.4176830  | 4.2799800  | H  | 2.4964920  | -0.7687300 | 0.3789970  |
| Na | -1.5681090 | -0.6477820 | 0.0562810  | H  | 1.2938590  | -1.9325040 | 0.9766780  |
| N  | 0.1064130  | -0.9046320 | -1.7531670 | H  | 2.9164070  | -2.4684590 | 0.4327050  |
| Si | -0.8120540 | -0.8835150 | -3.2023360 | C  | 1.1332990  | -3.8372940 | -1.8712560 |
| C  | -0.8177690 | -2.5204110 | -4.1736650 | H  | 1.3297800  | -4.0668020 | -2.9292030 |
| H  | -1.5043420 | -2.4368410 | -5.0312440 | H  | 1.8400600  | -4.4310700 | -1.2686600 |
| H  | 0.1812440  | -2.7591070 | -4.5723230 | H  | 0.1182220  | -4.1928880 | -1.6479320 |
| H  | -1.1431860 | -3.3766580 | -3.5633500 | C  | 2.9253250  | -1.6268790 | -2.6738370 |
| C  | -2.6371480 | -0.5171080 | -2.8416430 | H  | 3.6853940  | -2.4170340 | -2.5599550 |
| H  | -3.1176040 | -1.3444610 | -2.2978150 | H  | 2.6257640  | -1.5967750 | -3.7343940 |
| H  | -2.7795020 | 0.4027150  | -2.2525400 | H  | 3.4130650  | -0.6695460 | -2.4378000 |
| H  | -3.1909450 | -0.3901520 | -3.7857310 | N  | -2.0286870 | -3.0597990 | 0.8587380  |
| C  | -0.3352580 | 0.4041450  | -4.5211290 | C  | -2.9916130 | -3.2268750 | 1.9399570  |
| H  | -0.6246030 | 1.4260950  | -4.2306040 | C  | -4.3114840 | -2.4961100 | 1.7438860  |
| H  | 0.9220240  | 2.0381310  | -3.0036290 | N  | -4.2005860 | -1.0862810 | 1.3984170  |
| C  | 2.0073140  | 2.1041420  | -2.8685210 | C  | -5.5423790 | -0.5668210 | 1.1645950  |
| N  | 2.3005600  | 2.8904030  | -1.6784340 | C  | -5.6342680 | 0.8556040  | 0.6346490  |
| C  | 3.7372470  | 3.0823790  | -1.5141680 | N  | -5.0239800 | 1.0745260  | -0.6633380 |
| C  | 4.5423380  | 1.8345550  | -1.1888490 | C  | -5.1637530 | 2.4648720  | -1.0514740 |
| N  | 4.2804300  | 1.2266960  | 0.1103910  | H  | -4.6983240 | 3.1175710  | -0.2997600 |
| C  | 5.0800690  | 0.0046340  | 0.2093960  | H  | -4.6573770 | 2.6386440  | -2.0116800 |

|   |            |            |            |   |            |            |            |
|---|------------|------------|------------|---|------------|------------|------------|
| C | 4.9900730  | -0.6968790 | 1.5638430  | H | -6.2293970 | 2.7643080  | -1.1604520 |
| N | 5.2857450  | -2.1127870 | 1.4673930  | C | -5.5983650 | 0.2093930  | -1.6740940 |
| C | 4.9674100  | -2.7941100 | 2.7021450  | H | -6.7082350 | 0.2891950  | -1.7072510 |
| H | 3.9046050  | -2.6460770 | 2.9448840  | H | -5.2046100 | 0.4818590  | -2.6606550 |
| H | 5.1467830  | -3.8730050 | 2.5915150  | H | -5.3270450 | -0.8397130 | -1.4946480 |
| H | -3.2377430 | -4.3030540 | 2.0765120  | H | -6.7207780 | 1.1053570  | 0.5998620  |
| H | -2.5031540 | -2.9029050 | 2.8726130  | H | -5.1874540 | 1.5567500  | 1.3551650  |
| C | -2.5927160 | -3.3894310 | -0.4419480 | H | -6.1286850 | -0.5980560 | 2.1104610  |
| H | -1.8289750 | -3.2333870 | -1.2185810 | H | -6.0557240 | -1.2487210 | 0.4702360  |
| H | -2.9375840 | -4.4439880 | -0.4926430 | C | -3.5330910 | -0.3360640 | 2.4508210  |
| H | -3.4440700 | -2.7315680 | -0.6649170 | H | -2.5509540 | -0.7726180 | 2.6664950  |
| C | -0.8674830 | -3.8992120 | 1.1230950  | H | -3.3507470 | 0.6989800  | 2.1376280  |
| H | -0.0794100 | -3.7014190 | 0.3878800  | H | -4.1263060 | -0.3321950 | 3.3918460  |
| H | -0.4685720 | -3.6887460 | 2.1242700  | H | -4.9014020 | -2.6296000 | 2.6785500  |
| H | -1.1305280 | -4.9764940 | 1.0746360  | H | -4.8890770 | -2.9921270 | 0.9486170  |

**Table S123.** Geometric coordinates and single point energies for NaHMDS PMDTA/toluene mixed disolvated open dimer.

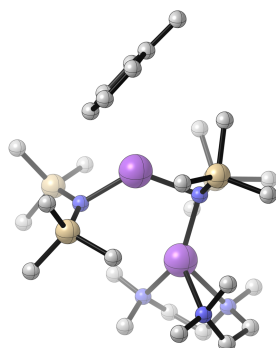

G = -2860.817235 Hartrees

G<sub>SP</sub> = -2862.894435 Hartrees

| Atom | X          | Y          | Z          | Atom | X          | Y          | Z          |
|------|------------|------------|------------|------|------------|------------|------------|
| Na   | -1.9847120 | -0.2245020 | 0.0750880  | C    | -0.5469580 | -4.3153440 | 1.3253130  |
| Na   | 1.4742940  | 0.0906500  | -0.1416620 | H    | -1.3249790 | -4.0876530 | 2.0676090  |
| N    | 1.1065740  | 2.3068110  | 0.0996460  | H    | -1.0406420 | -4.7047750 | 0.4211980  |
| Si   | 0.6538180  | 2.6288470  | 1.6981830  | H    | 0.0705360  | -5.1269530 | 1.7416230  |
| C    | -0.6030870 | 1.3145260  | 2.2909130  | C    | 1.0702060  | -2.0248010 | 2.5428050  |
| H    | -0.2805210 | 0.2974270  | 2.0079010  | H    | 1.7672570  | -1.1825840 | 2.3896480  |
| H    | -0.6991940 | 1.3329040  | 3.3885210  | H    | 0.2200910  | -1.6415140 | 3.1273870  |
| H    | -1.6071020 | 1.4938020  | 1.8737970  | H    | 1.5944420  | -2.7636920 | 3.1694910  |
| C    | -0.1608920 | 4.3188770  | 1.9981450  | Si   | -0.0921540 | -1.9773550 | -1.8925440 |
| H    | 0.5925210  | 5.1213050  | 1.9508740  | C    | 1.6195400  | -1.9308190 | -2.7283100 |
| H    | -0.9232680 | 4.5462900  | 1.2357720  | H    | 1.5041570  | -2.0420180 | -3.8186400 |
| H    | -0.6353940 | 4.3670430  | 2.9914400  | H    | 2.1397000  | -0.9705400 | -2.5654070 |
| C    | 2.0692320  | 2.5069250  | 2.9653140  | H    | 2.2851430  | -2.7313070 | -2.3740060 |
| H    | 1.7386340  | 2.8036010  | 3.9735210  | C    | -0.8639380 | -3.6319270 | -2.4042280 |
| H    | 2.4490820  | 1.4737580  | 3.0331440  | H    | -1.0095420 | -3.6967150 | -3.4937790 |
| H    | 2.9121910  | 3.1570700  | 2.6807660  | H    | -0.2036150 | -4.4620940 | -2.1058680 |
| Si   | 1.7873050  | 3.3449790  | -1.0630470 | H    | -1.8347970 | -3.7990240 | -1.9131190 |
| C    | 0.8652520  | 4.9854810  | -1.3426590 | C    | -1.0078960 | -0.5432550 | -2.7360880 |

|    |            |            |            |   |            |            |            |
|----|------------|------------|------------|---|------------|------------|------------|
| H  | -0.1931330 | 4.8333400  | -1.6031620 | H | -0.4302160 | 0.3829210  | -2.5750420 |
| H  | 0.8994990  | 5.6185010  | -0.4427500 | H | -1.0989450 | -0.6925240 | -3.8232490 |
| H  | 1.3352440  | 5.5490640  | -2.1646480 | H | -2.0194440 | -0.3767860 | -2.3378000 |
| C  | 3.5712540  | 3.8928180  | -0.6869920 | N | -3.0059820 | 1.8388410  | -0.8810520 |
| H  | 4.2856530  | 3.0573680  | -0.6324860 | C | -4.0800630 | 1.4413220  | -1.7832910 |
| H  | 3.9381610  | 4.5957420  | -1.4519700 | C | -5.0161320 | 0.3975760  | -1.1933180 |
| H  | 3.6019750  | 4.4138550  | 0.2842380  | N | -4.3624770 | -0.8807090 | -0.9098090 |
| C  | 1.8004510  | 2.4863250  | -2.7620470 | C | -5.0611230 | -1.6202960 | 0.1367780  |
| H  | 0.7702730  | 2.3864750  | -3.1407340 | C | -4.9617020 | -1.0015740 | 1.5238340  |
| H  | 2.3721940  | 3.0633350  | -3.5057010 | N | -3.6017080 | -0.7697370 | 1.9865310  |
| H  | 2.2339320  | 1.4722480  | -2.7291510 | C | -3.6311160 | -0.0827690 | 3.2686810  |
| N  | -0.0821990 | -1.6816840 | -0.2021580 | H | -4.1173560 | 0.8981210  | 3.1617920  |
| Si | 0.5688590  | -2.8343770 | 0.8972170  | H | -4.1866540 | -0.6647850 | 4.0326490  |
| C  | 2.1673620  | -3.6335870 | 0.2498640  | H | -2.6079450 | 0.0803890  | 3.6272910  |
| H  | 2.8871630  | -2.8636260 | -0.0694950 | C | -2.8517900 | -2.0111000 | 2.0948880  |
| H  | 2.6473400  | -4.2404860 | 1.0347290  | H | -2.7148230 | -2.4838870 | 1.1113650  |
| H  | 1.9710040  | -4.2916520 | -0.6123620 | H | -1.8488320 | -1.7975220 | 2.4895620  |
| H  | -2.6898980 | 2.9769710  | 0.8487090  | H | -3.3450110 | -2.7430810 | 2.7694600  |
| H  | -4.2344520 | 3.3282340  | 0.0270350  | H | -5.5045430 | -1.6717650 | 2.2264760  |
| C  | 4.9095890  | -1.0269890 | -1.0214860 | H | -5.4954540 | -0.0387570 | 1.5558780  |
| C  | 4.3299280  | 0.1899430  | -0.6568640 | H | -4.6486200 | -2.6401420 | 0.1578560  |
| C  | 4.1346510  | 0.5028500  | 0.6911370  | H | -6.1387130 | -1.7338510 | -0.1102870 |
| C  | 4.5251500  | -0.4167810 | 1.6680240  | C | -4.3016090 | -1.6985610 | -2.1155710 |
| C  | 5.1096170  | -1.6263230 | 1.2979640  | H | -3.8777950 | -1.1266780 | -2.9503320 |
| C  | 5.3106370  | -1.9507740 | -0.0501920 | H | -3.6573510 | -2.5727590 | -1.9496540 |
| C  | 5.8874530  | -3.2843420 | -0.4423390 | H | -5.3091130 | -2.0497840 | -2.4188320 |
| H  | 6.6208700  | -3.6352030 | 0.2960760  | H | -5.4475930 | 0.7952300  | -0.2658340 |
| H  | 5.0864850  | -4.0389580 | -0.5019120 | H | -5.8697640 | 0.2495920  | -1.8862280 |
| H  | 6.3765080  | -3.2360650 | -1.4241840 | H | -3.6220570 | 1.0543990  | -2.7066810 |
| H  | 5.4140250  | -2.3385260 | 2.0685560  | H | -4.6861350 | 2.3251680  | -2.0795670 |
| H  | 4.3819720  | -0.1809540 | 2.7244110  | C | -2.0542980 | 2.7042460  | -1.5720960 |

|   |            |            |            |   |            |           |            |
|---|------------|------------|------------|---|------------|-----------|------------|
| H | 3.6819430  | 1.4579160  | 0.9680980  | H | -1.1622590 | 2.8511690 | -0.9445410 |
| H | 4.0425420  | 0.9112480  | -1.4266580 | H | -1.7332450 | 2.2263030 | -2.5077560 |
| H | 5.0556530  | -1.2616700 | -2.0784640 | H | -2.5044030 | 3.6873210 | -1.8215500 |
| H | -4.0276200 | 1.8156530  | 0.9764820  | C | -3.5230890 | 2.5205140 | 0.2987200  |



**Table S124.** Geometric coordinates and single point energies for NaHMDS PMDTA monosolvated monomer.

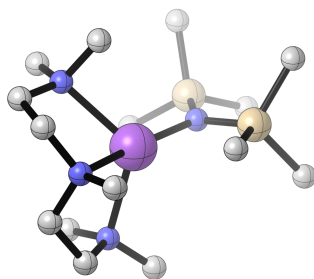

G = -1554.884204 Hartrees

G<sub>SP</sub> = -1556.068039 Hartrees

| Atom   | X          | Y          | Z          | Atom | X          | Y          | Z          |
|--------|------------|------------|------------|------|------------|------------|------------|
| Symbol | X          | Y          | Z          | H    | -1.2397320 | 4.1677740  | 0.4232550  |
| Si     | 2.6891480  | 0.9874910  | -0.6808380 | H    | 0.1148840  | 3.1481360  | -0.1583110 |
| N      | 1.6217800  | -0.1072420 | 0.0473230  | C    | -0.8257520 | 1.9766180  | 1.9758090  |
| Si     | 1.9838610  | -1.4142930 | 1.0565060  | H    | -1.1234300 | 1.0555260  | 2.4993620  |
| C      | 2.8576040  | -2.8770490 | 0.2197320  | H    | 0.2648090  | 1.9341630  | 1.8372340  |
| H      | 3.8527290  | -2.5767000 | -0.1429740 | H    | -1.0803570 | 2.8398850  | 2.6246460  |
| H      | 2.9903530  | -3.7259920 | 0.9092590  | H    | -3.3029450 | 2.8977840  | 1.3567830  |
| H      | 2.2807570  | -3.2271670 | -0.6509900 | H    | -3.3051420 | 2.2160850  | -0.2745000 |
| C      | 3.0052540  | -0.9837930 | 2.5983140  | H    | -3.2365920 | 0.6917370  | 2.3886690  |
| H      | 2.5137670  | -0.1849450 | 3.1764590  | H    | -4.6089230 | 0.8323670  | 1.2903690  |
| H      | 3.1533310  | -1.8506980 | 3.2615800  | C    | -3.2688750 | -1.6153520 | 1.5163840  |
| H      | 4.0003130  | -0.6119890 | 2.3047710  | H    | -2.8776200 | -2.5262650 | 1.0452860  |
| C      | 0.3305660  | -2.1324720 | 1.7177570  | H    | -2.7476240 | -1.4961130 | 2.4759840  |
| H      | -0.3210640 | -2.4765260 | 0.8932980  | H    | -4.3504160 | -1.7622870 | 1.7159920  |
| H      | 0.4971090  | -3.0003620 | 2.3737800  | C    | 4.3658890  | 0.2419820  | -1.1752220 |
| H      | -0.2245280 | -1.3839830 | 2.3118540  | H    | 4.9050640  | -0.1351940 | -0.2907420 |
| Na     | -0.6057500 | -0.0843110 | 0.0706470  | H    | 4.2257110  | -0.6053730 | -1.8649950 |
| N      | -3.0270010 | -0.4558270 | 0.6694850  | H    | 5.0132530  | 0.9830110  | -1.6704360 |
| C      | -3.6320490 | -0.6345170 | -0.6502710 | C    | 1.9528820  | 1.6968780  | -2.2864070 |

|   |            |            |            |   |            |            |            |
|---|------------|------------|------------|---|------------|------------|------------|
| C | -2.8514420 | -1.5757600 | -1.5660940 | H | 0.9581800  | 2.1412680  | -2.1172470 |
| N | -1.5126280 | -1.0938980 | -1.8628660 | H | 2.5963030  | 2.4753020  | -2.7258620 |
| C | -0.6136020 | -2.1409660 | -2.3234870 | H | 1.8417560  | 0.8936710  | -3.0336040 |
| H | 0.4081100  | -1.7381930 | -2.3828560 | C | 3.1094590  | 2.4811880  | 0.4245210  |
| H | -0.6035160 | -2.9696500 | -1.6011070 | H | 2.2137440  | 3.0638200  | 0.6952200  |
| H | -0.9075970 | -2.5420050 | -3.3150840 | H | 3.5650530  | 2.1309090  | 1.3646910  |
| C | -1.5051400 | 0.0355570  | -2.7775290 | H | 3.8198850  | 3.1688210  | -0.0615700 |
| H | -2.0888530 | 0.8743170  | -2.3696600 | H | -4.6716880 | -1.0123130 | -0.5527300 |
| H | -0.4736160 | 0.3875400  | -2.9152380 | C | -3.5010750 | 0.7621220  | 1.3234820  |
| H | -1.9251700 | -0.2284190 | -3.7704760 | C | -2.9211310 | 2.0509640  | 0.7450150  |
| H | -2.7575290 | -2.5615910 | -1.0861020 | N | -1.4695810 | 2.0601370  | 0.6717550  |
| H | -3.4441650 | -1.7351190 | -2.4925230 | C | -0.9785440 | 3.2089230  | -0.0703230 |
| H | -3.7101670 | 0.3490720  | -1.1340370 | H | -1.4055600 | 3.2142280  | -1.0838850 |

**Table S125.** Geometric coordinates and single point energies for sodium cation solvated by 2 equivalents of PMDTA. The green bonds indicate N–Na contacts that are longer than those observed in the dimeric and monomeric species.

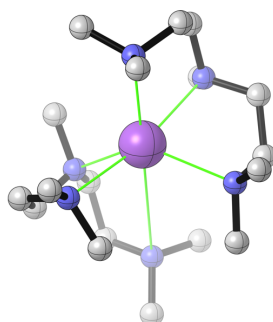

G = -1202.270772 Hartrees

G<sub>SP</sub> = -1203.491449 Hartrees

| Atom | X          | Y          | Z          | Atom | X          | Y          | Z          |
|------|------------|------------|------------|------|------------|------------|------------|
| Na   | -0.4940170 | -0.1996320 | 0.1123120  | C    | 0.2495330  | -1.5280930 | -2.3040120 |
| N    | 1.2943170  | -1.1613720 | -1.3580710 | H    | -0.5675980 | -2.0549330 | -1.7941590 |
| C    | 1.8726960  | -2.3509430 | -0.7398090 | H    | -0.1680800 | -0.6220870 | -2.7663850 |
| C    | 0.8857040  | -3.1742040 | 0.0740940  | H    | 0.6258020  | -2.1817730 | -3.1168440 |
| N    | 0.1714890  | -2.4001780 | 1.0867160  | N    | -1.4186380 | 1.7510820  | -1.1499810 |
| C    | -0.7222840 | -3.2821440 | 1.8257180  | C    | -1.5335630 | 2.8029730  | -0.1322420 |
| H    | -1.2937800 | -2.7078230 | 2.5676650  | C    | -0.3883960 | 2.7964840  | 0.8692520  |
| H    | -1.4282250 | -3.7673840 | 1.1364950  | N    | -0.3754470 | 1.6431990  | 1.7739980  |
| H    | -0.1659480 | -4.0782280 | 2.3591260  | C    | 0.8853930  | 1.6452180  | 2.5135520  |
| C    | 1.0949280  | -1.7403920 | 2.0039150  | H    | 0.8751130  | 0.8620890  | 3.2821070  |
| H    | 1.6697280  | -0.9546350 | 1.4873310  | H    | 1.7177530  | 1.4461650  | 1.8239700  |
| H    | 0.5193390  | -1.2709960 | 2.8135230  | H    | 1.0550090  | 2.6148490  | 3.0226010  |
| H    | 1.8072420  | -2.4554030 | 2.4643840  | C    | -1.4915560 | 1.6843420  | 2.7121710  |
| H    | 0.1404380  | -3.6570990 | -0.5765340 | H    | -2.4541120 | 1.6622400  | 2.1844640  |
| H    | 1.4591080  | -3.9980580 | 0.5493690  | H    | -1.4518550 | 0.8073880  | 3.3737340  |
| H    | 2.6843410  | -2.0349270 | -0.0731990 | H    | -1.4663220 | 2.5949100  | 3.3433720  |
| H    | 2.3285750  | -3.0156560 | -1.5041440 | H    | 0.5680200  | 2.7972740  | 0.3242190  |
| C    | 2.3074900  | -0.3598900 | -2.0523540 | H    | -0.4206570 | 3.7396550  | 1.4536490  |

|   |            |            |            |   |            |            |            |
|---|------------|------------|------------|---|------------|------------|------------|
| C | 3.5410570  | 0.0027030  | -1.2351380 | H | -2.4864730 | 2.6966070  | 0.4008190  |
| N | 3.2685040  | 0.7924460  | -0.0410750 | H | -3.2877330 | -0.4945330 | 1.8081890  |
| C | 4.2788320  | 0.5803100  | 0.9829450  | C | -3.5301610 | -1.1944540 | 0.9958450  |
| H | 4.3102670  | -0.4806060 | 1.2716730  | N | -2.9480100 | -0.7341810 | -0.2609880 |
| H | 5.2933670  | 0.8790120  | 0.6493590  | C | -3.5506990 | 0.5399450  | -0.6532560 |
| H | 4.0331840  | 1.1687460  | 1.8791060  | C | -2.7270600 | 1.3325470  | -1.6586150 |
| C | 3.1717610  | 2.2031600  | -0.3707060 | H | -3.3215830 | 2.2075090  | -1.9920950 |
| H | 2.4042680  | 2.3651040  | -1.1409840 | H | -2.5554180 | 0.7208290  | -2.5580630 |
| H | 2.8949870  | 2.7890180  | 0.5178780  | H | -3.6980880 | 1.1366950  | 0.2591180  |
| H | 4.1292370  | 2.6074690  | -0.7590530 | H | -4.5645680 | 0.3811310  | -1.0739610 |
| H | 4.0726240  | -0.9122130 | -0.9407440 | C | -3.1604000 | -1.7476390 | -1.2882560 |
| H | 4.2387940  | 0.5358620  | -1.9134650 | H | -2.7608620 | -1.4156970 | -2.2554300 |
| H | 2.6624790  | -0.8983550 | -2.9566250 | H | -2.6468230 | -2.6788750 | -1.0070750 |
| H | 1.8135120  | 0.5573360  | -2.4111900 | H | -4.2368520 | -1.9746280 | -1.4207690 |
| H | 0.3966700  | 2.5415280  | -1.8749210 | H | -4.6324910 | -1.2855860 | 0.9316740  |
| H | -0.4348360 | 1.4363010  | -2.9943700 | H | -3.1234360 | -2.1793620 | 1.2544720  |
| H | -1.0465240 | 3.0961650  | -2.7639700 | H | -1.5736050 | 3.7989550  | -0.6143100 |
|   |            |            |            | C | -0.5874930 | 2.2292410  | -2.2497080 |

**Table S126.** Geometric coordinates and single point energies for NaHMDS diglyme disolvated dimer.

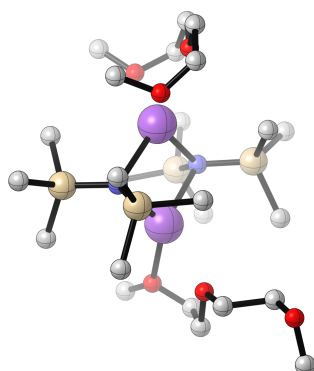

G = -2993.531565 Hartrees

G<sub>SP</sub> = -2995.78937 Hartrees

| Atom | X          | Y          | Z          | Atom | X          | Y          | Z          |
|------|------------|------------|------------|------|------------|------------|------------|
| C    | -2.7622180 | 3.8076740  | -0.6780900 | H    | 1.5275570  | 3.3473570  | -3.3648470 |
| Si   | -1.1180060 | 2.8715390  | -0.9178130 | H    | 2.8405550  | 2.4048460  | -4.1590010 |
| N    | -0.6658440 | 1.7224390  | 0.2689530  | Si   | -0.1848090 | 2.2177750  | 1.8364960  |
| Na   | 1.0208450  | 0.3546640  | -0.7953820 | C    | 1.6668110  | 2.6511430  | 1.9275950  |
| Na   | -1.6666790 | -0.4804180 | 0.3222480  | H    | 2.2803870  | 1.8481910  | 1.4869460  |
| N    | -0.0565070 | -1.7753170 | -0.9180740 | H    | 1.8626760  | 3.5748790  | 1.3579640  |
| Si   | -0.6212030 | -2.1379630 | -2.4880110 | H    | 2.0081590  | 2.8132600  | 2.9624820  |
| C    | -0.7276990 | -3.9838710 | -2.9367280 | C    | -0.5006830 | 0.8550640  | 3.1182550  |
| H    | -1.1142680 | -4.0984070 | -3.9620900 | H    | -1.5822180 | 0.6680120  | 3.2100140  |
| H    | 0.2576580  | -4.4744320 | -2.8955020 | H    | -0.0143620 | -0.0905580 | 2.8345920  |
| H    | -1.4027570 | -4.5355140 | -2.2631350 | H    | -0.1148030 | 1.1462150  | 4.1078130  |
| C    | -2.3883760 | -1.4725450 | -2.6815540 | C    | -1.0947480 | 3.7411130  | 2.5266960  |
| H    | -3.0754260 | -2.0472390 | -2.0374620 | H    | -0.7125810 | 3.9899210  | 3.5295570  |
| H    | -2.4308330 | -0.4188080 | -2.3686840 | H    | -0.9646950 | 4.6292130  | 1.8888570  |
| H    | -2.7607360 | -1.5367030 | -3.7158980 | H    | -2.1772580 | 3.5556590  | 2.6208600  |
| C    | 0.4542950  | -1.3738190 | -3.8579130 | C    | -1.3269470 | 2.0648470  | -2.6258300 |
| H    | 0.5971910  | -0.2928270 | -3.7054010 | H    | -0.6400850 | 1.2232520  | -2.8057830 |

|    |            |            |            |   |            |            |            |
|----|------------|------------|------------|---|------------|------------|------------|
| H  | 1.4529570  | -1.8392420 | -3.8446210 | H | -1.1899860 | 2.7967760  | -3.4375420 |
| H  | 0.0216540  | -1.5181960 | -4.8603870 | H | -2.3503790 | 1.6677090  | -2.7101070 |
| Si | 1.0710020  | -2.7591800 | -0.0920950 | C | 0.1458330  | 4.2908000  | -1.0962030 |
| C  | 1.4807820  | -1.9695210 | 1.5888990  | H | 0.1542260  | 4.9156380  | -0.1883430 |
| H  | 1.7004300  | -0.8892900 | 1.5309290  | H | 1.1675190  | 3.9124930  | -1.2402190 |
| H  | 0.5893470  | -2.0919140 | 2.2230660  | H | -0.1015180 | 4.9474770  | -1.9462860 |
| H  | 2.3250500  | -2.4591210 | 2.1006600  | H | -3.6220830 | 3.1621740  | -0.9091210 |
| C  | 0.5600560  | -4.5346210 | 0.3551030  | H | -2.7917570 | 4.6588660  | -1.3774710 |
| H  | 0.1871910  | -5.0992320 | -0.5121230 | H | -2.8854800 | 4.2081170  | 0.3393440  |
| H  | 1.4354560  | -5.0735550 | 0.7526270  | C | -4.0907510 | 1.3203750  | 0.8740970  |
| H  | -0.2145700 | -4.5338040 | 1.1354940  | C | -4.4918550 | 0.3173730  | 1.9338110  |
| C  | 2.6737320  | -2.9728740 | -1.1075570 | H | -4.7201000 | 0.8367100  | 2.8831850  |
| H  | 3.4747840  | -3.4863120 | -0.5512910 | H | -5.3928750 | -0.2517940 | 1.6326250  |
| H  | 2.4522350  | -3.5806370 | -2.0005010 | O | -3.4022540 | -0.5531570 | 2.0854850  |
| H  | 3.0581070  | -2.0024280 | -1.4624990 | C | -3.6202500 | -1.6599770 | 2.9162790  |
| O  | 2.2163130  | 1.6848150  | -2.3182400 | C | -2.3333410 | -2.4698530 | 2.9096030  |
| C  | 3.2542630  | 2.2766610  | -1.5641790 | H | -2.5051400 | -3.4520390 | 3.3881150  |
| C  | 4.1694360  | 1.2059500  | -1.0273240 | H | -1.5595440 | -1.9334250 | 3.4772940  |
| H  | 4.9803920  | 1.6922090  | -0.4547600 | O | -1.8245820 | -2.6189720 | 1.6120040  |
| H  | 4.6239220  | 0.6389430  | -1.8605760 | C | -2.6214750 | -3.3810200 | 0.7387520  |
| O  | 3.4364090  | 0.3291360  | -0.2024470 | H | -2.0293550 | -3.5318140 | -0.1724400 |
| C  | 4.2711880  | -0.5113540 | 0.5781480  | H | -2.8725100 | -4.3611890 | 1.1821730  |
| C  | 4.5416440  | 0.1034060  | 1.9483320  | H | -3.5577820 | -2.8535000 | 0.4769140  |
| H  | 4.8923200  | 1.1492400  | 1.8412610  | H | -3.8628170 | -1.3484060 | 3.9490410  |
| H  | 3.6022510  | 0.1320790  | 2.5199920  | H | -4.4755350 | -2.2525190 | 2.5379250  |
| O  | 5.4577920  | -0.6706810 | 2.6712910  | H | -4.8751960 | 2.0854120  | 0.7418210  |
| C  | 6.7979080  | -0.3599360 | 2.4213860  | H | -3.1623210 | 1.8239330  | 1.1835320  |
| H  | 7.0372680  | 0.6737060  | 2.7322740  | O | -3.8022490 | 0.6744570  | -0.3462350 |
| H  | 7.4170110  | -1.0535630 | 3.0035040  | C | -4.9222360 | 0.4946130  | -1.1765310 |
| H  | 7.0675260  | -0.4686410 | 1.3546900  | H | -5.3510560 | 1.4699370  | -1.4669970 |
| H  | 5.2162660  | -0.7013670 | 0.0398080  | H | -4.5886960 | -0.0347920 | -2.0763940 |

|   |           |            |            |   |            |            |            |
|---|-----------|------------|------------|---|------------|------------|------------|
| H | 3.7673730 | -1.4752260 | 0.7004780  | H | -5.7089240 | -0.1043170 | -0.6844210 |
| H | 3.8442890 | 2.9653680  | -2.1916430 | C | 1.9320830  | 2.3369290  | -3.5371450 |
| H | 2.8289940 | 2.8517490  | -0.7243910 | H | 1.1836140  | 1.7403740  | -4.0699210 |

**Table S127.** Geometric coordinates and single point energies for NaHMDS diglyme monosolvated monomer.

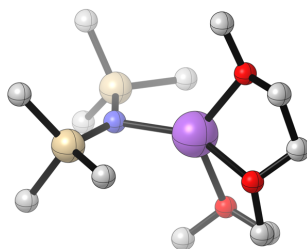

G = -1496.760861 Hartrees

G<sub>SP</sub> = -1497.89186 Hartrees

| Atom | X          | Y          | Z          | Atom | X          | Y          | Z          |
|------|------------|------------|------------|------|------------|------------|------------|
| Si   | -2.2425320 | 0.5847510  | -1.2769620 | C    | 1.3565430  | 3.2822750  | 0.5438790  |
| N    | -1.3870850 | 0.0202350  | 0.0641940  | H    | 0.3500730  | 3.2759190  | 0.1077510  |
| Si   | -1.7620900 | -0.5669460 | 1.5996000  | H    | 1.2693530  | 3.2789700  | 1.6433600  |
| C    | -2.7942470 | 0.6006230  | 2.6829670  | H    | 1.8909050  | 4.1927090  | 0.2247870  |
| H    | -3.7967870 | 0.7415320  | 2.2487880  | H    | 3.9164420  | 0.6732620  | -0.9870560 |
| H    | -2.9214130 | 0.2154340  | 3.7071400  | H    | 4.8792450  | 0.4835000  | 0.5121670  |
| H    | -2.3192410 | 1.5926150  | 2.7424800  | H    | 3.0011550  | -3.0176590 | -1.5438930 |
| C    | -2.6613990 | -2.2413570 | 1.6095560  | H    | 3.3485820  | -1.3364330 | -2.0015130 |
| H    | -2.0807190 | -3.0028140 | 1.0644330  | C    | 0.5455350  | -2.6985410 | -1.1011060 |
| H    | -2.8355640 | -2.6130550 | 2.6319140  | H    | 0.7791040  | -3.1894170 | -0.1403460 |
| H    | -3.6392510 | -2.1552860 | 1.1099380  | H    | -0.4537770 | -2.2477390 | -1.0256950 |
| C    | -0.1180740 | -0.8532310 | 2.5349350  | H    | 0.5747080  | -3.4490030 | -1.9080090 |
| H    | 0.4499690  | 0.0884210  | 2.6369210  | C    | -3.2725740 | 2.1497320  | -0.9643070 |
| H    | -0.2716150 | -1.2530830 | 3.5492560  | H    | -4.0665640 | 1.9501830  | -0.2275480 |
| H    | 0.5203990  | -1.5753230 | 1.9947140  | H    | -2.6415110 | 2.9550920  | -0.5554520 |
| Na   | 0.7989960  | 0.2225360  | -0.1968220 | H    | -3.7502010 | 2.5218500  | -1.8846620 |
| O    | 1.4492020  | -1.6426660 | -1.3747500 | C    | -0.9786400 | 1.0397800  | -2.6342870 |
| C    | 2.8138390  | -1.9641030 | -1.2718630 | H    | -0.3599070 | 0.1643020  | -2.8964420 |
| C    | 3.3173220  | -1.6913490 | 0.1403950  | H    | -1.4607110 | 1.3938080  | -3.5587040 |
| H    | 2.8206680  | -2.3621980 | 0.8566440  | H    | -0.3038020 | 1.8458200  | -2.2942070 |



|   |           |            |           |   |            |            |            |
|---|-----------|------------|-----------|---|------------|------------|------------|
| H | 4.4057440 | -1.8679070 | 0.2076180 | C | -3.4237940 | -0.6844600 | -2.0530900 |
| O | 2.9939190 | -0.3797090 | 0.5527570 | H | -2.8868370 | -1.6094490 | -2.3176410 |
| C | 3.8597490 | 0.6408430  | 0.1167150 | H | -4.2175310 | -0.9568980 | -1.3394330 |
| C | 3.3097460 | 1.9522770  | 0.6284670 | H | -3.9073580 | -0.2980900 | -2.9643530 |
| H | 3.2607910 | 1.9273550  | 1.7326930 | H | 3.9760470  | 2.7807230  | 0.3264500  |
|   |           |            |           | O | 2.0232420  | 2.1247650  | 0.0911280  |

**Table S128** Geometric coordinates and single point energies for sodium cation solvated by 2 equivalents of diglyme.

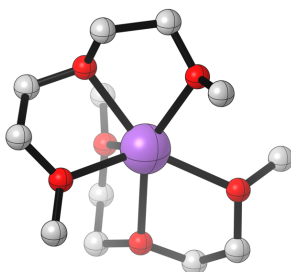

G = -1086.045878 Hartrees

G<sub>SP</sub> = -1087.154175 Hartrees

| Atom | X         | Y          | Z          | Atom | X          | Y          | Z          |
|------|-----------|------------|------------|------|------------|------------|------------|
| Na   | 0.0001490 | 0.2279490  | -0.0000940 | O    | -0.6926860 | -1.3369500 | 1.5407340  |
| O    | 0.6920520 | -1.3378920 | -1.5404950 | C    | -1.9639070 | -1.9117670 | 1.3492880  |
| C    | 1.9629960 | -1.9132290 | -1.3488000 | C    | -2.2685200 | -1.8833630 | -0.1379550 |
| C    | 2.2675550 | -1.8843820 | 0.1384450  | H    | -3.2850190 | -2.2687090 | -0.3266400 |
| H    | 3.2838960 | -2.2700320 | 0.3273450  | H    | -1.5441250 | -2.5214850 | -0.6632050 |
| H    | 1.5428640 | -2.5219630 | 0.6639370  | O    | -2.1052920 | -0.5933940 | -0.6881340 |
| O    | 2.1048720 | -0.5940810 | 0.6880600  | C    | -3.1449080 | 0.3268640  | -0.4344770 |
| C    | 3.1450260 | 0.3255110  | 0.4341300  | C    | -2.6614680 | 1.6697840  | -0.9421500 |
| C    | 2.6623820 | 1.6688250  | 0.9414850  | H    | -2.4368830 | 1.5888280  | -2.0158560 |
| H    | 2.4378610 | 1.5883210  | 2.0152480  | H    | -3.4382790 | 2.4399960  | -0.8090420 |
| H    | 3.4395950 | 2.4385680  | 0.8080800  | O    | -1.4627390 | 2.0407760  | -0.2903310 |
| O    | 1.4638320 | 2.0401540  | 0.2895040  | C    | -1.6325990 | 2.8697310  | 0.8427320  |
| C    | 1.6338690 | 2.8705980  | -0.8424490 | H    | -2.2560480 | 2.3839560  | 1.6128320  |
| H    | 2.2580940 | 2.3861250  | -1.6127310 | H    | -0.6328040 | 3.0567430  | 1.2529720  |
| H    | 0.6342060 | 3.0574940  | -1.2530570 | H    | -2.0976560 | 3.8274900  | 0.5597980  |
| H    | 2.0981480 | 3.8283030  | -0.5580650 | H    | -3.3648690 | 0.3841680  | 0.6472240  |
| H    | 3.3648990 | 0.3824730  | -0.6476090 | H    | -4.0704090 | 0.0260320  | -0.9560400 |
| H    | 4.0703730 | 0.0242160  | 0.9556980  | H    | -2.7218980 | -1.3626180 | 1.9388960  |
| H    | 2.7212630 | -1.3646440 | -1.9385700 | H    | -1.9760810 | -2.9603800 | 1.6972710  |

|   |            |            |            |   |            |            |           |
|---|------------|------------|------------|---|------------|------------|-----------|
| H | 1.9746990  | -2.9619810 | -1.6963770 | C | -0.2038690 | -1.4495260 | 2.8599810 |
| C | 0.2031710  | -1.4508040 | -2.8596820 | H | -0.1454200 | -2.5071180 | 3.1665500 |
| H | 0.1442380  | -2.5085000 | -3.1658030 | H | 0.8028580  | -1.0145320 | 2.8680890 |
| H | -0.8033610 | -1.0153620 | -2.8679640 | H | -0.8510160 | -0.9096620 | 3.5714780 |
| H | 0.8505470  | -0.9115320 | -3.5714190 |   |            |            |           |

**Table S129.** Geometric coordinates and single point energies for sodium cation solvated by 2 equivalents of 12-crown-4.

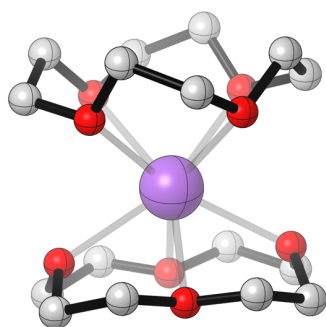

G = -1390.901291 Hartrees

G<sub>SP</sub> = -1392.347785 Hartrees

| Atom | X         | Y          | Z          | Atom | X          | Y          | Z          |
|------|-----------|------------|------------|------|------------|------------|------------|
| Na   | 0.1617200 | -0.0003450 | 0.0000630  | C    | -1.9426210 | 0.4378040  | 2.5184860  |
| O    | 1.3990120 | -2.1242230 | 0.1130100  | C    | -2.4558700 | -0.8475550 | 1.9011890  |
| C    | 2.1798230 | -2.3487360 | -1.0465480 | O    | -1.3737450 | -1.4506560 | 1.2324280  |
| C    | 1.8214300 | -1.3210180 | -2.1034110 | C    | -1.7001250 | -2.5659990 | 0.4283070  |
| H    | 2.4793660 | -1.4532230 | -2.9812460 | C    | -2.3019370 | -2.1334100 | -0.8942180 |
| H    | 0.7724950 | -1.4507900 | -2.4248750 | H    | -3.2670070 | -1.6189970 | -0.7361250 |
| O    | 2.0081350 | -0.0653950 | -1.5013830 | H    | -2.5008540 | -3.0200190 | -1.5213470 |
| C    | 1.7246120 | 1.0861480  | -2.2526650 | H    | -0.7521450 | -3.0866140 | 0.2424650  |
| C    | 2.0625000 | 2.2663690  | -1.3570720 | H    | -2.3911570 | -3.2449770 | 0.9566200  |
| O    | 1.4058910 | 2.1216900  | -0.1115140 | H    | -2.8566080 | -1.5150140 | 2.6849980  |
| C    | 2.1856330 | 2.3434990  | 1.0492720  | H    | -3.2804880 | -0.6253850 | 1.1981490  |
| C    | 1.8218500 | 1.3170500  | 2.1054690  | H    | -2.7474240 | 0.9524760  | 3.0691130  |
| O    | 2.0060970 | 0.0608130  | 1.5038720  | H    | -1.1407840 | 0.2067560  | 3.2358840  |
| C    | 1.7179130 | -1.0897930 | 2.2547840  | H    | -3.2642310 | 1.6268970  | 0.7313200  |
| C    | 2.0531280 | -2.2711210 | 1.3596170  | H    | -2.4958350 | 3.0258850  | 1.5179830  |
| H    | 1.7534100 | -3.2127480 | 1.8489750  | H    | -0.7437130 | 3.0879320  | -0.2427090 |
| H    | 3.1432740 | -2.2949230 | 1.2046280  | H    | -2.3810370 | 3.2505020  | -0.9597730 |
| H    | 2.3267100 | -1.1417200 | 3.1754830  | H    | -3.2765890 | 0.6330500  | -1.2030150 |

|   |           |            |            |   |            |            |            |
|---|-----------|------------|------------|---|------------|------------|------------|
| H | 0.6502710 | -1.1155760 | 2.5381970  | H | -2.8477190 | 1.5216250  | -2.6890830 |
| H | 2.4782790 | 1.4472870  | 2.9847200  | H | -2.7437760 | -0.9460630 | -3.0732080 |
| H | 0.7725780 | 1.4499360  | 2.4246000  | H | -1.1348860 | -0.2043320 | -3.2364870 |
| H | 3.2535480 | 2.2264770  | 0.8055530  | O | -1.3832240 | -1.2700070 | -1.5294910 |
| H | 2.0267840 | 3.3622720  | 1.4406970  | C | -1.9388500 | -0.4334470 | -2.5208450 |
| H | 1.7667090 | 3.2089720  | -1.8469320 | C | -2.4501230 | 0.8531770  | -1.9045240 |
| H | 3.1524760 | 2.2865170  | -1.2003790 | O | -1.3677350 | 1.4535860  | -1.2337380 |
| H | 2.3346730 | 1.1360270  | -3.1726330 | C | -1.6927130 | 2.5697650  | -0.4301930 |
| H | 0.6573640 | 1.1156020  | -2.5372540 | C | -2.2980970 | 2.1387480  | 0.8912270  |
| H | 2.0179190 | -3.3668990 | -1.4383120 | O | -1.3828800 | 1.2728950  | 1.5282010  |
| H | 3.2477490 | -2.2356580 | -0.8010310 |   |            |            |            |

**Table S130.** Geometric coordinates and single point energies for NaHMDS 12-crown-4 monosolvated monomer.

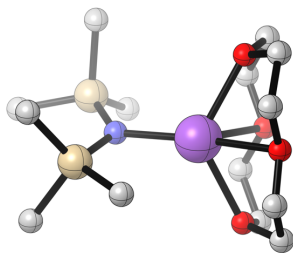

G = -1649.17557 Hartrees

G<sub>SP</sub> = -1650.476357 Hartrees

| Atom | X          | Y          | Z          | Atom | X          | Y          | Z          |
|------|------------|------------|------------|------|------------|------------|------------|
| Si   | 1.8750590  | 1.7945020  | 0.2939630  | H    | -3.9017760 | 0.7202320  | -1.9266750 |
| N    | 1.5217860  | 0.1741580  | -0.0658560 | H    | -4.2991440 | 2.2334690  | -0.0398650 |
| Si   | 2.6919430  | -1.0611770 | -0.0812830 | H    | -2.5496120 | 2.5966110  | 0.0915120  |
| C    | 4.4860620  | -0.4759390 | -0.3162600 | H    | -4.0143170 | 1.0793960  | 2.3351570  |
| H    | 5.1848570  | -1.3243310 | -0.2422990 | H    | -2.2504230 | 1.3671460  | 2.2779430  |
| H    | 4.6174510  | -0.0168690 | -1.3087690 | H    | -3.6936080 | -1.3372500 | 2.0873760  |
| H    | 4.7830920  | 0.2688330  | 0.4386350  | H    | -2.7367360 | -0.7627130 | 3.4875750  |
| C    | 2.4541200  | -2.3095270 | -1.5065620 | H    | -1.2313210 | -3.2359300 | 1.9656340  |
| H    | 2.4328540  | -1.7802420 | -2.4731520 | H    | -2.7282170 | -2.8344280 | 1.0629790  |
| H    | 3.3050830  | -3.0090400 | -1.5288870 | H    | -0.8758700 | -3.5945900 | -0.4405520 |
| H    | 1.5388220  | -2.9173490 | -1.4362580 | H    | 0.1128870  | -2.2091830 | 0.1073280  |
| C    | 2.6874800  | -2.0831720 | 1.5253390  | H    | -1.2639830 | 0.1266950  | -3.6892720 |
| H    | 2.9520230  | -1.4313600 | 2.3732350  | H    | -2.7419330 | -0.6034710 | -2.9876090 |
| H    | 1.6906320  | -2.5011620 | 1.7421150  | C    | 2.9156150  | 2.7237490  | -0.9910480 |
| H    | 3.4069370  | -2.9169000 | 1.4955940  | H    | 2.4641030  | 2.6296480  | -1.9909030 |
| Na   | -0.7377870 | 0.2179310  | 0.1436190  | H    | 2.9997570  | 3.7948410  | -0.7474830 |
| O    | -1.8463000 | 0.8607270  | -1.8365470 | H    | 3.9334940  | 2.3089550  | -1.0442010 |
| C    | -1.7376760 | -0.2125690 | -2.7538790 | C    | 0.2301310  | 2.7804390  | 0.3835120  |
| C    | -0.9103110 | -1.3171590 | -2.1240600 | H    | 0.4263570  | 3.8502770  | 0.5509160  |

|   |            |            |            |   |            |           |            |
|---|------------|------------|------------|---|------------|-----------|------------|
| H | -0.8083690 | -2.1601970 | -2.8313940 | H | -0.3344020 | 2.6923310 | -0.5602900 |
| H | 0.1020640  | -0.9430770 | -1.8766000 | H | -0.4086590 | 2.4518160 | 1.2251630  |
| O | -1.5971340 | -1.7057940 | -0.9514110 | C | 2.6920120  | 2.0920970 | 1.9845110  |
| C | -0.9213540 | -2.5585580 | -0.0575170 | H | 2.0712890  | 1.6609690 | 2.7863110  |
| C | -1.6853170 | -2.5289450 | 1.2512480  | H | 3.6803350  | 1.6097300 | 2.0408240  |
| O | -1.6590620 | -1.2123290 | 1.7683890  | H | 2.8305390  | 3.1648320 | 2.1942410  |
| C | -2.8259910 | -0.7273440 | 2.3888920  | C | -3.2846980 | 1.8255750 | -0.2034080 |
| C | -3.0611890 | 0.6998640  | 1.9237060  | C | -3.1146560 | 1.4471320 | -1.6643200 |
| O | -3.0826070 | 0.6406510  | 0.5229740  | H | -3.2336240 | 2.3395050 | -2.3028140 |

**Table S131.** Geometric coordinates and single point energies for NaHMDS 15-crown-5 monosolvated monomer.

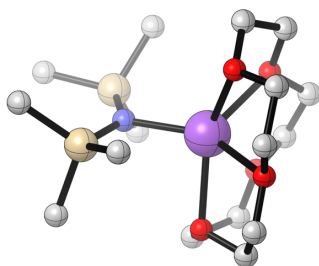

G = -1802.792272 Hartrees

G<sub>SP</sub> = -1804.266908 Hartrees

| Atom | X          | Y          | Z          | Atom | X          | Y          | Z          |
|------|------------|------------|------------|------|------------|------------|------------|
| Na   | -0.5972540 | -0.0698330 | -0.1100940 | H    | -0.3612660 | 1.2939380  | -2.8415300 |
| O    | -1.6597600 | -0.1018050 | -2.2211750 | N    | 1.6639230  | -0.1245940 | -0.2454870 |
| C    | -1.4525960 | 1.1754120  | -2.7783610 | Si   | 2.0790870  | -1.7318470 | -0.5579930 |
| C    | -2.0212990 | 2.2800670  | -1.9008150 | C    | 2.6050420  | -2.7105660 | 0.9888720  |
| O    | -1.4852230 | 2.1129080  | -0.6152890 | H    | 1.7637210  | -2.7642800 | 1.6989810  |
| C    | -2.1696410 | 2.7675410  | 0.4196290  | H    | 2.9134660  | -3.7410790 | 0.7498740  |
| C    | -1.3974330 | 2.5417410  | 1.7027400  | H    | 3.4469690  | -2.2120570 | 1.4962500  |
| O    | -1.1551220 | 1.1644920  | 1.8083360  | C    | 0.5434680  | -2.6575900 | -1.2177020 |
| C    | -0.6686530 | 0.6993100  | 3.0440550  | H    | -0.2440710 | -2.6473160 | -0.4452190 |
| C    | 0.0139730  | -0.6409260 | 2.7830760  | H    | 0.7618070  | -3.7107050 | -1.4543590 |
| O    | -0.7009810 | -1.4351080 | 1.8626710  | H    | 0.1530620  | -2.1673630 | -2.1243290 |
| C    | -2.0141570 | -1.7901800 | 2.2000020  | C    | 3.4456620  | -2.0076860 | -1.8490960 |
| C    | -2.6505000 | -2.3702640 | 0.9564920  | H    | 3.5488820  | -3.0762900 | -2.0973010 |
| O    | -2.6534250 | -1.3637150 | -0.0281110 | H    | 3.2193980  | -1.4590460 | -2.7770990 |
| C    | -3.0213010 | -1.7962200 | -1.3149670 | H    | 4.4195900  | -1.6516950 | -1.4798810 |
| C    | -2.9762960 | -0.5906030 | -2.2263150 | Si   | 2.5817220  | 1.2807750  | -0.0838410 |
| H    | -3.6850890 | 0.1661530  | -1.8451770 | C    | 1.9250670  | 2.6956690  | -1.1779830 |
| H    | -3.2867840 | -0.8746750 | -3.2481680 | H    | 0.8586350  | 2.8752240  | -0.9645020 |
| H    | -4.0419960 | -2.2215300 | -1.3123150 | H    | 2.4749070  | 3.6378210  | -1.0229350 |



|   |            |            |            |   |            |           |            |
|---|------------|------------|------------|---|------------|-----------|------------|
| H | -2.3148230 | -2.5672710 | -1.6722350 | H | 2.0174010  | 2.4201220 | -2.2416360 |
| H | -3.6810030 | -2.7050420 | 1.1764230  | C | 2.5134660  | 1.9708860 | 1.6957690  |
| H | -2.0659740 | -3.2416240 | 0.6095870  | H | 1.4645410  | 2.1621760 | 1.9743630  |
| H | -2.0327610 | -2.5345510 | 3.0173390  | H | 2.9232250  | 1.2396740 | 2.4122530  |
| H | -2.5978900 | -0.9063180 | 2.5134430  | H | 3.0713860  | 2.9135850 | 1.8114640  |
| H | 0.1706250  | -1.1766710 | 3.7369510  | C | 4.4309560  | 1.1221580 | -0.4916610 |
| H | 0.9831540  | -0.4633630 | 2.2925600  | H | 4.9074650  | 0.3509260 | 0.1353070  |
| H | -1.5038640 | 0.6199150  | 3.7659100  | H | 4.9602980  | 2.0729800 | -0.3191050 |
| H | 0.0772020  | 1.3929640  | 3.4691950  | H | 4.5806220  | 0.8351540 | -1.5441600 |
| H | -1.9943840 | 2.9115390  | 2.5565180  | H | -3.1259630 | 2.2352190 | -1.8595000 |
| H | -0.4411770 | 3.0944580  | 1.6771770  | H | -1.7449050 | 3.2633050 | -2.3238360 |
| H | -3.1905840 | 2.3503170  | 0.5130380  | H | -1.8791430 | 1.2421180 | -3.7953450 |
| H | -2.2521300 | 3.8519580  | 0.2232550  |   |            |           |            |

**Table S132.** Geometric coordinates and single point energies for sodium cation solvated by 2 equivalents of 15-crown-5.

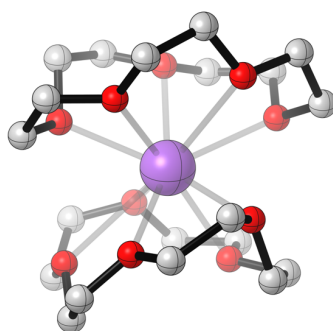

G = -1698.099228 Hartrees

G<sub>SP</sub> = -1699.900099 Hartrees

| Atom | X          | Y          | Z          | Atom | X          | Y          | Z          |
|------|------------|------------|------------|------|------------|------------|------------|
| Na   | -0.0001370 | 0.0521820  | 0.0005990  | C    | 0.7924550  | -1.9761210 | -2.3743950 |
| O    | 1.7741890  | 1.8961410  | -0.7874750 | C    | -0.4679110 | -2.7791860 | -2.0817980 |
| C    | 2.8243280  | 1.4058280  | -1.5963100 | O    | -1.1899300 | -2.1039720 | -1.0849200 |
| C    | 3.6826950  | 0.4008210  | -0.8563490 | C    | -2.4885610 | -2.5939090 | -0.8566760 |
| O    | 2.8735800  | -0.6779590 | -0.4700020 | C    | -3.4071510 | -1.4266170 | -0.5832430 |
| C    | 3.4055930  | -1.4291640 | 0.5855780  | O    | -2.8745270 | -0.6733220 | 0.4705630  |
| C    | 2.4849640  | -2.5938180 | 0.8632420  | C    | -3.6820900 | 0.4079170  | 0.8533030  |
| O    | 1.1876050  | -2.1005600 | 1.0913650  | C    | -2.8227390 | 1.4130070  | 1.5919750  |
| C    | 0.4640830  | -2.7739150 | 2.0883950  | O    | -1.7713460 | 1.9001950  | 0.7828340  |
| C    | -0.7953640 | -1.9687520 | 2.3795530  | C    | -2.1866780 | 2.8496350  | -0.1733640 |
| O    | -0.5526280 | -0.5834560 | 2.3546230  | C    | -1.2589540 | 2.8093480  | -1.3641640 |
| C    | 0.3389130  | -0.1038560 | 3.3298560  | O    | -1.1910090 | 1.4810520  | -1.8174790 |
| C    | 0.5567310  | 1.3635690  | 3.0618880  | C    | -0.5553080 | 1.3563260  | -3.0648470 |
| O    | 1.1927990  | 1.4838530  | 1.8142570  | C    | -0.3398260 | -0.1121630 | -3.3287750 |
| C    | 1.2633300  | 2.8108400  | 1.3575120  | H    | 0.0715580  | -0.2627060 | -4.3437770 |
| C    | 2.1915830  | 2.8463930  | 0.1670200  | H    | -1.3131370 | -0.6301490 | -3.2633130 |
| H    | 3.2116760  | 2.6202610  | 0.5174100  | H    | -1.1772250 | 1.7956560  | -3.8662640 |
| H    | 2.2050380  | 3.8612640  | -0.2712230 | H    | 0.4150310  | 1.8847840  | -3.0484930 |

|   |            |            |            |   |            |            |            |
|---|------------|------------|------------|---|------------|------------|------------|
| H | 1.6699760  | 3.4776550  | 2.1402470  | H | -1.6646920 | 3.4748760  | -2.1484680 |
| H | 0.2505700  | 3.1667580  | 1.1011870  | H | -0.2454420 | 3.1640560  | -1.1091660 |
| H | 1.1792390  | 1.8041430  | 3.8621610  | H | -3.2075290 | 2.6254670  | -0.5228110 |
| H | -0.4127720 | 1.8935200  | 3.0439160  | H | -2.1973380 | 3.8654090  | 0.2628590  |
| H | -0.0731200 | -0.2509320 | 4.3450970  | H | -3.4493100 | 2.2430910  | 1.9637390  |
| H | 1.3114170  | -0.6235760 | 3.2661770  | H | -2.3509520 | 0.9090560  | 2.4433160  |
| H | -1.2135900 | -2.2820560 | 3.3538210  | H | -4.1438020 | 0.8658180  | -0.0406800 |
| H | -1.5540930 | -2.1315840 | 1.6080960  | H | -4.5073080 | 0.0749110  | 1.5102340  |
| H | 1.0895790  | -2.8739790 | 2.9952340  | H | -3.4854450 | -0.7972550 | -1.4904340 |
| H | 0.1814400  | -3.7957820 | 1.7742840  | H | -4.4171970 | -1.8051210 | -0.3374170 |
| H | 2.8608070  | -3.1353740 | 1.7486430  | H | -2.8646370 | -3.1373740 | -1.7407860 |
| H | 2.4847170  | -3.3039860 | 0.0164170  | H | -2.4905680 | -3.3015250 | -0.0077460 |
| H | 3.4857840  | -0.7973230 | 1.4908790  | H | -1.0939950 | -2.8791690 | -2.9882340 |
| H | 4.4146990  | -1.8103840 | 0.3400910  | H | -0.1865010 | -3.8011940 | -1.7670260 |
| H | 4.1464730  | 0.8599330  | 0.0359340  | H | 1.2104870  | -2.2920490 | -3.3479090 |
| H | 4.5064410  | 0.0647350  | -1.5135560 | H | 1.5508800  | -2.1382350 | -1.6024680 |
| H | 3.4519520  | 2.2342440  | -1.9700420 |   |            |            |            |
| H | 2.3512000  | 0.9010680  | -2.4464130 |   |            |            |            |
| O | 0.5513480  | -0.5904780 | -2.3525800 |   |            |            |            |

**Table S133.** Geometric coordinates and single point energies for sodium cation solvated by 1 equivalent of 18-crown-6.

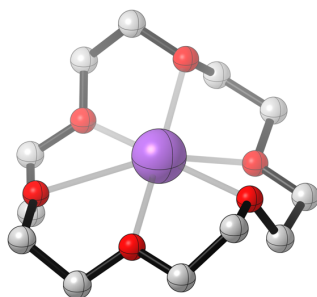

G = -1083.697944 Hartrees

G<sub>SP</sub> = -1084.800035 Hartrees

| Atom | X          | Y          | Z          | Atom | X          | Y          | Z          |
|------|------------|------------|------------|------|------------|------------|------------|
| C    | -3.3980640 | -0.5188200 | 0.3049100  | H    | -1.7360760 | -1.8436290 | -1.4749280 |
| O    | -2.4353790 | 0.5087880  | 0.2649620  | H    | -0.0526890 | -3.6281810 | -1.9033980 |
| C    | -2.8816100 | 1.7005360  | -0.3468610 | H    | 0.0659130  | -3.9279170 | -0.1399430 |
| C    | -2.0568750 | 2.8344240  | 0.2259530  | H    | 2.5267210  | -3.0677170 | -1.3954740 |
| O    | -0.6800440 | 2.5599140  | 0.1538030  | H    | 2.1105220  | -3.2404390 | 0.3398290  |
| C    | -0.0711920 | 2.7634000  | -1.0964430 | H    | 2.9520360  | -0.6512940 | -1.0556640 |
| C    | 1.4172540  | 2.7795940  | -0.8466450 | H    | 3.9829090  | -1.6433970 | 0.0262040  |
| O    | 1.7376560  | 1.5825340  | -0.1765190 | H    | 4.1032420  | 0.1696900  | 1.6579870  |
| C    | 3.0450040  | 1.5334700  | 0.3475140  | H    | 2.5444110  | 0.7553800  | 2.2976970  |
| C    | 3.0635490  | 0.4240080  | 1.3880970  | H    | 3.7747510  | 1.3581630  | -0.4629510 |
| O    | 2.3641550  | -0.7123740 | 0.9346050  | H    | 3.3106940  | 2.4893990  | 0.8303390  |
| C    | 2.9444870  | -1.3368510 | -0.1898240 | H    | 1.9740920  | 2.8688330  | -1.7955950 |
| C    | 2.1099180  | -2.5446860 | -0.5174120 | H    | 1.6674220  | 3.6429720  | -0.2064820 |
| O    | 0.7938280  | -2.1032670 | -0.7692540 | H    | -0.3311490 | 1.9557510  | -1.8097530 |
| C    | -0.1296320 | -3.1592830 | -0.9073330 | H    | -0.3851040 | 3.7222470  | -1.5450820 |
| C    | -1.5075030 | -2.5906320 | -0.6913550 | H    | -2.2904090 | 2.9433460  | 1.2935500  |
| O    | -1.5109930 | -1.9971140 | 0.5883860  | H    | -2.3019480 | 3.7828490  | -0.2832780 |
| C    | -2.7879770 | -1.6654890 | 1.0836630  | H    | -2.7815720 | 1.6250190  | -1.4455500 |
| H    | -3.4585720 | -2.5419300 | 1.0641140  | H    | -3.9466590 | 1.8813720  | -0.1224840 |

|    |            |            |            |   |            |            |            |
|----|------------|------------|------------|---|------------|------------|------------|
| H  | -2.6414910 | -1.3649230 | 2.1298380  | H | -4.3172150 | -0.1775640 | 0.8125830  |
| Na | 0.0483890  | -0.0831060 | 0.3789820  | H | -3.6796380 | -0.8241630 | -0.7198720 |
| H  | -2.2604120 | -3.3955940 | -0.7539370 |   |            |            |            |

**Table S134.** Geometric coordinates and single point energies for NaHMDS 18-crown-6 monosolvated monomer. The green bond indicates a longer than average N–Na contact.

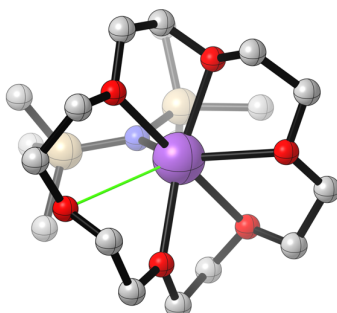

G = -1956.382789 Hartrees

G<sub>SP</sub> = -1958.034129 Hartrees

| Atom | X          | Y          | Z          | Atom | X          | Y          | Z          |
|------|------------|------------|------------|------|------------|------------|------------|
| C    | -1.1021370 | -0.9121900 | -3.1293960 | H    | 0.8769430  | -0.4887930 | -2.3887680 |
| C    | -2.8134350 | -1.9367570 | -1.8560050 | H    | -1.1615970 | 2.2705770  | -3.6994680 |
| O    | -1.6695000 | -1.1185430 | -1.8589230 | H    | -2.2619320 | 1.4015330  | -2.5781760 |
| Na   | -0.4722300 | 0.4037310  | 0.0127110  | H    | -2.1667720 | 3.8350140  | -2.0433060 |
| O    | -0.0691840 | 1.9905340  | 1.7483200  | H    | -0.3888480 | 3.7086210  | -1.8386310 |
| C    | 0.1765980  | 1.1388320  | 2.8409160  | H    | -1.9141510 | 4.4745000  | 0.5976850  |
| C    | -1.0764080 | 0.3811430  | 3.2528290  | H    | -0.1785200 | 4.1035340  | 0.3090770  |
| O    | -1.7298370 | -0.0382570 | 2.0800330  | H    | -2.0454470 | 2.4964030  | 2.1225610  |
| C    | -2.9124710 | -0.7531090 | 2.3197460  | H    | -0.8224330 | 3.6880560  | 2.6796730  |
| H    | -3.6729820 | -0.0995460 | 2.7881660  | N    | 1.6569640  | -0.4202900 | 0.1605270  |
| H    | -2.7135930 | -1.6035630 | 2.9969060  | Si   | 2.9236970  | 0.6418650  | -0.2167070 |
| C    | -3.4166640 | -1.2827660 | 1.0009050  | C    | 3.7727790  | 0.2752140  | -1.8870120 |
| O    | -2.4666210 | -2.1969290 | 0.5418580  | H    | 3.0768400  | 0.4313380  | -2.7274660 |
| C    | -2.7665580 | -2.8613310 | -0.6497860 | H    | 4.6469240  | 0.9251560  | -2.0539640 |
| H    | -1.9623750 | -3.5964020 | -0.7883670 | H    | 4.1166370  | -0.7710980 | -1.9295350 |
| H    | -3.7297410 | -3.4040940 | -0.5745240 | C    | 2.3226930  | 2.4431500  | -0.3505530 |
| H    | -3.5449770 | -0.4365300 | 0.2974690  | H    | 1.4641760  | 2.4985770  | -1.0387730 |
| H    | -4.4038110 | -1.7644900 | 1.1430710  | H    | 3.1226470  | 3.0964960  | -0.7340420 |

|   |            |            |            |    |            |            |            |
|---|------------|------------|------------|----|------------|------------|------------|
| H | -1.7622320 | 1.0129330  | 3.8512500  | H  | 2.0020790  | 2.8148520  | 0.6339160  |
| H | -0.7921990 | -0.4880830 | 3.8729720  | C  | 4.3312570  | 0.6894600  | 1.0647930  |
| H | 0.5733370  | 1.7000470  | 3.7067540  | H  | 5.0536800  | 1.4903270  | 0.8383220  |
| H | 0.9411710  | 0.4376900  | 2.4708260  | H  | 3.9247110  | 0.8729380  | 2.0728320  |
| C | -1.0697260 | 2.9590200  | 1.8851640  | H  | 4.8810070  | -0.2634550 | 1.0956320  |
| C | -1.1626630 | 3.6647460  | 0.5523830  | Si | 1.7397850  | -2.0818640 | 0.4775010  |
| O | -1.5079590 | 2.7100020  | -0.4239170 | C  | 0.6641910  | -2.5553110 | 1.9764380  |
| C | -1.3431470 | 3.1598350  | -1.7458970 | H  | -0.3782660 | -2.2350260 | 1.8199220  |
| C | -1.3033550 | 1.9494050  | -2.6503850 | H  | 0.6644200  | -3.6421680 | 2.1581480  |
| O | -0.2368140 | 1.1569530  | -2.2082330 | H  | 1.0554740  | -2.0641210 | 2.8838690  |
| C | 0.0855460  | 0.0145060  | -2.9657080 | C  | 1.0839620  | -3.1138940 | -0.9890870 |
| H | 0.4758800  | 0.2967550  | -3.9608860 | H  | 0.0856530  | -2.7429010 | -1.2705940 |
| H | -3.7227680 | -1.3068660 | -1.8554160 | H  | 1.7484770  | -2.9938210 | -1.8614790 |
| H | -2.8547360 | -2.5636980 | -2.7636560 | H  | 1.0100000  | -4.1897490 | -0.7615580 |
| H | -0.7528880 | -1.8677820 | -3.5618430 | C  | 3.4679620  | -2.7817840 | 0.8561540  |
| H | -1.8574020 | -0.4870950 | -3.8188660 | H  | 4.1796070  | -2.5595810 | 0.0445710  |
| H | 3.8740840  | -2.3486780 | 1.7836960  | H  | 3.4297350  | -3.8759330 | 0.9812900  |

**Table S135.** Geometric coordinates and single point energies for NaHMDS TDA-1 monosolvated monomer. The green bond indicates a longer than average N–Na contact.

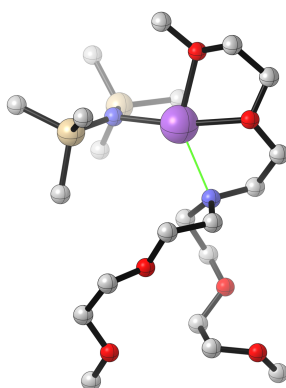

G = -2130.496217 Hartrees

G<sub>SP</sub> = -2132.352323 Hartrees

| Atom | X          | Y          | Z          | Atom | X          | Y          | Z          |
|------|------------|------------|------------|------|------------|------------|------------|
| C    | -4.8880460 | -1.0029350 | -1.3026870 | H    | 5.5328780  | 4.1404870  | -0.3068200 |
| O    | -3.8592920 | -1.8799810 | -0.8963590 | H    | 6.2436580  | 2.6672430  | 0.4209410  |
| C    | -3.7182930 | -3.0316350 | -1.6805470 | H    | 4.7146760  | 3.3396720  | 1.0703190  |
| C    | -2.6549150 | -3.8991860 | -1.0396690 | H    | 2.7509170  | 3.1131640  | -0.2994830 |
| O    | -1.5282680 | -3.0894180 | -0.8089870 | H    | 3.5544180  | 3.7882050  | -1.7479530 |
| C    | -0.3995610 | -3.7282610 | -0.2539670 | H    | 1.7774420  | 2.3144050  | -2.4537180 |
| C    | 0.3300620  | -2.7501460 | 0.6600020  | H    | 3.3415510  | 1.5306910  | -2.8544780 |
| N    | 0.5013890  | -1.4220300 | 0.0817560  | H    | 0.5028610  | 0.3102720  | -2.0572250 |
| C    | 0.8435710  | -0.4212320 | 1.1051620  | H    | 1.9099840  | -0.4179400 | -2.8726860 |
| C    | 1.9691450  | -0.8286560 | 2.0538690  | H    | 0.9076260  | -2.1850200 | -1.8016150 |
| O    | 3.1131350  | -1.2500250 | 1.3569840  | H    | 2.3769280  | -1.8311260 | -0.8553630 |
| C    | 4.0880210  | -0.2551680 | 1.1524600  | H    | 1.2978350  | -3.2065440 | 0.9505500  |
| C    | 4.9859280  | -0.6679810 | -0.0045530 | H    | -0.2680760 | -2.6342770 | 1.5796410  |
| O    | 5.3640350  | -2.0165470 | 0.0164620  | H    | 0.2512150  | -4.1041020 | -1.0622910 |
| C    | 6.0070260  | -2.4168890 | 1.1889890  | H    | -0.7086460 | -4.5989900 | 0.3495390  |
| H    | 5.3170170  | -2.4321520 | 2.0508870  | Na   | -1.8679910 | -0.8944330 | -0.2796990 |
| H    | 6.3890100  | -3.4337700 | 1.0302020  | N    | -2.5607000 | 1.1301010  | 0.3112240  |



|   |            |            |            |    |            |            |            |
|---|------------|------------|------------|----|------------|------------|------------|
| H | 6.8632460  | -1.7577390 | 1.4328730  | Si | -3.0910260 | 1.1064410  | 1.9133780  |
| H | 5.8716770  | -0.0018400 | -0.0124050 | C  | -4.8757840 | 1.7047660  | 2.1611460  |
| H | 4.4425420  | -0.5042110 | -0.9436890 | H  | -5.5765900 | 1.1000100  | 1.5637820  |
| H | 3.6333170  | 0.7114800  | 0.8800810  | H  | -5.1903500 | 1.6485580  | 3.2153740  |
| H | 4.6701280  | -0.1147230 | 2.0853090  | H  | -4.9772590 | 2.7506270  | 1.8310220  |
| H | 2.1949840  | 0.0129950  | 2.7338700  | C  | -3.0567320 | -0.7057050 | 2.5244460  |
| H | 1.6482610  | -1.6694660 | 2.6890380  | H  | -3.4687810 | -0.8149990 | 3.5395340  |
| H | 1.1006050  | 0.5130690  | 0.5935420  | H  | -3.6524550 | -1.3460630 | 1.8508350  |
| H | -0.0596920 | -0.2079290 | 1.7042960  | H  | -2.0257470 | -1.1021460 | 2.5545490  |
| C | 1.3630780  | -1.4657650 | -1.1026640 | C  | -2.0236860 | 2.1101470  | 3.1249180  |
| C | 1.4880210  | -0.1686740 | -1.8800080 | H  | -0.9682110 | 1.7977500  | 3.0735350  |
| O | 2.3368040  | 0.7426850  | -1.2296470 | H  | -2.0608950 | 3.1803340  | 2.8634810  |
| C | 2.6826160  | 1.8472650  | -2.0232060 | H  | -2.3626750 | 2.0068120  | 4.1679650  |
| C | 3.3955890  | 2.8601940  | -1.1645480 | Si | -2.1761150 | 2.3548630  | -0.7808140 |
| O | 4.6183710  | 2.3265190  | -0.7393200 | C  | -3.3186710 | 3.8691190  | -0.7398760 |
| C | 5.3014630  | 3.1605460  | 0.1499240  | H  | -3.0606730 | 4.6077410  | -1.5152980 |
| H | -2.4116070 | -4.7453540 | -1.7067260 | H  | -4.3672220 | 3.5663010  | -0.8882700 |
| H | -3.0246200 | -4.3042680 | -0.0800730 | H  | -3.2546880 | 4.3719920  | 0.2387890  |
| H | -3.4182210 | -2.7573320 | -2.7103640 | C  | -2.2753050 | 1.6608610  | -2.5570700 |
| H | -4.6667120 | -3.5966500 | -1.7411750 | H  | -3.3252220 | 1.4482620  | -2.8151560 |
| H | -4.8024700 | -0.7751550 | -2.3793160 | H  | -1.8811470 | 2.3607710  | -3.3110130 |
| H | -4.7541550 | -0.0756880 | -0.7287420 | H  | -1.7143610 | 0.7149760  | -2.6641580 |
| H | -5.8790950 | -1.4458420 | -1.1057810 | C  | -0.4036140 | 3.0233970  | -0.5658430 |
| H | 0.3272440  | 2.2014090  | -0.6414360 | H  | -0.2910080 | 3.4672800  | 0.4368420  |
| H | -0.1441570 | 3.7926000  | -1.3123680 |    |            |            |            |

**Table S136.** Geometric coordinates and single point energies for sodium cation solvated by 1 equivalent of TDA-1.

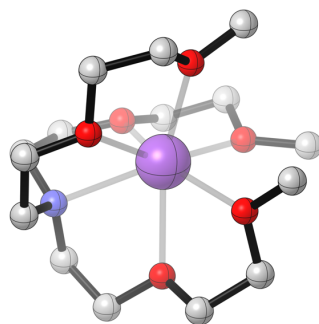

G = -1257.851318 Hartrees

G<sub>SP</sub> = -1259.147573 Hartrees

| Atom | X          | Y          | Z          | Atom | X          | Y          | Z          |
|------|------------|------------|------------|------|------------|------------|------------|
| C    | -2.8895110 | 1.1531010  | -1.7745950 | H    | -2.9568960 | -0.1130920 | 1.8347390  |
| O    | -1.6307010 | 0.5260590  | -1.8254570 | H    | -3.6954200 | 1.4327330  | 1.3145260  |
| C    | -1.4112620 | -0.2123280 | -3.0066650 | H    | -1.8225680 | -1.9103430 | 2.5213640  |
| C    | 0.0724640  | -0.2781450 | -3.2739620 | H    | -1.9005150 | -3.4935070 | 1.6948180  |
| O    | 0.7180580  | -0.7524720 | -2.1186320 | H    | 0.4543970  | -3.4220870 | 1.1178080  |
| C    | 2.1040510  | -0.9368320 | -2.2842740 | H    | 0.2688440  | -3.1237680 | 2.8737230  |
| C    | 2.7407860  | -1.0763630 | -0.9130420 | H    | 2.5332790  | -2.4311520 | 1.4909280  |
| N    | 2.3614320  | -0.0061320 | -0.0022550 | H    | 2.3159770  | -1.5734350 | 3.0275370  |
| C    | 2.7453630  | -0.2620430 | 1.3782930  | H    | 3.8458960  | -0.3320760 | 1.5083070  |
| C    | 2.1080370  | -1.5183770 | 1.9444310  | H    | 2.3980660  | 0.5810690  | 1.9915330  |
| O    | 0.7212350  | -1.4656300 | 1.7061940  | H    | 3.8409610  | -1.1593380 | -1.0381620 |
| C    | 0.0765980  | -2.7043560 | 1.8700300  | H    | 2.3884810  | -2.0270020 | -0.4892830 |
| C    | -1.4081640 | -2.5059460 | 1.6870700  | H    | 2.5316760  | -0.0893130 | -2.8486810 |
| O    | -1.6331390 | -1.8454330 | 0.4619330  | H    | 2.3089430  | -1.8482810 | -2.8730970 |
| C    | -2.9002760 | -2.1004920 | -0.0944620 | H    | 0.4533710  | 0.7295180  | -3.5254440 |
| H    | -2.9867310 | -1.4925450 | -1.0017600 | H    | 0.2598890  | -0.9426150 | -4.1363340 |
| H    | -3.0093790 | -3.1654930 | -0.3583540 | H    | -1.9043940 | 0.2712770  | -3.8672050 |
| H    | -3.7129320 | -1.8258440 | 0.6004490  | H    | -1.8284490 | -1.2306790 | -2.9003530 |

|    |            |           |            |   |            |           |            |
|----|------------|-----------|------------|---|------------|-----------|------------|
| Na | -0.1705470 | 0.0017840 | 0.0023340  | H | -2.9839910 | 1.9157110 | -2.5653090 |
| O  | -1.6141060 | 1.3305020 | 1.3742710  | H | -2.9742560 | 1.6359310 | -0.7947830 |
| C  | -1.3921980 | 2.7219070 | 1.3182330  | H | -3.7120200 | 0.4256140 | -1.8882320 |
| C  | 0.0923670  | 2.9828120 | 1.3901970  | H | 2.5466820  | 2.4991970 | 1.3487650  |
| O  | 0.7338060  | 2.2136730 | 0.4035280  | H | 0.2829120  | 4.0607500 | 1.2416980  |
| C  | 2.1219670  | 2.4376690 | 0.3311170  | H | 0.4741670  | 2.6991850 | 2.3889680  |
| C  | 2.7524850  | 1.3146650 | -0.4726840 | H | -1.8110650 | 3.1358570 | 0.3825480  |
| H  | 2.4048240  | 1.4252420 | -1.5091280 | H | -1.8819750 | 3.2303010 | 2.1663670  |
| H  | 3.8538580  | 1.4557970 | -0.4781820 | C | -2.8733580 | 0.9776650 | 1.8940710  |
| H  | 2.3365390  | 3.4015360 | -0.1631600 | H | -2.9694960 | 1.2929570 | 2.9462520  |

**Table S137.** Geometric coordinates and single point energies for sodium cation solvated by 1 equivalent of [2.2.2]cryptand.

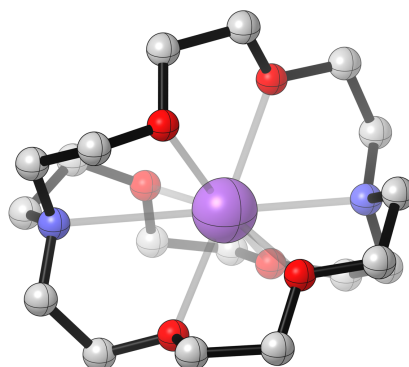

G = -1428.485745 Hartrees

G<sub>SP</sub> = -1429.964928 Hartrees

| Atom | X          | Y          | Z          | Atom | X          | Y          | Z          |
|------|------------|------------|------------|------|------------|------------|------------|
| C    | -3.2924790 | -1.2929850 | 0.5449090  | C    | 3.0932620  | 0.1208850  | 1.4033430  |
| N    | -2.9114100 | 0.0001320  | -0.0015840 | H    | 4.1923300  | 0.1740010  | 1.5554870  |
| C    | -3.2892740 | 0.1733900  | -1.3955930 | H    | 2.6595880  | 1.0534360  | 1.7916150  |
| C    | -2.2845240 | 1.0366380  | -2.1440180 | H    | 3.0662790  | -1.9636170 | 2.0394620  |
| O    | -0.9950330 | 0.4667000  | -2.1642950 | H    | 2.6966290  | -0.7859840 | 3.3151280  |
| C    | -0.8424770 | -0.5982420 | -3.0727850 | H    | 1.1159330  | -3.2086670 | 1.8423480  |
| C    | 0.6302920  | -0.8685280 | -3.2429870 | H    | 0.7620030  | -2.5254050 | 3.4604830  |
| O    | 1.1751870  | -1.1221400 | -1.9739500 | H    | -1.2925020 | -3.3357250 | 2.3229970  |
| C    | 2.5464480  | -1.4376250 | -1.9974400 | H    | -1.3465810 | -1.5797990 | 2.6574880  |
| C    | 3.0956300  | -1.2740930 | -0.5922560 | H    | -1.3426350 | 3.0942280  | 0.0368820  |
| N    | 2.7236130  | -0.0002880 | 0.0022460  | H    | -1.2898490 | 3.6814090  | 1.7252670  |
| C    | 3.0963730  | 1.1520640  | -0.8023810 | H    | 1.1174510  | 3.1982730  | 1.8583890  |
| C    | 2.5447710  | 2.4498800  | -0.2418430 | H    | 0.7671010  | 4.2595640  | 0.4578510  |
| O    | 1.1732770  | 2.2701710  | 0.0171810  | H    | 3.0682400  | 2.7450560  | 0.6848790  |
| C    | 0.6258610  | 3.2436630  | 0.8683720  | H    | 2.7030230  | 3.2615990  | -0.9734230 |
| C    | -0.8469740 | 2.9605010  | 1.0152090  | H    | 4.1958020  | 1.2558960  | -0.9224620 |
| O    | -0.9994290 | 1.6422330  | 1.4858120  | H    | 2.6644960  | 1.0226410  | -1.8049230 |

|    |            |            |            |   |            |            |            |
|----|------------|------------|------------|---|------------|------------|------------|
| C  | -2.2896430 | 1.3399220  | 1.9675660  | H | 2.6614420  | -2.0765840 | 0.0209690  |
| C  | -3.2921200 | 1.1207410  | 0.8442510  | H | 4.1948870  | -1.4316260 | -0.6199160 |
| H  | -4.3053910 | 0.9935750  | 1.2763130  | H | 2.7043190  | -2.4773310 | -2.3339320 |
| H  | -3.3403900 | 2.0319950  | 0.2287520  | H | 3.0718470  | -0.7834540 | -2.7157320 |
| H  | -2.1856470 | 0.4276650  | 2.5724000  | H | 0.7714850  | -1.7307790 | -3.9191030 |
| H  | -2.6426580 | 2.1425360  | 2.6394080  | H | 1.1237490  | 0.0118070  | -3.6961930 |
| Na | 0.1601250  | -0.0006770 | -0.0012520 | H | -1.3398990 | -1.5125320 | -2.7021810 |
| O  | -0.9999830 | -2.1097490 | 0.6764830  | H | -1.2835460 | -0.3409710 | -4.0522310 |
| C  | -2.2897890 | -2.3750290 | 0.1726090  | H | -2.6357010 | 1.2201340  | -3.1751330 |
| H  | -2.6432290 | -3.3586090 | 0.5302050  | H | -2.1795530 | 2.0151810  | -1.6538080 |
| H  | -2.1847330 | -2.4411490 | -0.9198180 | H | -3.3372680 | -0.8148120 | -1.8779210 |
| C  | -0.8495270 | -2.3603570 | 2.0538160  | H | -4.3019780 | 0.6120160  | -1.5034060 |
| C  | 0.6227980  | -2.3738460 | 2.3750380  | H | -4.3054980 | -1.6035700 | 0.2179020  |
| O  | 1.1705280  | -1.1500330 | 1.9577710  | H | -3.3412630 | -1.2163100 | 1.6418510  |
| C  | 2.5411280  | -1.0141490 | 2.2460600  |   |            |            |            |

**Table S138.** Geometric coordinates and single point energies for sodium cation solvated by 1 equivalent PMDTA and 1 equivalent of HMPA.

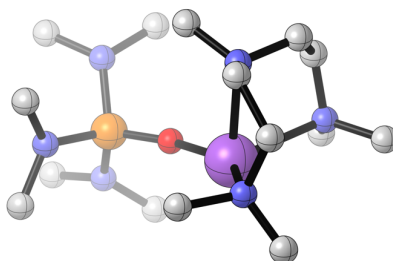

G -1501.622245 Hartrees

G<sub>SP</sub> = -1502.946949 Hartrees

| Atom | X          | Y          | Z          | Atom | X         | Y          | Z          |
|------|------------|------------|------------|------|-----------|------------|------------|
| N    | -2.1614640 | 0.0854770  | 1.4840440  | H    | 3.7623100 | -0.3856090 | 3.0876740  |
| C    | -2.7946910 | -1.2298480 | 1.6083970  | H    | 4.7134150 | -1.0539380 | 1.7362330  |
| C    | -2.0516540 | -2.3280640 | 0.8554300  | C    | 2.1388690 | -1.9526450 | 1.6206320  |
| N    | -2.0895280 | -2.1758450 | -0.6003240 | H    | 2.8478560 | -2.7543990 | 1.3478810  |
| C    | -1.0725130 | -3.0193130 | -1.2221440 | H    | 1.9352420 | -2.0323610 | 2.7000450  |
| H    | -1.1146120 | -2.9081500 | -2.3148710 | H    | 1.2020990 | -2.1094540 | 1.0731310  |
| H    | -0.0753950 | -2.7047970 | -0.8826210 | N    | 3.2287430 | -0.3401070 | -1.4110870 |
| H    | -1.2182000 | -4.0905560 | -0.9811530 | C    | 2.7750340 | -1.2315330 | -2.4657060 |
| C    | -3.4056950 | -2.4883500 | -1.1438640 | H    | 3.1611040 | -2.2562410 | -2.3264270 |
| H    | -4.1729700 | -1.8222610 | -0.7267110 | H    | 1.6805630 | -1.2646600 | -2.4781950 |
| H    | -3.3997530 | -2.3519630 | -2.2339700 | H    | 3.1298370 | -0.8644130 | -3.4414830 |
| H    | -3.7032060 | -3.5337100 | -0.9283940 | C    | 4.6713250 | -0.1914530 | -1.3140600 |
| Na   | -1.2805970 | 0.0728810  | -0.7434500 | H    | 5.1662420 | -1.1405180 | -1.0437780 |
| N    | -3.0579290 | 1.7138970  | -0.8633140 | H    | 5.0783570 | 0.1403680  | -2.2821560 |
| C    | -3.9009310 | 1.4098260  | 0.2953180  | H    | 4.9301640 | 0.5663280  | -0.5629630 |
| C    | -3.1272460 | 1.1780450  | 1.5892410  | N    | 2.5926550 | 1.6855980  | 0.1300200  |
| H    | -3.8546800 | 1.0041050  | 2.4065850  | C    | 2.8416810 | 2.6067070  | -0.9694000 |
| H    | -2.5832580 | 2.0930910  | 1.8645130  | H    | 3.6497510 | 3.3024210  | -0.6956030 |
| H    | -4.4872820 | 0.5102720  | 0.0488930  | H    | 3.1405140 | 2.0575290  | -1.8688350 |

|   |            |            |            |   |            |            |            |
|---|------------|------------|------------|---|------------|------------|------------|
| H | -4.6366310 | 2.2230100  | 0.4666260  | H | 1.9435250  | 3.2041510  | -1.2038630 |
| C | -3.8684760 | 1.7333410  | -2.0770630 | C | 2.1654060  | 2.3452520  | 1.3544890  |
| H | -4.3591120 | 0.7597670  | -2.2158650 | H | 1.9676760  | 1.6060840  | 2.1395020  |
| H | -3.8265350 | -1.1648750 | 1.2349230  | H | 2.9525460  | 3.0299550  | 1.7074640  |
| H | -4.6531910 | 2.5137970  | -2.0393050 | H | 1.2501920  | 2.9413370  | 1.1890920  |
| H | -3.2332060 | 1.9299970  | -2.9516840 | H | -0.9947390 | -2.3186180 | 1.1642420  |
| C | -2.3539890 | 2.9818120  | -0.7038870 | H | -2.4604780 | -3.3144390 | 1.1568200  |
| H | -1.6416730 | 2.9332540  | 0.1325340  | H | -2.8759140 | -1.5209150 | 2.6743800  |
| H | -1.7861260 | 3.2061990  | -1.6176000 | C | -1.0580910 | 0.2349380  | 2.4242500  |
| H | -3.0489180 | 3.8243640  | -0.5168640 | H | -0.3000730 | -0.5415180 | 2.2497310  |
| O | 0.8180210  | -0.3008800 | -0.4753890 | H | -0.5680910 | 1.2065310  | 2.2698740  |
| P | 2.2416420  | 0.0798960  | -0.1378970 | H | -1.3936390 | 0.1737420  | 3.4782380  |
| N | 2.6684660  | -0.6330480 | 1.3151850  |   |            |            |            |
| C | 3.9182680  | -0.3343670 | 1.9987370  |   |            |            |            |
| H | 4.2636630  | 0.6761070  | 1.7495930  |   |            |            |            |

**Table S139.** Geometric coordinates and single point energies for sodium cation solvated by 1 equivalent PMDTA and 2 equivalents of HMPA.

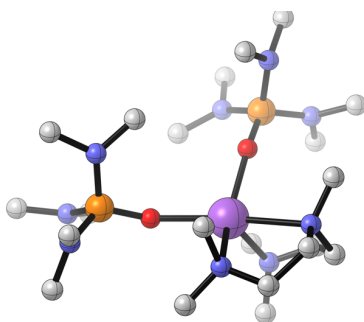

G = -2321.057699 Hartrees

G<sub>SP</sub> = -2323.071221 Hartrees

| Atom | X          | Y          | Z          | Atom | X          | Y          | Z          |
|------|------------|------------|------------|------|------------|------------|------------|
| Na   | -0.0344970 | 1.1819260  | 0.1109100  | C    | -2.4418910 | -2.2456260 | 2.4213540  |
| N    | 1.4855140  | 2.9892840  | -0.7649960 | H    | -2.0010160 | -3.2495910 | 2.2866960  |
| C    | 2.0648820  | 3.5117230  | 0.4725100  | H    | -1.6411700 | -1.4983680 | 2.4222920  |
| C    | 2.2723680  | 2.4435290  | 1.5426820  | H    | -2.9433220 | -2.2260590 | 3.4021900  |
| N    | 1.0268570  | 1.9396050  | 2.1150960  | C    | -4.5700770 | -2.7919650 | 1.3520460  |
| C    | 1.2609150  | 0.7250180  | 2.8800750  | H    | -4.3114880 | -3.8355780 | 1.1014330  |
| H    | 0.3085500  | 0.3517890  | 3.2829510  | H    | -5.0536140 | -2.7919100 | 2.3422960  |
| H    | 1.6827470  | -0.0497000 | 2.2242090  | H    | -5.3017310 | -2.4269720 | 0.6206290  |
| H    | 1.9551290  | 0.8903190  | 3.7301280  | N    | -4.4397390 | -0.1363420 | -0.1898050 |
| C    | 0.3380150  | 2.9278110  | 2.9299690  | C    | -5.2672070 | 0.3573700  | 0.9016440  |
| H    | 0.0711590  | 3.8128420  | 2.3376080  | H    | -6.3131380 | 0.0391680  | 0.7608720  |
| H    | -0.5949240 | 2.4960000  | 3.3174850  | H    | -4.9087020 | -0.0306960 | 1.8617410  |
| H    | 0.9529910  | 3.2595850  | 3.7914560  | H    | -5.2499180 | 1.4597640  | 0.9400710  |
| H    | 2.7943040  | 1.5837920  | 1.0897480  | C    | -4.8211630 | 0.3964110  | -1.4875840 |
| H    | 2.9341370  | 2.8510950  | 2.3373130  | H    | -4.1686060 | 0.0042620  | -2.2754040 |
| H    | 1.4115320  | 4.3023820  | 0.8674240  | H    | -5.8608850 | 0.1123980  | -1.7188900 |
| H    | -2.4655430 | 3.5778310  | 0.9727870  | H    | -4.7611030 | 1.4986940  | -1.4977620 |
| C    | -2.6775870 | 3.1191940  | -0.0036520 | O    | 1.5115510  | -0.3020180 | -0.3851970 |



|   |            |            |            |   |            |            |            |
|---|------------|------------|------------|---|------------|------------|------------|
| N | -1.4414010 | 2.9362960  | -0.7424710 | P | 2.6294860  | -1.3015890 | -0.2535380 |
| C | -0.6994930 | 4.1809720  | -0.8812380 | N | 2.1443530  | -2.5189060 | 0.7814550  |
| C | 0.6930110  | 3.9894780  | -1.4747900 | C | 2.9871600  | -3.6643670 | 1.0722870  |
| H | 1.2036970  | 4.9733810  | -1.5060150 | H | 4.0375500  | -3.4400490 | 0.8464750  |
| H | 0.6028210  | 3.6690900  | -2.5229170 | H | 2.9196980  | -3.9186890 | 2.1426100  |
| H | -0.6207790 | 4.6308990  | 0.1217430  | H | 2.6860550  | -4.5540980 | 0.4924120  |
| H | -1.2479340 | 4.9159840  | -1.5089470 | C | 0.7561250  | -2.6682110 | 1.1802640  |
| C | -1.6848620 | 2.2677800  | -2.0086360 | H | 0.2923700  | -3.5499030 | 0.7018600  |
| H | -0.7371710 | 2.0091190  | -2.5046700 | H | 0.6941060  | -2.8070170 | 2.2731100  |
| H | -2.2245120 | 1.3285470  | -1.8182330 | H | 0.1797550  | -1.7748880 | 0.9060530  |
| H | -2.2851770 | 2.8834620  | -2.7106390 | N | 3.0727300  | -1.8183250 | -1.7795850 |
| H | -3.4002880 | 3.7678280  | -0.5415230 | C | 2.1299520  | -1.7203870 | -2.8811900 |
| H | -3.1355800 | 2.1354670  | 0.1726220  | H | 1.5901230  | -2.6696640 | -3.0503560 |
| H | 3.0383830  | 4.0014370  | 0.2666080  | H | 1.4031880  | -0.9270400 | -2.6748370 |
| C | 2.5170300  | 2.4230600  | -1.6200420 | H | 2.6719370  | -1.4700620 | -3.8064580 |
| H | 3.0719710  | 1.6534820  | -1.0703620 | C | 4.1549690  | -2.7624650 | -1.9967820 |
| H | 2.0595480  | 1.9306190  | -2.4900540 | H | 3.7912270  | -3.8022720 | -2.0746640 |
| H | 3.2295830  | 3.1930820  | -1.9797840 | H | 4.6777130  | -2.5157160 | -2.9342720 |
| O | -1.7821420 | -0.1179840 | 0.4951580  | H | 4.8848820  | -2.7070360 | -1.1793650 |
| P | -2.9971650 | -0.9208210 | 0.1115180  | N | 4.0904420  | -0.8182210 | 0.3960850  |
| N | -2.6990120 | -1.7051800 | -1.3365090 | C | 5.0662760  | -0.0696110 | -0.3819580 |
| C | -3.6726180 | -2.6074950 | -1.9261300 | H | 6.0661500  | -0.5212830 | -0.2742650 |
| H | -4.6886010 | -2.3491690 | -1.6016760 | H | 4.7936670  | -0.0707490 | -1.4434110 |
| H | -3.6386490 | -2.5260370 | -3.0243160 | H | 5.1292760  | 0.9762010  | -0.0341200 |
| H | -3.4754020 | -3.6604240 | -1.6574670 | C | 4.3763960  | -0.8230440 | 1.8221800  |
| C | -1.3417150 | -1.8989980 | -1.8168210 | H | 3.6250970  | -1.4041170 | 2.3678910  |
| H | -1.0059640 | -2.9415560 | -1.6676310 | H | 5.3669760  | -1.2711240 | 2.0035950  |
| H | -1.2932840 | -1.6834430 | -2.8973860 | H | 4.3883190  | 0.2028140  | 2.2299450  |
| H | -0.6441860 | -1.2345040 | -1.2912420 | N | -3.4005260 | -1.9324550 | 1.3772850  |

**Table S140** Geometric coordinates and single point energies for sodium cation solvated by 1 equivalent PMDTA and 1 equivalents of DMPU.

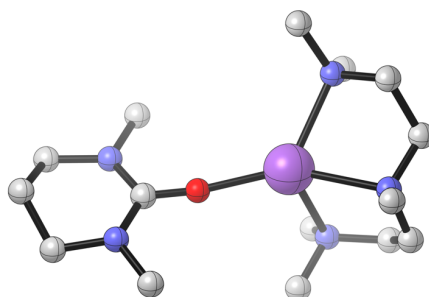

G = -1102.160998 Hartrees

G<sub>SP</sub> = -1103.265272 Hartrees

| Atom | X          | Y          | Z          | Atom | X          | Y          | Z          |
|------|------------|------------|------------|------|------------|------------|------------|
| Na   | -0.7805410 | 0.1293820  | -0.1738770 | C    | -2.9426230 | -0.8693030 | -2.4446980 |
| N    | -2.9543740 | -0.6196230 | -1.0060780 | H    | -2.6643000 | 0.0424090  | -2.9902370 |
| C    | -3.8578120 | 0.4872550  | -0.6772330 | H    | -2.2032880 | -1.6457410 | -2.6870990 |
| C    | -3.2675800 | 1.8669330  | -0.9450520 | H    | -3.9310420 | -1.2025340 | -2.8162450 |
| N    | -2.0578660 | 2.1562640  | -0.1736800 | O    | 1.3546310  | -0.0757460 | -0.0994600 |
| C    | -1.4295110 | 3.3815250  | -0.6566800 | C    | 2.5989670  | -0.0308480 | -0.1166940 |
| H    | -0.4991600 | 3.5688510  | -0.1031240 | N    | 3.2695430  | 0.9140330  | 0.5984580  |
| H    | -1.1839830 | 3.2830280  | -1.7227870 | C    | 4.7168570  | 1.0947540  | 0.5751620  |
| H    | -2.0896230 | 4.2618190  | -0.5320080 | C    | 5.3249020  | 0.4467720  | -0.6520730 |
| C    | -2.3355980 | 2.2603170  | 1.2548120  | C    | 4.7809560  | -0.9617760 | -0.7882410 |
| H    | -2.7031700 | 1.3036390  | 1.6535670  | N    | 3.3272500  | -0.9231640 | -0.8435470 |
| H    | -1.4111480 | 2.5137480  | 1.7931590  | C    | 2.6677230  | -2.0157790 | -1.5285400 |
| H    | -3.0888470 | 3.0415790  | 1.4783200  | H    | 2.8062110  | -2.9675660 | -0.9892170 |
| H    | -3.0138320 | 1.9623510  | -2.0117770 | H    | 1.5977350  | -1.8062040 | -1.6082420 |
| H    | -4.0515760 | 2.6257940  | -0.7429030 | H    | 3.0872270  | -2.1263320 | -2.5385760 |
| H    | -4.1376510 | 0.4113770  | 0.3824910  | H    | 5.1226070  | -1.5960670 | 0.0500390  |
| H    | -1.7724710 | -0.5032540 | 3.1932740  | H    | 5.1391990  | -1.4287530 | -1.7159850 |
| C    | -1.1707800 | -1.3364130 | 2.8032490  | H    | 5.0645630  | 1.0240000  | -1.5518320 |
| N    | -1.4661250 | -1.5508640 | 1.3922740  | H    | 6.4189720  | 0.4322160  | -0.5656760 |

|   |            |            |            |   |            |            |            |
|---|------------|------------|------------|---|------------|------------|------------|
| C | -2.8895700 | -1.8124710 | 1.1939040  | H | 5.1573830  | 0.6740710  | 1.4963330  |
| C | -3.3123130 | -1.8365320 | -0.2722020 | H | 4.9249380  | 2.1752260  | 0.5809070  |
| H | -4.4029410 | -2.0276530 | -0.3205290 | C | 2.5306610  | 1.8265870  | 1.4472950  |
| H | -2.8370500 | -2.6890060 | -0.7786590 | H | 1.5679820  | 1.3851490  | 1.7234690  |
| H | -3.4500810 | -1.0346770 | 1.7366700  | H | 3.1093720  | 2.0098430  | 2.3633590  |
| H | -3.1855630 | -2.7785880 | 1.6535730  | H | 2.3543610  | 2.7943060  | 0.9489980  |
| C | -0.6310380 | -2.6224980 | 0.8606470  | H | -1.3874840 | -2.2337050 | 3.4155780  |
| H | -0.7719140 | -2.7272080 | -0.2254440 | H | -0.1079290 | -1.0848400 | 2.9252610  |
| H | 0.4257720  | -2.3795230 | 1.0340900  | H | -4.8045340 | 0.3967450  | -1.2462430 |
| H | -0.8582730 | -3.5994010 | 1.3319100  |   |            |            |            |

**Table S141.** Geometric coordinates and single point energies for sodium cation solvated by 1 equivalent PMDTA and 2 equivalents of DMPU.

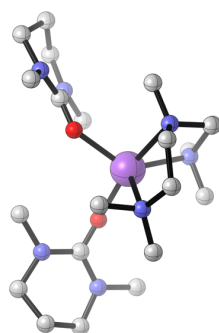

G = -1522.132993 Hartrees

G<sub>SP</sub> = -1523.706012 Hartrees

| Atom | X          | Y          | Z          | Atom | X          | Y         | Z          |
|------|------------|------------|------------|------|------------|-----------|------------|
| Na   | -0.0066320 | -0.6711770 | 0.1610860  | C    | -2.4516610 | 1.4451960 | -0.0424210 |
| N    | -1.4632240 | -2.2626150 | -1.0142490 | N    | -2.6897770 | 1.4866610 | 1.2994190  |
| C    | -1.3350280 | -3.5551710 | -0.3485440 | C    | -3.9224720 | 1.9816380 | 1.8991370  |
| C    | -1.3214000 | -3.4565780 | 1.1736850  | C    | -5.0621930 | 1.9183700 | 0.9011730  |
| N    | -0.2792500 | -2.5773250 | 1.6954340  | C    | -4.6249360 | 2.5624120 | -0.4001160 |
| C    | -0.4110410 | -2.4199650 | 3.1362400  | N    | -3.4116050 | 1.9247150 | -0.8853550 |
| H    | 0.3118870  | -1.6744980 | 3.4977650  | C    | -3.1459330 | 2.0269740 | -2.3059780 |
| H    | -1.4231020 | -2.0729900 | 3.3874320  | H    | -3.0799180 | 3.0824690 | -2.6162240 |
| H    | -0.2338140 | -3.3711080 | 3.6769310  | H    | -2.1974600 | 1.5324420 | -2.5341320 |
| C    | 1.0559610  | -3.0560380 | 1.3647210  | H    | -3.9545910 | 1.5481840 | -2.8786280 |
| H    | 1.2087220  | -3.0610120 | 0.2760690  | H    | -4.4664970 | 3.6482490 | -0.2652480 |
| H    | 1.8017570  | -2.3757370 | 1.7963160  | H    | -5.3993920 | 2.4418980 | -1.1709400 |
| H    | 1.2421870  | -4.0787830 | 1.7512840  | H    | -5.3352520 | 0.8688630 | 0.7122090  |
| H    | -2.2904130 | -3.0775640 | 1.5336460  | H    | -5.9457920 | 2.4291260 | 1.3053000  |
| H    | -1.2161400 | -4.4834840 | 1.5839800  | H    | -3.7808330 | 3.0162670 | 2.2590970  |
| H    | -0.4099390 | -4.0408230 | -0.6869470 | H    | -4.1513580 | 1.3608870 | 2.7775900  |
| H    | 2.8313040  | -2.5724250 | -1.2791050 | C    | -1.6344540 | 1.0298130 | 2.1859460  |
| C    | 2.6648720  | -1.6064880 | -1.7780860 | H    | -0.6493580 | 1.3663390 | 1.8360910  |

|   |            |            |            |   |            |            |            |
|---|------------|------------|------------|---|------------|------------|------------|
| N | 1.2423010  | -1.3149120 | -1.8498780 | H | -1.8101700 | 1.4451940  | 3.1857850  |
| C | 0.5214030  | -2.3833310 | -2.5333410 | H | -1.6171430 | -0.0711280 | 2.2680360  |
| C | -0.9970620 | -2.2940870 | -2.3981570 | O | 1.6780800  | 0.4981490  | 0.9946290  |
| H | -1.4462380 | -3.1366050 | -2.9637880 | C | 2.6966680  | 1.1147340  | 0.6482280  |
| H | -1.3515830 | -1.3738960 | -2.8863690 | N | 2.6176270  | 2.3051040  | -0.0204220 |
| H | 0.8797990  | -3.3417940 | -2.1257450 | C | 3.8029990  | 3.1087190  | -0.2741140 |
| H | 0.7686860  | -2.4033370 | -3.6161240 | C | 4.9582750  | 2.1998110  | -0.6458660 |
| C | 1.0250030  | -0.0140980 | -2.4711490 | C | 5.1929060  | 1.2135670  | 0.4805150  |
| H | -0.0292280 | 0.2853270  | -2.3951440 | N | 3.9382070  | 0.6135480  | 0.9178130  |
| H | 1.6186470  | 0.7431260  | -1.9371780 | C | 4.0434000  | -0.5875660 | 1.7221690  |
| H | 1.3282460  | -0.0085410 | -3.5381500 | H | 3.1910920  | -0.6514460 | 2.4068770  |
| H | 3.1342530  | -1.6552780 | -2.7816610 | H | 4.0714380  | -1.4985070 | 1.1000250  |
| H | 3.1742170  | -0.8246710 | -1.1943310 | H | 4.9693950  | -0.5396760 | 2.3107830  |
| H | -2.1602340 | -4.2358970 | -0.6433640 | H | 5.6824910  | 1.7122380  | 1.3357880  |
| C | -2.8262370 | -1.7602290 | -0.9194880 | H | 5.8639360  | 0.4055120  | 0.1507530  |
| H | -3.0933380 | -1.5731280 | 0.1320170  | H | 4.7087410  | 1.6631200  | -1.5743260 |
| H | -2.9075230 | -0.8041990 | -1.4515410 | H | 5.8698250  | 2.7833450  | -0.8289470 |
| H | -3.5634250 | -2.4711340 | -1.3443230 | H | 4.0601760  | 3.7240740  | 0.6081590  |
| O | -1.3910390 | 0.9671290  | -0.4748560 | H | 3.5711480  | 3.7995750  | -1.0960370 |
| H | 1.1224330  | 3.6114590  | 0.7273130  | C | 1.3279990  | 2.9599610  | -0.1397250 |
| H | 1.3302240  | 3.5809790  | -1.0458000 | H | 0.5263780  | 2.2176110  | -0.2236330 |

**Table S142.** Geometric coordinates and single point energies for unsolvated sodium cation.

G = -162.014812 Hartrees

G<sub>SP</sub> = -162.0655113 Hartrees

| <b>Atom</b> | <b>X</b>  | <b>Y</b>  | <b>Z</b>  | <b>Atom</b> | <b>X</b> | <b>Y</b> | <b>Z</b> |
|-------------|-----------|-----------|-----------|-------------|----------|----------|----------|
| Na          | 0.0000000 | 0.0000000 | 0.0000000 |             |          |          |          |

**Table S143.** Geometric coordinates and single point energies for NaTMDS toluene disolvated dimer.

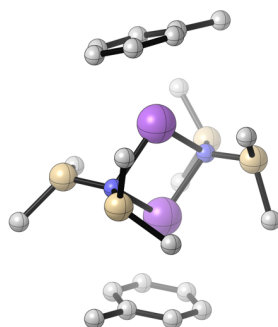

G = -2454.877614 Hartrees

G<sub>SP</sub> = -2456.478908 Hartrees

| Atom | X          | Y          | Z          | Atom | X          | Y          | Z          |
|------|------------|------------|------------|------|------------|------------|------------|
| Na   | 1.3560690  | 0.5695680  | -0.0151840 | H    | -3.1443990 | -1.5272450 | -2.7503130 |
| N    | 0.4661130  | -1.5899940 | -0.1468950 | H    | -3.9641470 | 0.7089840  | -2.0513070 |
| Na   | -1.5190960 | -0.3320020 | 0.0906210  | C    | -4.7266550 | 1.5179740  | 0.4464030  |
| N    | -0.6305460 | 1.8131210  | 0.2825150  | H    | -5.2813270 | 2.0500950  | -0.3382950 |
| Si   | -0.7919530 | 3.0782640  | -0.8637890 | H    | -5.3476690 | 1.4814810  | 1.3510020  |
| C    | 0.7552100  | 3.3023500  | -1.9382900 | H    | -3.8268420 | 2.1137600  | 0.6775920  |
| H    | 1.6224310  | 3.5909180  | -1.3265160 | H    | -4.6352160 | -0.7778600 | 1.9285190  |
| H    | 1.0019940  | 2.3756830  | -2.4824960 | H    | -3.8518550 | -3.0201220 | 1.2253820  |
| H    | 0.5947110  | 4.0924150  | -2.6880680 | Si   | 0.7206920  | -2.6576970 | 1.1672420  |
| C    | -2.2086530 | 2.8534910  | -2.1013510 | C    | 1.5790380  | -1.7789560 | 2.6079060  |
| H    | -2.0823840 | 1.9348280  | -2.6967510 | H    | 2.5728360  | -1.4149160 | 2.3074490  |
| H    | -3.1839550 | 2.8117660  | -1.5947800 | H    | 0.9940580  | -0.9135090 | 2.9589230  |
| H    | -2.2298620 | 3.7034580  | -2.8010740 | H    | 1.7150630  | -2.4572510 | 3.4640930  |
| H    | -1.0321080 | 4.4108810  | -0.2098290 | C    | -0.8727360 | -3.4141790 | 1.8612990  |
| Si   | -0.7481150 | 2.1054390  | 1.9642800  | H    | -1.4168330 | -3.9554560 | 1.0715470  |
| C    | -1.6183970 | 0.6544320  | 2.8348460  | H    | -0.6489460 | -4.1259700 | 2.6709840  |
| H    | -2.6744010 | 0.5920150  | 2.5271640  | H    | -1.5449320 | -2.6421930 | 2.2713210  |
| H    | -1.1378050 | -0.3181120 | 2.6291180  | H    | 1.5927550  | -3.8359000 | 0.8198760  |

|   |            |            |            |    |            |            |            |
|---|------------|------------|------------|----|------------|------------|------------|
| H | -1.6054080 | 0.7852510  | 3.9276070  | Si | 0.4316330  | -2.0839990 | -1.7842730 |
| C | 0.9458070  | 2.3045860  | 2.7965210  | C  | 0.3372270  | -0.5354840 | -2.8814360 |
| H | 1.4905380  | 3.1445850  | 2.3359820  | H  | -0.4699030 | 0.1507500  | -2.5705730 |
| H | 0.8516080  | 2.5098590  | 3.8740500  | H  | 0.1648880  | -0.7930570 | -3.9375100 |
| H | 1.5667930  | 1.3980760  | 2.6895680  | H  | 1.2855610  | 0.0285290  | -2.8364260 |
| H | -1.5415840 | 3.3280590  | 2.3244390  | C  | 1.9002420  | -3.1104830 | -2.3910580 |
| C | -3.8666550 | -2.2024530 | 0.5039110  | H  | 1.7351520  | -3.4251460 | -3.4331770 |
| C | -4.3068280 | -0.9367010 | 0.8989240  | H  | 2.8419540  | -2.5427720 | -2.3526500 |
| C | -4.3322230 | 0.1363200  | -0.0029030 | H  | 2.0295390  | -4.0171350 | -1.7807310 |
| C | -3.9300850 | -0.1055820 | -1.3268540 | H  | -0.7781250 | -2.9100280 | -2.1493580 |
| C | -3.4753160 | -1.3653210 | -1.7228380 | C  | 4.0776370  | 1.7212330  | 1.0369480  |
| C | -3.4329860 | -2.4180270 | -0.8045740 | C  | 3.8160960  | 2.3050380  | -0.2019660 |
| H | -3.0621990 | -3.3964460 | -1.1116420 | C  | 3.7470660  | 1.4969250  | -1.3416210 |
| H | 5.0173430  | -2.3558450 | -0.6835770 | C  | 3.9304510  | 0.1174070  | -1.2351720 |
| H | 3.8816570  | -0.5045010 | -2.1320670 | C  | 4.1913030  | -0.4856950 | 0.0066110  |
| H | 3.5487370  | 1.9467290  | -2.3160400 | C  | 4.2644890  | 0.3402860  | 1.1360110  |
| H | 3.6777140  | 3.3838550  | -0.2827140 | H  | 4.4791330  | -0.1045480 | 2.1100130  |
| H | 4.1373790  | 2.3412060  | 1.9325160  | C  | 4.3657160  | -1.9751970 | 0.1154570  |
| H | 3.3935180  | -2.4834940 | 0.0164390  | H  | 4.7987850  | -2.2566840 | 1.0841130  |



**Table S144.** Geometric coordinates and single point energies for NaHMDS/NaTMDS heterodimer with 2 equivalents of toluene bound.

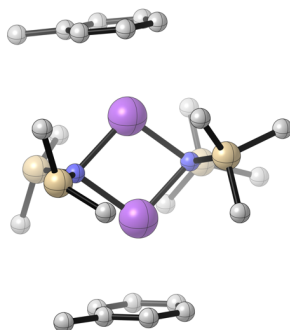

G = -2533.3757 Hartrees

G<sub>SP</sub> = -2535.070267 Hartrees

| Atom | X          | Y          | Z          | Atom | X          | Y          | Z          |
|------|------------|------------|------------|------|------------|------------|------------|
| Na   | 1.5322680  | 0.0340290  | -0.0905760 | C    | -4.1494050 | 1.0882110  | 0.9870230  |
| N    | -0.0004910 | -1.7374800 | 0.0039500  | H    | -4.0772840 | 2.0667230  | 1.4644990  |
| Na   | -1.5290280 | 0.0381270  | 0.0925820  | H    | -3.6929610 | -0.0164020 | 2.7900130  |
| N    | 0.0039970  | 1.8006480  | 0.0012620  | H    | -3.8562880 | -2.2333050 | 1.6953450  |
| Si   | -0.0715380 | 2.5358340  | -1.5379280 | C    | -4.4074760 | -2.7935530 | -0.9066690 |
| C    | 0.5494010  | 4.3228520  | -1.6427400 | H    | -5.1080960 | -3.4491740 | -0.3701580 |
| H    | 0.6578830  | 4.6318680  | -2.6945250 | H    | -4.7362660 | -2.7160120 | -1.9510740 |
| H    | -0.1440310 | 5.0247230  | -1.1563100 | H    | -3.4206230 | -3.2823980 | -0.8964300 |
| H    | 1.5326000  | 4.4272300  | -1.1554970 | H    | -4.7947940 | -0.3265610 | -2.0433070 |
| C    | 0.9882380  | 1.5719780  | -2.7982990 | H    | -4.6346840 | 1.8929810  | -0.9570320 |
| H    | 2.0440900  | 1.8723210  | -2.7156230 | Si   | 0.3558060  | -2.5900140 | 1.4454290  |
| H    | 0.9368480  | 0.4766390  | -2.6701810 | C    | 1.4435570  | -1.5464800 | 2.5996470  |
| H    | 0.6675980  | 1.7888110  | -3.8294900 | H    | 2.4288040  | -1.3232020 | 2.1623480  |
| C    | -1.8398140 | 2.5505840  | -2.2342610 | H    | 0.9582480  | -0.5890880 | 2.8495590  |
| H    | -2.2590480 | 1.5342660  | -2.3307870 | H    | 1.6254310  | -2.0776370 | 3.5467380  |
| H    | -2.4970630 | 3.1247340  | -1.5609930 | C    | -1.1670060 | -3.0775380 | 2.4579180  |
| H    | -1.8815710 | 3.0180760  | -3.2306730 | H    | -1.8624080 | -3.6712580 | 1.8440160  |
| Si   | 0.0788510  | 2.5299440  | 1.5432540  | H    | -0.8887010 | -3.6787290 | 3.3371270  |

|   |            |            |            |    |            |            |            |
|---|------------|------------|------------|----|------------|------------|------------|
| C | -0.9818480 | 1.5605740  | 2.7987620  | H  | -1.6979800 | -2.1796800 | 2.8152560  |
| H | -2.0378300 | 1.8605560  | 2.7162430  | H  | 1.1102570  | -3.8742310 | 1.2073150  |
| H | -0.9293450 | 0.4657870  | 2.6663860  | Si | -0.3613180 | -2.5878610 | -1.4376010 |
| H | -0.6625420 | 1.7734330  | 3.8311880  | C  | -1.4412730 | -1.5366040 | -2.5923450 |
| C | 1.8463940  | 2.5419510  | 2.2414340  | H  | -2.4262360 | -1.3075480 | -2.1573800 |
| H | 2.5043720  | 3.1188270  | 1.5712130  | H  | -1.6242810 | -2.0653230 | -3.5405860 |
| H | 1.8868970  | 3.0054840  | 3.2397430  | H  | -0.9493550 | -0.5819750 | -2.8400330 |
| H | 2.2655910  | 1.5252990  | 2.3344580  | C  | 1.1586900  | -3.0835440 | -2.4503070 |
| C | -0.5421710 | 4.3164930  | 1.6549130  | H  | 0.8776990  | -3.6882320 | -3.3262550 |
| H | -0.6509230 | 4.6213550  | 2.7078820  | H  | 1.6902310  | -2.1881030 | -2.8128040 |
| H | 0.1515060  | 5.0201810  | 1.1714650  | H  | 1.8544560  | -3.6754500 | -1.8350540 |
| H | -1.5251890 | 4.4229140  | 1.1677540  | H  | -1.1238900 | -3.8673760 | -1.2000830 |
| C | -4.4635520 | 0.9911150  | -0.3684030 | C  | 4.4623900  | 0.9803180  | 0.3688090  |
| C | -4.5534630 | -0.2620620 | -0.9797960 | C  | 4.1530520  | 1.0876550  | -0.9869350 |
| C | -4.3355900 | -1.4395150 | -0.2535410 | C  | 3.9393170  | -0.0743800 | -1.7364710 |
| C | -4.0274340 | -1.3274270 | 1.1110420  | C  | 4.0253840  | -1.3267130 | -1.1281750 |
| C | -3.9359650 | -0.0795480 | 1.7277200  | C  | 4.3277820  | -1.4491520 | 0.2368450  |
| H | 5.0861840  | -3.4651060 | 0.3376220  | C  | 4.5465690  | -0.2773110 | 0.9719230  |
| H | 3.8546350  | -2.2281820 | -1.7193720 | H  | 4.7844440  | -0.3497150 | 2.0357020  |
| H | 3.7004170  | -0.0032530 | -2.7991590 | C  | 4.3926080  | -2.8077890 | 0.8810970  |
| H | 4.0850720  | 2.0696320  | -1.4578440 | H  | 4.7260100  | -2.7392240 | 1.9246700  |
| H | 4.6342360  | 1.8775990  | 0.9641910  | H  | 3.4021750  | -3.2894910 | 0.8720700  |

**Table S145.** Geometric coordinates and single point energy for sodium cation with 4 THF's bound.

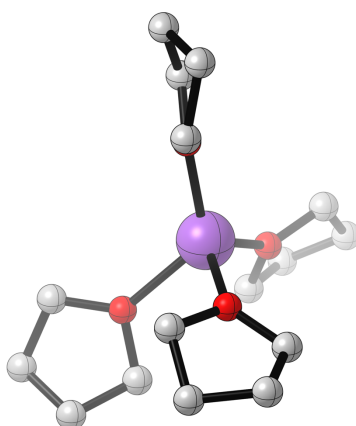

G = -1090.38512 Hartrees

G<sub>SP</sub> = -1091.488096 Hartrees

| Atom | X          | Y          | Z          | Atom | X          | Y          | Z          |
|------|------------|------------|------------|------|------------|------------|------------|
| Na   | -0.1452940 | 0.4415110  | -0.0249740 | H    | -4.4236740 | 1.2177090  | -2.4032890 |
| O    | 1.2782990  | 2.0434920  | 0.5767840  | H    | -4.8633140 | 2.6892970  | -1.5060370 |
| C    | 2.6516720  | 1.9692460  | 0.1701290  | H    | -4.6726770 | 1.4952190  | 0.6475660  |
| H    | 3.1962950  | 1.3031650  | 0.8609890  | H    | -5.4766810 | 0.2843960  | -0.3811210 |
| H    | 2.6914050  | 1.5382320  | -0.8401320 | O    | -0.5337580 | -1.3408590 | 1.2924640  |
| C    | 3.1711350  | 3.3967330  | 0.2610850  | C    | -0.2090360 | -1.5663890 | 2.6730790  |
| C    | 2.3921480  | 3.9224030  | 1.4669180  | H    | 0.8609160  | -1.3460560 | 2.8234660  |
| C    | 1.0239520  | 3.2833730  | 1.2557060  | H    | -0.7976380 | -0.8784800 | 3.2955010  |
| H    | 0.4908980  | 3.0738810  | 2.1935240  | C    | -0.5213090 | -3.0369710 | 2.9340590  |
| H    | 0.3814820  | 3.9105960  | 0.6168390  | C    | -0.2884130 | -3.6595230 | 1.5567950  |
| H    | 2.8454980  | 3.5602040  | 2.4012150  | C    | -0.8489260 | -2.5780550 | 0.6440810  |
| H    | 2.3410900  | 5.0169650  | 1.5141420  | H    | -0.4031570 | -2.5612770 | -0.3619600 |
| H    | 2.9043970  | 3.9594160  | -0.6457520 | H    | -1.9435850 | -2.6700470 | 0.5432190  |
| H    | 4.2596420  | 3.4434130  | 0.3877140  | H    | 0.7884910  | -3.7994580 | 1.3724200  |
| O    | -2.2444210 | 0.9049640  | -0.6064890 | H    | -0.7865400 | -4.6276190 | 1.4231550  |
| C    | -3.3070380 | 0.0368760  | -0.1882180 | H    | -1.5728050 | -3.1594710 | 3.2318940  |
| H    | -3.3638820 | -0.8210580 | -0.8797430 | H    | 0.1078980  | -3.4665410 | 3.7229880  |

|   |            |            |            |
|---|------------|------------|------------|
| H | -3.0738220 | -0.3365090 | 0.8188060  |
| C | -4.5674980 | 0.8863970  | -0.2625970 |
| C | -4.2601790 | 1.7740130  | -1.4687110 |
| C | -2.7757310 | 2.0612340  | -1.2723990 |
| H | -2.2318170 | 2.2110760  | -2.2153770 |
| H | -2.6183660 | 2.9426980  | -0.6299990 |
| C | 2.2165540  | -1.5870580 | -0.6259460 |
| H | 1.8450440  | -1.8137730 | 0.3847630  |
| H | 3.1483220  | -1.0034570 | -0.5363950 |
| H | 1.6379340  | -3.5631380 | -1.3067950 |
| H | 3.3959210  | -3.2865420 | -1.3554910 |
| H | 3.1576760  | -1.6860060 | -3.2068320 |
| H | 1.9968050  | -2.9494550 | -3.6721290 |
| O | 1.2265170  | -0.8017170 | -1.2990570 |
| C | 1.1090150  | -1.2110350 | -2.6707000 |
| H | 0.1206080  | -1.6781010 | -2.8150250 |
| H | 1.1728220  | -0.3235890 | -3.3152280 |
| C | 2.2401120  | -2.2090530 | -2.9004820 |
| C | 2.4185320  | -2.8120830 | -1.5064320 |

**Table S146.** Geometric coordinates and single point energies for NaHMDS TMEDA disolvated monomer with  $\kappa^2$ - $\kappa^1$  connectivity.

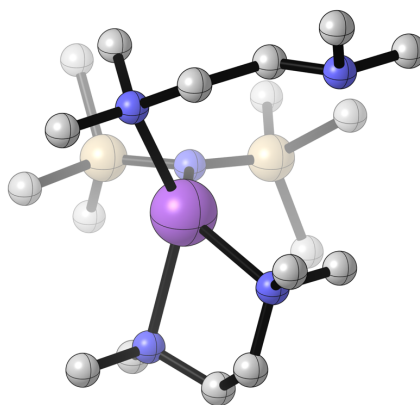

G = -1729.014742 Hartrees

G<sub>SP</sub> = -1730.400684 Hartrees

| Atom | X          | Y          | Z          | Atom | X          | Y          | Z          |
|------|------------|------------|------------|------|------------|------------|------------|
| C    | 2.2882370  | 0.3808350  | 3.0377250  | H    | -4.0080720 | -2.3805700 | 1.4740540  |
| Si   | 1.7641340  | 1.5352550  | 1.6143780  | C    | -1.7990610 | -0.9417160 | 2.1407170  |
| N    | 1.5946190  | 0.7076200  | 0.1422500  | H    | -2.2656010 | 0.0285280  | 1.9184330  |
| Si   | 2.8224100  | 0.5571370  | -1.0183520 | H    | -2.2574360 | -1.3427980 | 3.0687570  |
| C    | 4.5046580  | -0.0348450 | -0.3464210 | H    | -0.7284080 | -0.7734830 | 2.3336550  |
| H    | 5.2434780  | -0.1442270 | -1.1568430 | H    | -1.9582440 | -3.5632170 | 2.2282480  |
| H    | 4.9097010  | 0.6927110  | 0.3746930  | H    | -1.8720630 | -3.8435070 | 0.4850750  |
| H    | 4.4257240  | -1.0013890 | 0.1748920  | H    | 0.3615490  | -2.6471770 | 2.2216000  |
| C    | 3.2330570  | 2.1542190  | -1.9653330 | H    | 0.2494280  | -4.3319060 | 1.6952970  |
| H    | 3.6616950  | 2.9041610  | -1.2828170 | C    | 2.1458400  | -2.7842790 | 0.4793640  |
| H    | 3.9669850  | 1.9692860  | -2.7664500 | H    | 2.5686050  | -3.7325850 | 0.8711110  |
| H    | 2.3338200  | 2.5983950  | -2.4200580 | H    | 2.6823900  | -2.5140050 | -0.4387170 |
| C    | 2.3431040  | -0.7221980 | -2.3806350 | H    | 2.3100790  | -1.9771700 | 1.2071240  |
| H    | 3.1235010  | -1.4926390 | -2.4916290 | C    | 0.4904540  | -3.8393110 | -0.8981980 |
| H    | 1.3977480  | -1.2497820 | -2.1663410 | H    | 1.0860510  | -3.5354250 | -1.7700800 |
| H    | 2.2345150  | -0.2424400 | -3.3668220 | H    | 0.7769060  | -4.8773500 | -0.6273930 |
| Na   | -0.1292200 | -0.6795330 | -0.2973620 | H    | -0.5672720 | -3.8402420 | -1.1978470 |

|   |            |            |            |   |            |            |            |
|---|------------|------------|------------|---|------------|------------|------------|
| N | 0.7216880  | -2.9081270 | 0.1939820  | N | -1.2699000 | 0.2926900  | -2.2095360 |
| C | 0.0015490  | -3.2884200 | 1.4019720  | C | -2.5864340 | 0.6917230  | -1.7285490 |
| C | -1.5117250 | -3.1796190 | 1.2853300  | C | -2.5259430 | 1.6652350  | -0.5528290 |
| N | -2.0024970 | -1.8337340 | 1.0055820  | N | -3.7246570 | 1.6173650  | 0.2684540  |
| C | -3.4205420 | -1.8858930 | 0.6727470  | C | -3.6161140 | 2.5337890  | 1.3869890  |
| H | -3.8026230 | -0.8633580 | 0.5445550  | H | -4.4834290 | 2.4177760  | 2.0521160  |
| H | -3.5685130 | -2.4520560 | -0.2590310 | H | -2.7028060 | 2.3259620  | 1.9610370  |
| H | -3.5701220 | 3.5941780  | 1.0580890  | H | -0.6472180 | 1.5655370  | 2.3504650  |
| C | -4.9338010 | 1.8727350  | -0.4887600 | H | 1.5633070  | -0.4415080 | 3.1674620  |
| H | -5.7991160 | 1.8562820  | 0.1883310  | H | 3.2652930  | -0.0762600 | 2.8109490  |
| H | -4.9144630 | 2.8618990  | -0.9964920 | H | 2.3740310  | 0.9050640  | 4.0027290  |
| H | -5.0932540 | 1.0982750  | -1.2516360 |   |            |            |            |
| H | -2.3413560 | 2.6983960  | -0.9244530 |   |            |            |            |
| H | -1.6591880 | 1.4164400  | 0.0860700  |   |            |            |            |
| H | -3.1192700 | -0.2159570 | -1.4051860 |   |            |            |            |
| H | -3.1748230 | 1.1372880  | -2.5607190 |   |            |            |            |
| C | -1.4070390 | -0.6527150 | -3.3054970 |   |            |            |            |
| H | -1.9403910 | -0.2111570 | -4.1726520 |   |            |            |            |
| H | -0.4136850 | -0.9805640 | -3.6421520 |   |            |            |            |
| H | -1.9731180 | -1.5351140 | -2.9699020 |   |            |            |            |
| C | -0.4694380 | 1.4452340  | -2.6086090 |   |            |            |            |
| H | 0.4689130  | 1.0950650  | -3.0564670 |   |            |            |            |
| H | -1.0045230 | 2.0749730  | -3.3500950 |   |            |            |            |
| H | -0.1970370 | 2.0470370  | -1.7309650 |   |            |            |            |
| C | 3.0092410  | 2.9714530  | 1.6150270  |   |            |            |            |
| H | 2.7039810  | 3.7463500  | 0.8941380  |   |            |            |            |
| H | 3.0692990  | 3.4400920  | 2.6101670  |   |            |            |            |
| H | 4.0228900  | 2.6409590  | 1.3392620  |   |            |            |            |
| C | 0.1261870  | 2.3280390  | 2.1720130  |   |            |            |            |
| H | 0.2511300  | 2.8971500  | 3.1067960  |   |            |            |            |
| H | -0.2473100 | 3.0191630  | 1.3988200  |   |            |            |            |
